# Supplementary material
Source: publisher figshare collection journal article supplement (https://acs.figshare.com/ndownloader/files/3928189)
Supplement: Supplementary file 1 [file 3928189]

 
data_cu_dm14205_0m 
  
_audit_creation_method            SHELXL-2013 
_chemical_name_systematic 
; 
 ? 
; 
_chemical_name_common             ? 
_chemical_melting_point           ? 
_chemical_formula_moiety          ? 
_chemical_formula_sum 
 'C33 H33 Cl2 N3 O3' 
_chemical_formula_weight          590.52 
  
loop_ 
 _atom_type_symbol 
 _atom_type_description 
 _atom_type_scat_dispersion_real 
 _atom_type_scat_dispersion_imag 
 _atom_type_scat_source 
 'C'  'C'   0.0181   0.0091 
 'International Tables Vol C Tables 4.2.6.8 and 6.1.1.4' 
 'H'  'H'   0.0000   0.0000 
 'International Tables Vol C Tables 4.2.6.8 and 6.1.1.4' 
 'N'  'N'   0.0311   0.0180 
 'International Tables Vol C Tables 4.2.6.8 and 6.1.1.4' 
 'O'  'O'   0.0492   0.0322 
 'International Tables Vol C Tables 4.2.6.8 and 6.1.1.4' 
 'Cl'  'Cl'   0.3639   0.7018 
 'International Tables Vol C Tables 4.2.6.8 and 6.1.1.4' 
  
_space_group_crystal_system       monoclinic 
_space_group_IT_number            4 
_space_group_name_H-M_alt         'P 21' 
_space_group_name_Hall            'P 2yb' 
  
_shelx_space_group_comment 
; 
The symmetry employed for this shelxl refinement is uniquely defined 
by the following loop, which should always be used as a source of 
symmetry information in preference to the above space-group names. 
They are only intended as comments. 
; 
  
loop_ 
 _space_group_symop_operation_xyz 
 'x, y, z' 
 '-x, y+1/2, -z' 
  
_cell_length_a                    11.7883(6) 
_cell_length_b                    17.9576(9) 
_cell_length_c                    14.1225(7) 
_cell_angle_alpha                 90 
_cell_angle_beta                  90.594(4) 
_cell_angle_gamma                 90 
_cell_volume                      2989.4(3) 
_cell_formula_units_Z             4 
_cell_measurement_temperature     140(2) 
_cell_measurement_reflns_used     2392 
_cell_measurement_theta_min       3.13 
_cell_measurement_theta_max       60.38 
  
_exptl_crystal_description        needle 
_exptl_crystal_colour             colourless 
_exptl_crystal_density_meas       ? 
_exptl_crystal_density_method     ? 
_exptl_crystal_density_diffrn     1.312 
_exptl_crystal_F_000              1240 
_exptl_transmission_factor_min    ? 
_exptl_transmission_factor_max    ? 
_exptl_crystal_size_max           0.200 
_exptl_crystal_size_mid           0.080 
_exptl_crystal_size_min           0.020 
_exptl_absorpt_coefficient_mu     2.261 
_shelx_estimated_absorpt_T_min    0.661 
_shelx_estimated_absorpt_T_max    0.956 
_exptl_absorpt_correction_type    multi-scan
_exptl_absorpt_correction_T_min   0.5912
_exptl_absorpt_correction_T_max   0.7533
_exptl_absorpt_process_details    sadabs
  
_exptl_special_details 
; 
 ? 
; 
  
_diffrn_ambient_temperature       140(2) 
_diffrn_radiation_wavelength      1.54178 
_diffrn_radiation_type            CuK\a 
_diffrn_source                    ? 
_diffrn_measurement_device_type   'Bruker APEX-II CCD' 
_diffrn_measurement_method        '\f and \w scans' 
_diffrn_detector_area_resol_mean  ? 
_diffrn_reflns_number             24313 
_diffrn_reflns_av_unetI/netI      0.0976 
_diffrn_reflns_av_R_equivalents   0.0807 
_diffrn_reflns_limit_h_min        -14 
_diffrn_reflns_limit_h_max        14 
_diffrn_reflns_limit_k_min        -20 
_diffrn_reflns_limit_k_max        15 
_diffrn_reflns_limit_l_min        -17 
_diffrn_reflns_limit_l_max        17 
_diffrn_reflns_theta_min          3.129 
_diffrn_reflns_theta_max          69.803 
_diffrn_reflns_theta_full         67.679 
_diffrn_measured_fraction_theta_max   0.938 
_diffrn_measured_fraction_theta_full  0.956 
_diffrn_reflns_Laue_measured_fraction_max    0.938 
_diffrn_reflns_Laue_measured_fraction_full   0.956 
_diffrn_reflns_point_group_measured_fraction_max   0.731 
_diffrn_reflns_point_group_measured_fraction_full  0.749 
_reflns_number_total              8251 
_reflns_number_gt                 6576 
_reflns_threshold_expression      'I > 2\s(I)' 
_reflns_Friedel_coverage          0.506 
_reflns_Friedel_fraction_max      0.509 
_reflns_Friedel_fraction_full     0.527 
  
_reflns_special_details 
; 
 Reflections were merged by SHELXL according to the crystal 
 class for the calculation of statistics and refinement. 
  
 _reflns_Friedel_fraction is defined as the number of unique 
 Friedel pairs measured divided by the number that would be 
 possible theoretically, ignoring centric projections and 
 systematic absences. 
; 
  
_computing_data_collection        'Bruker APEX2' 
_computing_cell_refinement        'Bruker SAINT' 
_computing_data_reduction         'Bruker SAINT' 
_computing_structure_solution     'SHELXS-97 (Sheldrick, 2008)' 
_computing_structure_refinement   'SHELXL-2013 (Sheldrick, 2013)' 
_computing_molecular_graphics     'Bruker SHELXTL' 
_computing_publication_material   'Bruker SHELXTL' 
  
_refine_special_details 
; 
 ? 
; 
_refine_ls_structure_factor_coef  Fsqd 
_refine_ls_matrix_type            full 
_refine_ls_weighting_scheme       calc 
_refine_ls_weighting_details 
'w=1/[\s^2^(Fo^2^)+(0.0966P)^2^+0.3206P] where P=(Fo^2^+2Fc^2^)/3' 
_atom_sites_solution_primary      ? 
_atom_sites_solution_secondary    ? 
_atom_sites_solution_hydrogens    geom 
_refine_ls_hydrogen_treatment     constr 
_refine_ls_extinction_method      none 
_refine_ls_extinction_coef        . 
_refine_ls_abs_structure_details 
; 
 Flack x determined using 1765 quotients [(I+)-(I-)]/[(I+)+(I-)] 
 (Parsons and Flack (2004), Acta Cryst. A60, s61). 
; 
_refine_ls_abs_structure_Flack    0.045(18) 
_chemical_absolute_configuration  ad
_refine_ls_number_reflns          8251 
_refine_ls_number_parameters      747 
_refine_ls_number_restraints      1 
_refine_ls_R_factor_all           0.0797 
_refine_ls_R_factor_gt            0.0618 
_refine_ls_wR_factor_ref          0.1786 
_refine_ls_wR_factor_gt           0.1624 
_refine_ls_goodness_of_fit_ref    1.026 
_refine_ls_restrained_S_all       1.026 
_refine_ls_shift/su_max           0.008 
_refine_ls_shift/su_mean          0.000 
  
loop_ 
 _atom_site_label 
 _atom_site_type_symbol 
 _atom_site_fract_x 
 _atom_site_fract_y 
 _atom_site_fract_z 
 _atom_site_U_iso_or_equiv 
 _atom_site_adp_type 
 _atom_site_occupancy 
 _atom_site_site_symmetry_order 
 _atom_site_calc_flag 
 _atom_site_refinement_flags_posn 
 _atom_site_refinement_flags_adp 
 _atom_site_refinement_flags_occupancy 
 _atom_site_disorder_assembly 
 _atom_site_disorder_group 
N1 N 0.4164(4) 0.1889(3) 0.1856(4) 0.0353(12) Uani 1 1 d . . . . . 
H1A H 0.4053 0.1721 0.1277 0.042 Uiso 1 1 calc R U . . . 
N2 N 0.5256(5) 0.3534(3) -0.1176(4) 0.0356(12) Uani 1 1 d . . . . . 
N3 N 0.5434(5) 0.0762(3) -0.0313(4) 0.0404(13) Uani 1 1 d . . . . . 
H3A H 0.5282 0.0333 -0.0588 0.048 Uiso 1 1 calc R U . . . 
N4 N 0.7199(4) 0.1253(3) 0.6967(4) 0.0363(12) Uani 1 1 d . . . . . 
H4C H 0.7335 0.1244 0.7581 0.044 Uiso 1 1 calc R U . . . 
N5 N 1.1379(4) 0.0413(3) 0.8189(4) 0.0373(12) Uani 1 1 d . . . . . 
N6 N 0.8540(4) 0.2439(3) 0.9061(4) 0.0378(12) Uani 1 1 d . . . . . 
H6A H 0.8261 0.2646 0.9573 0.045 Uiso 1 1 calc R U . . . 
O1 O 0.4937(4) 0.4270(3) 0.0650(3) 0.0420(11) Uani 1 1 d . . . . . 
O2 O 0.6763(4) 0.3367(3) -0.0150(3) 0.0376(10) Uani 1 1 d . . . . . 
O3 O 0.3454(4) -0.0102(3) 0.4809(4) 0.0561(15) Uani 1 1 d . . . . . 
O4 O 1.0395(3) -0.0258(3) 0.6494(3) 0.0370(10) Uani 1 1 d . . . . . 
O5 O 1.1355(4) 0.1241(3) 0.6946(3) 0.0409(11) Uani 1 1 d . . . . . 
O6 O 0.3480(4) 0.2968(3) 0.5818(4) 0.0458(12) Uani 1 1 d . . . . . 
C1 C 0.4512(5) 0.2599(4) 0.1950(4) 0.0307(12) Uani 1 1 d . . . . . 
C2 C 0.4618(6) 0.2887(4) 0.2937(5) 0.0394(14) Uani 1 1 d . . . . . 
H2A H 0.5412 0.2821 0.3156 0.047 Uiso 1 1 calc R U . . . 
H2B H 0.4130 0.2584 0.3353 0.047 Uiso 1 1 calc R U . . . 
C3 C 0.4294(6) 0.3703(4) 0.3046(5) 0.0378(14) Uani 1 1 d . . . . . 
C4 C 0.4907(7) 0.4151(4) 0.2313(5) 0.0485(18) Uani 1 1 d . . . . . 
H4A H 0.5709 0.4205 0.2518 0.058 Uiso 1 1 calc R U . . . 
H4B H 0.4570 0.4656 0.2292 0.058 Uiso 1 1 calc R U . . . 
C5 C 0.4883(5) 0.3832(4) 0.1327(4) 0.0350(14) Uani 1 1 d . . . . . 
C6 C 0.4803(5) 0.3037(3) 0.1188(4) 0.0310(13) Uani 1 1 d . . . . . 
C7 C 0.3018(6) 0.3778(5) 0.2903(6) 0.0537(19) Uani 1 1 d . . . . . 
H7A H 0.2800 0.4302 0.2959 0.080 Uiso 1 1 calc R U . . . 
H7B H 0.2626 0.3485 0.3386 0.080 Uiso 1 1 calc R U . . . 
H7C H 0.2806 0.3593 0.2273 0.080 Uiso 1 1 calc R U . . . 
C8 C 0.4615(7) 0.3975(4) 0.4033(5) 0.0489(17) Uani 1 1 d . . . . . 
H8A H 0.5394 0.3822 0.4185 0.073 Uiso 1 1 calc R U . . . 
H8B H 0.4097 0.3759 0.4497 0.073 Uiso 1 1 calc R U . . . 
H8C H 0.4562 0.4520 0.4055 0.073 Uiso 1 1 calc R U . . . 
C9 C 0.4904(5) 0.2771(3) 0.0156(4) 0.0296(12) Uani 1 1 d . . . . . 
C10 C 0.5774(5) 0.3267(4) -0.0373(4) 0.0330(13) Uani 1 1 d . . . . . 
C11 C 0.3853(5) 0.2880(4) -0.0443(5) 0.0350(13) Uani 1 1 d . . . . . 
C12 C 0.2768(5) 0.2601(4) -0.0341(5) 0.0406(15) Uani 1 1 d . . . . . 
H12 H 0.2586 0.2299 0.0188 0.049 Uiso 1 1 calc R U . . . 
C13 C 0.1941(6) 0.2770(5) -0.1027(6) 0.0519(19) Uani 1 1 d . . . . . 
H13 H 0.1195 0.2576 -0.0970 0.062 Uiso 1 1 calc R U . . . 
C14 C 0.2214(7) 0.3221(5) -0.1789(5) 0.054(2) Uani 1 1 d . . . . . 
H14 H 0.1651 0.3325 -0.2257 0.065 Uiso 1 1 calc R U . . . 
C15 C 0.3301(7) 0.3528(5) -0.1885(5) 0.0493(18) Uani 1 1 d . . . . . 
H15 H 0.3475 0.3857 -0.2390 0.059 Uiso 1 1 calc R U . . . 
C16 C 0.4107(6) 0.3330(4) -0.1215(5) 0.0414(15) Uani 1 1 d . . . . . 
C17 C 0.5736(7) 0.4109(5) -0.1765(5) 0.055(2) Uani 1 1 d . . . . . 
H17A H 0.6544 0.4165 -0.1612 0.083 Uiso 1 1 calc R U . . . 
H17B H 0.5343 0.4580 -0.1649 0.083 Uiso 1 1 calc R U . . . 
H17C H 0.5646 0.3970 -0.2433 0.083 Uiso 1 1 calc R U . . . 
C18 C 0.5338(5) 0.1977(3) 0.0082(4) 0.0301(12) Uani 1 1 d . . . . . 
C19 C 0.4872(6) 0.1417(4) -0.0461(5) 0.0388(14) Uani 1 1 d . . . . . 
H19 H 0.4245 0.1478 -0.0882 0.047 Uiso 1 1 calc R U . . . 
C20 C 0.6266(5) 0.1636(4) 0.0591(4) 0.0338(13) Uani 1 1 d . . . . . 
C21 C 0.7067(5) 0.1901(4) 0.1271(5) 0.0372(14) Uani 1 1 d . . . . . 
H21 H 0.7097 0.2413 0.1441 0.045 Uiso 1 1 calc R U . . . 
C22 C 0.7805(6) 0.1388(4) 0.1679(5) 0.0446(16) Uani 1 1 d . . . . . 
H22 H 0.8329 0.1549 0.2152 0.054 Uiso 1 1 calc R U . . . 
C23 C 0.7794(6) 0.0638(4) 0.1410(5) 0.0467(17) Uani 1 1 d . . . . . 
H23 H 0.8321 0.0303 0.1693 0.056 Uiso 1 1 calc R U . . . 
C24 C 0.7036(6) 0.0378(4) 0.0746(5) 0.0456(17) Uani 1 1 d . . . . . 
H24 H 0.7024 -0.0132 0.0567 0.055 Uiso 1 1 calc R U . . . 
C25 C 0.6278(5) 0.0892(4) 0.0340(4) 0.0377(15) Uani 1 1 d . . . . . 
C26 C 0.3959(5) 0.1382(4) 0.2627(4) 0.0333(13) Uani 1 1 d . . . . . 
C27 C 0.2911(5) 0.1364(4) 0.3042(5) 0.0417(15) Uani 1 1 d . . . . . 
H27 H 0.2323 0.1684 0.2822 0.050 Uiso 1 1 calc R U . . . 
C28 C 0.2713(5) 0.0868(4) 0.3794(5) 0.0419(16) Uani 1 1 d . . . . . 
H28 H 0.1993 0.0856 0.4089 0.050 Uiso 1 1 calc R U . . . 
C29 C 0.3557(5) 0.0408(4) 0.4094(4) 0.0369(14) Uani 1 1 d . . . . . 
C30 C 0.4614(6) 0.0430(5) 0.3653(5) 0.0464(17) Uani 1 1 d . . . . . 
H30 H 0.5203 0.0108 0.3867 0.056 Uiso 1 1 calc R U . . . 
C31 C 0.4811(5) 0.0905(4) 0.2923(5) 0.0396(15) Uani 1 1 d . . . . . 
H31 H 0.5526 0.0909 0.2620 0.048 Uiso 1 1 calc R U . . . 
C32 C 0.2392(7) -0.0133(5) 0.5284(5) 0.053(2) Uani 1 1 d . . . . . 
H32A H 0.2221 0.0356 0.5556 0.080 Uiso 1 1 calc R U . . . 
H32B H 0.2433 -0.0505 0.5791 0.080 Uiso 1 1 calc R U . . . 
H32C H 0.1792 -0.0271 0.4832 0.080 Uiso 1 1 calc R U . . . 
C33 C 0.7915(5) 0.0875(4) 0.6419(4) 0.0328(13) Uani 1 1 d . . . . . 
C34 C 0.7468(5) 0.0702(4) 0.5424(4) 0.0384(15) Uani 1 1 d . . . . . 
H34A H 0.7168 0.1167 0.5142 0.046 Uiso 1 1 calc R U . . . 
H34B H 0.6827 0.0349 0.5478 0.046 Uiso 1 1 calc R U . . . 
C35 C 0.8340(5) 0.0371(4) 0.4750(4) 0.0382(15) Uani 1 1 d . . . . . 
C36 C 0.8981(5) -0.0240(4) 0.5283(4) 0.0374(14) Uani 1 1 d . . . . . 
H36A H 0.9580 -0.0444 0.4871 0.045 Uiso 1 1 calc R U . . . 
H36B H 0.8451 -0.0649 0.5433 0.045 Uiso 1 1 calc R U . . . 
C37 C 0.9524(5) 0.0045(4) 0.6201(4) 0.0331(13) Uani 1 1 d . . . . . 
C38 C 0.8961(5) 0.0616(4) 0.6725(4) 0.0332(13) Uani 1 1 d . . . . . 
C39 C 0.9150(6) 0.0964(5) 0.4384(5) 0.0503(18) Uani 1 1 d . . . . . 
H39A H 0.9675 0.0738 0.3933 0.075 Uiso 1 1 calc R U . . . 
H39B H 0.9581 0.1176 0.4916 0.075 Uiso 1 1 calc R U . . . 
H39C H 0.8715 0.1358 0.4067 0.075 Uiso 1 1 calc R U . . . 
C40 C 0.7723(6) 0.0015(5) 0.3907(5) 0.0494(18) Uani 1 1 d . . . . . 
H40A H 0.7324 0.0402 0.3544 0.074 Uiso 1 1 calc R U . . . 
H40B H 0.7174 -0.0351 0.4136 0.074 Uiso 1 1 calc R U . . . 
H40C H 0.8275 -0.0233 0.3500 0.074 Uiso 1 1 calc R U . . . 
C41 C 0.9550(4) 0.0820(3) 0.7664(4) 0.0287(12) Uani 1 1 d . . . . . 
C42 C 1.0856(5) 0.0861(4) 0.7516(5) 0.0350(13) Uani 1 1 d . . . . . 
C43 C 0.9488(5) 0.0193(3) 0.8383(4) 0.0297(12) Uani 1 1 d . . . . . 
C44 C 0.8559(5) -0.0172(4) 0.8754(4) 0.0349(13) Uani 1 1 d . . . . . 
H44 H 0.7810 -0.0011 0.8602 0.042 Uiso 1 1 calc R U . . . 
C45 C 0.8739(7) -0.0777(4) 0.9352(5) 0.0462(17) Uani 1 1 d . . . . . 
H45 H 0.8110 -0.1038 0.9607 0.055 Uiso 1 1 calc R U . . . 
C46 C 0.9829(6) -0.0998(4) 0.9576(5) 0.0457(16) Uani 1 1 d . . . . . 
H46 H 0.9934 -0.1416 0.9981 0.055 Uiso 1 1 calc R U . . . 
C47 C 1.0777(6) -0.0637(4) 0.9234(5) 0.0422(16) Uani 1 1 d . . . . . 
H47 H 1.1524 -0.0791 0.9402 0.051 Uiso 1 1 calc R U . . . 
C48 C 1.0584(5) -0.0039(4) 0.8634(4) 0.0341(13) Uani 1 1 d . . . . . 
C49 C 1.2578(5) 0.0237(5) 0.8133(6) 0.0496(18) Uani 1 1 d . . . . . 
H49A H 1.2676 -0.0224 0.7771 0.074 Uiso 1 1 calc R U . . . 
H49B H 1.2890 0.0170 0.8773 0.074 Uiso 1 1 calc R U . . . 
H49C H 1.2977 0.0645 0.7818 0.074 Uiso 1 1 calc R U . . . 
C50 C 0.9208(5) 0.1571(4) 0.8080(4) 0.0324(13) Uani 1 1 d . . . . . 
C51 C 0.8755(5) 0.1699(4) 0.8947(4) 0.0349(13) Uani 1 1 d . . . . . 
H51 H 0.8610 0.1326 0.9407 0.042 Uiso 1 1 calc R U . . . 
C52 C 0.9261(5) 0.2283(4) 0.7601(4) 0.0333(13) Uani 1 1 d . . . . . 
C53 C 0.9577(5) 0.2525(4) 0.6700(5) 0.0375(14) Uani 1 1 d . . . . . 
H53 H 0.9873 0.2183 0.6253 0.045 Uiso 1 1 calc R U . . . 
C54 C 0.9454(6) 0.3260(4) 0.6472(5) 0.0438(16) Uani 1 1 d . . . . . 
H54 H 0.9645 0.3423 0.5853 0.053 Uiso 1 1 calc R U . . . 
C55 C 0.9055(6) 0.3777(4) 0.7124(6) 0.0479(17) Uani 1 1 d . . . . . 
H55 H 0.9000 0.4286 0.6946 0.057 Uiso 1 1 calc R U . . . 
C56 C 0.8740(6) 0.3569(4) 0.8018(5) 0.0423(16) Uani 1 1 d . . . . . 
H56 H 0.8472 0.3923 0.8462 0.051 Uiso 1 1 calc R U . . . 
C57 C 0.8829(5) 0.2808(4) 0.8250(4) 0.0357(14) Uani 1 1 d . . . . . 
C58 C 0.6231(5) 0.1673(4) 0.6651(4) 0.0356(14) Uani 1 1 d . . . . . 
C59 C 0.6355(5) 0.2422(4) 0.6411(5) 0.0464(17) Uani 1 1 d . . . . . 
H59 H 0.7082 0.2650 0.6437 0.056 Uiso 1 1 calc R U . . . 
C60 C 0.5424(5) 0.2828(4) 0.6138(5) 0.0451(16) Uani 1 1 d . . . . . 
H60 H 0.5510 0.3338 0.5974 0.054 Uiso 1 1 calc R U . . . 
C61 C 0.4354(5) 0.2502(4) 0.6098(5) 0.0380(15) Uani 1 1 d . . . . . 
C62 C 0.4228(5) 0.1763(4) 0.6327(5) 0.0432(16) Uani 1 1 d . . . . . 
H62 H 0.3503 0.1534 0.6289 0.052 Uiso 1 1 calc R U . . . 
C63 C 0.5172(5) 0.1356(4) 0.6615(5) 0.0429(16) Uani 1 1 d . . . . . 
H63 H 0.5083 0.0849 0.6789 0.051 Uiso 1 1 calc R U . . . 
C64 C 0.2390(5) 0.2639(5) 0.5710(6) 0.0526(19) Uani 1 1 d . . . . . 
H64A H 0.2419 0.2249 0.5225 0.079 Uiso 1 1 calc R U . . . 
H64B H 0.1840 0.3020 0.5518 0.079 Uiso 1 1 calc R U . . . 
H64C H 0.2159 0.2419 0.6314 0.079 Uiso 1 1 calc R U . . . 
C65 C 0.9239(9) 0.3121(6) 0.2925(8) 0.081(3) Uani 1 1 d . . . . . 
H65A H 0.9233 0.2897 0.2285 0.097 Uiso 1 1 calc R U . . . 
H65B H 0.9382 0.3662 0.2857 0.097 Uiso 1 1 calc R U . . . 
C66 C 0.0907(9) 0.1010(7) 0.0548(10) 0.095(4) Uani 1 1 d . . . . . 
H66A H 0.0862 0.1135 -0.0134 0.114 Uiso 1 1 calc R U . . . 
H66B H 0.0295 0.0648 0.0681 0.114 Uiso 1 1 calc R U . . . 
Cl1 Cl 1.03209(19) 0.27265(15) 0.3593(2) 0.0799(7) Uani 1 1 d . . . . . 
Cl2 Cl 0.7924(2) 0.29872(19) 0.3443(3) 0.1248(16) Uani 1 1 d . . . . . 
Cl3 Cl 0.06645(19) 0.18099(18) 0.1196(2) 0.0864(8) Uani 1 1 d . . . . . 
Cl4 Cl 0.2223(2) 0.05804(15) 0.07805(19) 0.0780(7) Uani 1 1 d . . . . . 
  
loop_ 
 _atom_site_aniso_label 
 _atom_site_aniso_U_11 
 _atom_site_aniso_U_22 
 _atom_site_aniso_U_33 
 _atom_site_aniso_U_23 
 _atom_site_aniso_U_13 
 _atom_site_aniso_U_12 
N1 0.043(3) 0.026(3) 0.036(3) 0.002(2) 0.006(2) -0.002(2) 
N2 0.046(3) 0.025(3) 0.036(3) 0.001(2) 0.003(2) -0.003(2) 
N3 0.055(3) 0.015(3) 0.051(3) -0.005(2) 0.007(3) -0.001(2) 
N4 0.029(2) 0.044(3) 0.036(3) 0.002(2) 0.000(2) 0.006(2) 
N5 0.026(2) 0.042(3) 0.044(3) -0.004(2) -0.002(2) 0.003(2) 
N6 0.037(3) 0.034(3) 0.042(3) -0.009(2) 0.006(2) 0.001(2) 
O1 0.057(3) 0.025(3) 0.045(2) 0.003(2) 0.012(2) 0.0032(19) 
O2 0.038(2) 0.028(3) 0.047(2) 0.0006(19) 0.0098(19) -0.0004(17) 
O3 0.048(3) 0.061(4) 0.060(3) 0.031(3) 0.015(2) 0.008(2) 
O4 0.033(2) 0.034(3) 0.044(2) 0.0003(19) 0.0057(18) 0.0056(18) 
O5 0.035(2) 0.036(3) 0.052(3) 0.003(2) 0.012(2) 0.0014(18) 
O6 0.034(2) 0.043(3) 0.061(3) 0.013(2) -0.002(2) 0.0036(19) 
C1 0.030(3) 0.025(3) 0.037(3) 0.000(2) 0.001(2) -0.001(2) 
C2 0.046(3) 0.033(4) 0.040(3) 0.002(3) 0.008(3) -0.003(3) 
C3 0.050(3) 0.023(4) 0.040(3) -0.001(3) 0.005(3) -0.004(3) 
C4 0.074(5) 0.030(4) 0.041(4) -0.003(3) 0.011(3) -0.015(3) 
C5 0.034(3) 0.033(4) 0.038(3) -0.002(3) 0.008(2) -0.004(2) 
C6 0.034(3) 0.022(3) 0.037(3) 0.002(2) 0.008(2) 0.002(2) 
C7 0.051(4) 0.054(5) 0.056(4) -0.005(4) 0.009(3) 0.018(4) 
C8 0.067(4) 0.038(4) 0.042(4) -0.003(3) 0.004(3) -0.009(3) 
C9 0.034(3) 0.022(3) 0.033(3) -0.002(2) 0.003(2) 0.004(2) 
C10 0.040(3) 0.024(3) 0.035(3) -0.005(3) 0.007(3) -0.003(2) 
C11 0.035(3) 0.027(4) 0.043(3) -0.004(3) 0.001(2) 0.005(2) 
C12 0.035(3) 0.029(4) 0.058(4) -0.003(3) 0.005(3) 0.000(3) 
C13 0.039(3) 0.049(5) 0.068(5) -0.016(4) -0.008(3) 0.008(3) 
C14 0.056(4) 0.059(5) 0.049(4) -0.013(4) -0.014(3) 0.014(4) 
C15 0.063(4) 0.049(5) 0.036(3) -0.003(3) -0.008(3) 0.011(4) 
C16 0.047(4) 0.042(4) 0.036(3) -0.008(3) -0.002(3) 0.006(3) 
C17 0.068(5) 0.049(5) 0.049(4) 0.018(4) 0.014(4) -0.002(4) 
C18 0.036(3) 0.021(3) 0.033(3) 0.001(2) 0.004(2) -0.003(2) 
C19 0.048(4) 0.028(4) 0.040(3) -0.006(3) 0.005(3) -0.001(3) 
C20 0.037(3) 0.026(4) 0.038(3) -0.001(3) 0.009(2) 0.004(2) 
C21 0.032(3) 0.037(4) 0.043(3) 0.002(3) 0.008(3) 0.000(3) 
C22 0.035(3) 0.051(5) 0.047(4) 0.001(3) 0.001(3) 0.002(3) 
C23 0.046(4) 0.035(4) 0.060(4) 0.013(3) 0.018(3) 0.012(3) 
C24 0.051(4) 0.034(4) 0.052(4) 0.004(3) 0.019(3) 0.012(3) 
C25 0.040(3) 0.036(4) 0.038(3) 0.005(3) 0.013(3) 0.004(3) 
C26 0.036(3) 0.025(3) 0.039(3) 0.002(2) 0.005(2) -0.008(2) 
C27 0.037(3) 0.037(4) 0.052(4) 0.010(3) 0.009(3) 0.006(3) 
C28 0.036(3) 0.045(4) 0.045(3) 0.011(3) 0.014(3) -0.006(3) 
C29 0.032(3) 0.039(4) 0.039(3) 0.004(3) 0.009(2) 0.004(3) 
C30 0.035(3) 0.059(5) 0.045(4) 0.016(3) 0.007(3) 0.006(3) 
C31 0.031(3) 0.044(4) 0.044(3) 0.004(3) 0.006(3) 0.005(3) 
C32 0.057(4) 0.052(5) 0.051(4) 0.019(4) 0.020(3) -0.002(4) 
C33 0.032(3) 0.027(3) 0.039(3) -0.003(3) 0.006(2) 0.003(2) 
C34 0.032(3) 0.046(4) 0.037(3) 0.006(3) 0.001(2) 0.004(3) 
C35 0.035(3) 0.047(4) 0.032(3) 0.004(3) 0.002(2) -0.002(3) 
C36 0.038(3) 0.037(4) 0.038(3) -0.004(3) 0.003(3) 0.004(3) 
C37 0.030(3) 0.030(4) 0.040(3) 0.002(3) 0.006(2) 0.001(2) 
C38 0.032(3) 0.031(4) 0.037(3) 0.000(3) 0.004(2) -0.002(2) 
C39 0.048(4) 0.058(5) 0.045(4) 0.009(3) 0.009(3) -0.003(3) 
C40 0.045(4) 0.062(5) 0.041(4) -0.001(3) 0.000(3) 0.004(3) 
C41 0.024(2) 0.026(3) 0.036(3) 0.002(2) 0.002(2) 0.002(2) 
C42 0.029(3) 0.029(4) 0.046(3) -0.003(3) 0.004(3) 0.001(2) 
C43 0.036(3) 0.018(3) 0.035(3) -0.003(2) 0.005(2) -0.001(2) 
C44 0.037(3) 0.031(4) 0.037(3) 0.001(3) 0.003(2) 0.001(3) 
C45 0.058(4) 0.032(4) 0.049(4) 0.007(3) 0.012(3) -0.003(3) 
C46 0.059(4) 0.033(4) 0.045(4) 0.009(3) 0.001(3) 0.006(3) 
C47 0.045(4) 0.040(4) 0.041(3) -0.001(3) -0.010(3) 0.010(3) 
C48 0.037(3) 0.031(4) 0.034(3) -0.002(3) -0.003(2) -0.001(2) 
C49 0.029(3) 0.056(5) 0.064(4) -0.003(4) -0.003(3) 0.009(3) 
C50 0.026(3) 0.033(4) 0.039(3) 0.001(3) 0.002(2) 0.001(2) 
C51 0.033(3) 0.036(4) 0.036(3) -0.001(3) -0.001(2) 0.003(3) 
C52 0.027(3) 0.031(4) 0.042(3) -0.001(3) -0.001(2) 0.003(2) 
C53 0.035(3) 0.034(4) 0.044(3) 0.004(3) 0.006(3) 0.005(3) 
C54 0.043(4) 0.032(4) 0.056(4) 0.009(3) 0.007(3) -0.001(3) 
C55 0.048(4) 0.030(4) 0.066(5) 0.007(3) 0.003(3) 0.002(3) 
C56 0.045(3) 0.029(4) 0.053(4) -0.006(3) 0.003(3) 0.000(3) 
C57 0.032(3) 0.038(4) 0.038(3) 0.000(3) 0.001(2) -0.002(3) 
C58 0.027(3) 0.037(4) 0.043(3) -0.001(3) 0.005(2) 0.004(2) 
C59 0.028(3) 0.050(5) 0.061(4) 0.010(4) -0.003(3) -0.003(3) 
C60 0.037(3) 0.035(4) 0.063(4) 0.008(3) -0.002(3) -0.002(3) 
C61 0.027(3) 0.040(4) 0.047(3) 0.007(3) 0.003(3) 0.009(3) 
C62 0.025(3) 0.043(4) 0.062(4) 0.011(3) -0.003(3) -0.002(3) 
C63 0.037(3) 0.027(4) 0.065(4) 0.002(3) 0.006(3) -0.002(3) 
C64 0.032(3) 0.053(5) 0.072(5) 0.016(4) -0.001(3) 0.005(3) 
C65 0.099(7) 0.046(6) 0.098(7) -0.022(5) -0.019(6) 0.000(5) 
C66 0.070(6) 0.099(10) 0.117(9) -0.029(8) -0.006(6) -0.009(6) 
Cl1 0.0554(11) 0.0654(16) 0.119(2) 0.0048(14) 0.0010(12) -0.0025(10) 
Cl2 0.0592(13) 0.098(2) 0.217(4) -0.083(3) -0.0240(18) 0.0144(14) 
Cl3 0.0519(11) 0.109(2) 0.0990(17) -0.0248(16) 0.0152(11) -0.0041(12) 
Cl4 0.0770(14) 0.0638(16) 0.0929(16) -0.0149(13) -0.0201(12) -0.0038(11) 
  
_geom_special_details 
; 
 All esds (except the esd in the dihedral angle between two l.s. planes) 
 are estimated using the full covariance matrix.  The cell esds are taken 
 into account individually in the estimation of esds in distances, angles 
 and torsion angles; correlations between esds in cell parameters are only 
 used when they are defined by crystal symmetry.  An approximate (isotropic) 
 treatment of cell esds is used for estimating esds involving l.s. planes. 
; 
  
loop_ 
 _geom_bond_atom_site_label_1 
 _geom_bond_atom_site_label_2 
 _geom_bond_distance 
 _geom_bond_site_symmetry_2 
 _geom_bond_publ_flag 
N1 C1 1.345(8) . ? 
N1 C26 1.443(8) . ? 
N1 H1A 0.8800 . ? 
N2 C10 1.370(8) . ? 
N2 C16 1.403(9) . ? 
N2 C17 1.444(9) . ? 
N3 C19 1.365(9) . ? 
N3 C25 1.369(9) . ? 
N3 H3A 0.8800 . ? 
N4 C33 1.337(8) . ? 
N4 C58 1.436(8) . ? 
N4 H4C 0.8800 . ? 
N5 C42 1.385(9) . ? 
N5 C48 1.395(8) . ? 
N5 C49 1.452(8) . ? 
N6 C51 1.364(9) . ? 
N6 C57 1.369(8) . ? 
N6 H6A 0.8800 . ? 
O1 C5 1.240(8) . ? 
O2 C10 1.217(7) . ? 
O3 C29 1.369(8) . ? 
O3 C32 1.428(8) . ? 
O4 C37 1.230(7) . ? 
O5 C42 1.211(8) . ? 
O6 C61 1.382(8) . ? 
O6 C64 1.422(8) . ? 
C1 C6 1.378(8) . ? 
C1 C2 1.491(9) . ? 
C2 C3 1.522(9) . ? 
C2 H2A 0.9900 . ? 
C2 H2B 0.9900 . ? 
C3 C4 1.502(9) . ? 
C3 C7 1.522(10) . ? 
C3 C8 1.522(9) . ? 
C4 C5 1.507(9) . ? 
C4 H4A 0.9900 . ? 
C4 H4B 0.9900 . ? 
C5 C6 1.445(9) . ? 
C6 C9 1.538(8) . ? 
C7 H7A 0.9800 . ? 
C7 H7B 0.9800 . ? 
C7 H7C 0.9800 . ? 
C8 H8A 0.9800 . ? 
C8 H8B 0.9800 . ? 
C8 H8C 0.9800 . ? 
C9 C11 1.505(8) . ? 
C9 C18 1.520(8) . ? 
C9 C10 1.555(8) . ? 
C11 C12 1.382(9) . ? 
C11 C16 1.391(10) . ? 
C12 C13 1.400(10) . ? 
C12 H12 0.9500 . ? 
C13 C14 1.388(12) . ? 
C13 H13 0.9500 . ? 
C14 C15 1.403(12) . ? 
C14 H14 0.9500 . ? 
C15 C16 1.382(10) . ? 
C15 H15 0.9500 . ? 
C17 H17A 0.9800 . ? 
C17 H17B 0.9800 . ? 
C17 H17C 0.9800 . ? 
C18 C19 1.375(9) . ? 
C18 C20 1.439(9) . ? 
C19 H19 0.9500 . ? 
C20 C25 1.382(10) . ? 
C20 C21 1.423(9) . ? 
C21 C22 1.388(10) . ? 
C21 H21 0.9500 . ? 
C22 C23 1.399(11) . ? 
C22 H22 0.9500 . ? 
C23 C24 1.371(11) . ? 
C23 H23 0.9500 . ? 
C24 C25 1.403(10) . ? 
C24 H24 0.9500 . ? 
C26 C27 1.373(8) . ? 
C26 C31 1.382(9) . ? 
C27 C28 1.406(9) . ? 
C27 H27 0.9500 . ? 
C28 C29 1.358(9) . ? 
C28 H28 0.9500 . ? 
C29 C30 1.400(8) . ? 
C30 C31 1.359(10) . ? 
C30 H30 0.9500 . ? 
C31 H31 0.9500 . ? 
C32 H32A 0.9800 . ? 
C32 H32B 0.9800 . ? 
C32 H32C 0.9800 . ? 
C33 C38 1.382(9) . ? 
C33 C34 1.527(9) . ? 
C34 C35 1.529(8) . ? 
C34 H34A 0.9900 . ? 
C34 H34B 0.9900 . ? 
C35 C39 1.524(9) . ? 
C35 C36 1.526(9) . ? 
C35 C40 1.529(10) . ? 
C36 C37 1.527(9) . ? 
C36 H36A 0.9900 . ? 
C36 H36B 0.9900 . ? 
C37 C38 1.433(8) . ? 
C38 C41 1.535(8) . ? 
C39 H39A 0.9800 . ? 
C39 H39B 0.9800 . ? 
C39 H39C 0.9800 . ? 
C40 H40A 0.9800 . ? 
C40 H40B 0.9800 . ? 
C40 H40C 0.9800 . ? 
C41 C43 1.518(8) . ? 
C41 C50 1.526(9) . ? 
C41 C42 1.558(7) . ? 
C43 C44 1.384(8) . ? 
C43 C48 1.400(9) . ? 
C44 C45 1.392(9) . ? 
C44 H44 0.9500 . ? 
C45 C46 1.379(10) . ? 
C45 H45 0.9500 . ? 
C46 C47 1.384(10) . ? 
C46 H46 0.9500 . ? 
C47 C48 1.384(9) . ? 
C47 H47 0.9500 . ? 
C49 H49A 0.9800 . ? 
C49 H49B 0.9800 . ? 
C49 H49C 0.9800 . ? 
C50 C51 1.360(8) . ? 
C50 C52 1.449(9) . ? 
C51 H51 0.9500 . ? 
C52 C53 1.399(9) . ? 
C52 C57 1.413(9) . ? 
C53 C54 1.366(10) . ? 
C53 H53 0.9500 . ? 
C54 C55 1.393(11) . ? 
C54 H54 0.9500 . ? 
C55 C56 1.370(10) . ? 
C55 H55 0.9500 . ? 
C56 C57 1.409(10) . ? 
C56 H56 0.9500 . ? 
C58 C63 1.372(9) . ? 
C58 C59 1.396(10) . ? 
C59 C60 1.370(10) . ? 
C59 H59 0.9500 . ? 
C60 C61 1.391(9) . ? 
C60 H60 0.9500 . ? 
C61 C62 1.374(10) . ? 
C62 C63 1.389(9) . ? 
C62 H62 0.9500 . ? 
C63 H63 0.9500 . ? 
C64 H64A 0.9800 . ? 
C64 H64B 0.9800 . ? 
C64 H64C 0.9800 . ? 
C65 Cl1 1.730(11) . ? 
C65 Cl2 1.738(12) . ? 
C65 H65A 0.9900 . ? 
C65 H65B 0.9900 . ? 
C66 Cl3 1.729(12) . ? 
C66 Cl4 1.760(12) . ? 
C66 H66A 0.9900 . ? 
C66 H66B 0.9900 . ? 
  
loop_ 
 _geom_angle_atom_site_label_1 
 _geom_angle_atom_site_label_2 
 _geom_angle_atom_site_label_3 
 _geom_angle 
 _geom_angle_site_symmetry_1 
 _geom_angle_site_symmetry_3 
 _geom_angle_publ_flag 
C1 N1 C26 125.3(5) . . ? 
C1 N1 H1A 117.4 . . ? 
C26 N1 H1A 117.4 . . ? 
C10 N2 C16 111.2(5) . . ? 
C10 N2 C17 123.6(6) . . ? 
C16 N2 C17 123.3(6) . . ? 
C19 N3 C25 107.7(6) . . ? 
C19 N3 H3A 126.1 . . ? 
C25 N3 H3A 126.1 . . ? 
C33 N4 C58 126.2(5) . . ? 
C33 N4 H4C 116.9 . . ? 
C58 N4 H4C 116.9 . . ? 
C42 N5 C48 110.6(5) . . ? 
C42 N5 C49 121.0(6) . . ? 
C48 N5 C49 123.8(6) . . ? 
C51 N6 C57 108.9(5) . . ? 
C51 N6 H6A 125.5 . . ? 
C57 N6 H6A 125.5 . . ? 
C29 O3 C32 117.2(5) . . ? 
C61 O6 C64 116.7(6) . . ? 
N1 C1 C6 122.8(6) . . ? 
N1 C1 C2 116.3(5) . . ? 
C6 C1 C2 120.9(6) . . ? 
C1 C2 C3 114.2(6) . . ? 
C1 C2 H2A 108.7 . . ? 
C3 C2 H2A 108.7 . . ? 
C1 C2 H2B 108.7 . . ? 
C3 C2 H2B 108.7 . . ? 
H2A C2 H2B 107.6 . . ? 
C4 C3 C7 110.1(6) . . ? 
C4 C3 C8 110.0(6) . . ? 
C7 C3 C8 109.2(6) . . ? 
C4 C3 C2 108.8(6) . . ? 
C7 C3 C2 108.7(6) . . ? 
C8 C3 C2 110.0(6) . . ? 
C3 C4 C5 115.4(6) . . ? 
C3 C4 H4A 108.4 . . ? 
C5 C4 H4A 108.4 . . ? 
C3 C4 H4B 108.4 . . ? 
C5 C4 H4B 108.4 . . ? 
H4A C4 H4B 107.5 . . ? 
O1 C5 C6 121.8(6) . . ? 
O1 C5 C4 118.1(6) . . ? 
C6 C5 C4 120.1(6) . . ? 
C1 C6 C5 118.3(5) . . ? 
C1 C6 C9 125.8(5) . . ? 
C5 C6 C9 115.4(5) . . ? 
C3 C7 H7A 109.5 . . ? 
C3 C7 H7B 109.5 . . ? 
H7A C7 H7B 109.5 . . ? 
C3 C7 H7C 109.5 . . ? 
H7A C7 H7C 109.5 . . ? 
H7B C7 H7C 109.5 . . ? 
C3 C8 H8A 109.5 . . ? 
C3 C8 H8B 109.5 . . ? 
H8A C8 H8B 109.5 . . ? 
C3 C8 H8C 109.5 . . ? 
H8A C8 H8C 109.5 . . ? 
H8B C8 H8C 109.5 . . ? 
C11 C9 C18 111.0(5) . . ? 
C11 C9 C6 114.9(5) . . ? 
C18 C9 C6 112.7(5) . . ? 
C11 C9 C10 101.5(5) . . ? 
C18 C9 C10 106.2(4) . . ? 
C6 C9 C10 109.6(5) . . ? 
O2 C10 N2 125.4(6) . . ? 
O2 C10 C9 126.5(6) . . ? 
N2 C10 C9 107.9(5) . . ? 
C12 C11 C16 119.9(6) . . ? 
C12 C11 C9 130.6(6) . . ? 
C16 C11 C9 109.4(5) . . ? 
C11 C12 C13 119.2(7) . . ? 
C11 C12 H12 120.4 . . ? 
C13 C12 H12 120.4 . . ? 
C14 C13 C12 119.8(7) . . ? 
C14 C13 H13 120.1 . . ? 
C12 C13 H13 120.1 . . ? 
C13 C14 C15 121.6(7) . . ? 
C13 C14 H14 119.2 . . ? 
C15 C14 H14 119.2 . . ? 
C16 C15 C14 117.1(7) . . ? 
C16 C15 H15 121.5 . . ? 
C14 C15 H15 121.5 . . ? 
C15 C16 C11 122.3(7) . . ? 
C15 C16 N2 128.0(7) . . ? 
C11 C16 N2 109.7(6) . . ? 
N2 C17 H17A 109.5 . . ? 
N2 C17 H17B 109.5 . . ? 
H17A C17 H17B 109.5 . . ? 
N2 C17 H17C 109.5 . . ? 
H17A C17 H17C 109.5 . . ? 
H17B C17 H17C 109.5 . . ? 
C19 C18 C20 105.4(6) . . ? 
C19 C18 C9 126.3(6) . . ? 
C20 C18 C9 128.3(5) . . ? 
N3 C19 C18 110.7(6) . . ? 
N3 C19 H19 124.6 . . ? 
C18 C19 H19 124.6 . . ? 
C25 C20 C21 119.2(6) . . ? 
C25 C20 C18 107.0(6) . . ? 
C21 C20 C18 133.7(6) . . ? 
C22 C21 C20 117.8(7) . . ? 
C22 C21 H21 121.1 . . ? 
C20 C21 H21 121.1 . . ? 
C21 C22 C23 121.4(7) . . ? 
C21 C22 H22 119.3 . . ? 
C23 C22 H22 119.3 . . ? 
C24 C23 C22 121.2(7) . . ? 
C24 C23 H23 119.4 . . ? 
C22 C23 H23 119.4 . . ? 
C23 C24 C25 117.6(7) . . ? 
C23 C24 H24 121.2 . . ? 
C25 C24 H24 121.2 . . ? 
N3 C25 C20 109.2(6) . . ? 
N3 C25 C24 128.2(7) . . ? 
C20 C25 C24 122.6(7) . . ? 
C27 C26 C31 120.7(6) . . ? 
C27 C26 N1 119.8(6) . . ? 
C31 C26 N1 119.5(5) . . ? 
C26 C27 C28 119.6(6) . . ? 
C26 C27 H27 120.2 . . ? 
C28 C27 H27 120.2 . . ? 
C29 C28 C27 119.6(5) . . ? 
C29 C28 H28 120.2 . . ? 
C27 C28 H28 120.2 . . ? 
C28 C29 O3 124.6(5) . . ? 
C28 C29 C30 119.8(6) . . ? 
O3 C29 C30 115.6(6) . . ? 
C31 C30 C29 120.9(6) . . ? 
C31 C30 H30 119.5 . . ? 
C29 C30 H30 119.5 . . ? 
C30 C31 C26 119.3(5) . . ? 
C30 C31 H31 120.3 . . ? 
C26 C31 H31 120.3 . . ? 
O3 C32 H32A 109.5 . . ? 
O3 C32 H32B 109.5 . . ? 
H32A C32 H32B 109.5 . . ? 
O3 C32 H32C 109.5 . . ? 
H32A C32 H32C 109.5 . . ? 
H32B C32 H32C 109.5 . . ? 
N4 C33 C38 123.8(6) . . ? 
N4 C33 C34 115.0(5) . . ? 
C38 C33 C34 121.2(5) . . ? 
C33 C34 C35 115.1(5) . . ? 
C33 C34 H34A 108.5 . . ? 
C35 C34 H34A 108.5 . . ? 
C33 C34 H34B 108.5 . . ? 
C35 C34 H34B 108.5 . . ? 
H34A C34 H34B 107.5 . . ? 
C39 C35 C36 111.1(6) . . ? 
C39 C35 C40 108.8(6) . . ? 
C36 C35 C40 108.3(6) . . ? 
C39 C35 C34 111.5(6) . . ? 
C36 C35 C34 107.7(5) . . ? 
C40 C35 C34 109.3(5) . . ? 
C35 C36 C37 112.3(6) . . ? 
C35 C36 H36A 109.1 . . ? 
C37 C36 H36A 109.1 . . ? 
C35 C36 H36B 109.1 . . ? 
C37 C36 H36B 109.1 . . ? 
H36A C36 H36B 107.9 . . ? 
O4 C37 C38 122.2(6) . . ? 
O4 C37 C36 118.6(6) . . ? 
C38 C37 C36 119.1(5) . . ? 
C33 C38 C37 119.7(6) . . ? 
C33 C38 C41 125.7(5) . . ? 
C37 C38 C41 114.2(5) . . ? 
C35 C39 H39A 109.5 . . ? 
C35 C39 H39B 109.5 . . ? 
H39A C39 H39B 109.5 . . ? 
C35 C39 H39C 109.5 . . ? 
H39A C39 H39C 109.5 . . ? 
H39B C39 H39C 109.5 . . ? 
C35 C40 H40A 109.5 . . ? 
C35 C40 H40B 109.5 . . ? 
H40A C40 H40B 109.5 . . ? 
C35 C40 H40C 109.5 . . ? 
H40A C40 H40C 109.5 . . ? 
H40B C40 H40C 109.5 . . ? 
C43 C41 C50 112.5(5) . . ? 
C43 C41 C38 112.1(5) . . ? 
C50 C41 C38 115.1(5) . . ? 
C43 C41 C42 100.3(5) . . ? 
C50 C41 C42 106.0(5) . . ? 
C38 C41 C42 109.5(5) . . ? 
O5 C42 N5 124.6(5) . . ? 
O5 C42 C41 127.1(6) . . ? 
N5 C42 C41 108.2(5) . . ? 
C44 C43 C48 119.7(6) . . ? 
C44 C43 C41 130.4(6) . . ? 
C48 C43 C41 109.9(5) . . ? 
C43 C44 C45 118.9(6) . . ? 
C43 C44 H44 120.6 . . ? 
C45 C44 H44 120.6 . . ? 
C46 C45 C44 120.0(7) . . ? 
C46 C45 H45 120.0 . . ? 
C44 C45 H45 120.0 . . ? 
C45 C46 C47 122.6(7) . . ? 
C45 C46 H46 118.7 . . ? 
C47 C46 H46 118.7 . . ? 
C46 C47 C48 116.7(6) . . ? 
C46 C47 H47 121.7 . . ? 
C48 C47 H47 121.7 . . ? 
C47 C48 N5 128.3(6) . . ? 
C47 C48 C43 122.2(6) . . ? 
N5 C48 C43 109.5(6) . . ? 
N5 C49 H49A 109.5 . . ? 
N5 C49 H49B 109.5 . . ? 
H49A C49 H49B 109.5 . . ? 
N5 C49 H49C 109.5 . . ? 
H49A C49 H49C 109.5 . . ? 
H49B C49 H49C 109.5 . . ? 
C51 C50 C52 106.8(6) . . ? 
C51 C50 C41 127.1(6) . . ? 
C52 C50 C41 126.0(5) . . ? 
C50 C51 N6 110.3(6) . . ? 
C50 C51 H51 124.9 . . ? 
N6 C51 H51 124.9 . . ? 
C53 C52 C57 118.9(6) . . ? 
C53 C52 C50 135.4(6) . . ? 
C57 C52 C50 105.6(5) . . ? 
C54 C53 C52 119.1(6) . . ? 
C54 C53 H53 120.4 . . ? 
C52 C53 H53 120.4 . . ? 
C53 C54 C55 121.5(7) . . ? 
C53 C54 H54 119.3 . . ? 
C55 C54 H54 119.3 . . ? 
C56 C55 C54 121.6(7) . . ? 
C56 C55 H55 119.2 . . ? 
C54 C55 H55 119.2 . . ? 
C55 C56 C57 117.3(6) . . ? 
C55 C56 H56 121.4 . . ? 
C57 C56 H56 121.4 . . ? 
N6 C57 C56 130.2(6) . . ? 
N6 C57 C52 108.3(6) . . ? 
C56 C57 C52 121.5(6) . . ? 
C63 C58 C59 119.2(6) . . ? 
C63 C58 N4 121.0(6) . . ? 
C59 C58 N4 119.8(6) . . ? 
C60 C59 C58 119.7(6) . . ? 
C60 C59 H59 120.1 . . ? 
C58 C59 H59 120.1 . . ? 
C59 C60 C61 120.7(7) . . ? 
C59 C60 H60 119.6 . . ? 
C61 C60 H60 119.6 . . ? 
C62 C61 O6 124.7(6) . . ? 
C62 C61 C60 119.8(6) . . ? 
O6 C61 C60 115.4(6) . . ? 
C61 C62 C63 119.2(6) . . ? 
C61 C62 H62 120.4 . . ? 
C63 C62 H62 120.4 . . ? 
C58 C63 C62 121.2(7) . . ? 
C58 C63 H63 119.4 . . ? 
C62 C63 H63 119.4 . . ? 
O6 C64 H64A 109.5 . . ? 
O6 C64 H64B 109.5 . . ? 
H64A C64 H64B 109.5 . . ? 
O6 C64 H64C 109.5 . . ? 
H64A C64 H64C 109.5 . . ? 
H64B C64 H64C 109.5 . . ? 
Cl1 C65 Cl2 111.7(7) . . ? 
Cl1 C65 H65A 109.3 . . ? 
Cl2 C65 H65A 109.3 . . ? 
Cl1 C65 H65B 109.3 . . ? 
Cl2 C65 H65B 109.3 . . ? 
H65A C65 H65B 107.9 . . ? 
Cl3 C66 Cl4 114.5(6) . . ? 
Cl3 C66 H66A 108.6 . . ? 
Cl4 C66 H66A 108.6 . . ? 
Cl3 C66 H66B 108.6 . . ? 
Cl4 C66 H66B 108.6 . . ? 
H66A C66 H66B 107.6 . . ? 
  
loop_ 
 _geom_torsion_atom_site_label_1 
 _geom_torsion_atom_site_label_2 
 _geom_torsion_atom_site_label_3 
 _geom_torsion_atom_site_label_4 
 _geom_torsion 
 _geom_torsion_site_symmetry_1 
 _geom_torsion_site_symmetry_2 
 _geom_torsion_site_symmetry_3 
 _geom_torsion_site_symmetry_4 
 _geom_torsion_publ_flag 
C26 N1 C1 C6 173.4(5) . . . . ? 
C26 N1 C1 C2 -4.0(9) . . . . ? 
N1 C1 C2 C3 -144.3(6) . . . . ? 
C6 C1 C2 C3 38.2(8) . . . . ? 
C1 C2 C3 C4 -50.1(8) . . . . ? 
C1 C2 C3 C7 69.9(7) . . . . ? 
C1 C2 C3 C8 -170.6(5) . . . . ? 
C7 C3 C4 C5 -73.2(8) . . . . ? 
C8 C3 C4 C5 166.4(7) . . . . ? 
C2 C3 C4 C5 45.9(9) . . . . ? 
C3 C4 C5 O1 151.1(6) . . . . ? 
C3 C4 C5 C6 -29.1(10) . . . . ? 
N1 C1 C6 C5 164.4(6) . . . . ? 
C2 C1 C6 C5 -18.2(9) . . . . ? 
N1 C1 C6 C9 -7.1(9) . . . . ? 
C2 C1 C6 C9 170.2(6) . . . . ? 
O1 C5 C6 C1 -166.8(6) . . . . ? 
C4 C5 C6 C1 13.4(9) . . . . ? 
O1 C5 C6 C9 5.6(8) . . . . ? 
C4 C5 C6 C9 -174.2(6) . . . . ? 
C1 C6 C9 C11 94.5(7) . . . . ? 
C5 C6 C9 C11 -77.3(7) . . . . ? 
C1 C6 C9 C18 -34.0(8) . . . . ? 
C5 C6 C9 C18 154.2(5) . . . . ? 
C1 C6 C9 C10 -152.1(6) . . . . ? 
C5 C6 C9 C10 36.1(7) . . . . ? 
C16 N2 C10 O2 -179.0(6) . . . . ? 
C17 N2 C10 O2 -14.5(10) . . . . ? 
C16 N2 C10 C9 5.0(7) . . . . ? 
C17 N2 C10 C9 169.5(6) . . . . ? 
C11 C9 C10 O2 179.4(6) . . . . ? 
C18 C9 C10 O2 -64.5(8) . . . . ? 
C6 C9 C10 O2 57.5(8) . . . . ? 
C11 C9 C10 N2 -4.7(6) . . . . ? 
C18 C9 C10 N2 111.4(5) . . . . ? 
C6 C9 C10 N2 -126.6(5) . . . . ? 
C18 C9 C11 C12 69.1(8) . . . . ? 
C6 C9 C11 C12 -60.3(9) . . . . ? 
C10 C9 C11 C12 -178.4(7) . . . . ? 
C18 C9 C11 C16 -109.7(6) . . . . ? 
C6 C9 C11 C16 121.0(6) . . . . ? 
C10 C9 C11 C16 2.9(6) . . . . ? 
C16 C11 C12 C13 0.8(10) . . . . ? 
C9 C11 C12 C13 -177.8(6) . . . . ? 
C11 C12 C13 C14 -1.0(11) . . . . ? 
C12 C13 C14 C15 -1.2(12) . . . . ? 
C13 C14 C15 C16 3.3(11) . . . . ? 
C14 C15 C16 C11 -3.5(11) . . . . ? 
C14 C15 C16 N2 177.1(7) . . . . ? 
C12 C11 C16 C15 1.5(10) . . . . ? 
C9 C11 C16 C15 -179.6(6) . . . . ? 
C12 C11 C16 N2 -179.0(6) . . . . ? 
C9 C11 C16 N2 -0.1(7) . . . . ? 
C10 N2 C16 C15 176.3(7) . . . . ? 
C17 N2 C16 C15 11.7(11) . . . . ? 
C10 N2 C16 C11 -3.2(8) . . . . ? 
C17 N2 C16 C11 -167.8(6) . . . . ? 
C11 C9 C18 C19 0.9(8) . . . . ? 
C6 C9 C18 C19 131.4(6) . . . . ? 
C10 C9 C18 C19 -108.6(6) . . . . ? 
C11 C9 C18 C20 -175.3(6) . . . . ? 
C6 C9 C18 C20 -44.8(8) . . . . ? 
C10 C9 C18 C20 75.2(7) . . . . ? 
C25 N3 C19 C18 0.3(7) . . . . ? 
C20 C18 C19 N3 0.8(7) . . . . ? 
C9 C18 C19 N3 -176.1(5) . . . . ? 
C19 C18 C20 C25 -1.6(6) . . . . ? 
C9 C18 C20 C25 175.3(5) . . . . ? 
C19 C18 C20 C21 -178.8(6) . . . . ? 
C9 C18 C20 C21 -1.9(10) . . . . ? 
C25 C20 C21 C22 -2.3(8) . . . . ? 
C18 C20 C21 C22 174.7(6) . . . . ? 
C20 C21 C22 C23 2.2(9) . . . . ? 
C21 C22 C23 C24 -1.4(10) . . . . ? 
C22 C23 C24 C25 0.6(9) . . . . ? 
C19 N3 C25 C20 -1.3(7) . . . . ? 
C19 N3 C25 C24 176.5(6) . . . . ? 
C21 C20 C25 N3 179.4(5) . . . . ? 
C18 C20 C25 N3 1.8(6) . . . . ? 
C21 C20 C25 C24 1.5(9) . . . . ? 
C18 C20 C25 C24 -176.2(5) . . . . ? 
C23 C24 C25 N3 -178.2(6) . . . . ? 
C23 C24 C25 C20 -0.6(9) . . . . ? 
C1 N1 C26 C27 87.5(8) . . . . ? 
C1 N1 C26 C31 -94.3(8) . . . . ? 
C31 C26 C27 C28 1.8(11) . . . . ? 
N1 C26 C27 C28 180.0(6) . . . . ? 
C26 C27 C28 C29 -0.7(11) . . . . ? 
C27 C28 C29 O3 -179.1(7) . . . . ? 
C27 C28 C29 C30 -0.1(11) . . . . ? 
C32 O3 C29 C28 -1.8(11) . . . . ? 
C32 O3 C29 C30 179.1(7) . . . . ? 
C28 C29 C30 C31 -0.2(12) . . . . ? 
O3 C29 C30 C31 178.8(7) . . . . ? 
C29 C30 C31 C26 1.3(12) . . . . ? 
C27 C26 C31 C30 -2.1(11) . . . . ? 
N1 C26 C31 C30 179.7(7) . . . . ? 
C58 N4 C33 C38 165.5(6) . . . . ? 
C58 N4 C33 C34 -18.1(9) . . . . ? 
N4 C33 C34 C35 171.6(6) . . . . ? 
C38 C33 C34 C35 -11.9(9) . . . . ? 
C33 C34 C35 C39 -76.4(7) . . . . ? 
C33 C34 C35 C36 45.8(8) . . . . ? 
C33 C34 C35 C40 163.2(6) . . . . ? 
C39 C35 C36 C37 66.7(7) . . . . ? 
C40 C35 C36 C37 -173.8(5) . . . . ? 
C34 C35 C36 C37 -55.8(7) . . . . ? 
C35 C36 C37 O4 -150.9(5) . . . . ? 
C35 C36 C37 C38 33.6(8) . . . . ? 
N4 C33 C38 C37 162.0(6) . . . . ? 
C34 C33 C38 C37 -14.2(9) . . . . ? 
N4 C33 C38 C41 -10.5(10) . . . . ? 
C34 C33 C38 C41 173.2(6) . . . . ? 
O4 C37 C38 C33 -172.3(6) . . . . ? 
C36 C37 C38 C33 3.0(9) . . . . ? 
O4 C37 C38 C41 1.1(9) . . . . ? 
C36 C37 C38 C41 176.4(5) . . . . ? 
C33 C38 C41 C43 104.7(7) . . . . ? 
C37 C38 C41 C43 -68.2(6) . . . . ? 
C33 C38 C41 C50 -25.6(9) . . . . ? 
C37 C38 C41 C50 161.5(5) . . . . ? 
C33 C38 C41 C42 -144.9(6) . . . . ? 
C37 C38 C41 C42 42.2(7) . . . . ? 
C48 N5 C42 O5 -170.6(6) . . . . ? 
C49 N5 C42 O5 -13.7(10) . . . . ? 
C48 N5 C42 C41 12.5(7) . . . . ? 
C49 N5 C42 C41 169.5(6) . . . . ? 
C43 C41 C42 O5 173.8(6) . . . . ? 
C50 C41 C42 O5 -68.9(8) . . . . ? 
C38 C41 C42 O5 55.8(9) . . . . ? 
C43 C41 C42 N5 -9.4(6) . . . . ? 
C50 C41 C42 N5 107.8(6) . . . . ? 
C38 C41 C42 N5 -127.4(6) . . . . ? 
C50 C41 C43 C44 74.4(8) . . . . ? 
C38 C41 C43 C44 -57.2(8) . . . . ? 
C42 C41 C43 C44 -173.3(6) . . . . ? 
C50 C41 C43 C48 -108.9(6) . . . . ? 
C38 C41 C43 C48 119.5(5) . . . . ? 
C42 C41 C43 C48 3.3(6) . . . . ? 
C48 C43 C44 C45 -1.7(9) . . . . ? 
C41 C43 C44 C45 174.7(6) . . . . ? 
C43 C44 C45 C46 0.8(10) . . . . ? 
C44 C45 C46 C47 0.6(11) . . . . ? 
C45 C46 C47 C48 -1.0(11) . . . . ? 
C46 C47 C48 N5 -179.4(6) . . . . ? 
C46 C47 C48 C43 0.1(10) . . . . ? 
C42 N5 C48 C47 169.1(6) . . . . ? 
C49 N5 C48 C47 12.9(10) . . . . ? 
C42 N5 C48 C43 -10.4(7) . . . . ? 
C49 N5 C48 C43 -166.6(6) . . . . ? 
C44 C43 C48 C47 1.3(9) . . . . ? 
C41 C43 C48 C47 -175.8(6) . . . . ? 
C44 C43 C48 N5 -179.1(5) . . . . ? 
C41 C43 C48 N5 3.8(7) . . . . ? 
C43 C41 C50 C51 -8.0(8) . . . . ? 
C38 C41 C50 C51 122.0(7) . . . . ? 
C42 C41 C50 C51 -116.7(7) . . . . ? 
C43 C41 C50 C52 175.0(5) . . . . ? 
C38 C41 C50 C52 -55.0(7) . . . . ? 
C42 C41 C50 C52 66.3(7) . . . . ? 
C52 C50 C51 N6 -1.3(7) . . . . ? 
C41 C50 C51 N6 -178.8(5) . . . . ? 
C57 N6 C51 C50 1.4(7) . . . . ? 
C51 C50 C52 C53 -176.2(7) . . . . ? 
C41 C50 C52 C53 1.3(11) . . . . ? 
C51 C50 C52 C57 0.8(7) . . . . ? 
C41 C50 C52 C57 178.2(5) . . . . ? 
C57 C52 C53 C54 -0.4(9) . . . . ? 
C50 C52 C53 C54 176.3(7) . . . . ? 
C52 C53 C54 C55 2.0(10) . . . . ? 
C53 C54 C55 C56 -1.7(11) . . . . ? 
C54 C55 C56 C57 -0.4(11) . . . . ? 
C51 N6 C57 C56 178.4(6) . . . . ? 
C51 N6 C57 C52 -0.9(7) . . . . ? 
C55 C56 C57 N6 -177.2(7) . . . . ? 
C55 C56 C57 C52 2.0(10) . . . . ? 
C53 C52 C57 N6 177.7(5) . . . . ? 
C50 C52 C57 N6 0.1(7) . . . . ? 
C53 C52 C57 C56 -1.7(9) . . . . ? 
C50 C52 C57 C56 -179.3(6) . . . . ? 
C33 N4 C58 C63 93.6(8) . . . . ? 
C33 N4 C58 C59 -88.9(9) . . . . ? 
C63 C58 C59 C60 -0.4(11) . . . . ? 
N4 C58 C59 C60 -177.9(6) . . . . ? 
C58 C59 C60 C61 0.1(12) . . . . ? 
C64 O6 C61 C62 -3.8(10) . . . . ? 
C64 O6 C61 C60 176.0(6) . . . . ? 
C59 C60 C61 C62 -0.6(11) . . . . ? 
C59 C60 C61 O6 179.7(7) . . . . ? 
O6 C61 C62 C63 -178.9(7) . . . . ? 
C60 C61 C62 C63 1.3(11) . . . . ? 
C59 C58 C63 C62 1.2(11) . . . . ? 
N4 C58 C63 C62 178.7(6) . . . . ? 
C61 C62 C63 C58 -1.7(11) . . . . ? 
  
loop_ 
 _geom_hbond_atom_site_label_D 
 _geom_hbond_atom_site_label_H 
 _geom_hbond_atom_site_label_A 
 _geom_hbond_distance_DH 
 _geom_hbond_distance_HA 
 _geom_hbond_distance_DA 
 _geom_hbond_angle_DHA 
 _geom_hbond_site_symmetry_A 
C32 H32B Cl2  0.98 2.95 3.844(8) 152.7 2_646 
C64 H64C O5  0.98 2.49 3.298(9) 139.8 1_455 
C65 H65B O4  0.99 2.16 3.053(11) 149.2 2_756 
  
_refine_diff_density_max    0.311 
_refine_diff_density_min   -0.533 
_refine_diff_density_rms    0.065 
  
_shelxl_version_number 2013-4 
  
_shelx_res_file 
; 
TITL cu_dm14205_0m in P2(1) 
CELL 1.54178 11.7883 17.9576 14.1225 90.000 90.594 90.000 
ZERR 4.00 0.0006 0.0009 0.0007 0.000 0.004 0.000 
LATT -1 
SYMM -x, y+1/2, -z 
SFAC C  H  N  O  Cl 
UNIT 132 132 12 12 8 
L.S. 4 
ACTA 
BOND $H 
FMAP 2 
wpdb -1 
conf 
htab 
PLAN -5 
SIZE 0.020 0.080 0.200 
TEMP -133 
  
REM Instructions for potential hydrogen bonds 
EQIV $1 -x+1, y-1/2, -z+1 
HTAB C32 Cl2_$1 
EQIV $2 x-1, y, z 
HTAB C64 O5_$2 
EQIV $3 -x+2, y+1/2, -z+1 
HTAB C65 O4_$3 
WGHT    0.096600    0.320600 
FVAR       0.13886 
N1    3    0.416430    0.188941    0.185577    11.00000    0.04348    0.02621 = 
         0.03627    0.00220    0.00614   -0.00192 
AFIX  43 
H1A   2    0.405312    0.172089    0.127710    11.00000   -1.20000 
AFIX   0 
N2    3    0.525588    0.353389   -0.117641    11.00000    0.04605    0.02511 = 
         0.03566    0.00115    0.00324   -0.00288 
N3    3    0.543433    0.076207   -0.031327    11.00000    0.05535    0.01538 = 
         0.05055   -0.00468    0.00733   -0.00116 
AFIX  43 
H3A   2    0.528176    0.033326   -0.058799    11.00000   -1.20000 
AFIX   0 
N4    3    0.719939    0.125303    0.696734    11.00000    0.02865    0.04383 = 
         0.03638    0.00197   -0.00047    0.00556 
AFIX  43 
H4C   2    0.733479    0.124386    0.758118    11.00000   -1.20000 
AFIX   0 
N5    3    1.137864    0.041320    0.818893    11.00000    0.02610    0.04156 = 
         0.04426   -0.00396   -0.00177    0.00330 
N6    3    0.854030    0.243915    0.906105    11.00000    0.03720    0.03377 = 
         0.04245   -0.00914    0.00622    0.00147 
AFIX  43 
H6A   2    0.826106    0.264639    0.957294    11.00000   -1.20000 
AFIX   0 
O1    4    0.493658    0.427015    0.065018    11.00000    0.05703    0.02452 = 
         0.04474    0.00256    0.01212    0.00317 
O2    4    0.676253    0.336713   -0.014960    11.00000    0.03791    0.02796 = 
         0.04712    0.00058    0.00983   -0.00038 
O3    4    0.345414   -0.010189    0.480872    11.00000    0.04788    0.06098 = 
         0.05966    0.03124    0.01515    0.00843 
O4    4    1.039484   -0.025844    0.649411    11.00000    0.03344    0.03407 = 
         0.04355    0.00027    0.00570    0.00562 
O5    4    1.135494    0.124083    0.694589    11.00000    0.03496    0.03612 = 
         0.05192    0.00280    0.01242    0.00140 
O6    4    0.348008    0.296836    0.581795    11.00000    0.03361    0.04288 = 
         0.06094    0.01314   -0.00178    0.00356 
C1    1    0.451240    0.259939    0.194957    11.00000    0.03001    0.02535 = 
         0.03669   -0.00033    0.00147   -0.00118 
C2    1    0.461827    0.288720    0.293677    11.00000    0.04606    0.03274 = 
         0.03961    0.00241    0.00813   -0.00342 
AFIX  23 
H2A   2    0.541236    0.282140    0.315602    11.00000   -1.20000 
H2B   2    0.412970    0.258412    0.335278    11.00000   -1.20000 
AFIX   0 
C3    1    0.429403    0.370302    0.304585    11.00000    0.04958    0.02333 = 
         0.04044   -0.00083    0.00479   -0.00415 
C4    1    0.490712    0.415119    0.231347    11.00000    0.07443    0.02991 = 
         0.04149   -0.00337    0.01114   -0.01471 
AFIX  23 
H4A   2    0.570868    0.420521    0.251810    11.00000   -1.20000 
H4B   2    0.457047    0.465605    0.229206    11.00000   -1.20000 
AFIX   0 
C5    1    0.488284    0.383218    0.132666    11.00000    0.03363    0.03318 = 
         0.03845   -0.00206    0.00775   -0.00384 
C6    1    0.480268    0.303676    0.118759    11.00000    0.03397    0.02196 = 
         0.03709    0.00160    0.00774    0.00175 
C7    1    0.301771    0.377754    0.290308    11.00000    0.05094    0.05375 = 
         0.05645   -0.00502    0.00869    0.01846 
AFIX 137 
H7A   2    0.279993    0.430225    0.295900    11.00000   -1.50000 
H7B   2    0.262576    0.348513    0.338575    11.00000   -1.50000 
H7C   2    0.280555    0.359323    0.227255    11.00000   -1.50000 
AFIX   0 
C8    1    0.461536    0.397529    0.403339    11.00000    0.06679    0.03801 = 
         0.04205   -0.00319    0.00436   -0.00932 
AFIX 137 
H8A   2    0.539439    0.382226    0.418459    11.00000   -1.50000 
H8B   2    0.409667    0.375928    0.449652    11.00000   -1.50000 
H8C   2    0.456190    0.451961    0.405490    11.00000   -1.50000 
AFIX   0 
C9    1    0.490355    0.277117    0.015620    11.00000    0.03375    0.02222 = 
         0.03283   -0.00234    0.00327    0.00357 
C10   1    0.577402    0.326676   -0.037279    11.00000    0.03951    0.02414 = 
         0.03549   -0.00487    0.00658   -0.00285 
C11   1    0.385304    0.287967   -0.044325    11.00000    0.03466    0.02717 = 
         0.04322   -0.00439    0.00084    0.00533 
C12   1    0.276816    0.260131   -0.034110    11.00000    0.03451    0.02910 = 
         0.05826   -0.00312    0.00516    0.00007 
AFIX  43 
H12   2    0.258587    0.229907    0.018803    11.00000   -1.20000 
AFIX   0 
C13   1    0.194091    0.276998   -0.102660    11.00000    0.03918    0.04855 = 
         0.06772   -0.01575   -0.00823    0.00781 
AFIX  43 
H13   2    0.119484    0.257612   -0.097013    11.00000   -1.20000 
AFIX   0 
C14   1    0.221410    0.322135   -0.178904    11.00000    0.05594    0.05858 = 
         0.04865   -0.01298   -0.01355    0.01356 
AFIX  43 
H14   2    0.165110    0.332512   -0.225681    11.00000   -1.20000 
AFIX   0 
C15   1    0.330108    0.352786   -0.188549    11.00000    0.06263    0.04859 = 
         0.03647   -0.00260   -0.00836    0.01101 
AFIX  43 
H15   2    0.347540    0.385720   -0.238990    11.00000   -1.20000 
AFIX   0 
C16   1    0.410712    0.332965   -0.121452    11.00000    0.04689    0.04159 = 
         0.03566   -0.00753   -0.00174    0.00574 
C17   1    0.573583    0.410863   -0.176487    11.00000    0.06830    0.04851 = 
         0.04894    0.01768    0.01432   -0.00157 
AFIX 137 
H17A  2    0.654416    0.416511   -0.161237    11.00000   -1.50000 
H17B  2    0.534344    0.458050   -0.164888    11.00000   -1.50000 
H17C  2    0.564558    0.397028   -0.243267    11.00000   -1.50000 
AFIX   0 
C18   1    0.533790    0.197656    0.008189    11.00000    0.03606    0.02126 = 
         0.03320    0.00127    0.00447   -0.00260 
C19   1    0.487205    0.141713   -0.046135    11.00000    0.04839    0.02830 = 
         0.03992   -0.00641    0.00457   -0.00061 
AFIX  43 
H19   2    0.424488    0.147808   -0.088207    11.00000   -1.20000 
AFIX   0 
C20   1    0.626631    0.163590    0.059062    11.00000    0.03742    0.02625 = 
         0.03784   -0.00090    0.00862    0.00425 
C21   1    0.706747    0.190110    0.127114    11.00000    0.03247    0.03657 = 
         0.04287    0.00240    0.00827    0.00037 
AFIX  43 
H21   2    0.709684    0.241273    0.144072    11.00000   -1.20000 
AFIX   0 
C22   1    0.780507    0.138785    0.167942    11.00000    0.03546    0.05096 = 
         0.04736    0.00090    0.00138    0.00240 
AFIX  43 
H22   2    0.832892    0.154926    0.215214    11.00000   -1.20000 
AFIX   0 
C23   1    0.779381    0.063832    0.140997    11.00000    0.04555    0.03528 = 
         0.05968    0.01315    0.01761    0.01238 
AFIX  43 
H23   2    0.832126    0.030339    0.169258    11.00000   -1.20000 
AFIX   0 
C24   1    0.703593    0.037796    0.074575    11.00000    0.05099    0.03439 = 
         0.05167    0.00447    0.01909    0.01243 
AFIX  43 
H24   2    0.702412   -0.013202    0.056704    11.00000   -1.20000 
AFIX   0 
C25   1    0.627834    0.089209    0.033950    11.00000    0.04001    0.03583 = 
         0.03759    0.00512    0.01259    0.00416 
C26   1    0.395862    0.138209    0.262729    11.00000    0.03616    0.02540 = 
         0.03854    0.00157    0.00511   -0.00844 
C27   1    0.291084    0.136367    0.304201    11.00000    0.03677    0.03692 = 
         0.05160    0.01039    0.00871    0.00599 
AFIX  43 
H27   2    0.232291    0.168379    0.282245    11.00000   -1.20000 
AFIX   0 
C28   1    0.271265    0.086842    0.379352    11.00000    0.03569    0.04505 = 
         0.04510    0.01086    0.01419   -0.00558 
AFIX  43 
H28   2    0.199272    0.085582    0.408921    11.00000   -1.20000 
AFIX   0 
C29   1    0.355671    0.040818    0.409410    11.00000    0.03214    0.03945 = 
         0.03936    0.00440    0.00859    0.00391 
C30   1    0.461436    0.042999    0.365328    11.00000    0.03501    0.05940 = 
         0.04498    0.01585    0.00663    0.00598 
AFIX  43 
H30   2    0.520334    0.010838    0.386718    11.00000   -1.20000 
AFIX   0 
C31   1    0.481051    0.090485    0.292347    11.00000    0.03137    0.04385 = 
         0.04374    0.00446    0.00619    0.00519 
AFIX  43 
H31   2    0.552604    0.090855    0.262015    11.00000   -1.20000 
AFIX   0 
C32   1    0.239166   -0.013312    0.528423    11.00000    0.05695    0.05235 = 
         0.05099    0.01907    0.02027   -0.00228 
AFIX 137 
H32A  2    0.222144    0.035578    0.555639    11.00000   -1.50000 
H32B  2    0.243256   -0.050531    0.579093    11.00000   -1.50000 
H32C  2    0.179204   -0.027125    0.483161    11.00000   -1.50000 
AFIX   0 
C33   1    0.791535    0.087497    0.641884    11.00000    0.03242    0.02674 = 
         0.03948   -0.00269    0.00563    0.00262 
C34   1    0.746804    0.070185    0.542439    11.00000    0.03209    0.04636 = 
         0.03671    0.00562    0.00123    0.00371 
AFIX  23 
H34A  2    0.716777    0.116732    0.514198    11.00000   -1.20000 
H34B  2    0.682663    0.034896    0.547759    11.00000   -1.20000 
AFIX   0 
C35   1    0.834002    0.037073    0.474994    11.00000    0.03499    0.04713 = 
         0.03245    0.00374    0.00246   -0.00168 
C36   1    0.898149   -0.023987    0.528342    11.00000    0.03785    0.03695 = 
         0.03758   -0.00404    0.00344    0.00419 
AFIX  23 
H36A  2    0.958032   -0.044379    0.487104    11.00000   -1.20000 
H36B  2    0.845059   -0.064950    0.543293    11.00000   -1.20000 
AFIX   0 
C37   1    0.952401    0.004479    0.620066    11.00000    0.02972    0.02978 = 
         0.03983    0.00222    0.00615    0.00114 
C38   1    0.896059    0.061604    0.672512    11.00000    0.03176    0.03095 = 
         0.03702   -0.00048    0.00361   -0.00171 
C39   1    0.914981    0.096357    0.438377    11.00000    0.04807    0.05831 = 
         0.04460    0.00863    0.00882   -0.00257 
AFIX 137 
H39A  2    0.967454    0.073785    0.393297    11.00000   -1.50000 
H39B  2    0.958086    0.117596    0.491585    11.00000   -1.50000 
H39C  2    0.871478    0.135814    0.406700    11.00000   -1.50000 
AFIX   0 
C40   1    0.772305    0.001519    0.390662    11.00000    0.04457    0.06236 = 
         0.04119   -0.00099   -0.00031    0.00423 
AFIX 137 
H40A  2    0.732440    0.040173    0.354367    11.00000   -1.50000 
H40B  2    0.717405   -0.035100    0.413587    11.00000   -1.50000 
H40C  2    0.827518   -0.023309    0.349971    11.00000   -1.50000 
AFIX   0 
C41   1    0.955022    0.082028    0.766408    11.00000    0.02415    0.02567 = 
         0.03641    0.00198    0.00161    0.00166 
C42   1    1.085639    0.086114    0.751557    11.00000    0.02939    0.02945 = 
         0.04611   -0.00276    0.00384    0.00058 
C43   1    0.948803    0.019305    0.838268    11.00000    0.03560    0.01826 = 
         0.03528   -0.00271    0.00549   -0.00104 
C44   1    0.855857   -0.017161    0.875361    11.00000    0.03673    0.03126 = 
         0.03674    0.00079    0.00319    0.00108 
AFIX  43 
H44   2    0.781033   -0.001149    0.860218    11.00000   -1.20000 
AFIX   0 
C45   1    0.873862   -0.077705    0.935242    11.00000    0.05809    0.03181 = 
         0.04878    0.00728    0.01158   -0.00270 
AFIX  43 
H45   2    0.811027   -0.103767    0.960702    11.00000   -1.20000 
AFIX   0 
C46   1    0.982946   -0.099844    0.957599    11.00000    0.05863    0.03345 = 
         0.04498    0.00922    0.00116    0.00627 
AFIX  43 
H46   2    0.993415   -0.141580    0.998091    11.00000   -1.20000 
AFIX   0 
C47   1    1.077734   -0.063674    0.923386    11.00000    0.04524    0.04046 = 
         0.04056   -0.00093   -0.01044    0.01027 
AFIX  43 
H47   2    1.152362   -0.079079    0.940197    11.00000   -1.20000 
AFIX   0 
C48   1    1.058357   -0.003922    0.863439    11.00000    0.03728    0.03088 = 
         0.03405   -0.00248   -0.00323   -0.00124 
C49   1    1.257772    0.023668    0.813319    11.00000    0.02900    0.05562 = 
         0.06419   -0.00267   -0.00331    0.00883 
AFIX 137 
H49A  2    1.267627   -0.022364    0.777050    11.00000   -1.50000 
H49B  2    1.288991    0.016977    0.877338    11.00000   -1.50000 
H49C  2    1.297652    0.064474    0.781805    11.00000   -1.50000 
AFIX   0 
C50   1    0.920849    0.157053    0.808021    11.00000    0.02574    0.03261 = 
         0.03876    0.00063    0.00190    0.00085 
C51   1    0.875535    0.169858    0.894689    11.00000    0.03274    0.03587 = 
         0.03592   -0.00130   -0.00120    0.00317 
AFIX  43 
H51   2    0.860955    0.132555    0.940683    11.00000   -1.20000 
AFIX   0 
C52   1    0.926050    0.228311    0.760143    11.00000    0.02707    0.03068 = 
         0.04203   -0.00144   -0.00057    0.00292 
C53   1    0.957658    0.252539    0.670022    11.00000    0.03472    0.03439 = 
         0.04360    0.00432    0.00613    0.00524 
AFIX  43 
H53   2    0.987273    0.218324    0.625321    11.00000   -1.20000 
AFIX   0 
C54   1    0.945379    0.326030    0.647153    11.00000    0.04309    0.03235 = 
         0.05602    0.00869    0.00661   -0.00108 
AFIX  43 
H54   2    0.964485    0.342286    0.585322    11.00000   -1.20000 
AFIX   0 
C55   1    0.905479    0.377675    0.712435    11.00000    0.04836    0.02965 = 
         0.06562    0.00699    0.00345    0.00248 
AFIX  43 
H55   2    0.899965    0.428566    0.694597    11.00000   -1.20000 
AFIX   0 
C56   1    0.873984    0.356894    0.801753    11.00000    0.04460    0.02932 = 
         0.05317   -0.00556    0.00280    0.00025 
AFIX  43 
H56   2    0.847215    0.392344    0.846174    11.00000   -1.20000 
AFIX   0 
C57   1    0.882923    0.280779    0.825030    11.00000    0.03183    0.03771 = 
         0.03756   -0.00037    0.00066   -0.00215 
C58   1    0.623070    0.167259    0.665077    11.00000    0.02679    0.03729 = 
         0.04273   -0.00064    0.00533    0.00424 
C59   1    0.635501    0.242214    0.641085    11.00000    0.02786    0.05030 = 
         0.06085    0.00994   -0.00322   -0.00328 
AFIX  43 
H59   2    0.708229    0.264955    0.643681    11.00000   -1.20000 
AFIX   0 
C60   1    0.542391    0.282840    0.613782    11.00000    0.03743    0.03485 = 
         0.06288    0.00774   -0.00189   -0.00188 
AFIX  43 
H60   2    0.550980    0.333820    0.597382    11.00000   -1.20000 
AFIX   0 
C61   1    0.435420    0.250239    0.609818    11.00000    0.02688    0.03987 = 
         0.04725    0.00705    0.00321    0.00933 
C62   1    0.422757    0.176333    0.632703    11.00000    0.02486    0.04285 = 
         0.06182    0.01114   -0.00255   -0.00222 
AFIX  43 
H62   2    0.350252    0.153370    0.628901    11.00000   -1.20000 
AFIX   0 
C63   1    0.517196    0.135592    0.661458    11.00000    0.03670    0.02682 = 
         0.06515    0.00223    0.00559   -0.00154 
AFIX  43 
H63   2    0.508296    0.084860    0.678943    11.00000   -1.20000 
AFIX   0 
C64   1    0.238989    0.263852    0.571046    11.00000    0.03203    0.05346 = 
         0.07235    0.01589   -0.00086    0.00477 
AFIX 137 
H64A  2    0.241948    0.224895    0.522539    11.00000   -1.50000 
H64B  2    0.183964    0.302003    0.551792    11.00000   -1.50000 
H64C  2    0.215909    0.241922    0.631400    11.00000   -1.50000 
AFIX   0 
C65   1    0.923934    0.312106    0.292548    11.00000    0.09879    0.04587 = 
         0.09751   -0.02221   -0.01935    0.00045 
AFIX  23 
H65A  2    0.923332    0.289710    0.228489    11.00000   -1.20000 
H65B  2    0.938200    0.366154    0.285658    11.00000   -1.20000 
AFIX   0 
C66   1    0.090682    0.100980    0.054779    11.00000    0.06959    0.09903 = 
         0.11726   -0.02860   -0.00637   -0.00855 
AFIX  23 
H66A  2    0.086154    0.113462   -0.013436    11.00000   -1.20000 
H66B  2    0.029505    0.064824    0.068147    11.00000   -1.20000 
AFIX   0 
CL1   5    1.032089    0.272654    0.359330    11.00000    0.05537    0.06543 = 
         0.11902    0.00475    0.00098   -0.00249 
CL2   5    0.792351    0.298722    0.344306    11.00000    0.05923    0.09808 = 
         0.21660   -0.08303   -0.02398    0.01437 
CL3   5    0.066446    0.180995    0.119583    11.00000    0.05186    0.10869 = 
         0.09897   -0.02478    0.01517   -0.00413 
CL4   5    0.222290    0.058035    0.078055    11.00000    0.07698    0.06382 = 
         0.09292   -0.01485   -0.02008   -0.00375 
  
HKLF 4 1 1 0 0 0 1 0 0 0 1 
  
REM  cu_dm14205_0m in P2(1) 
REM R1 =  0.0618 for    6576 Fo > 4sig(Fo)  and  0.0797 for all    8251 data 
REM    747 parameters refined using      1 restraints 
  
END 
  
WGHT      0.0929      0.3901 
  
REM Instructions for potential hydrogen bonds 
EQIV $4 -x+1, y-1/2, -z 
HTAB N3 O1_$4 
EQIV $5 x, y, z+1 
HTAB N6 O2_$5 
HTAB C32 Cl2_$1 
HTAB C64 O5_$2 
HTAB C65 O4_$3 
  
REM Highest difference peak  0.311,  deepest hole -0.533,  1-sigma level  0.065 
Q1    1   0.0603  0.2471  0.1656  11.00000  0.05    0.31 
Q2    1   0.6791  0.1151  0.0331  11.00000  0.05    0.25 
Q3    1   0.6134  0.3593  0.3228  11.00000  0.05    0.25 
Q4    1   0.9550  0.1564  0.8445  11.00000  0.05    0.24 
Q5    1   0.9133  0.1217  0.7929  11.00000  0.05    0.24 
; 
_shelx_res_checksum   33433 
  
_shelx_hkl_file 
; 
  -1   0   0   13.05    1.42 
  -2   0   0  224.84   23.48 
  -3   0   0  108.87   11.05 
  -3   0   0  108.82    9.99 
  -3   0   0   98.83   11.68 
  -4   0   0   67.01    6.83 
  -4   0   0   62.70    6.17 
  -5   0   0   64.36    6.68 
  -5   0   0   65.98    6.04 
  -5   0   0   58.41    8.73 
  -6   0   0   33.00    4.83 
  -7   0   0   57.82    8.11 
  -8   0   0    0.58    0.70 
   8   0   0    0.37    0.42 
  -9   0   0    0.26    0.78 
   9   0   0   -0.23    0.41 
 -10   0   0    3.93    0.80 
 -10   0   0    4.58    1.18 
  10   0   0    4.37    0.76 
 -11   0   0    5.72    1.06 
  11   0   0    9.07    1.04 
 -11   0   0    8.89    1.57 
 -12   0   0    8.25    1.21 
 -12   0   0   10.50    1.10 
 -13   0   0   -0.05    0.25 
  13   0   0   -0.23    0.41 
 -13   0   0   -0.07    0.35 
 -14   0   0    3.72    0.40 
  14   0   0    3.28    0.49 
 -14   0   0    2.12    0.46 
   0  -1   0   -0.01    0.04 
   0  -1   0   -0.17    0.05 
  -1  -1   0   14.84    1.50 
  -1  -1   0   13.64    1.00 
   1   1   0   13.10    1.00 
  -2  -1   0  123.35   12.60 
  -2  -1   0  124.58   14.70 
  -2  -1   0  145.68    9.28 
  -2  -1   0  152.57   13.91 
  -2   1   0  119.55   13.94 
  -3  -1   0    6.43    0.71 
  -3  -1   0    7.56    0.71 
  -3  -1   0    6.27    0.65 
  -3  -1   0    7.05    0.49 
  -3   1   0    4.22    0.74 
  -3   1   0    4.16    0.61 
  -4  -1   0   27.31    2.53 
  -4  -1   0   26.61    2.91 
  -4   1   0   25.82    2.51 
  -4   1   0   23.74    2.96 
  -4   1   0   26.29    2.82 
  -5  -1   0   21.28    3.85 
  -5  -1   0   27.95    2.81 
  -5  -1   0   26.50    2.57 
  -5   1   0   27.39    3.00 
  -5   1   0   26.76    2.55 
  -5   1   0   21.02    3.80 
  -5   1   0   27.77    2.86 
  -6  -1   0    2.63    0.42 
  -6  -1   0    1.64    0.83 
  -6   1   0    2.25    0.46 
  -7  -1   0    4.24    0.99 
   7  -1   0    3.49    0.63 
  -7   1   0    4.91    1.02 
  -8  -1   0   11.10    1.70 
   8  -1   0    8.97    1.11 
  -8   1   0    8.64    1.61 
   8   1   0    8.28    1.15 
   9  -1   0    1.15    0.48 
  -9  -1   0    0.85    0.80 
  -9   1   0    2.80    0.95 
   9   1   0    1.33    0.55 
 -10  -1   0    1.06    0.90 
 -10  -1   0    1.00    0.56 
  10  -1   0    1.49    0.49 
 -10   1   0    1.59    0.88 
  10   1   0    1.50    0.55 
 -10   1   0    1.84    0.58 
 -11  -1   0    8.08    1.07 
  11  -1   0    6.03    0.89 
 -11  -1   0    5.49    0.86 
 -11  -1   0    8.17    1.47 
 -11   1   0    8.84    1.09 
 -11   1   0    5.97    1.43 
  11   1   0    6.00    0.94 
 -12  -1   0    0.33    0.40 
  12  -1   0   -0.29    0.53 
 -12  -1   0   -0.15    0.29 
  12   1   0   -0.61    0.40 
 -12   1   0   -0.48    0.41 
 -13  -1   0    2.66    0.53 
  13  -1   0    3.46    0.61 
 -13  -1   0    3.48    0.43 
 -13   1   0    2.19    0.43 
 -13   1   0    1.83    0.51 
 -14  -1   0    1.24    0.23 
  14  -1   0    1.40    0.32 
 -14  -1   0    0.54    0.31 
 -14   1   0    1.60    0.36 
  14   1   0    1.61    0.38 
 -14   1   0    1.38    0.27 
   0  -2   0   79.71    6.39 
   0  -2   0   79.00    8.38 
  -1  -2   0  166.63   11.45 
  -1  -2   0  163.06   17.19 
   1  -2   0  159.11   17.23 
   1   2   0  168.76   11.45 
  -2  -2   0  206.37   13.82 
  -2  -2   0  226.51   20.74 
  -2  -2   0  177.79   18.78 
  -2   2   0  181.59   20.78 
  -3  -2   0    6.36    0.63 
  -3  -2   0    6.41    0.47 
  -3  -2   0    4.66    0.64 
  -3   2   0    5.55    0.58 
  -3   2   0    5.05    0.75 
  -4  -2   0   11.67    1.21 
  -4  -2   0   12.63    0.89 
  -4  -2   0   10.62    1.28 
  -4   2   0   11.36    1.38 
  -4   2   0   12.24    1.17 
  -5  -2   0   18.23    1.74 
  -5  -2   0   17.20    2.03 
  -5  -2   0   18.16    2.54 
  -5   2   0   15.13    2.03 
  -5   2   0   17.35    1.96 
  -6  -2   0   64.73    7.43 
  -6  -2   0   50.93    5.07 
  -6   2   0   46.09    5.62 
  -7  -2   0    3.62    0.86 
   7  -2   0    3.30    0.52 
  -7   2   0    1.82    0.86 
   8  -2   0    8.61    1.52 
  -8  -2   0    7.28    1.52 
   8  -2   0    9.38    1.05 
  -8   2   0    9.19    1.59 
  -9  -2   0   10.51    1.82 
   9  -2   0    8.19    1.58 
   9  -2   0    9.82    1.12 
  -9   2   0   10.23    1.76 
   9   2   0    6.86    1.16 
 -10  -2   0    1.86    0.59 
 -10  -2   0    2.40    0.96 
  10  -2   0    1.92    0.48 
 -10  -2   0    1.59    0.46 
  10   2   0    1.57    0.57 
 -10   2   0    0.91    0.94 
 -10   2   0    0.74    0.53 
 -11  -2   0    1.89    0.49 
  11  -2   0    2.70    0.77 
 -11  -2   0    1.93    0.61 
 -11  -2   0    6.01    1.17 
 -11   2   0    3.25    0.69 
  11   2   0    2.32    0.63 
 -11   2   0    3.86    1.05 
 -12  -2   0    2.19    0.42 
  12  -2   0    3.15    0.67 
 -12  -2   0    2.03    0.54 
  12   2   0    2.21    0.55 
 -12   2   0    2.41    0.58 
  13  -2   0    3.23    0.56 
 -13  -2   0    2.51    0.52 
 -13  -2   0    2.95    0.40 
 -13   2   0    1.60    0.49 
 -14  -2   0    1.98    0.39 
  14  -2   0    1.82    0.34 
 -14   2   0    1.37    0.37 
 -14   2   0    2.10    0.32 
   0  -3   0   -0.02    0.08 
   0  -3   0   -0.13    0.17 
   0  -3   0   -0.08    0.10 
  -1  -3   0   29.53    3.21 
   1  -3   0   30.61    3.26 
   1   3   0   30.76    2.13 
  -2  -3   0  141.91   14.07 
  -2  -3   0  153.66   15.53 
  -2  -3   0  151.59   10.36 
   2   3   0  157.68   10.36 
  -2   3   0  136.54   15.58 
  -3  -3   0   48.42    3.33 
  -3  -3   0   46.10    4.53 
  -3  -3   0   51.90    4.96 
  -3   3   0   39.79    5.04 
  -4  -3   0    2.81    0.44 
  -4  -3   0    3.30    0.35 
  -4   3   0    3.68    0.61 
  -5  -3   0   46.68    5.08 
  -5  -3   0   46.22    4.36 
  -5  -3   0   45.91    6.34 
  -5   3   0   44.28    4.86 
  -5   3   0   41.66    5.11 
  -6  -3   0   32.50    3.06 
  -6  -3   0   30.90    3.56 
  -6  -3   0   25.18    4.57 
  -6   3   0   32.81    3.43 
  -6   3   0   27.12    3.57 
  -6   3   0   37.76    4.54 
  -7  -3   0    2.12    0.75 
   7  -3   0    1.68    0.39 
  -7  -3   0    2.17    0.45 
  -7   3   0    2.20    0.84 
  -8  -3   0    7.19    1.26 
   8  -3   0    5.15    0.67 
   8  -3   0    4.59    1.13 
  -8   3   0    1.89    1.16 
  -9  -3   0   27.10    3.99 
   9  -3   0   25.40    3.54 
   9  -3   0   25.46    2.68 
  -9   3   0   27.46    3.98 
 -10  -3   0    2.58    0.62 
 -10  -3   0    2.41    0.99 
  10  -3   0    2.08    0.91 
  10  -3   0    1.46    0.65 
 -10  -3   0    1.29    0.61 
 -10  -3   0    1.92    0.44 
  10   3   0    1.46    0.64 
 -10   3   0    2.17    1.06 
 -10   3   0    1.55    0.58 
 -11  -3   0    1.96    0.43 
 -11  -3   0    1.80    0.67 
 -11  -3   0    2.14    0.57 
  11  -3   0    2.56    0.68 
  11   3   0    1.40    0.59 
 -11   3   0    3.08    1.04 
 -11   3   0    1.65    0.58 
  11   3   0    1.75    0.76 
 -12  -3   0    3.80    0.50 
  12  -3   0    3.66    0.70 
 -12  -3   0    2.60    0.63 
  12   3   0    4.04    0.68 
 -12   3   0    3.10    0.66 
 -13  -3   0    0.68    0.23 
 -13  -3   0    0.32    0.35 
  13  -3   0    0.76    0.37 
 -13   3   0    0.38    0.35 
 -14  -3   0    0.41    0.28 
 -14   3   0    0.33    0.27 
   0  -4   0  409.61   42.79 
  -1  -4   0  133.85   13.18 
  -1  -4   0  141.18   11.14 
  -1  -4   0  136.86   14.57 
   1  -4   0  144.06   14.62 
   1   4   0  140.88    9.70 
  -2  -4   0  133.58   12.11 
  -2  -4   0  134.18   13.36 
   2   4   0  131.44    8.91 
   2   4   0  113.59   14.11 
  -3  -4   0   25.74    2.51 
  -3  -4   0   25.51    1.84 
  -3  -4   0   25.31    2.72 
  -3   4   0   26.12    2.84 
  -4  -4   0   47.10    5.61 
  -4  -4   0   50.99    4.82 
  -4   4   0   52.67    5.40 
  -5  -4   0   57.49    6.10 
   5  -4   0   57.68    6.38 
  -5  -4   0   49.84    7.56 
  -5  -4   0   59.41    5.23 
  -5   4   0   51.23    5.82 
  -5   4   0   47.59    6.13 
  -6  -4   0    1.07    0.35 
  -6  -4   0    1.38    0.38 
   6  -4   0    2.39    0.55 
  -6  -4   0    0.87    0.72 
  -6   4   0    1.65    0.50 
  -6   4   0    1.53    0.52 
   7  -4   0   13.43    1.34 
  -7  -4   0   13.28    2.04 
  -7  -4   0   12.60    1.42 
  -7   4   0   11.10    1.60 
  -7   4   0   11.27    2.02 
   8  -4   0    1.55    0.35 
   8  -4   0    1.93    0.84 
  -8  -4   0    1.93    0.84 
  -8   4   0    2.78    0.98 
   9  -4   0   14.43    1.72 
   9  -4   0   17.40    2.33 
  -9  -4   0   16.34    2.50 
  -9  -4   0   13.01    1.53 
  -9   4   0   15.80    2.48 
 -10  -4   0   28.00    3.00 
 -10  -4   0   25.78    2.59 
  10  -4   0   23.90    3.60 
 -10  -4   0   27.52    3.03 
  10  -4   0   24.30    2.71 
 -10   4   0   28.54    3.02 
 -10   4   0   31.01    4.26 
  11  -4   0    0.60    0.49 
 -11  -4   0   -0.21    0.42 
  11  -4   0   -0.24    0.78 
 -11  -4   0    0.01    0.28 
 -11  -4   0    0.89    0.55 
 -11   4   0   -1.25    0.94 
  11   4   0   -0.53    0.49 
 -11   4   0    0.19    0.48 
  12  -4   0    7.04    0.88 
 -12  -4   0    5.68    0.87 
 -12  -4   0    5.29    0.67 
 -12   4   0    5.49    0.88 
  12   4   0    5.61    0.95 
  12   4   0    6.69    0.88 
 -13  -4   0    0.87    0.20 
  13  -4   0    1.15    0.34 
 -13  -4   0    0.96    0.39 
 -13   4   0    1.04    0.40 
 -14  -4   0    2.03    0.38 
 -14   4   0    1.85    0.37 
   0  -5   0   -0.05    0.12 
   0  -5   0   -0.11    0.14 
   0  -5   0   -0.28    0.23 
  -1  -5   0   12.50    1.46 
   1  -5   0   11.97    1.51 
  -1  -5   0   12.33    1.29 
  -1  -5   0   12.57    1.10 
   1   5   0   14.01    0.95 
  -2  -5   0    2.41    0.38 
  -2  -5   0    3.43    0.49 
  -2  -5   0    2.79    0.44 
   2   5   0    4.96    0.49 
   2   5   0    3.45    0.32 
  -3  -5   0    8.68    0.92 
  -3   5   0    9.05    1.18 
   3   5   0    8.11    0.66 
  -4  -5   0   10.12    1.17 
   4  -5   0   11.90    1.51 
  -4  -5   0   10.64    1.37 
  -4   5   0    9.22    1.36 
  -5  -5   0   21.62    1.97 
  -5  -5   0   19.62    2.28 
  -5  -5   0   19.04    2.86 
   5  -5   0   19.62    2.38 
  -5   5   0   19.40    2.23 
  -5   5   0   14.69    2.30 
  -6  -5   0   11.34    1.53 
  -6  -5   0   11.45    1.30 
  -6  -5   0   11.30    1.86 
   6  -5   0   13.64    1.69 
  -6   5   0   10.09    1.51 
  -6   5   0   10.89    1.59 
  -7  -5   0    1.48    0.41 
   7  -5   0    1.84    0.77 
   7  -5   0    1.31    0.52 
  -7  -5   0    1.99    0.79 
  -7   5   0    1.02    0.80 
  -7   5   0    1.08    0.54 
  -8  -5   0    6.40    1.00 
   8  -5   0    7.43    1.43 
  -8  -5   0    9.84    1.64 
  -8   5   0    9.59    1.66 
   9  -5   0   11.83    1.41 
  -9  -5   0   12.26    1.24 
   9  -5   0   11.57    1.90 
  -9   5   0   10.44    2.04 
  10  -5   0    2.49    0.61 
 -10  -5   0    3.06    0.45 
 -10  -5   0    2.92    0.65 
 -10  -5   0    2.27    0.68 
 -10   5   0    1.09    1.05 
 -10   5   0    1.37    0.60 
  11  -5   0    5.50    1.20 
 -11  -5   0    5.57    0.86 
  11  -5   0    4.78    0.78 
 -11  -5   0    3.68    0.81 
 -11  -5   0    5.50    0.64 
 -11   5   0    5.08    0.85 
 -11   5   0    6.28    1.45 
 -12  -5   0    0.49    0.42 
 -12  -5   0    0.97    0.24 
  12  -5   0    0.29    0.36 
  12   5   0    0.57    0.57 
 -12   5   0    1.53    0.51 
  12   5   0    1.51    0.51 
 -13  -5   0    1.06    0.38 
 -13   5   0    1.19    0.41 
   0  -6   0   38.81    3.14 
   0  -6   0   39.13    3.69 
   0  -6   0   37.08    4.14 
  -1  -6   0    5.49    0.49 
   1  -6   0    4.22    0.71 
  -1  -6   0    3.86    0.63 
  -1  -6   0    3.97    0.53 
   1   6   0    4.81    0.41 
  -2  -6   0   17.70    1.55 
  -2  -6   0   18.91    2.02 
  -2  -6   0   19.13    1.84 
   2   6   0   17.82    2.09 
   2   6   0   18.29    1.33 
  -3  -6   0   50.32    4.40 
  -3  -6   0   57.82    5.22 
  -3  -6   0   57.97    6.09 
   3  -6   0   50.89    6.36 
  -3   6   0   53.81    5.84 
   4  -6   0   45.52    5.70 
  -4  -6   0   48.20    5.44 
  -4  -6   0   53.64    4.69 
  -4   6   0   44.90    5.24 
   5  -6   0    2.07    0.55 
  -5  -6   0    1.37    0.42 
  -5  -6   0    1.13    0.35 
  -5   6   0    2.21    0.60 
  -5   6   0    1.91    0.58 
   6  -6   0    6.31    1.02 
  -6  -6   0    6.23    0.78 
  -6  -6   0    4.39    0.84 
  -6   6   0    4.95    0.94 
  -6   6   0    4.90    0.92 
   7  -6   0    9.01    1.43 
  -7  -6   0    6.43    0.98 
  -7  -6   0    8.50    1.19 
   7  -6   0    8.61    1.31 
  -7   6   0    7.51    1.20 
  -8  -6   0    9.96    1.21 
   8  -6   0   10.73    1.65 
  -8   6   0    7.30    1.69 
   9  -6   0    2.45    0.89 
  -9  -6   0    3.51    0.68 
   9  -6   0    1.98    0.91 
   9  -6   0    1.46    0.53 
  -9  -6   0    1.92    0.38 
  -9  -6   0    1.53    0.63 
  -9   6   0    2.05    1.08 
  -9   6   0    1.61    0.62 
 -10  -6   0    3.09    0.68 
  10  -6   0    1.57    0.87 
 -10  -6   0    2.15    0.61 
 -10  -6   0    1.91    0.37 
  10  -6   0    1.85    0.55 
 -10   6   0    2.38    1.14 
 -10   6   0    2.25    0.62 
 -11  -6   0    4.09    0.51 
 -11  -6   0    3.75    0.73 
 -11  -6   0    3.72    0.75 
  11  -6   0    5.82    0.70 
  11  -6   0    4.63    1.11 
 -11   6   0    4.30    0.77 
  12  -6   0    1.88    0.73 
  12  -6   0    3.20    0.44 
 -12  -6   0    2.52    0.55 
  12   6   0    2.51    0.61 
  12   6   0    1.55    0.64 
 -12   6   0    2.16    0.55 
 -13  -6   0    0.88    0.36 
  13   6   0    0.95    0.47 
 -13   6   0    1.12    0.39 
   0  -7   0    0.06    0.14 
   0  -7   0    0.17    0.18 
   0  -7   0   -0.28    0.28 
  -1  -7   0   10.23    1.07 
  -1  -7   0    8.22    1.22 
   1   7   0   11.33    0.79 
  -2  -7   0   16.42    1.41 
   2  -7   0   15.17    2.04 
  -2  -7   0   16.87    1.66 
  -2  -7   0   17.40    1.96 
  -2  -7   0   15.42    1.83 
   3  -7   0   25.25    3.18 
  -3  -7   0   26.87    3.04 
  -3  -7   0   25.01    2.20 
  -3  -7   0   27.20    2.60 
  -3   7   0   26.62    2.98 
  -4  -7   0   12.65    1.29 
   4  -7   0   14.26    1.84 
  -4  -7   0   14.58    1.76 
  -4  -7   0   14.80    1.49 
  -4   7   0   12.95    1.81 
  -5  -7   0    6.44    0.85 
   5  -7   0    8.17    1.17 
  -5  -7   0    6.03    0.98 
  -5   7   0    6.65    1.11 
  -5   7   0    5.67    1.08 
  -6  -7   0    5.19    0.70 
  -6  -7   0    3.82    0.76 
   6  -7   0    4.68    0.90 
  -6   7   0    4.15    0.85 
  -6   7   0    3.43    0.83 
  -7  -7   0   24.48    2.85 
  -7  -7   0   22.80    2.43 
   7  -7   0   25.75    3.25 
   7  -7   0   23.23    2.95 
  -7   7   0   21.76    2.78 
   8  -7   0    2.00    0.83 
  -8  -7   0    1.69    0.50 
  -8   7   0    2.23    1.09 
  -9  -7   0   14.04    1.45 
  -9  -7   0   14.04    1.82 
   9  -7   0   20.26    2.45 
   9  -7   0   13.50    2.14 
   9  -7   0   14.58    1.55 
  -9  -7   0   17.09    1.88 
  -9   7   0   14.86    1.83 
  -9   7   0   14.48    2.52 
 -10  -7   0    1.24    0.53 
  10  -7   0    2.03    0.45 
  10  -7   0    0.47    0.81 
 -10  -7   0    0.75    0.23 
 -10  -7   0    0.93    0.56 
  10  -7   0    0.56    0.78 
 -10   7   0    0.75    1.00 
 -10   7   0    0.47    0.51 
 -11  -7   0    3.52    0.77 
  11  -7   0    5.52    1.14 
  11  -7   0    4.44    0.58 
 -11  -7   0    4.09    0.76 
 -11   7   0    4.22    0.75 
  12  -7   0    0.55    0.62 
 -12  -7   0    0.68    0.46 
 -12  -7   0    0.55    0.40 
  12   7   0    0.45    0.52 
 -12   7   0    0.71    0.42 
 -13  -7   0    1.32    0.38 
 -13   7   0    1.55    0.38 
  13   7   0    0.81    0.44 
   0  -8   0   99.84    9.67 
   0  -8   0  103.94    8.20 
  -1  -8   0   21.51    2.51 
  -1  -8   0   22.97    2.62 
   1  -8   0   22.06    2.74 
  -1  -8   0   23.59    1.90 
  -1  -8   0   22.39    2.22 
   1   8   0   21.83    2.62 
  -2  -8   0    5.68    0.90 
   2  -8   0    5.90    1.01 
  -2  -8   0    5.82    0.67 
  -2  -8   0    7.03    0.78 
  -2   8   0    7.03    1.03 
  -3  -8   0   27.69    2.62 
  -3  -8   0   24.73    2.21 
   3  -8   0   27.42    3.21 
  -3  -8   0   25.41    3.06 
  -3   8   0   25.38    3.00 
  -4  -8   0    7.25    0.87 
   4  -8   0    9.37    1.23 
  -4  -8   0    7.05    1.01 
  -4  -8   0    6.04    0.75 
  -4   8   0    4.36    1.07 
  -4   8   0    6.17    1.09 
  -5  -8   0   12.78    1.42 
  -5  -8   0   10.27    1.58 
   5  -8   0   12.81    1.78 
  -5   8   0   12.73    1.75 
  -5   8   0   12.61    1.78 
   6  -8   0    7.95    1.52 
  -6  -8   0    9.26    1.39 
   6  -8   0    9.17    1.49 
  -6  -8   0   10.66    1.20 
  -6   8   0   10.15    1.50 
  -7  -8   0   14.28    1.97 
   7  -8   0   11.11    2.08 
   7  -8   0   18.32    2.32 
   7  -8   0   16.02    2.17 
  -7  -8   0   15.62    1.74 
  -8  -8   0    5.45    0.90 
   8  -8   0    6.56    0.79 
  -8  -8   0    6.36    0.98 
   8  -8   0    6.05    1.31 
   8  -8   0    5.60    1.13 
  -8   8   0    9.84    1.56 
   9  -8   0    2.74    1.07 
  -9  -8   0    3.13    0.69 
   9  -8   0    2.44    0.48 
  -9  -8   0    3.70    0.61 
   9  -8   0    2.04    0.94 
  -9  -8   0    2.53    0.71 
  -9   8   0    3.73    0.76 
  -9   8   0    3.68    1.20 
 -10  -8   0    3.01    0.73 
 -10  -8   0    3.43    0.72 
  10  -8   0    3.09    0.93 
  10  -8   0    3.28    1.01 
 -10   8   0    2.93    0.69 
 -10   8   0    3.84    1.25 
  11  -8   0   -0.04    0.63 
 -11  -8   0    0.32    0.44 
 -11  -8   0    0.50    0.46 
 -11   8   0    0.25    0.44 
 -12  -8   0    1.92    0.52 
  12  -8   0    2.42    0.69 
 -12  -8   0    2.31    0.52 
 -12   8   0    2.11    0.50 
  12   8   0    1.93    0.60 
 -13  -8   0    0.11    0.30 
  13   8   0    0.57    0.38 
 -13   8   0    0.57    0.30 
   0  -9   0    0.07    0.31 
   0  -9   0    0.16    0.27 
   0  -9   0    0.40    0.24 
   0  -9   0    0.32    0.17 
   0   9   0   -0.89    0.30 
  -1  -9   0   11.93    1.28 
  -1  -9   0   13.85    1.59 
   1  -9   0   11.90    1.62 
  -1  -9   0   11.52    1.14 
  -2  -9   0    7.98    0.85 
  -2  -9   0    8.15    1.15 
   2  -9   0    8.81    1.29 
  -2  -9   0    8.16    0.97 
  -2   9   0    9.72    1.35 
  -3  -9   0    9.86    1.13 
   3  -9   0    9.97    1.44 
  -3   9   0    7.44    1.38 
  -3   9   0   10.32    1.43 
  -4  -9   0   15.63    2.07 
  -4  -9   0   16.92    1.78 
   4  -9   0   15.66    2.16 
  -4   9   0   18.71    2.24 
  -4   9   0   18.60    2.20 
   5  -9   0   26.32    3.34 
  -5  -9   0   26.62    2.74 
  -5  -9   0   30.04    3.21 
   5  -9   0   21.90    3.43 
  -5   9   0   27.96    3.18 
  -5   9   0   29.31    3.34 
   6  -9   0    7.65    1.32 
  -6  -9   0    8.94    1.06 
   6  -9   0    9.25    1.45 
  -6  -9   0    7.21    1.18 
   6  -9   0    5.75    1.28 
   7  -9   0   20.14    2.62 
   7  -9   0   27.75    3.14 
   7  -9   0   20.37    2.76 
   7  -9   0   23.54    3.03 
  -7  -9   0   19.66    2.28 
  -7  -9   0   22.67    2.66 
   8  -9   0   -0.22    0.65 
   8  -9   0    0.27    0.51 
   8  -9   0   -0.23    0.58 
  -8  -9   0    0.06    0.46 
  -8  -9   0    0.06    0.59 
   8  -9   0    0.26    0.80 
  -8  -9   0    0.42    0.42 
  -8   9   0   -0.55    1.00 
   9  -9   0    2.89    0.87 
  -9  -9   0    0.10    0.57 
  -9  -9   0    0.98    0.43 
   9  -9   0    1.28    0.82 
  -9  -9   0    1.06    0.52 
  -9   9   0    0.46    1.07 
  -9   9   0    0.87    0.59 
  10  -9   0    1.84    0.77 
 -10  -9   0    2.15    0.64 
 -10  -9   0    2.60    0.63 
  10  -9   0    1.01    0.76 
 -10   9   0    1.42    0.57 
 -11  -9   0    0.03    0.44 
  11  -9   0    0.16    0.60 
 -11  -9   0    0.09    0.43 
  11  -9   0   -1.25    0.63 
 -11   9   0    0.82    0.46 
 -12  -9   0    2.70    0.52 
 -12  -9   0    2.23    0.51 
 -12   9   0    2.12    0.50 
  12   9   0    2.32    0.58 
   0 -10   0   80.23    7.43 
   0 -10   0   77.11    9.09 
   0  10   0   74.97    8.78 
  -1 -10   0    4.05    0.53 
   1 -10   0    4.10    0.76 
  -1 -10   0    3.17    0.64 
  -1  10   0    2.52    0.73 
  -1  10   0    3.04    0.75 
   2 -10   0   21.74    2.70 
  -2 -10   0   20.64    2.55 
  -2 -10   0   22.45    2.17 
  -2  10   0   20.43    2.54 
  -2  10   0   21.43    2.65 
   3 -10   0    1.20    0.47 
  -3 -10   0    0.47    0.37 
  -3 -10   0    0.95    0.33 
  -3  10   0    0.70    0.50 
  -3  10   0    1.54    0.64 
  -4 -10   0    3.40    0.63 
   4 -10   0    3.78    0.87 
  -4 -10   0    3.19    0.73 
  -4  10   0    5.54    1.02 
  -4  10   0    6.35    1.02 
   5 -10   0    3.24    0.82 
  -5 -10   0    4.05    0.61 
   5 -10   0    1.98    0.75 
  -5 -10   0    4.08    0.75 
   5 -10   0    2.29    0.86 
  -5  10   0    2.43    0.85 
  -6 -10   0    5.65    1.02 
   6 -10   0    4.13    1.10 
   6 -10   0    5.96    1.24 
  -6 -10   0    4.93    0.81 
   6 -10   0    7.90    1.21 
   7 -10   0    9.48    1.70 
  -7 -10   0   10.69    1.37 
   7 -10   0   10.35    1.53 
   7 -10   0   10.04    1.64 
   7 -10   0   12.27    1.71 
  -7 -10   0   11.18    1.57 
   7 -10   0    8.02    1.68 
  -7 -10   0   10.29    1.29 
  -8 -10   0    1.37    0.47 
  -8 -10   0    2.13    0.54 
   8 -10   0    1.24    0.81 
   8 -10   0    0.55    0.57 
   8 -10   0    1.11    0.61 
   8 -10   0    0.48    0.83 
  -8  10   0    1.29    1.12 
  -9 -10   0    2.98    0.65 
   9 -10   0    2.89    0.79 
   9 -10   0    5.73    1.12 
  -9 -10   0    2.96    0.57 
   9 -10   0    2.40    0.80 
  -9  10   0    2.47    0.70 
  -9  10   0    1.92    1.24 
 -10 -10   0    0.81    0.36 
 -10 -10   0    0.90    0.55 
  10 -10   0    0.18    0.65 
  10 -10   0    0.42    0.62 
 -10 -10   0    0.23    0.48 
 -10  10   0    0.69    0.50 
  11 -10   0    1.03    0.58 
  11 -10   0    1.08    0.69 
 -11 -10   0    1.89    0.49 
 -11  10   0    0.73    0.47 
 -12 -10   0    2.10    0.45 
 -12  10   0    2.22    0.46 
  12  10   0    1.34    0.50 
  -1 -11   0    2.45    0.44 
  -1 -11   0    2.81    0.59 
   1 -11   0    2.59    0.67 
  -1  11   0    3.04    0.79 
  -1  11   0    3.57    0.75 
  -2 -11   0    2.62    0.45 
   2 -11   0    3.04    0.70 
  -2 -11   0    2.23    0.57 
  -2  11   0    2.14    0.65 
  -2  11   0    2.76    0.77 
   3 -11   0   26.24    2.98 
  -3 -11   0   22.54    2.79 
  -3 -11   0   20.62    2.36 
  -3  11   0   23.09    2.91 
  -3  11   0   26.02    2.86 
  -4 -11   0    9.44    1.44 
  -4 -11   0    8.88    1.22 
   4 -11   0    9.76    1.61 
   4 -11   0   14.45    1.94 
   4 -11   0   12.22    1.73 
  -4  11   0   13.32    1.78 
   5 -11   0   22.04    2.90 
  -5 -11   0   28.30    2.48 
  -5 -11   0   22.76    2.85 
   5 -11   0   22.18    2.99 
   5 -11   0   21.77    3.08 
   6 -11   0    3.00    0.83 
  -6 -11   0    2.80    0.60 
  -6 -11   0    2.02    0.67 
   6 -11   0    2.47    0.83 
   6 -11   0    3.64    0.95 
   6 -11   0    2.90    0.77 
   7 -11   0    3.14    0.92 
  -7 -11   0    2.11    0.68 
   7 -11   0    3.36    1.00 
   7 -11   0    3.66    0.89 
   7 -11   0    3.04    0.78 
  -7 -11   0    3.28    0.60 
  -7 -11   0    2.52    0.64 
   7 -11   0    2.02    0.96 
  -8 -11   0    2.45    0.64 
   8 -11   0    2.89    0.80 
  -8 -11   0    2.44    0.57 
   8 -11   0    5.98    1.12 
   8 -11   0    3.32    0.81 
   8 -11   0    3.59    1.06 
  -8  11   0    2.24    1.24 
   9 -11   0   12.32    1.76 
  -9 -11   0   11.51    1.62 
  -9 -11   0   14.37    1.61 
   9 -11   0   12.56    2.00 
   9 -11   0   16.65    2.05 
 -10 -11   0    1.93    0.40 
 -10 -11   0    0.87    0.48 
  10 -11   0    0.43    0.70 
  10 -11   0    1.33    0.66 
 -10  11   0    1.57    0.54 
  11 -11   0    3.03    0.74 
 -11 -11   0    6.79    0.77 
  11 -11   0    5.98    0.98 
  12  11   0    0.26    0.39 
   1 -12   0    1.76    0.59 
  -1  12   0    2.41    0.75 
  -1  12   0    2.41    0.66 
  -2 -12   0   16.16    1.91 
  -2 -12   0   19.28    2.31 
   2 -12   0   20.69    2.43 
   2 -12   0   17.46    2.43 
  -2  12   0   24.01    2.65 
  -3 -12   0    8.02    1.23 
   3 -12   0    8.78    1.42 
   3 -12   0   13.86    1.78 
  -3 -12   0    8.04    1.03 
   3 -12   0    7.29    1.30 
  -4 -12   0    0.79    0.38 
   4 -12   0    0.66    0.56 
   4 -12   0    0.05    0.48 
   4 -12   0    0.15    0.53 
  -4 -12   0    0.88    0.49 
   5 -12   0    6.57    1.12 
  -5 -12   0    4.17    0.74 
  -5 -12   0    3.18    0.80 
   5 -12   0    5.52    1.08 
   5 -12   0    4.12    1.06 
   5 -12   0    5.15    0.96 
  -6 -12   0    8.59    1.17 
   6 -12   0    7.70    1.57 
   6 -12   0    9.82    1.43 
   6 -12   0   10.34    1.60 
  -6 -12   0    8.05    1.36 
  -6 -12   0    9.66    1.16 
   6 -12   0    7.73    1.45 
   6 -12   0    7.44    1.44 
   7 -12   0    5.87    1.28 
   7 -12   0    9.44    1.51 
  -7 -12   0    8.20    1.07 
   7 -12   0    9.66    1.36 
  -7 -12   0    7.35    1.11 
   7 -12   0    8.35    1.46 
   8 -12   0    3.04    1.00 
   8 -12   0    3.04    0.84 
  -8 -12   0    1.90    0.55 
  -8 -12   0    2.62    0.52 
   8 -12   0    1.78    0.67 
  -8  12   0    0.06    1.20 
   9 -12   0    2.12    0.85 
  -9 -12   0    3.20    0.60 
   9 -12   0    1.21    0.69 
   9 -12   0    1.99    0.68 
  -9 -12   0    2.47    0.49 
  10 -12   0    3.13    0.94 
  10 -12   0    2.79    0.69 
 -10 -12   0    4.75    0.70 
  10 -12   0    4.42    0.77 
 -10 -12   0    3.16    0.54 
 -11 -12   0    0.64    0.34 
  11 -12   0   -0.05    0.55 
 -11 -12   0    1.11    0.29 
   1 -13   0   15.47    2.05 
   2 -13   0   24.19    2.92 
  -2 -13   0   22.35    2.77 
   2 -13   0   28.36    2.97 
  -2 -13   0   20.04    2.32 
  -3 -13   0   10.93    1.46 
   3 -13   0    9.61    1.53 
  -3 -13   0    9.49    1.18 
   3 -13   0    9.40    1.62 
  -4 -13   0    3.86    0.64 
   4 -13   0    2.41    0.80 
   4 -13   0    4.87    0.99 
   4 -13   0    2.25    0.88 
   4 -13   0    4.08    0.84 
  -4 -13   0    2.97    0.73 
  -5 -13   0   12.30    1.42 
   5 -13   0    9.48    1.67 
  -5 -13   0   10.98    1.60 
   5 -13   0   13.45    1.85 
  -5 -13   0   11.86    1.39 
   5 -13   0   10.80    1.61 
   5 -13   0   12.17    1.81 
   5 -13   0    6.16    1.63 
  -6 -13   0   25.72    2.94 
   6 -13   0   28.63    3.33 
   6 -13   0   29.52    3.24 
   6 -13   0   27.65    3.65 
   6 -13   0   26.07    3.37 
  -6 -13   0   26.56    3.22 
   6 -13   0   26.60    3.49 
  -6 -13   0   24.64    2.93 
   7 -13   0    3.94    0.92 
   7 -13   0    4.21    1.08 
   7 -13   0    4.84    1.04 
  -7 -13   0    4.14    0.70 
  -7 -13   0    3.99    0.74 
   7 -13   0    3.92    0.94 
  -8 -13   0    4.65    0.74 
   8 -13   0    4.95    1.11 
  -8 -13   0    3.92    0.63 
   8 -13   0    2.57    0.76 
   8 -13   0    2.84    0.82 
  -9 -13   0    2.57    0.62 
   9 -13   0    3.24    0.94 
   9 -13   0    2.88    0.78 
   9 -13   0    3.21    0.71 
  -9 -13   0    2.84    0.54 
  10 -13   0    1.32    0.70 
 -10 -13   0    1.63    0.32 
  10 -13   0    0.76    0.52 
  10 -13   0    0.82    0.49 
 -10 -13   0    1.10    0.43 
 -11 -13   0    0.18    0.28 
  11 -13   0    0.12    0.35 
   2 -14   0    1.86    0.69 
   2 -14   0    0.23    0.48 
   2 -14   0    0.62    0.61 
   3 -14   0    6.92    1.25 
  -3 -14   0    5.49    1.10 
   3 -14   0    8.06    1.33 
  -3 -14   0    6.96    0.99 
   3 -14   0    8.46    1.28 
   3 -14   0    6.97    1.37 
   3 -14   0    6.83    1.21 
   4 -14   0    9.71    2.00 
   4 -14   0   14.78    2.01 
   4 -14   0   15.01    2.14 
  -4 -14   0   14.07    1.68 
   4 -14   0   11.80    1.97 
   4 -14   0   14.40    1.94 
  -4 -14   0   12.86    1.89 
  -4 -14   0   17.55    1.74 
  -5 -14   0    0.89    0.54 
   5 -14   0    0.31    0.62 
   5 -14   0    0.63    0.59 
   5 -14   0    0.99    0.79 
   5 -14   0    0.15    0.62 
   5 -14   0    1.85    0.72 
  -5 -14   0    1.04    0.43 
  -5 -14   0    1.57    0.53 
  -6 -14   0    2.04    0.57 
  -6 -14   0    2.04    0.49 
   6 -14   0    1.11    0.68 
   6 -14   0    2.53    0.93 
   6 -14   0    0.93    0.62 
   6 -14   0    1.75    0.66 
  -6 -14   0    2.01    0.61 
   7 -14   0   22.23    2.71 
  -7 -14   0   22.66    2.47 
  -7 -14   0   20.30    2.44 
   7 -14   0   23.91    2.81 
  -8 -14   0    3.37    0.60 
   8 -14   0    1.08    0.48 
  -8 -14   0    3.95    0.54 
   8 -14   0    3.09    0.74 
   8 -14   0    2.87    0.91 
   9 -14   0    1.98    0.58 
   9 -14   0    1.69    0.63 
   9 -14   0    2.93    0.81 
  -9 -14   0    1.24    0.36 
  -9 -14   0    1.56    0.49 
 -10 -14   0    0.96    0.29 
 -10 -14   0    1.46    0.38 
  10 -14   0    0.86    0.45 
 -11 -14   0    0.54    0.15 
   2 -15   0    5.06    1.05 
   2 -15   0    6.61    1.28 
   2 -15   0    5.00    1.04 
   3 -15   0    2.18    0.84 
   3 -15   0    0.49    0.57 
  -3 -15   0    0.61    0.47 
   3 -15   0    1.62    0.75 
   3 -15   0    2.24    0.70 
   4 -15   0    3.60    1.06 
   4 -15   0    6.92    1.14 
   4 -15   0    3.42    1.02 
   4 -15   0    4.01    0.91 
  -4 -15   0    5.49    0.78 
   4 -15   0    3.81    0.89 
  -4 -15   0    4.30    0.85 
   5 -15   0    8.13    1.19 
  -5 -15   0    9.73    0.99 
  -5 -15   0    6.30    0.93 
   5 -15   0   12.68    1.42 
   5 -15   0    6.72    1.20 
  -5 -15   0    5.92    1.04 
   5 -15   0    2.64    0.93 
   6 -15   0    8.48    1.23 
  -6 -15   0    7.92    1.00 
  -6 -15   0    8.27    1.07 
   6 -15   0   10.86    1.47 
   6 -15   0    4.00    1.14 
   7 -15   0    1.99    0.77 
   7 -15   0    1.81    0.61 
   7 -15   0    1.37    0.70 
  -7 -15   0    2.22    0.51 
  -7 -15   0    1.44    0.42 
  -8 -15   0    2.73    0.53 
   8 -15   0    1.60    0.64 
   8 -15   0    2.90    0.81 
   8 -15   0    2.44    0.64 
  -8 -15   0    1.68    0.40 
   9 -15   0    0.65    0.44 
   9 -15   0    0.52    0.48 
  -9 -15   0    0.13    0.36 
   9 -15   0    0.70    0.57 
  -9 -15   0    0.11    0.26 
 -10 -15   0    1.88    0.40 
  10 -15   0    2.33    0.59 
 -10 -15   0    2.04    0.33 
   3 -16   0    2.57    0.79 
   3 -16   0    2.98    0.78 
   4 -16   0   15.21    2.20 
   4 -16   0   15.44    2.13 
   4 -16   0   17.48    2.02 
  -4 -16   0   14.23    1.79 
   5 -16   0    0.53    0.55 
  -5 -16   0    0.83    0.41 
   5 -16   0    0.86    0.83 
   5 -16   0    1.03    0.64 
  -5 -16   0    1.06    0.45 
   6 -16   0    5.92    1.15 
  -6 -16   0    6.32    0.89 
  -6 -16   0    6.11    0.85 
   6 -16   0    6.42    1.04 
  -7 -16   0    0.68    0.41 
   7 -16   0    1.06    0.49 
   7 -16   0    0.86    0.69 
   7 -16   0    0.59    0.56 
  -7 -16   0    0.77    0.33 
   8 -16   0    3.26    0.76 
  -8 -16   0    1.81    0.50 
  -8 -16   0    2.59    0.42 
   8 -16   0    3.14    0.63 
   8 -16   0    1.48    0.63 
   9 -16   0    0.90    0.51 
   9 -16   0   -0.13    0.38 
  -9 -16   0    0.85    0.24 
  -9 -16   0    0.34    0.31 
   3 -17   0    1.62    0.63 
  -4 -17   0    0.22    0.37 
   4 -17   0    0.14    0.52 
   4 -17   0   -0.26    0.79 
   5 -17   0    3.74    0.81 
   5 -17   0    2.56    0.82 
  -5 -17   0    4.76    0.64 
  -6 -17   0    3.86    0.63 
   6 -17   0    5.15    0.87 
  -6 -17   0    4.51    0.69 
   6 -17   0    4.98    0.91 
   7 -17   0    3.29    0.69 
   7 -17   0    1.83    0.67 
  -7 -17   0    4.18    0.53 
  -7 -17   0    3.39    0.57 
   7 -17   0    3.81    0.76 
  -8 -17   0    0.33    0.32 
  -8 -17   0    0.66    0.25 
   8 -17   0    0.56    0.54 
   8 -17   0    0.61    0.41 
   9 -17   0    4.56    0.74 
   4 -18   0    0.80    0.54 
   5 -18   0    2.08    0.60 
   5 -18   0    2.03    0.65 
  -5 -18   0    2.11    0.43 
   6 -18   0    0.27    0.43 
   6 -18   0    1.05    0.64 
  -6 -18   0    1.58    0.33 
  -7 -18   0    1.30    0.30 
   7 -18   0    1.80    0.51 
   7 -18   0    0.76    0.43 
   8 -18   0   -0.38    0.41 
   4 -19   0    3.74    0.74 
   5 -19   0    0.32    0.58 
  -5 -19   0    0.68    0.28 
   5 -19   0    0.35    0.42 
   6 -19   0    1.44    0.47 
  -6 -19   0    1.27    0.30 
   6 -19   0    0.88    0.42 
 -14   0   1   -0.15    0.26 
  14   0  -1    0.44    0.29 
 -14   0   1    0.20    0.18 
  13   0  -1    5.39    0.72 
 -13   0   1    2.55    0.58 
 -13   0   1    3.60    0.50 
 -12   0   1   -0.11    0.39 
 -12   0   1   -0.15    0.32 
 -11   0   1    2.02    0.89 
 -11   0   1    0.53    0.49 
  11   0  -1    0.07    0.42 
 -10   0   1    0.56    0.50 
 -10   0   1    0.33    0.82 
  10   0  -1    0.01    0.44 
   9   0  -1    0.48    0.40 
  -9   0   1    0.02    0.79 
  -8   0   1    2.43    0.84 
   8   0  -1    2.10    0.51 
  -7   0   1   14.47    2.19 
   7   0  -1   13.43    1.54 
  -6   0   1   28.52    4.29 
  -5   0   1   14.81    1.75 
  -5   0   1   15.59    1.59 
  -5   0   1   17.97    2.39 
  -4   0   1   10.21    1.22 
  -4   0   1   10.39    1.06 
  -4   0   1   10.36    1.18 
  -3   0   1  141.13   13.71 
  -3   0   1  143.24   15.17 
  -3   0   1  150.57   16.04 
  -2   0   1   24.11    2.71 
  -1   0   1    0.74    0.13 
   1   0  -1    0.75    0.14 
   0   0  -1  128.24   12.91 
   0   0   1  119.22    9.86 
  -1   0  -1  143.07   15.35 
  -1   0  -1  149.68   10.22 
  -2   0  -1   71.74    4.96 
  -2   0  -1   70.14    7.45 
  -2   0  -1   70.68    6.74 
  -3   0  -1  955.63   66.96 
  -3   0  -1  935.96   90.96 
  -3   0  -1 1000.00  100.53 
  -4   0  -1   29.97    2.83 
  -4   0  -1   27.16    2.09 
  -4   0  -1   30.10    3.13 
  -5   0  -1  261.37   22.73 
  -5   0  -1  219.24   32.61 
  -6   0  -1   34.90    4.06 
  -6   0  -1   41.11    3.69 
  -7   0  -1   14.14    2.10 
   7   0   1   11.83    1.47 
   8   0   1   -0.19    0.41 
   8   0   1    0.89    0.78 
  -8   0  -1    0.73    0.66 
  -9   0  -1   24.32    3.75 
   9   0   1   25.15    2.63 
  10   0   1   37.84    3.51 
 -10   0  -1   31.13    5.07 
 -10   0  -1   32.47    3.70 
 -11   0  -1   12.92    2.20 
  11   0   1   13.70    1.54 
 -11   0  -1   12.94    1.66 
  12   0   1   -0.11    0.37 
 -12   0  -1    0.83    0.48 
 -13   0  -1    2.53    0.41 
  13   0   1    4.25    0.68 
 -13   0  -1    1.41    0.47 
  14   0   1    4.41    0.60 
 -14   0  -1    4.53    0.50 
 -14   0  -1    3.79    0.60 
  14  -1  -1    0.64    0.29 
 -14  -1   1    0.54    0.19 
 -14  -1   1    0.17    0.28 
 -14   1   1    0.61    0.22 
  14   1  -1    0.30    0.29 
 -14   1   1    0.68    0.30 
 -13  -1   1    0.57    0.37 
  13  -1  -1    0.15    0.40 
 -13  -1   1    1.03    0.28 
 -13   1   1    0.36    0.28 
 -13   1   1    0.01    0.34 
  12  -1  -1    0.78    0.55 
 -12  -1   1    1.17    0.46 
 -12  -1   1    0.98    0.36 
 -12   1   1    1.34    0.50 
  12   1  -1    0.52    0.43 
 -11  -1   1    6.84    0.92 
  11  -1  -1    8.70    0.97 
 -11  -1   1    6.33    1.48 
 -11  -1   1    7.32    1.07 
  11   1  -1    8.37    1.03 
 -11   1   1    8.09    1.52 
 -11   1   1    6.08    1.05 
 -10  -1   1   19.08    2.99 
 -10  -1   1   17.93    2.22 
  10  -1  -1   21.69    2.06 
 -10   1   1   19.04    2.98 
 -10   1   1   18.50    2.20 
  10   1  -1   18.57    2.08 
  10   1  -1   17.62    2.32 
   9  -1  -1   25.03    2.56 
  -9  -1   1   24.75    3.70 
   9   1  -1   22.26    2.56 
  -9   1   1   27.41    3.98 
   8  -1  -1    2.57    0.50 
  -8  -1   1    3.54    0.89 
   8   1  -1    1.67    0.54 
  -8   1   1    1.97    0.85 
  -7  -1   1   -0.01    0.60 
   7  -1  -1    1.09    0.36 
  -7   1   1    0.83    0.66 
  -6   1   1   20.22    3.02 
  -5  -1   1    3.13    0.40 
  -5  -1   1    1.51    0.66 
  -5   1   1    2.68    0.45 
  -5   1   1    2.37    0.69 
  -5   1   1    2.64    0.49 
  -4  -1   1  107.21   11.29 
  -4  -1   1  109.47   10.23 
  -4  -1   1  106.47   11.93 
  -4   1   1  106.80   11.98 
  -4   1   1  109.55   11.34 
  -4   1   1  107.82   10.21 
  -3  -1   1    6.77    0.70 
  -3  -1   1    6.45    0.74 
  -3   1   1    5.92    0.81 
  -3   1   1    6.50    0.84 
  -2  -1   1  319.96   31.43 
  -2  -1   1  303.94   34.71 
   2  -1  -1  337.84   34.76 
  -2  -1   1  379.20   36.73 
  -2   1   1  323.29   36.76 
   1  -1  -1  112.20   12.11 
  -1   1   1  118.98   12.80 
   0  -1   1   78.64    6.72 
   0  -1  -1   81.96    8.79 
   0   1  -1   89.92    8.79 
   0   1   1   85.20    9.29 
  -1  -1  -1  149.84   10.29 
  -1  -1  -1  147.22   15.45 
   1   1   1  165.61   10.29 
  -1   1  -1  128.87   15.45 
  -2  -1  -1   97.66    9.00 
  -2  -1  -1   81.94    8.14 
  -2  -1  -1   89.53    5.99 
  -2   1  -1   82.13    9.01 
  -2   1  -1   78.11    8.14 
  -3  -1  -1    7.04    0.84 
  -3  -1  -1    9.18    0.94 
  -3  -1  -1    8.29    0.62 
  -3   1  -1    7.98    0.98 
  -3   1  -1    7.33    0.85 
  -4  -1  -1  118.32   11.61 
  -4  -1  -1  105.68    7.74 
  -4  -1  -1  107.49   10.51 
  -4   1  -1  111.41   11.63 
  -4   1  -1  110.16   10.49 
  -5  -1  -1  120.97   11.40 
  -5  -1  -1   95.82   14.81 
  -5  -1  -1  109.25   10.32 
  -5   1  -1  106.23   10.30 
  -5   1  -1  110.25   11.42 
  -6  -1  -1   20.29    2.12 
  -6   1  -1   21.90    2.35 
   7  -1   1   13.59    1.54 
  -7  -1  -1   14.25    2.17 
  -7   1  -1   13.48    2.20 
   8  -1   1   17.09    1.80 
   8  -1   1   15.79    2.35 
   8   1   1   14.08    1.83 
  -8   1  -1   18.12    2.62 
  -9  -1  -1    6.42    1.48 
   9  -1   1    6.60    1.41 
   9  -1   1    7.63    0.99 
   9   1   1    7.37    1.01 
  -9   1  -1    6.52    1.46 
 -10  -1  -1    2.62    1.07 
  10  -1   1    4.00    0.65 
 -10  -1  -1    3.17    0.71 
  10   1   1    2.78    0.69 
 -10   1  -1    3.25    1.13 
 -10   1  -1    2.54    0.68 
 -11  -1  -1    0.93    0.43 
  11  -1   1    0.60    0.44 
 -11  -1  -1    0.81    0.52 
 -11   1  -1    0.98    0.50 
 -11   1  -1    1.14    0.86 
  11   1   1    0.56    0.50 
 -12  -1  -1    1.93    0.45 
  12  -1   1    1.42    0.66 
 -12  -1  -1    1.70    0.54 
  12   1   1    4.30    0.60 
 -12   1  -1    3.22    0.64 
 -13  -1  -1    2.92    0.65 
 -13  -1  -1    4.74    0.55 
  13  -1   1    5.51    0.77 
 -13   1  -1    3.39    0.64 
 -13   1  -1    4.85    0.57 
 -14  -1  -1    0.89    0.20 
  14  -1   1    0.61    0.29 
 -14  -1  -1    0.72    0.31 
 -14   1  -1    0.73    0.23 
  14   1   1    0.83    0.35 
 -14   1  -1    0.64    0.30 
  14  -2  -1    0.46    0.23 
 -14  -2   1    0.24    0.27 
 -14   2   1    0.10    0.20 
 -14   2   1    0.68    0.29 
 -13  -2   1    0.58    0.39 
  13  -2  -1    0.54    0.38 
 -13  -2   1    0.61    0.25 
 -13   2   1    0.86    0.39 
 -12  -2   1    3.44    0.73 
  12  -2  -1    5.77    0.85 
 -12  -2   1    4.69    0.62 
  12   2  -1    5.86    0.77 
 -12   2   1    4.86    0.79 
 -11  -2   1   -0.66    0.39 
  11  -2  -1    0.48    0.57 
 -11  -2   1    2.96    0.93 
 -11  -2   1    1.21    0.37 
  11   2  -1   -0.29    0.43 
  11   2  -1    0.93    0.66 
 -11   2   1    1.14    0.89 
 -11   2   1   -0.16    0.46 
  10  -2  -1   15.64    1.52 
 -10  -2   1   10.59    1.66 
 -10  -2   1   13.98    1.47 
 -10  -2   1   14.62    2.29 
 -10  -2   1   13.46    1.68 
  10   2  -1   14.03    1.61 
 -10   2   1   13.85    1.69 
  10   2  -1   11.16    1.74 
 -10   2   1   12.81    2.28 
   9  -2  -1    2.53    0.49 
  -9  -2   1    1.66    0.92 
   9   2  -1    2.54    0.63 
  -9   2   1    0.60    0.93 
  -8  -2   1   15.08    2.59 
   8  -2  -1   17.76    1.79 
  -8   2   1   16.56    2.61 
  -7  -2   1   14.11    2.32 
   7  -2  -1   12.47    1.58 
  -7   2   1   18.88    2.38 
  -6  -2   1   16.49    1.53 
  -6  -2   1   14.50    2.24 
  -6   2   1   12.90    1.70 
  -5  -2   1   23.88    3.62 
  -5  -2   1   24.05    2.40 
  -5   2   1   24.96    2.70 
  -5   2   1   21.58    3.55 
  -5   2   1   26.40    2.83 
  -4  -2   1   25.00    1.71 
  -4  -2   1   24.18    2.32 
  -4   2   1   22.88    2.61 
  -4   2   1   22.32    2.72 
  -3  -2   1   58.40    3.80 
  -3  -2   1   52.28    5.16 
  -3   2   1   51.33    6.05 
   2  -2  -1   19.31    2.13 
  -2  -2   1   18.61    1.87 
  -2   2   1   19.73    2.21 
  -1  -2   1   94.55    6.18 
  -1  -2   1   85.24    8.41 
   1  -2  -1   87.10    9.32 
   1   2  -1   80.12    9.27 
   1   2  -1   96.07    6.18 
   0  -2  -1   52.75    5.73 
   0   2   1   57.97    6.05 
   0   2  -1   51.99    5.71 
  -1  -2  -1   13.60    1.29 
  -1  -2  -1   10.77    1.16 
   1   2   1   11.94    1.32 
  -1   2  -1   10.27    1.30 
  -2  -2  -1   58.87    5.69 
  -2  -2  -1   48.31    5.14 
  -2  -2  -1   53.90    3.79 
  -2   2  -1   52.30    5.72 
   2   2   1   56.60    3.79 
  -3  -2  -1  144.08   13.48 
  -3  -2  -1  146.36    9.93 
  -3  -2  -1  140.03   14.88 
  -3   2  -1  139.07   13.46 
  -3   2  -1  142.00   14.92 
  -4  -2  -1  125.81   11.24 
  -4  -2  -1  124.74   12.41 
  -4  -2  -1  120.98    8.28 
  -4   2  -1  112.88   12.44 
  -4   2  -1  108.02   11.21 
  -5  -2  -1   64.70    6.75 
  -5  -2  -1   67.86    6.13 
  -5  -2  -1   61.28    7.12 
  -5  -2  -1   59.64    8.81 
  -5   2  -1   65.91    6.80 
  -6  -2  -1   94.85   13.66 
  -6  -2  -1   98.50   11.04 
  -6  -2  -1  107.28    9.50 
  -6   2  -1   96.62   10.51 
   7  -2   1    5.39    0.73 
  -7  -2  -1    4.61    0.71 
  -7  -2  -1    6.16    1.18 
  -7   2  -1    5.57    1.15 
   8  -2   1    8.68    1.57 
   8  -2   1    9.70    1.13 
  -8  -2  -1    9.56    1.67 
  -8   2  -1    8.44    1.66 
   9  -2   1   25.20    2.54 
   9  -2   1   23.87    3.32 
  -9  -2  -1   26.31    3.71 
  -9   2  -1   24.61    3.68 
   9   2   1   20.98    2.56 
  10  -2   1    2.15    0.96 
 -10  -2  -1    2.11    0.49 
  10  -2   1    1.97    0.51 
 -10  -2  -1    2.57    0.67 
 -10   2  -1    2.03    0.60 
  10   2   1    1.83    0.63 
 -10   2  -1    1.90    1.05 
 -11  -2  -1    1.95    0.62 
  11  -2   1    3.19    0.77 
 -11  -2  -1    2.41    0.51 
  11   2   1    3.50    0.70 
 -11   2  -1    4.31    1.13 
 -11   2  -1    1.99    0.62 
 -12  -2  -1    3.15    0.75 
  12  -2   1    5.03    0.88 
 -12  -2  -1    5.94    0.68 
 -12   2  -1    6.74    0.88 
  12   2   1    4.82    0.77 
 -13  -2  -1    2.13    0.34 
 -13  -2  -1    1.77    0.47 
  13  -2   1    2.29    0.51 
 -13   2  -1    1.96    0.50 
  14  -2   1    2.01    0.34 
 -14  -2  -1    1.62    0.38 
 -14   2  -1    2.49    0.34 
 -14   2  -1    1.58    0.37 
 -14  -3   1    0.13    0.26 
 -14   3   1    0.42    0.27 
 -13  -3   1    1.26    0.39 
 -13  -3   1    0.65    0.23 
  13  -3  -1    0.76    0.36 
 -13   3   1    0.66    0.38 
 -12  -3   1    0.49    0.28 
  12  -3  -1    0.31    0.44 
 -12  -3   1    0.20    0.37 
  12   3  -1   -0.40    0.58 
  12   3  -1   -0.08    0.41 
 -12   3   1   -0.30    0.43 
 -11  -3   1    1.22    0.49 
  11  -3  -1    0.91    0.55 
 -11  -3   1    1.16    0.36 
 -11   3   1    1.39    0.91 
  11   3  -1    0.50    0.68 
  11   3  -1    1.09    0.51 
 -11   3   1    0.99    0.53 
 -10  -3   1   11.28    1.22 
 -10  -3   1   11.70    1.43 
  10  -3  -1    8.28    1.33 
 -10  -3   1   10.68    1.43 
 -10  -3   1    9.58    1.95 
 -10   3   1   13.73    1.47 
  10   3  -1   10.48    1.36 
 -10   3   1    8.90    1.94 
   9  -3  -1   12.46    1.23 
  -9  -3   1    9.87    1.91 
  -9   3   1    8.89    1.89 
   8  -3  -1    0.69    0.34 
   8  -3  -1    1.18    0.74 
  -8  -3   1    0.36    0.75 
  -8   3   1    2.14    0.88 
  -7  -3   1    8.60    1.45 
   7  -3  -1    6.92    0.90 
  -7  -3   1    7.70    0.96 
  -7   3   1    8.93    1.44 
  -6  -3   1    6.71    1.32 
  -6  -3   1    5.21    0.81 
  -6   3   1    6.54    0.99 
  -6   3   1    8.43    1.03 
  -6   3   1    8.62    1.31 
  -5  -3   1    0.96    0.26 
  -5  -3   1    1.26    0.56 
  -5   3   1    0.54    0.34 
  -5   3   1    1.14    0.41 
  -4  -3   1   75.51    8.52 
  -4  -3   1   76.21    5.38 
  -4  -3   1   79.58    7.31 
  -4   3   1   75.64    8.13 
  -4   3   1   75.86    8.57 
  -3  -3   1   11.04    0.81 
  -3  -3   1   11.83    1.11 
  -3   3   1    8.36    1.34 
  -2  -3   1  210.99   14.27 
   2  -3  -1  208.81   21.48 
  -2  -3   1  200.05   19.39 
  -2   3   1  200.22   22.69 
   1  -3  -1  159.99   16.65 
  -1  -3   1  143.62   15.03 
  -1  -3   1  179.53   12.71 
   1   3  -1  176.14   11.05 
  -1   3   1  150.71   17.59 
   1   3  -1  144.12   16.59 
   0  -3  -1   62.22    5.84 
   0  -3  -1   51.81    5.23 
   0  -3  -1   57.74    4.42 
   0   3   1   54.72    6.14 
   0   3  -1   50.83    5.81 
  -1  -3  -1   48.30    4.82 
  -1  -3  -1   43.55    4.35 
   1  -3   1   49.83    3.69 
  -1  -3  -1   46.28    3.67 
   1   3   1   47.67    3.21 
   1   3   1   43.70    5.07 
  -1   3  -1   40.82    4.84 
  -2  -3  -1  124.84   11.83 
  -2  -3  -1  108.28   10.70 
  -2  -3  -1  111.99    7.88 
   2   3   1  113.96    7.88 
  -2   3  -1  104.13   11.86 
  -3  -3  -1   77.79    7.39 
  -3  -3  -1   65.57    4.93 
  -3  -3  -1   68.14    6.70 
   3   3   1   69.73    4.93 
  -3   3  -1   69.11    7.44 
  -4  -3  -1   13.73    1.43 
  -4  -3  -1   15.17    1.53 
  -4   3  -1   13.46    1.61 
  -4   3  -1   12.65    1.37 
  -5  -3  -1    6.94    0.79 
  -5  -3  -1    5.71    0.89 
   5  -3   1    6.06    0.97 
  -5  -3  -1    7.18    1.18 
  -5   3  -1    6.35    0.93 
  -6  -3  -1   14.75    1.51 
  -6  -3  -1   13.48    1.78 
  -6  -3  -1   15.58    2.29 
  -6   3  -1   14.14    1.76 
  -6   3  -1   13.41    1.85 
   7  -3   1   12.65    1.46 
  -7  -3  -1   15.01    2.16 
  -7  -3  -1   13.02    1.46 
  -7   3  -1   15.53    2.19 
  -7   3  -1   11.55    1.66 
  -8  -3  -1    4.32    1.10 
   8  -3   1    3.83    1.09 
   8  -3   1    4.58    0.65 
   9  -3   1    0.38    0.77 
   9  -3   1    0.74    0.38 
  -9   3  -1    0.87    0.90 
  10  -3   1   12.09    1.26 
 -10  -3  -1   11.35    1.48 
  10  -3   1   11.52    1.49 
 -10  -3  -1   10.66    1.27 
  10  -3   1    9.99    1.88 
 -10   3  -1   10.64    2.06 
  10   3   1   14.46    1.52 
 -10   3  -1   11.20    1.49 
  11  -3   1   10.65    1.89 
  11  -3   1   12.47    1.48 
 -11  -3  -1   11.73    1.26 
 -11  -3  -1   13.43    1.50 
 -11   3  -1   11.69    1.48 
 -11   3  -1    9.47    2.03 
  11   3   1   10.39    1.41 
 -12  -3  -1    0.25    0.26 
  12  -3   1    1.12    0.55 
 -12  -3  -1    0.33    0.41 
  12   3   1    0.25    0.46 
 -12   3  -1    0.21    0.44 
  13  -3   1    3.56    0.58 
 -13  -3  -1    3.85    0.60 
 -13  -3  -1    3.37    0.42 
 -13   3  -1    2.45    0.58 
 -14  -3  -1    2.17    0.39 
 -14   3  -1    1.71    0.38 
 -14  -4   1    1.49    0.35 
  13  -4  -1    0.12    0.28 
 -13  -4   1    0.39    0.34 
 -13   4   1    0.51    0.35 
  13   4  -1    0.97    0.51 
 -12  -4   1    1.90    0.48 
  12  -4  -1    1.07    0.45 
 -12  -4   1    0.52    0.27 
 -12   4   1    0.72    0.45 
  12   4  -1    0.31    0.56 
  12   4  -1    0.64    0.44 
 -11  -4   1    0.06    0.44 
 -11  -4   1    0.26    0.53 
  11  -4  -1    0.41    0.46 
 -11  -4   1    0.21    0.27 
 -11   4   1   -0.16    0.45 
 -11   4   1    1.08    0.88 
  11   4  -1   -0.46    0.49 
  11   4  -1   -0.28    0.61 
 -10  -4   1   13.66    1.38 
 -10  -4   1   14.13    1.71 
  10  -4  -1   12.75    2.05 
  10  -4  -1   13.73    1.59 
 -10  -4   1   13.52    1.70 
 -10   4   1   11.43    2.29 
 -10   4   1   13.82    1.69 
  -9  -4   1   19.30    2.09 
  -9  -4   1   22.38    3.34 
   9  -4  -1   20.77    2.96 
   9  -4  -1   21.89    2.31 
  -9   4   1   23.72    3.33 
  -8  -4   1    2.01    0.88 
   8  -4  -1    1.28    0.79 
  -8   4   1    3.22    0.99 
  -7  -4   1   64.48    8.78 
  -7  -4   1   57.64    6.02 
   7  -4  -1   63.73    6.05 
  -7   4   1   63.83    8.76 
   6  -4  -1    9.57    1.37 
  -6  -4   1   10.21    1.67 
  -6  -4   1    8.49    1.05 
  -6   4   1   10.47    1.61 
  -6   4   1    8.38    1.27 
  -6   4   1    8.15    1.26 
   5  -4  -1  103.24   12.37 
  -5  -4   1  113.62   10.15 
  -5  -4   1  100.76   14.57 
  -5  -4   1  109.78   11.82 
  -5   4   1  101.77   11.89 
  -5   4   1  108.70   11.28 
  -4  -4   1    0.91    0.19 
  -4  -4   1    1.03    0.25 
  -4  -4   1    0.75    0.29 
  -4  -4   1    1.82    0.52 
  -4   4   1    0.78    0.35 
  -4   4   1    1.49    0.44 
  -3  -4   1    2.03    0.35 
  -3   4   1    2.92    0.51 
   2  -4  -1   43.21    4.41 
   2   4  -1   43.09    2.88 
  -2   4   1   36.21    4.61 
   1  -4  -1  213.48   22.42 
  -1  -4   1  214.48   20.25 
  -1  -4   1  221.44   17.12 
   1   4  -1  222.40   14.89 
  -1   4   1  197.87   23.69 
   0  -4   1  141.17   11.07 
   0  -4   1  143.53   13.09 
   0  -4  -1  138.37   11.05 
   0  -4  -1  144.62   14.51 
   0   4   1  133.02   15.31 
   0   4  -1  128.97   14.48 
  -1  -4  -1   58.04    5.73 
  -1  -4  -1   58.38    4.83 
  -1  -4  -1   60.89    6.36 
   1  -4   1   60.77    4.86 
  -1   4  -1   60.86    6.38 
   1   4   1   63.30    4.23 
   1   4   1   59.90    6.69 
  -2  -4  -1   83.52    8.43 
  -2  -4  -1   82.01    7.64 
   2   4   1   82.08    5.62 
  -2   4  -1   76.88    8.48 
   2   4   1   77.03    8.87 
  -3  -4  -1  108.31   10.50 
  -3  -4  -1   98.72    7.01 
   3   4   1   94.87    7.00 
  -3   4  -1   97.31   10.57 
  -4  -4  -1    2.43    0.55 
  -4  -4  -1    4.29    0.52 
  -4   4  -1    4.90    0.70 
  -5  -4  -1    1.30    0.61 
  -5  -4  -1    1.10    0.38 
   5  -4   1    0.07    0.36 
  -5  -4  -1    0.77    0.28 
  -5   4  -1    0.82    0.40 
   6  -4   1   23.11    2.79 
  -6  -4  -1   24.05    2.31 
  -6  -4  -1   22.17    2.69 
  -6  -4  -1   22.37    3.34 
  -6   4  -1   23.20    2.59 
  -6   4  -1   21.39    2.72 
   7  -4   1    8.61    0.99 
  -7  -4  -1    9.85    1.29 
  -7  -4  -1    9.40    1.10 
  -7   4  -1    7.40    1.20 
   8  -4   1    0.09    0.28 
  -8  -4  -1    0.72    0.37 
   8  -4   1    0.57    0.74 
  -8   4  -1    0.64    0.86 
   9  -4   1   23.54    2.44 
  -9  -4  -1   21.56    2.21 
   9  -4   1   22.96    3.18 
  -9   4  -1   23.45    3.49 
 -10  -4  -1    0.49    0.59 
  10  -4   1    1.26    0.58 
 -10  -4  -1    0.59    0.33 
  10  -4   1    1.39    0.86 
 -10  -4  -1    0.65    0.50 
 -10   4  -1   -0.23    0.94 
 -10   4  -1    0.59    0.50 
  11  -4   1    8.50    1.17 
 -11  -4  -1    8.37    1.21 
 -11  -4  -1    9.35    0.97 
 -11  -4  -1    8.23    1.18 
  11  -4   1    9.64    1.64 
 -11   4  -1    9.70    1.22 
  11   4   1    7.22    1.15 
 -11   4  -1    7.11    1.72 
 -12  -4  -1    1.12    0.45 
 -12  -4  -1    0.95    0.27 
  12  -4   1    0.98    0.49 
  12   4   1    1.20    0.50 
 -12   4  -1    1.18    0.49 
 -13  -4  -1    0.79    0.37 
  13  -4   1    0.85    0.33 
 -13   4  -1    0.97    0.40 
 -14   4  -1   -0.14    0.23 
 -13  -5   1    0.22    0.34 
  13   5  -1   -0.23    0.43 
 -13   5   1   -0.12    0.31 
  12  -5  -1   -0.02    0.33 
 -12  -5   1   -0.08    0.18 
 -12  -5   1   -0.38    0.37 
 -12   5   1   -0.02    0.42 
  12   5  -1   -0.30    0.53 
  12   5  -1    0.49    0.43 
 -11  -5   1    1.69    0.35 
 -11  -5   1    1.02    0.50 
 -11  -5   1    1.30    0.58 
  11  -5  -1    2.06    0.52 
 -11   5   1    1.14    0.52 
 -11   5   1    3.59    1.04 
 -10  -5   1    2.60    0.63 
 -10  -5   1    3.62    0.71 
  10  -5  -1    2.47    0.90 
  10  -5  -1    2.18    0.57 
 -10  -5   1    1.38    0.38 
 -10   5   1    3.22    0.65 
 -10   5   1    1.49    1.04 
   9  -5  -1    2.38    0.87 
  -9  -5   1    1.33    0.65 
  -9  -5   1    2.15    0.61 
  -9  -5   1    2.07    0.42 
   9  -5  -1    2.12    0.61 
  -9   5   1    2.65    1.04 
  -9   5   1    1.55    0.60 
   8  -5  -1    3.99    1.12 
  -8   5   1    6.87    1.37 
  -7  -5   1    1.53    0.79 
  -7  -5   1    2.00    0.44 
  -7   5   1    0.23    0.52 
  -7   5   1    1.67    0.83 
  -6  -5   1   11.54    1.82 
   6  -5  -1   12.22    1.60 
  -6  -5   1   11.59    1.25 
  -6   5   1    9.83    1.47 
  -6   5   1    8.24    1.40 
  -5  -5   1    7.63    0.78 
   5  -5  -1    5.32    0.96 
  -5  -5   1    6.66    0.88 
  -5   5   1    4.83    0.90 
  -5   5   1    3.53    0.86 
  -4  -5   1   56.26    5.28 
   4  -5  -1   52.63    6.45 
  -4  -5   1   57.74    6.16 
  -4   5   1   53.29    5.91 
  -4   5   1   53.37    6.22 
  -3  -5   1   13.19    1.32 
  -3  -5   1   11.78    1.56 
  -3   5   1   13.39    1.61 
  -1  -5   1   75.62    5.94 
   1  -5  -1   68.53    6.97 
   1  -5  -1   76.79    7.81 
  -1  -5   1   76.94    7.01 
   1   5  -1   75.43    5.14 
  -1   5   1   69.63    8.23 
   0  -5  -1   21.97    2.14 
   0  -5  -1   22.49    1.81 
   0  -5   1   24.66    2.15 
   0  -5   1   23.33    1.84 
   0  -5  -1   24.72    2.45 
   0   5   1   19.63    2.54 
   0   5  -1   18.07    2.39 
  -1  -5  -1  100.34   10.19 
   1  -5   1  107.53    8.63 
  -1  -5  -1  108.38   11.30 
   1   5   1  114.76    7.51 
   1   5   1  108.10   11.91 
  -1   5  -1  105.55   11.31 
  -2  -5  -1   13.63    1.32 
  -2  -5  -1   16.01    1.59 
  -2  -5  -1   15.00    1.75 
  -2   5  -1   15.12    1.82 
   2   5   1   17.70    1.16 
   2   5   1   16.36    1.78 
  -3  -5  -1   66.71    5.92 
  -3  -5  -1   63.47    6.51 
  -3  -5  -1   59.05    6.88 
  -3   5  -1   56.34    6.58 
  -4  -5  -1   10.46    1.41 
   4  -5   1   10.67    1.44 
  -4  -5  -1   11.06    1.19 
  -4   5  -1   12.07    1.48 
  -5  -5  -1   28.92    3.42 
  -5  -5  -1   30.82    2.94 
   5  -5   1   28.24    3.57 
  -5   5  -1   30.69    3.32 
  -6  -5  -1   11.36    1.46 
  -6  -5  -1    9.70    1.21 
   6  -5   1   10.61    1.52 
  -6   5  -1    9.38    1.42 
  -6   5  -1   11.20    1.53 
  -7  -5  -1    4.80    0.70 
   7  -5   1    3.58    1.06 
  -7  -5  -1    5.57    0.87 
   7  -5   1    4.79    0.88 
  -7   5  -1    3.97    0.83 
  -8  -5  -1    5.47    0.80 
   8  -5   1    2.92    1.08 
  -8   5  -1    6.39    1.27 
   9  -5   1    6.26    1.11 
  -9  -5  -1    2.74    0.73 
   9  -5   1    2.86    0.71 
  -9  -5  -1    3.29    0.53 
  -9  -5  -1    4.21    0.76 
  -9   5  -1    3.25    1.19 
  -9   5  -1    3.05    0.76 
 -10  -5  -1    2.76    0.66 
 -10  -5  -1    2.76    0.75 
  10  -5   1    2.89    1.03 
  10  -5   1    2.42    0.64 
 -10  -5  -1    3.06    0.47 
 -10   5  -1    2.76    0.68 
 -10   5  -1    2.19    1.17 
 -11  -5  -1    1.41    0.32 
 -11  -5  -1    0.94    0.54 
  11  -5   1    1.15    0.91 
  11  -5   1    1.40    0.51 
 -11  -5  -1    1.55    0.54 
 -11   5  -1    0.81    0.52 
 -12  -5  -1    0.80    0.24 
  12  -5   1    0.43    0.66 
 -12  -5  -1    0.69    0.44 
  12  -5   1    1.37    0.43 
  12   5   1    2.03    0.54 
  12   5   1    1.64    0.63 
 -12   5  -1    1.49    0.50 
 -13  -5  -1   -0.11    0.33 
 -13   5  -1   -0.09    0.34 
 -13  -6   1    0.49    0.34 
  13   6  -1    0.98    0.45 
 -13   6   1    0.54    0.33 
  12  -6  -1    2.77    0.42 
 -12  -6   1    2.79    0.56 
 -12   6   1    2.02    0.56 
  12   6  -1    2.12    0.65 
  12   6  -1    2.34    0.60 
 -11  -6   1    6.82    0.74 
  11  -6  -1    7.96    0.89 
 -11  -6   1    6.53    1.00 
  11  -6  -1    6.92    1.34 
 -11  -6   1    5.96    0.98 
 -11   6   1    6.28    0.99 
 -10  -6   1    3.45    0.74 
  10  -6  -1    4.74    0.69 
 -10  -6   1    3.28    0.76 
 -10  -6   1    4.49    0.53 
  10  -6  -1    2.32    1.03 
  10  -6  -1    3.25    1.03 
 -10   6   1    3.42    1.19 
 -10   6   1    3.52    0.74 
  -9  -6   1    5.33    0.62 
   9  -6  -1    3.67    0.71 
   9  -6  -1    3.50    1.14 
   9  -6  -1    5.36    1.15 
  -9  -6   1    5.05    0.87 
  -9  -6   1    4.85    0.90 
  -9   6   1    4.76    0.85 
  -9   6   1    5.13    1.31 
   8  -6  -1   25.04    3.12 
  -8  -6   1   19.04    2.29 
  -8   6   1   24.33    3.47 
   7  -6  -1    3.93    0.96 
  -7  -6   1    3.88    0.61 
   7  -6  -1    3.90    0.81 
  -7   6   1    2.59    0.71 
  -7   6   1    2.29    1.01 
   6  -6  -1   27.63    3.40 
  -6  -6   1   29.10    3.25 
  -6  -6   1   29.76    2.78 
  -6   6   1   25.14    3.28 
  -6   6   1   25.20    3.14 
  -5  -6   1   14.68    1.90 
  -5  -6   1   14.30    1.60 
   5  -6  -1   16.55    2.13 
  -5   6   1   17.19    2.01 
  -5   6   1   15.42    2.03 
  -4  -6   1   13.48    1.47 
   4  -6  -1   12.94    1.82 
  -4  -6   1   15.80    1.76 
  -4   6   1   13.68    1.88 
  -4   6   1   14.99    1.84 
   3  -6  -1   62.81    7.70 
  -3  -6   1   65.12    7.34 
  -3  -6   1   67.38    6.30 
  -3  -6   1   63.28    5.33 
  -3   6   1   70.24    7.44 
   2  -6  -1   10.04    1.33 
  -2  -6   1    9.98    1.05 
  -2  -6   1    7.75    0.91 
  -2   6   1   11.90    1.40 
   2   6  -1   10.37    0.75 
  -1  -6   1  113.30    8.95 
  -1  -6   1  109.05   10.57 
   1  -6  -1  106.26   10.53 
   1  -6  -1  118.37   11.76 
  -1   6   1  110.26   12.40 
   1   6  -1  112.65    7.77 
   0  -6  -1   75.88    6.13 
   0  -6  -1   76.06    7.25 
   0  -6   1   73.77    6.15 
   0  -6   1   80.49    7.25 
   0  -6  -1   75.13    8.08 
   0   6   1   77.44    8.52 
   0   6  -1   73.93    8.05 
  -1  -6  -1   20.43    2.44 
   1  -6   1   22.11    1.86 
  -1  -6  -1   21.59    2.17 
  -1  -6  -1   22.43    1.83 
  -1   6  -1   23.18    2.47 
   1   6   1   22.00    1.60 
   1   6   1   22.88    2.53 
  -2  -6  -1   55.08    6.11 
  -2  -6  -1   54.48    5.80 
  -2  -6  -1   58.50    5.24 
  -2  -6  -1   55.25    4.41 
   2   6   1   52.82    6.07 
  -2   6  -1   50.83    5.84 
   3  -6   1    1.44    0.43 
  -3  -6  -1    1.29    0.36 
  -3  -6  -1    1.29    0.27 
  -3  -6  -1    0.78    0.28 
  -3  -6  -1    1.44    0.34 
  -3   6  -1    0.49    0.40 
  -4  -6  -1   39.65    4.33 
  -4  -6  -1   39.66    3.71 
   4  -6   1   36.36    4.51 
  -4   6  -1   35.17    4.16 
  -5  -6  -1    2.85    0.49 
   5  -6   1    2.50    0.60 
  -5  -6  -1    1.76    0.47 
  -5   6  -1    1.68    0.56 
  -6  -6  -1   22.32    2.33 
  -6  -6  -1   25.23    2.73 
   6  -6   1   22.91    2.82 
  -6   6  -1   19.78    2.61 
  -6   6  -1   22.81    2.79 
   7  -6   1   13.82    2.02 
  -7  -6  -1   11.44    1.48 
  -7  -6  -1   11.62    1.73 
   7  -6   1   13.19    1.83 
  -7   6  -1   16.05    1.81 
   8  -6   1    8.90    1.57 
  -8  -6  -1    8.27    1.09 
  -8   6  -1    7.93    1.62 
  -9  -6  -1   14.25    1.68 
   9  -6   1   12.14    1.49 
   9  -6   1   14.59    2.16 
  -9  -6  -1   13.82    1.68 
  -9  -6  -1   12.55    1.32 
  -9   6  -1   12.27    1.65 
  -9   6  -1   12.64    2.31 
 -10  -6  -1    4.33    0.87 
 -10  -6  -1    5.27    0.83 
  10  -6   1    4.56    1.19 
  10  -6   1    4.09    0.75 
 -10  -6  -1    4.53    0.57 
 -10   6  -1    4.59    0.82 
 -10   6  -1    3.72    1.32 
  11  -6   1    1.97    0.89 
 -11  -6  -1    0.76    0.54 
 -11  -6  -1    0.08    0.45 
 -11  -6  -1    1.08    0.25 
  11  -6   1    0.93    0.41 
 -11   6  -1    0.42    0.50 
  12  -6   1    2.52    0.76 
  12  -6   1    2.50    0.42 
 -12  -6  -1    1.98    0.57 
 -12  -6  -1    2.61    0.55 
  12   6   1    1.49    0.58 
 -12   6  -1    2.15    0.55 
  12   6   1    1.60    0.64 
 -13  -6  -1    0.72    0.36 
 -13   6  -1    0.73    0.35 
 -13  -7   1    0.36    0.32 
 -13   7   1    0.83    0.32 
  13   7  -1    0.42    0.41 
 -12  -7   1    1.18    0.45 
 -12   7   1    1.78    0.49 
  12   7  -1    1.21    0.56 
 -11  -7   1    8.34    1.11 
  11  -7  -1    6.00    1.38 
 -11  -7   1    8.07    1.12 
  11  -7  -1    8.03    0.88 
  11  -7  -1    7.70    1.27 
 -11   7   1    7.87    1.09 
  10  -7  -1   12.96    1.34 
 -10  -7   1   12.43    1.24 
  10  -7  -1   13.43    1.90 
  10  -7  -1   15.34    2.07 
 -10  -7   1   14.02    1.64 
 -10  -7   1   13.34    1.63 
 -10   7   1    9.36    2.18 
 -10   7   1   12.48    1.59 
   9  -7  -1    2.15    0.88 
  -9  -7   1    3.06    0.41 
   9  -7  -1    2.70    0.52 
   9  -7  -1    2.68    0.94 
  -9  -7   1    2.44    0.66 
  -9  -7   1    2.33    0.66 
  -9   7   1    2.27    0.66 
  -9   7   1    2.82    1.12 
  -8  -7   1    9.30    1.24 
   8  -7  -1    8.34    1.61 
  -8   7   1   12.16    1.90 
   7  -7  -1   22.91    2.68 
  -7  -7   1   18.67    1.94 
   7  -7  -1   17.48    2.35 
  -7   7   1   18.29    2.85 
  -7   7   1   14.64    2.27 
  -6  -7   1   41.96    5.03 
   6  -7  -1   44.99    5.30 
  -6  -7   1   43.58    4.32 
  -6   7   1   47.97    5.16 
  -6   7   1   41.78    4.88 
  -5  -7   1    6.79    0.79 
   5  -7  -1    7.13    1.06 
  -5  -7   1    4.82    0.84 
  -5   7   1    4.43    0.95 
  -5   7   1    4.38    0.93 
   4  -7  -1   24.32    3.20 
  -4  -7   1   24.84    2.21 
  -4  -7   1   28.76    2.61 
  -4  -7   1   24.96    3.04 
  -4   7   1   26.87    3.13 
  -4   7   1   26.66    2.99 
  -3  -7   1    5.11    0.67 
  -3  -7   1    4.75    0.60 
  -3  -7   1    6.05    0.82 
   3  -7  -1    5.93    0.94 
  -3   7   1    4.68    0.94 
  -2  -7   1   72.01    8.30 
  -2  -7   1   74.83    7.13 
  -2  -7   1   77.31    6.05 
   2  -7  -1   75.22    7.97 
   2  -7  -1   72.18    8.72 
   2   7  -1   75.24    5.23 
  -2   7   1   75.04    8.40 
   1  -7  -1   19.97    2.32 
   1  -7  -1   19.12    1.96 
  -1  -7   1   19.88    1.73 
  -1  -7   1   20.43    2.00 
   1   7  -1   19.75    2.24 
  -1   7   1   21.58    2.43 
   1   7  -1   21.25    1.46 
   0  -7   1   24.13    2.11 
   0  -7   1   20.78    1.81 
   0  -7  -1   22.40    2.43 
   0  -7  -1   21.05    2.10 
   0   7  -1   19.31    2.37 
   0   7   1   20.41    2.51 
  -1  -7  -1   34.13    4.07 
  -1  -7  -1   37.75    2.94 
  -1  -7  -1   35.59    3.47 
  -1  -7  -1   33.53    3.89 
   1   7   1   37.34    4.07 
  -1   7  -1   36.69    3.92 
  -2  -7  -1    3.63    0.61 
   2  -7   1    3.94    0.69 
  -2  -7  -1    3.17    0.50 
  -2  -7  -1    3.65    0.44 
  -2  -7  -1    4.35    0.62 
  -2   7  -1    4.02    0.70 
  -3  -7  -1    2.99    0.54 
  -3  -7  -1    2.20    0.38 
  -3  -7  -1    2.97    0.46 
  -3   7  -1    3.01    0.63 
   4  -7   1   38.84    4.81 
  -4  -7  -1   41.25    4.60 
  -4  -7  -1   40.68    3.95 
  -4   7  -1   40.28    4.45 
  -5  -7  -1   14.17    1.75 
  -5  -7  -1   12.64    1.48 
   5  -7   1   13.91    1.86 
  -5   7  -1   11.06    1.73 
   6  -7   1   11.79    1.70 
  -6  -7  -1   11.31    1.35 
  -6  -7  -1   10.56    1.55 
  -6   7  -1   12.75    1.64 
  -6   7  -1   12.21    1.76 
  -7  -7  -1    1.61    0.58 
   7  -7   1    2.32    0.66 
   7  -7   1    3.47    0.93 
  -7  -7  -1    1.67    0.50 
   8  -7   1    0.55    0.75 
   8  -7   1    1.45    0.47 
  -8  -7  -1    1.05    0.45 
  -9  -7  -1    1.78    0.61 
   9  -7   1    0.11    0.87 
   9  -7   1    2.35    0.92 
  -9  -7  -1    2.16    0.65 
   9  -7   1    1.94    0.52 
  -9  -7  -1    2.41    0.36 
  -9   7  -1    1.99    0.66 
  -9   7  -1    2.58    1.19 
  10  -7   1    2.14    0.98 
 -10  -7  -1    1.72    0.28 
 -10  -7  -1    1.19    0.58 
 -10  -7  -1    0.21    0.57 
  10  -7   1    1.57    0.47 
 -10   7  -1    2.32    0.60 
 -10   7  -1    3.64    1.13 
 -11  -7  -1    4.65    0.75 
  11  -7   1    3.83    0.56 
  11  -7   1    3.36    0.96 
 -11  -7  -1    4.71    0.79 
 -11   7  -1    4.42    0.78 
 -12  -7  -1    3.45    0.67 
  12  -7   1    4.70    1.04 
 -12  -7  -1    4.85    0.73 
 -12   7  -1    3.81    0.68 
  12   7   1    4.87    0.81 
 -13  -7  -1   -0.12    0.31 
 -13   7  -1    0.02    0.31 
 -13  -8   1    1.49    0.37 
  13   8  -1    1.22    0.41 
 -12  -8   1    1.28    0.47 
  12   8  -1    1.48    0.54 
 -12   8   1    1.88    0.48 
 -11  -8   1    4.67    0.89 
  11  -8  -1    4.84    1.09 
 -11  -8   1    6.45    0.93 
  11  -8  -1    8.35    1.31 
 -11   8   1    7.76    0.96 
  10  -8  -1    2.95    0.96 
 -10  -8   1    2.67    0.68 
 -10  -8   1    3.52    0.72 
  10  -8  -1    3.04    1.00 
 -10   8   1    4.34    0.75 
 -10   8   1    2.68    1.18 
   9  -8  -1    6.03    1.23 
   9  -8  -1    5.56    1.26 
  -9  -8   1    4.03    0.91 
  -9  -8   1    6.58    0.88 
   9  -8  -1    6.42    0.72 
  -9  -8   1    4.62    0.89 
  -9   8   1    6.33    0.94 
  -9   8   1    5.26    1.45 
   8  -8  -1   10.82    1.48 
   8  -8  -1   11.26    1.74 
   8  -8  -1   10.95    1.12 
   8  -8  -1    8.79    1.68 
  -8  -8   1   10.07    1.30 
  -8  -8   1    8.37    1.32 
   8  -8  -1   10.23    1.61 
  -8   8   1   11.75    1.98 
  -7  -8   1    5.79    0.89 
   7  -8  -1    8.10    1.34 
   7  -8  -1    6.72    1.19 
  -7   8   1    5.67    1.43 
   6  -8  -1    6.23    1.26 
   6  -8  -1   10.60    1.34 
  -6  -8   1    5.81    1.03 
  -6  -8   1    7.14    0.94 
  -6   8   1    5.18    1.15 
  -5  -8   1    0.03    0.36 
  -5  -8   1    0.45    0.37 
   5  -8  -1    0.38    0.47 
  -5  -8   1    0.79    0.33 
  -5   8   1    0.43    0.50 
  -5   8   1    0.64    0.47 
  -4  -8   1   20.79    2.33 
  -4  -8   1   20.23    1.99 
   4  -8  -1   19.57    2.46 
  -4  -8   1   16.15    1.69 
  -4   8   1   18.30    2.40 
  -4   8   1   20.55    2.34 
   3  -8  -1   23.65    2.91 
  -3  -8   1   23.72    2.35 
  -3  -8   1   20.96    2.01 
  -3  -8   1   25.63    2.75 
  -3   8   1   22.47    2.84 
  -2  -8   1   12.36    1.51 
  -2  -8   1   11.94    1.26 
  -2  -8   1   10.68    1.13 
   2  -8  -1   11.86    1.59 
  -2   8   1   13.16    1.68 
  -1  -8   1   41.22    3.54 
   1  -8  -1   47.74    4.72 
   1  -8  -1   41.73    5.10 
  -1  -8   1   46.30    4.16 
  -1  -8   1   42.48    4.85 
   1   8  -1   39.16    4.61 
  -1   8   1   43.37    4.93 
   0  -8   1   92.23    7.13 
   0  -8  -1   87.71    8.37 
   0  -8  -1   90.17    9.79 
   0  -8  -1   92.14    9.36 
   0   8   1   85.88    9.85 
   0   8  -1   80.17    9.31 
  -1  -8  -1   30.92    3.26 
   1  -8   1   28.54    3.52 
  -1  -8  -1   28.69    2.87 
  -1  -8  -1   32.63    2.44 
  -1  -8  -1   28.62    3.37 
   1   8   1   27.36    3.36 
  -1   8  -1   29.00    3.26 
  -2  -8  -1    2.88    0.53 
  -2  -8  -1    2.73    0.53 
   2  -8   1    2.73    0.59 
  -2  -8  -1    2.38    0.41 
  -2   8  -1    2.54    0.61 
  -3  -8  -1   62.10    5.75 
   3  -8   1   55.80    7.00 
  -3  -8  -1   59.78    6.70 
  -3   8  -1   60.66    6.45 
  -4  -8  -1    8.84    1.12 
   4  -8   1   10.82    1.46 
  -4  -8  -1    9.73    1.34 
  -4   8  -1    8.22    1.35 
  -5  -8  -1   27.81    2.64 
   5  -8   1   25.13    3.19 
  -5  -8  -1   25.20    3.06 
  -5   8  -1   24.65    2.99 
   6  -8   1   11.02    1.67 
  -6  -8  -1   10.15    1.53 
   6  -8   1   12.45    1.81 
  -6  -8  -1   10.73    1.33 
  -6   8  -1   12.37    1.68 
   7  -8   1    6.85    1.24 
  -7  -8  -1    4.07    0.90 
   7  -8   1    6.02    1.17 
  -7  -8  -1    4.94    0.83 
   7  -8   1    6.46    1.06 
   8  -8   1    5.05    0.83 
   8  -8   1    2.78    1.04 
  -8  -8  -1    4.65    0.81 
   8  -8   1    4.05    1.10 
   8  -8   1    3.21    1.00 
  -8  -8  -1    4.69    0.74 
   8  -8   1    4.87    0.64 
   9  -8   1    5.55    0.63 
   9  -8   1    3.25    1.11 
   9  -8   1    3.06    1.06 
  -9  -8  -1    3.85    0.76 
  -9   8  -1    3.58    1.37 
  -9   8  -1    3.44    0.82 
  10  -8   1    2.45    0.93 
 -10  -8  -1    3.33    0.74 
 -10  -8  -1    3.54    0.75 
  10  -8   1    3.14    1.07 
 -10   8  -1    3.84    1.27 
 -10   8  -1    4.09    0.75 
 -11  -8  -1    0.17    0.46 
 -11  -8  -1    0.40    0.46 
  11  -8   1    2.19    0.70 
 -11   8  -1    0.38    0.47 
  12  -8   1   -0.38    0.53 
 -12  -8  -1    0.10    0.38 
 -12  -8  -1   -0.98    0.36 
 -12   8  -1   -0.36    0.34 
 -13   8  -1    2.24    0.43 
 -12  -9   1    1.08    0.40 
  12   9  -1    0.63    0.46 
 -11  -9   1    1.58    0.53 
 -11  -9   1    1.80    0.51 
  11  -9  -1    1.57    0.66 
  11  -9  -1    2.73    0.79 
 -11   9   1    2.58    0.57 
  10  -9  -1    0.46    0.72 
 -10  -9   1    2.29    0.61 
 -10  -9   1    1.61    0.45 
  10  -9  -1    0.49    0.62 
 -10  -9   1    2.49    0.59 
 -10   9   1    1.99    0.58 
   9  -9  -1    1.15    0.78 
  -9  -9   1    0.96    0.42 
  -9  -9   1    0.56    0.53 
   9  -9  -1    0.65    0.77 
  -9  -9   1    1.03    0.58 
  -9   9   1    0.06    0.97 
   8  -9  -1    6.81    1.18 
  -8  -9   1    8.01    1.05 
   8  -9  -1    7.60    1.44 
  -8  -9   1    5.04    1.09 
  -8  -9   1    8.71    1.10 
   8  -9  -1    8.25    1.33 
  -8   9   1    7.64    1.63 
   7  -9  -1    1.47    0.64 
   7  -9  -1    2.74    0.82 
  -7  -9   1    0.27    0.40 
   7  -9  -1    1.22    0.65 
   6  -9  -1    0.53    0.52 
   6  -9  -1   -0.15    0.62 
  -6  -9   1   -0.12    0.38 
  -6  -9   1    0.36    0.35 
   6  -9  -1    0.23    0.57 
   5  -9  -1   29.39    3.52 
  -5  -9   1   29.21    2.86 
   5  -9  -1   24.36    3.58 
  -5  -9   1   29.61    3.34 
  -5   9   1   26.23    3.42 
  -5   9   1   30.21    3.33 
   4  -9  -1   46.74    5.10 
  -4  -9   1   43.32    4.82 
  -4  -9   1   44.11    4.14 
  -4  -9   1   37.23    3.51 
  -4   9   1   39.75    4.91 
  -4   9   1   40.24    4.70 
  -3  -9   1   40.12    4.47 
   3  -9  -1   41.27    4.72 
  -3  -9   1   35.71    3.27 
  -3  -9   1   41.78    3.84 
  -3   9   1   35.29    4.35 
  -3   9   1   38.58    4.58 
  -2  -9   1   17.09    1.81 
  -2  -9   1   16.69    1.58 
   2  -9  -1   18.46    2.28 
  -2  -9   1   17.30    2.13 
  -2   9   1   19.88    2.25 
  -1  -9   1    6.03    0.70 
   1  -9  -1    7.03    1.02 
   1  -9  -1    6.65    1.03 
  -1  -9   1    5.37    0.72 
  -1  -9   1    6.68    0.88 
  -1   9   1    4.68    0.96 
   0  -9  -1   88.30    9.27 
   0  -9  -1   86.51    9.68 
   0  -9  -1   90.28   10.15 
   0  -9  -1   83.36    8.27 
   0  -9   1   86.60    7.05 
   0  -9   1   86.95   10.12 
   0   9  -1   83.97    9.23 
   0   9   1   89.86    9.76 
   1  -9   1   13.90    1.86 
  -1  -9  -1   15.14    1.77 
  -1  -9  -1   13.90    1.49 
  -1  -9  -1   14.93    1.81 
  -1   9  -1   15.73    1.88 
   2  -9   1   31.25    3.99 
  -2  -9  -1   33.48    3.82 
  -2  -9  -1   33.52    3.26 
  -2   9  -1   34.74    3.72 
  -3  -9  -1   13.20    1.39 
   3  -9   1   14.99    1.86 
  -3  -9  -1   10.90    1.65 
  -3   9  -1   12.93    1.75 
  -4  -9  -1    6.56    1.13 
   4  -9   1    8.13    1.29 
  -4  -9  -1    8.57    1.02 
  -4   9  -1    8.30    1.27 
  -5  -9  -1    7.79    1.07 
  -5  -9  -1   11.74    1.39 
   5  -9   1    7.22    1.40 
   5  -9   1    9.82    1.43 
  -5   9  -1    9.08    1.42 
  -5   9  -1    7.87    1.42 
  -6  -9  -1    5.92    0.99 
   6  -9   1    5.37    1.06 
  -6  -9  -1    5.89    0.89 
   6  -9   1    4.54    1.13 
   6  -9   1    8.32    1.44 
   7  -9   1    6.39    1.17 
   7  -9   1    7.48    1.34 
   7  -9   1    6.50    1.14 
   7  -9   1    5.11    1.21 
  -7  -9  -1    6.92    0.98 
  -7  -9  -1    6.75    1.10 
   8  -9   1    9.10    1.63 
   8  -9   1    8.94    1.62 
   8  -9   1    8.73    1.48 
  -8  -9  -1    9.41    1.17 
   8  -9   1    9.62    1.40 
  -8  -9  -1    8.78    1.21 
   8  -9   1    8.10    1.22 
   9  -9   1    8.63    1.63 
   9  -9   1   12.10    1.81 
  -9  -9  -1    9.38    1.26 
  -9  -9  -1   10.27    1.33 
  -9   9  -1    8.76    1.33 
  -9   9  -1   10.33    1.99 
  10  -9   1    4.38    1.11 
  10  -9   1    4.55    1.02 
 -10  -9  -1    3.80    0.79 
 -10   9  -1    4.91    0.83 
  11  -9   1    3.36    0.90 
 -11  -9  -1    3.28    0.70 
 -11   9  -1    4.66    0.74 
 -12  -9  -1    3.17    0.59 
 -12   9  -1    3.26    0.57 
  12 -10  -1    0.57    0.36 
 -12 -10   1    1.14    0.39 
  12  10  -1    2.41    0.50 
 -11 -10   1    2.52    0.57 
  11 -10  -1    1.85    0.67 
  11 -10  -1    2.21    0.71 
 -11 -10   1    2.22    0.50 
  10 -10  -1    1.70    0.72 
  10 -10  -1    1.85    0.77 
 -10 -10   1    2.80    0.67 
 -10 -10   1    2.82    0.54 
 -10 -10   1    2.14    0.60 
  -9 -10   1    2.25    0.50 
   9 -10  -1    1.93    0.67 
  -9 -10   1    3.26    0.73 
   9 -10  -1    1.46    0.74 
   9 -10  -1    1.90    0.82 
  -9 -10   1    2.31    0.63 
  -9  10   1    1.78    1.12 
  -8 -10   1    2.34    0.62 
  -8 -10   1    3.26    0.76 
   8 -10  -1    9.35    1.25 
   8 -10  -1    0.83    0.64 
   8 -10  -1    1.85    0.68 
   8 -10  -1    1.95    0.86 
  -8 -10   1    2.41    0.53 
  -8  10   1    0.10    1.15 
   7 -10  -1    6.81    1.22 
  -7 -10   1    7.59    1.03 
  -7 -10   1    7.52    1.08 
   7 -10  -1   10.63    1.52 
   7 -10  -1    7.43    1.35 
   7 -10  -1    6.12    1.27 
   6 -10  -1    5.05    1.10 
  -6 -10   1    5.36    0.82 
   6 -10  -1    3.77    0.98 
   6 -10  -1    4.07    1.08 
  -6 -10   1    4.96    0.92 
   5 -10  -1    1.18    0.60 
  -5 -10   1    1.81    0.45 
   5 -10  -1    2.01    0.73 
  -5 -10   1    1.61    0.54 
   5 -10  -1    1.62    0.68 
  -5  10   1    1.76    0.74 
   4 -10  -1   16.59    2.29 
  -4 -10   1   15.11    1.68 
  -4 -10   1   16.34    2.06 
   4 -10  -1   16.76    2.14 
  -4  10   1   15.69    2.21 
  -4  10   1   14.47    2.17 
  -3 -10   1    1.95    0.49 
  -3 -10   1    1.71    0.39 
  -3 -10   1    1.99    0.51 
   3 -10  -1    2.15    0.65 
  -3  10   1    1.90    0.67 
  -3  10   1    1.83    0.61 
  -2 -10   1   22.67    2.58 
  -2 -10   1   20.38    2.18 
  -2 -10   1   19.69    1.90 
   2 -10  -1   21.85    2.73 
  -2  10   1   24.48    2.70 
  -1 -10   1   13.96    1.41 
  -1 -10   1   14.72    1.85 
   1 -10  -1   17.14    1.99 
  -1 -10   1   13.54    1.54 
  -1  10   1   16.73    1.95 
   0 -10  -1   18.33    2.24 
   0 -10   1   17.88    2.30 
   0 -10   1   19.70    1.65 
   0 -10  -1   19.06    2.22 
   0 -10  -1   21.18    2.35 
   0  10   1   16.97    2.26 
   0  10  -1   16.37    2.16 
   1 -10   1   13.09    1.86 
  -1 -10  -1   13.60    1.81 
  -1 -10  -1   15.15    1.51 
  -1  10  -1   18.27    1.99 
  -2 -10  -1   58.96    6.55 
  -2 -10  -1   56.73    5.60 
   2 -10   1   57.66    6.86 
  -2  10  -1   58.89    6.32 
   3 -10   1   23.30    2.91 
  -3 -10  -1   23.88    2.79 
  -3 -10  -1   21.78    2.35 
  -3  10  -1   25.24    2.94 
  -4 -10  -1    0.39    0.38 
  -4 -10  -1   -0.03    0.28 
   4 -10   1   -0.03    0.40 
  -4  10  -1    0.51    0.54 
   5 -10   1    0.45    0.51 
  -5 -10  -1    0.43    0.38 
   5 -10   1    1.06    0.62 
   5 -10   1    0.50    0.76 
  -5 -10  -1    0.47    0.43 
  -5  10  -1    0.18    0.62 
  -6 -10  -1    9.07    1.26 
   6 -10   1    9.92    1.65 
  -6 -10  -1    9.99    1.48 
   6 -10   1   10.36    1.62 
   6 -10   1   16.19    2.06 
   7 -10   1    0.20    0.76 
  -7 -10  -1    0.36    0.50 
   7 -10   1    0.92    0.55 
  -7 -10  -1    0.93    0.41 
   7 -10   1    0.78    0.65 
   7 -10   1    1.91    0.71 
  -7 -10  -1    1.10    0.50 
   7 -10   1    1.24    0.81 
   8 -10   1    0.76    0.89 
   8 -10   1    2.19    0.59 
   8 -10   1    1.67    0.66 
   8 -10   1    1.35    0.76 
  -8 -10  -1    0.94    0.52 
   8 -10   1    1.05    0.83 
  -8 -10  -1    1.09    0.44 
  -9 -10  -1   12.34    1.52 
  -9 -10  -1   11.48    1.45 
   9 -10   1   15.19    2.03 
   9 -10   1   11.04    1.60 
   9 -10   1   11.04    1.82 
  -9  10  -1   11.26    1.52 
  -9  10  -1   10.88    2.19 
 -10 -10  -1    2.98    0.66 
  10 -10   1    3.69    0.97 
  10 -10   1    1.51    0.77 
 -10 -10  -1    3.08    0.56 
 -10  10  -1    3.52    0.69 
 -11 -10  -1    1.09    0.48 
  11 -10   1    1.39    0.65 
  11 -10   1    1.14    0.70 
 -11  10  -1    1.39    0.48 
 -12 -10  -1    1.40    0.40 
 -12  10  -1    0.69    0.36 
  12  11  -1    1.19    0.41 
  11 -11  -1    0.80    0.51 
  11 -11  -1    2.27    0.63 
 -11 -11   1    0.66    0.28 
 -11 -11   1    0.67    0.43 
  10 -11  -1    0.62    0.55 
  10 -11  -1   -0.13    0.64 
 -10 -11   1    0.18    0.44 
 -10 -11   1    0.38    0.50 
 -10 -11   1    0.36    0.33 
   9 -11  -1    2.99    0.95 
  -9 -11   1    1.84    0.47 
  -9 -11   1    2.32    0.70 
  -9 -11   1    1.57    0.57 
   9 -11  -1    1.59    0.63 
   9 -11  -1    2.18    0.71 
  -8 -11   1    2.38    0.53 
  -8 -11   1    1.84    0.58 
   8 -11  -1    0.97    0.67 
  -8 -11   1    2.85    0.75 
   8 -11  -1    1.58    0.68 
   8 -11  -1    3.62    1.09 
   8 -11  -1    2.72    0.71 
  -8  11   1    0.08    1.19 
  -7 -11   1    4.58    0.75 
   7 -11  -1    3.53    0.88 
  -7 -11   1    3.55    0.75 
  -7 -11   1    5.89    0.98 
   7 -11  -1    4.44    1.07 
   7 -11  -1    5.58    1.14 
   7 -11  -1    3.90    0.98 
   6 -11  -1    1.10    0.60 
  -6 -11   1    1.74    0.56 
   6 -11  -1    1.76    0.77 
   6 -11  -1    0.84    0.68 
  -6 -11   1    1.83    0.51 
  -6 -11   1    1.53    0.47 
   6 -11  -1    1.37    0.65 
   5 -11  -1    0.23    0.58 
   5 -11  -1    0.97    0.58 
   5 -11  -1   -0.09    0.59 
  -5 -11   1    0.39    0.46 
  -5 -11   1    0.27    0.36 
   4 -11  -1    1.52    0.69 
  -4 -11   1    2.14    0.55 
   4 -11  -1    1.63    0.66 
  -4 -11   1    2.51    0.49 
   4 -11  -1    2.30    0.78 
  -4  11   1    1.90    0.81 
  -3 -11   1    2.15    0.47 
   3 -11  -1    2.26    0.72 
  -3 -11   1    3.00    0.62 
   3 -11  -1    3.31    0.71 
  -3  11   1    1.80    0.76 
  -3  11   1    2.59    0.75 
  -2 -11   1   13.45    1.56 
   2 -11  -1   10.16    1.65 
  -2 -11   1    8.36    1.22 
  -2  11   1   15.00    1.77 
  -2  11   1   14.79    1.82 
   1 -11  -1    6.93    1.08 
  -1 -11   1    5.40    0.73 
  -1  11   1    4.35    0.93 
   0 -11  -1   24.17    2.87 
  -1 -11  -1    3.32    0.50 
  -1 -11  -1    2.91    0.64 
   1 -11   1    2.84    0.68 
  -1  11  -1    3.34    0.79 
  -2 -11  -1   11.55    1.63 
   2 -11   1   12.65    1.76 
  -2 -11  -1   10.90    1.34 
  -2  11  -1   14.96    1.80 
  -3 -11  -1    3.34    0.63 
   3 -11   1    4.62    0.91 
  -3 -11  -1    4.58    0.81 
  -3  11  -1    5.48    1.06 
  -4 -11  -1    3.39    0.61 
   4 -11   1    5.22    1.17 
   4 -11   1    2.96    0.84 
   4 -11   1    4.77    0.91 
  -4 -11  -1    3.39    0.77 
  -4  11  -1    3.56    0.93 
   5 -11   1    0.17    0.78 
  -5 -11  -1   -0.11    0.35 
   5 -11   1   -0.02    0.46 
   5 -11   1   -0.01    0.51 
  -5 -11  -1   -0.22    0.41 
  -6 -11  -1    0.09    0.36 
  -6 -11  -1   -0.14    0.43 
   6 -11   1   -0.41    0.56 
   6 -11   1    0.26    0.52 
   6 -11   1    0.19    0.53 
   6 -11   1    0.24    0.60 
   7 -11   1    4.29    0.92 
  -7 -11  -1    3.84    0.65 
   7 -11   1    4.06    0.77 
  -7 -11  -1    3.38    0.84 
  -7 -11  -1    3.23    0.72 
   7 -11   1    4.58    0.89 
   7 -11   1    2.38    0.90 
   7 -11   1    4.25    1.05 
   7 -11   1    2.75    1.05 
  -8 -11  -1    1.47    0.45 
   8 -11   1    2.01    0.78 
   8 -11   1    0.37    0.60 
   8 -11   1    0.26    0.53 
   8 -11   1    1.14    0.84 
  -8 -11  -1    0.98    0.48 
   9 -11   1    9.90    1.75 
  -9 -11  -1   10.18    1.36 
  -9 -11  -1   11.29    1.34 
   9 -11   1    9.03    1.68 
   9 -11   1   10.44    1.52 
  -9  11  -1   12.46    1.45 
 -10 -11  -1    1.69    0.42 
 -10 -11  -1    2.87    0.60 
  10 -11   1    0.97    0.73 
  10 -11   1    1.63    0.70 
  11 -11   1    1.51    0.68 
  11 -11   1    2.17    0.65 
 -11 -11  -1    1.35    0.46 
 -11  11  -1    1.99    0.48 
 -12 -11  -1    0.49    0.30 
 -11 -12   1    2.03    0.47 
 -11 -12   1    2.99    0.43 
  10 -12  -1    2.79    0.70 
 -10 -12   1    2.60    0.49 
  10 -12  -1    3.32    0.87 
  10 -12  -1    4.18    0.73 
   9 -12  -1    4.30    0.94 
  -9 -12   1    3.84    0.75 
  -9 -12   1    5.20    0.88 
   9 -12  -1    3.20    0.82 
   9 -12  -1    4.89    1.05 
  -9 -12   1    4.37    0.65 
  -8 -12   1    0.35    0.37 
   8 -12  -1    1.17    0.88 
  -8 -12   1    0.43    0.46 
   8 -12  -1    0.22    0.52 
   8 -12  -1    0.51    0.60 
   8 -12  -1    1.17    0.55 
  -8  12   1   -0.93    1.16 
   7 -12  -1    7.50    1.12 
  -7 -12   1    6.42    0.89 
   7 -12  -1    6.29    1.25 
  -7 -12   1    4.89    0.88 
   7 -12  -1    5.76    1.22 
   7 -12  -1    5.92    1.20 
  -7  12   1    3.40    1.52 
   6 -12  -1   17.19    2.32 
  -6 -12   1   16.45    1.83 
  -6 -12   1   10.39    1.91 
   6 -12  -1   13.57    2.02 
  -6 -12   1   15.76    1.84 
   6 -12  -1   18.99    2.33 
   6 -12  -1   17.90    2.19 
  -5 -12   1    5.89    0.98 
   5 -12  -1    8.60    1.37 
   5 -12  -1    9.42    1.31 
  -5 -12   1    7.13    1.21 
   5 -12  -1    8.49    1.52 
   5 -12  -1    8.21    1.41 
  -4 -12   1    8.69    1.26 
   4 -12  -1   12.25    1.58 
   4 -12  -1    7.72    1.32 
   4 -12  -1    5.85    1.36 
  -4 -12   1    7.19    1.01 
  -3 -12   1    5.85    0.85 
  -3 -12   1    5.22    0.98 
   3 -12  -1    6.45    1.12 
   3 -12  -1    7.50    1.31 
   3 -12  -1    7.44    1.21 
   2 -12  -1   19.38    2.83 
  -2 -12   1   22.80    2.69 
   2 -12  -1   25.50    2.88 
  -2  12   1   22.35    2.88 
   1 -12  -1    4.21    0.89 
  -1  12   1    4.31    0.92 
  -1  12   1    3.99    0.98 
  -1 -12  -1    4.03    0.73 
   1 -12   1    3.39    0.77 
  -1  12  -1    2.73    0.78 
  -2 -12  -1    4.76    0.87 
  -2 -12  -1    4.06    0.63 
   2 -12   1    5.09    0.94 
  -2  12  -1    4.59    1.05 
   3 -12   1    0.69    0.52 
  -3 -12  -1   -0.19    0.39 
   3 -12   1    0.49    0.52 
  -3 -12  -1    0.82    0.34 
   3 -12   1    0.38    0.76 
   4 -12   1   21.48    2.29 
   4 -12   1   12.16    1.78 
   4 -12   1   10.24    1.72 
  -4 -12  -1   10.47    1.35 
  -4 -12  -1   10.34    1.60 
   5 -12   1   35.88    3.63 
  -5 -12  -1   27.49    3.44 
  -5 -12  -1   27.03    2.94 
   5 -12   1   30.51    3.62 
   5 -12   1   25.13    3.40 
   5 -12   1   29.43    3.71 
   6 -12   1    5.18    1.08 
   6 -12   1    3.27    0.98 
  -6 -12  -1    3.41    0.83 
   6 -12   1    3.28    0.88 
  -6 -12  -1    3.64    0.73 
   6 -12   1    2.50    0.94 
   6 -12   1    5.66    1.01 
  -6 -12  -1    4.44    0.68 
   7 -12   1    7.82    1.19 
   7 -12   1    4.13    1.21 
  -7 -12  -1    5.75    1.08 
  -7 -12  -1    5.93    0.93 
   7 -12   1    6.94    1.29 
  -7 -12  -1    6.73    0.91 
   7 -12   1    6.40    1.28 
   8 -12   1    2.03    0.77 
  -8 -12  -1    2.23    0.59 
   8 -12   1    2.40    0.86 
  -8 -12  -1    4.25    0.62 
   8 -12   1    2.85    0.96 
   9 -12   1    3.78    0.83 
   9 -12   1    2.98    0.85 
  -9 -12  -1    4.09    0.73 
   9 -12   1    7.79    1.22 
  -9 -12  -1    4.35    0.66 
  -9  12  -1    3.93    0.78 
 -10 -12  -1    1.86    0.42 
  10 -12   1    4.18    0.91 
 -10 -12  -1    2.50    0.56 
  10 -12   1    1.25    0.68 
 -10  12  -1    2.43    0.57 
 -11 -12  -1    0.03    0.33 
  11 -12   1    0.41    0.58 
 -11  12  -1    1.20    0.40 
  11 -13  -1    0.21    0.18 
  10 -13  -1    0.52    0.49 
 -10 -13   1    0.07    0.25 
 -10 -13   1   -0.50    0.33 
  10 -13  -1    0.15    0.65 
  10 -13  -1    0.37    0.44 
   9 -13  -1    0.24    0.68 
   9 -13  -1    0.77    0.52 
  -9 -13   1    0.06    0.29 
  -9 -13   1    0.70    0.45 
   9 -13  -1    0.79    0.53 
   8 -13  -1    2.24    0.78 
   8 -13  -1    4.04    0.98 
   8 -13  -1    3.78    0.82 
  -8 -13   1    2.85    0.65 
  -8 -13   1    3.95    0.61 
   7 -13  -1    0.21    0.59 
  -7 -13   1   -0.07    0.44 
   7 -13  -1   -0.90    0.48 
   7 -13  -1    0.72    0.62 
   7 -13  -1    0.42    0.77 
  -7 -13   1    0.29    0.36 
  -6 -13   1    1.32    0.47 
   6 -13  -1    1.74    0.70 
   6 -13  -1    2.27    0.91 
   6 -13  -1    1.06    0.66 
  -6 -13   1    1.51    0.56 
   6 -13  -1    1.17    0.73 
   5 -13  -1   14.58    2.54 
  -5 -13   1   17.21    2.11 
  -5 -13   1   15.33    2.32 
  -5 -13   1   18.24    2.09 
   5 -13  -1   19.14    2.33 
   5 -13  -1   21.19    2.64 
   5 -13  -1   21.09    2.44 
   5 -13  -1   18.94    2.45 
  -4 -13   1   15.76    2.15 
   4 -13  -1   17.88    2.22 
   4 -13  -1   14.52    2.28 
   4 -13  -1   10.83    2.25 
   4 -13  -1   18.39    2.27 
  -4 -13   1   19.67    1.99 
   3 -13  -1    6.34    1.15 
   3 -13  -1    4.16    1.13 
  -3 -13   1    6.32    1.03 
   3 -13  -1    5.97    1.10 
   2 -13  -1   13.43    1.98 
   2 -13  -1   11.52    1.78 
   2 -13  -1   12.99    1.89 
   1 -13  -1    5.37    1.04 
   1 -13   1    6.62    1.14 
   2 -13   1   23.36    2.75 
   2 -13   1   17.46    2.40 
  -2 -13  -1   17.74    2.31 
  -3 -13  -1    6.80    1.14 
  -3 -13  -1    5.51    0.87 
   3 -13   1   11.29    1.62 
   3 -13   1    7.44    1.24 
   4 -13   1    3.51    0.92 
  -4 -13  -1    5.42    0.79 
   4 -13   1    3.05    0.90 
  -4 -13  -1    4.42    0.76 
  -4 -13  -1    6.26    0.97 
   4 -13   1    7.97    1.45 
   4 -13   1    4.94    1.02 
  -5 -13  -1   17.44    1.91 
   5 -13   1   16.35    2.32 
  -5 -13  -1   16.00    2.16 
   5 -13   1   16.63    2.26 
   5 -13   1   13.16    2.29 
   5 -13   1   16.45    2.20 
   5 -13   1   19.98    2.25 
  -5 -13  -1   13.92    1.87 
   6 -13   1   14.38    2.02 
   6 -13   1   12.35    1.85 
   6 -13   1    7.74    1.81 
   6 -13   1   12.74    1.79 
  -6 -13  -1   13.37    1.52 
  -6 -13  -1   13.26    1.56 
  -6 -13  -1   12.61    1.78 
   6 -13   1   11.12    1.83 
  -7 -13  -1    9.18    1.39 
   7 -13   1    9.97    1.55 
   7 -13   1   10.69    1.48 
   7 -13   1    7.35    1.45 
  -7 -13  -1    8.02    1.20 
   7 -13   1    6.75    1.56 
  -7 -13  -1   11.02    1.21 
   8 -13   1    4.96    1.08 
  -8 -13  -1    3.78    0.65 
   8 -13   1    5.57    0.93 
   8 -13   1    2.21    0.74 
  -8 -13  -1    4.97    0.75 
  -9 -13  -1    1.75    0.41 
   9 -13   1    1.91    0.70 
   9 -13   1    1.57    0.85 
  -9 -13  -1    0.70    0.46 
   9 -13   1    1.59    0.59 
  10 -13   1    1.37    0.59 
 -10 -13  -1    1.96    0.49 
  10 -13   1    1.33    0.55 
 -10 -13  -1    2.36    0.40 
  10 -13   1    2.84    0.79 
 -11 -13  -1    0.17    0.27 
  11 -13   1    0.06    0.47 
 -10 -14   1    1.46    0.40 
 -10 -14   1    1.34    0.31 
  10 -14  -1    2.26    0.65 
  10 -14  -1    1.41    0.48 
  -9 -14   1    0.67    0.30 
   9 -14  -1    0.96    0.62 
  -9 -14   1    0.60    0.42 
   9 -14  -1   -0.43    0.46 
   9 -14  -1    0.25    0.46 
   8 -14  -1    1.59    0.59 
   8 -14  -1    3.79    0.90 
  -8 -14   1    4.53    0.67 
   8 -14  -1    4.82    0.83 
  -8 -14   1    3.79    0.56 
   7 -14  -1    3.76    0.98 
   7 -14  -1    3.33    0.79 
  -7 -14   1    4.72    0.72 
   7 -14  -1    2.33    0.77 
  -7 -14   1    3.64    0.62 
   6 -14  -1    3.35    0.85 
   6 -14  -1    2.00    0.76 
   6 -14  -1    3.37    0.96 
  -6 -14   1    2.19    0.61 
  -6 -14   1    3.10    0.58 
   6 -14  -1    3.01    0.79 
   5 -14  -1    0.80    0.63 
  -5 -14   1    1.09    0.51 
   5 -14  -1    0.52    0.55 
   5 -14  -1    1.03    0.64 
  -5 -14   1    0.80    0.43 
   5 -14  -1    1.14    0.91 
  -5 -14   1    0.58    0.47 
   4 -14  -1   -0.49    0.52 
   4 -14  -1    0.67    0.55 
  -4 -14   1    0.50    0.47 
  -4 -14   1   -0.19    0.41 
   4 -14  -1    0.12    0.52 
   4 -14  -1    0.35    0.81 
   4 -14  -1    0.45    0.56 
   3 -14  -1    7.31    1.28 
   3 -14  -1    8.33    1.22 
   3 -14  -1    5.40    1.29 
  -3 -14   1    7.10    0.98 
   3 -14  -1    5.12    1.10 
   2 -14  -1   20.05    2.51 
   2 -14  -1   21.15    2.76 
   2 -14  -1   16.67    2.47 
   2 -14  -1   19.67    2.40 
   2 -14   1    9.21    1.54 
   2 -14   1    5.42    1.10 
   2 -14   1    8.13    1.24 
  -2 -14  -1    4.89    1.00 
   3 -14   1    9.34    1.55 
   3 -14   1   10.31    1.62 
   3 -14   1    9.08    1.58 
  -3 -14  -1   10.57    1.53 
   3 -14   1    9.63    1.79 
  -3 -14  -1   11.17    1.34 
   4 -14   1    1.86    0.76 
   4 -14   1    2.84    0.79 
  -4 -14  -1    3.25    0.65 
   4 -14   1    3.98    0.86 
   4 -14   1    2.35    0.84 
  -4 -14  -1    3.26    0.78 
  -5 -14  -1    0.95    0.49 
  -5 -14  -1    1.80    0.45 
  -5 -14  -1    0.93    0.55 
   5 -14   1    0.18    0.52 
   5 -14   1    0.38    0.67 
   5 -14   1    0.26    0.71 
   5 -14   1    1.21    0.70 
   5 -14   1    0.85    0.60 
  -6 -14  -1   10.07    1.12 
  -6 -14  -1    9.45    1.14 
   6 -14   1    9.32    1.47 
  -6 -14  -1    9.25    1.34 
   6 -14   1    5.19    1.23 
   6 -14   1    7.47    1.56 
   6 -14   1    7.27    1.30 
  -7 -14  -1    1.74    0.47 
   7 -14   1    2.29    0.72 
   7 -14   1    1.85    0.93 
   7 -14   1    1.28    0.71 
  -7 -14  -1    1.47    0.51 
   8 -14   1    1.68    0.82 
  -8 -14  -1    1.58    0.42 
   8 -14   1    1.91    0.65 
  -8 -14  -1    1.30    0.50 
   8 -14   1    2.25    0.73 
  -9 -14  -1    1.31    0.36 
   9 -14   1    1.37    0.75 
   9 -14   1    0.77    0.58 
  -9 -14  -1    1.83    0.48 
   9 -14   1    1.33    0.54 
 -10 -14  -1    0.28    0.34 
  10 -14   1    1.44    0.62 
  10 -14   1    0.44    0.41 
 -10 -14  -1    0.16    0.24 
 -10 -15   1    0.38    0.21 
 -10 -15   1    0.44    0.27 
  10 -15  -1    1.18    0.50 
   9 -15  -1   -0.19    0.49 
  -9 -15   1    0.94    0.38 
  -9 -15   1    0.44    0.26 
   9 -15  -1    0.66    0.44 
   9 -15  -1    0.56    0.46 
   8 -15  -1    1.65    0.64 
  -8 -15   1    2.57    0.45 
   8 -15  -1    3.10    0.69 
  -8 -15   1    2.51    0.53 
   8 -15  -1    2.72    0.82 
  -7 -15   1    2.01    0.56 
   7 -15  -1    2.04    0.71 
  -7 -15   1    1.87    0.46 
   7 -15  -1    3.17    0.82 
   7 -15  -1    3.29    0.71 
  -6 -15   1    5.24    0.70 
   6 -15  -1    3.19    0.84 
   6 -15  -1    2.94    0.87 
   6 -15  -1    2.82    0.88 
   6 -15  -1    4.06    0.84 
  -6 -15   1    4.16    0.70 
   5 -15  -1    2.33    0.71 
   5 -15  -1    2.89    0.85 
   5 -15  -1    2.47    0.79 
   5 -15  -1    3.38    1.00 
  -5 -15   1    2.62    0.56 
   4 -15  -1    4.06    1.12 
  -4 -15   1    5.86    0.81 
   4 -15  -1    4.29    0.90 
   4 -15  -1    5.51    1.09 
   4 -15  -1    3.71    0.90 
   3 -15  -1    1.94    0.73 
   3 -15  -1    2.11    0.71 
   3 -15  -1    2.57    0.74 
   2 -15  -1    0.67    0.56 
   2 -15   1    2.09    0.73 
   2 -15   1    0.62    0.56 
   2 -15   1    1.41    0.70 
   3 -15   1    2.41    0.74 
  -3 -15  -1    2.46    0.55 
   3 -15   1    1.66    0.72 
  -3 -15  -1    2.75    0.72 
   3 -15   1    1.82    0.76 
   3 -15   1    3.23    0.91 
   4 -15   1    2.18    0.90 
   4 -15   1    5.01    1.06 
  -4 -15  -1    4.10    0.75 
  -4 -15  -1    5.07    0.74 
  -4 -15  -1    3.11    0.82 
   4 -15   1    5.94    1.00 
   4 -15   1    3.82    0.94 
  -5 -15  -1    2.94    0.73 
   5 -15   1    2.39    0.91 
  -5 -15  -1    3.94    0.67 
   5 -15   1    4.65    0.98 
  -5 -15  -1    3.05    0.58 
   5 -15   1    1.95    0.86 
   5 -15   1    3.33    0.82 
   6 -15   1    1.07    0.72 
  -6 -15  -1    0.63    0.38 
   6 -15   1    0.06    0.62 
   6 -15   1    0.60    0.55 
  -6 -15  -1    1.01    0.45 
   6 -15   1    1.15    0.83 
  -7 -15  -1    2.19    0.45 
  -7 -15  -1    1.36    0.48 
   7 -15   1    2.99    0.92 
   7 -15   1    1.19    0.69 
   7 -15   1    2.22    0.66 
  -8 -15  -1    5.10    0.69 
  -8 -15  -1    5.14    0.77 
   8 -15   1    2.98    0.90 
   8 -15   1    6.91    1.11 
   8 -15   1    5.33    0.93 
   9 -15   1    1.01    0.48 
  -9 -15  -1    1.08    0.30 
   9 -15   1    1.73    0.63 
  -9 -15  -1    1.10    0.41 
 -10 -15  -1    0.21    0.21 
  10 -15   1    1.20    0.52 
 -10 -15  -1    0.35    0.29 
   9 -16  -1    0.95    0.58 
   9 -16  -1    0.86    0.42 
  -9 -16   1    0.78    0.31 
  -9 -16   1    0.87    0.25 
   8 -16  -1    0.11    0.45 
  -8 -16   1    0.08    0.26 
   8 -16  -1    0.49    0.58 
   8 -16  -1   -0.01    0.40 
  -8 -16   1    0.32    0.38 
   7 -16  -1    2.74    0.66 
  -7 -16   1    3.05    0.55 
  -7 -16   1    2.05    0.43 
   7 -16  -1    1.91    0.66 
   7 -16  -1    2.67    0.72 
   6 -16  -1    2.88    0.78 
  -6 -16   1    2.75    0.52 
   6 -16  -1    3.11    0.72 
   6 -16  -1    2.14    0.71 
   5 -16  -1    2.58    0.81 
   5 -16  -1    5.40    0.90 
  -5 -16   1    3.68    0.62 
   5 -16  -1    4.73    0.99 
   5 -16  -1    2.14    0.78 
   4 -16  -1    5.03    1.14 
   4 -16  -1    5.52    1.23 
  -4 -16   1    7.38    0.92 
   4 -16  -1    6.87    1.16 
   3 -16  -1    4.66    0.89 
   3 -16  -1    2.44    0.79 
   3 -16  -1    5.75    1.05 
   2 -16   1    1.71    0.81 
   3 -16   1    2.21    0.72 
   3 -16   1    1.88    0.83 
   3 -16   1    2.73    0.87 
   4 -16   1    3.81    0.97 
  -4 -16  -1    2.82    0.62 
  -4 -16  -1    3.27    0.60 
   4 -16   1    2.46    0.91 
   4 -16   1    4.20    0.85 
  -4 -16  -1    1.98    0.69 
   5 -16   1    0.35    0.77 
  -5 -16  -1    0.54    0.38 
  -5 -16  -1    0.02    0.39 
   5 -16   1    0.37    0.54 
   5 -16   1    0.47    0.61 
   6 -16   1    1.97    0.63 
  -6 -16  -1    1.76    0.44 
  -6 -16  -1    1.80    0.50 
   6 -16   1    2.25    0.88 
   6 -16   1    1.57    0.71 
  -7 -16  -1    2.83    0.52 
   7 -16   1    3.46    0.74 
  -7 -16  -1    3.77    0.62 
   7 -16   1    3.61    0.83 
  -8 -16  -1    8.90    1.13 
   8 -16   1    9.40    1.34 
   8 -16   1   10.08    1.43 
  -8 -16  -1   10.60    1.18 
  -9 -16  -1    1.07    0.28 
   9 -16   1    1.45    0.47 
   9 -16   1    1.02    0.50 
  -9 -16  -1    1.44    0.37 
  -8 -17   1    0.54    0.32 
   8 -17  -1    0.68    0.40 
   8 -17  -1    0.73    0.53 
  -8 -17   1    0.80    0.24 
  -7 -17   1    3.44    0.52 
   7 -17  -1    2.78    0.66 
   7 -17  -1    4.29    0.75 
   6 -17  -1    8.07    1.23 
  -6 -17   1    8.63    1.04 
   6 -17  -1    8.49    1.28 
   5 -17  -1    0.49    0.57 
   5 -17  -1    2.29    0.79 
  -5 -17   1    0.04    0.32 
   5 -17  -1   -0.26    0.47 
   4 -17  -1    8.73    1.26 
  -4 -17   1    7.84    1.02 
   3 -17  -1    1.61    0.64 
   3 -17   1    2.06    0.77 
   3 -17   1    1.59    0.66 
  -4 -17  -1    6.19    0.85 
   4 -17   1    4.55    1.13 
   4 -17   1    8.13    1.16 
  -5 -17  -1    8.63    1.03 
  -5 -17  -1    8.78    1.08 
   5 -17   1    5.41    1.28 
   5 -17   1    8.52    1.26 
  -6 -17  -1    2.40    0.50 
   6 -17   1    1.98    0.59 
   6 -17   1    2.33    0.83 
  -6 -17  -1    1.57    0.41 
   7 -17   1    1.73    0.65 
  -7 -17  -1    2.31    0.48 
  -7 -17  -1    2.03    0.40 
   7 -17   1    2.27    0.60 
   8 -17   1    1.12    0.60 
  -8 -17  -1    0.89    0.27 
   8 -17   1    0.81    0.43 
  -8 -17  -1    1.50    0.38 
  -7 -18   1    1.30    0.29 
   7 -18  -1    1.41    0.56 
   7 -18  -1    1.38    0.45 
   6 -18  -1   -0.42    0.52 
  -6 -18   1    0.13    0.27 
   6 -18  -1    1.14    0.46 
   5 -18  -1    1.90    0.63 
  -5 -18   1    2.63    0.43 
   5 -18  -1    1.65    0.55 
   5 -18  -1    1.60    0.59 
   4 -18  -1    0.78    0.54 
   3 -18   1    0.40    0.55 
   4 -18   1    5.10    1.10 
  -4 -18  -1    5.75    0.77 
   4 -18   1    6.42    1.02 
   5 -18   1    1.15    0.52 
   5 -18   1    1.69    0.73 
  -5 -18  -1    1.01    0.36 
   6 -18   1    1.04    0.48 
  -6 -18  -1    0.99    0.32 
   6 -18   1    2.15    0.70 
  -6 -18  -1    1.37    0.38 
   7 -18   1    0.14    0.55 
   7 -18   1    0.34    0.39 
  -7 -18  -1    0.98    0.34 
  -7 -18  -1    0.96    0.26 
   8 -18   1    0.50    0.45 
   6 -19  -1    4.47    0.75 
   6 -19  -1    5.15    0.76 
  -6 -19   1    4.93    0.61 
   5 -19  -1   -0.80    0.37 
   4 -19  -1    1.28    0.50 
   4 -19   1    1.08    0.54 
   5 -19   1    0.65    0.43 
  -5 -19  -1    0.43    0.26 
   5 -19   1    0.14    0.58 
  -6 -19  -1    0.95    0.26 
   6 -19   1    0.48    0.40 
   6 -19   1    0.73    0.54 
 -14   0   2    1.57    0.26 
  14   0  -2    1.95    0.35 
 -14   0   2    0.83    0.33 
  13   0  -2   -0.22    0.37 
 -13   0   2   -0.46    0.32 
 -13   0   2   -0.02    0.25 
 -12   0   2    0.54    0.41 
 -12   0   2    0.40    0.33 
  11   0  -2    4.79    0.98 
 -11   0   2    4.39    1.25 
  11   0  -2    4.69    0.75 
 -11   0   2    5.97    0.87 
 -10   0   2    5.23    1.30 
 -10   0   2    5.05    0.88 
  10   0  -2    4.21    0.95 
  -9   0   2   -0.06    0.83 
   9   0  -2    0.07    0.39 
   8   0  -2    0.93    0.42 
  -8   0   2    0.41    0.71 
   7   0  -2   14.26    1.67 
  -7   0   2   16.49    2.41 
  -6   0   2   17.35    2.63 
  -5   0   2    0.85    0.54 
  -5   0   2    0.66    0.27 
  -4   0   2   42.14    4.58 
  -4   0   2   41.37    3.91 
  -4   0   2   38.90    4.33 
  -3   0   2   60.25    6.11 
  -3   0   2   68.87    7.16 
  -1   0   2  195.14   21.13 
   1   0  -2  187.30   19.97 
   0   0   2    3.32    0.32 
   0   0  -2    2.61    0.43 
  -1   0  -2   39.52    4.10 
  -1   0  -2   38.74    2.72 
   1   0   2   38.21    2.72 
  -2   0  -2  434.91   29.89 
  -2   0  -2  401.91   40.62 
  -2   0  -2  453.49   44.89 
  -3   0  -2   33.58    3.48 
  -3   0  -2   32.75    2.31 
  -3   0  -2   31.42    3.15 
  -4   0  -2  112.21   11.15 
  -4   0  -2  104.30   10.07 
  -4   0  -2  101.85    7.42 
  -5   0  -2    6.52    0.76 
  -5   0  -2    7.07    0.87 
  -5   0  -2    6.37    1.11 
  -6   0  -2   40.86    3.97 
  -6   0  -2   45.03    5.87 
  -6   0  -2   38.36    4.39 
  -7   0  -2    1.82    0.76 
   7   0   2    1.45    0.50 
   8   0   2   42.48    5.09 
   8   0   2   38.69    4.02 
  -8   0  -2   38.89    5.84 
  -9   0  -2    7.13    1.59 
   9   0   2    8.08    1.13 
   9   0   2   10.20    1.62 
 -10   0  -2   14.65    1.92 
  10   0   2   16.54    1.86 
  10   0   2   17.34    2.47 
 -10   0  -2   16.35    2.60 
 -11   0  -2   15.57    1.87 
  11   0   2   15.39    1.76 
 -12   0  -2   11.35    1.57 
  12   0   2   14.45    1.45 
 -12   0  -2   13.04    1.36 
  13   0   2    1.54    0.51 
 -13   0  -2    0.39    0.26 
 -13   0  -2   -0.02    0.35 
 -14   0  -2    0.04    0.18 
  14   0   2    0.03    0.27 
 -14   0  -2   -0.17    0.25 
 -14  -1   2    3.22    0.40 
  14  -1  -2    3.72    0.48 
 -14  -1   2    3.36    0.51 
 -14   1   2    3.94    0.44 
 -14   1   2    3.13    0.52 
  13  -1  -2    1.19    0.43 
 -13  -1   2    1.61    0.34 
 -13  -1   2    2.02    0.47 
 -13   1   2    2.14    0.37 
 -13   1   2    1.79    0.46 
  12  -1  -2    1.19    0.56 
 -12  -1   2    1.11    0.36 
 -12  -1   2    1.47    0.50 
 -12   1   2    1.82    0.51 
  12   1  -2    0.61    0.64 
 -11  -1   2    0.50    0.36 
 -11  -1   2    1.84    0.86 
 -11  -1   2    0.52    0.46 
 -11   1   2   -0.05    0.46 
 -11   1   2    0.71    0.83 
  11   1  -2   -0.37    0.40 
  11   1  -2   -0.21    0.64 
  10  -1  -2    0.20    0.39 
 -10  -1   2    0.75    0.88 
 -10  -1   2   -0.08    0.50 
 -10   1   2    0.27    0.83 
 -10   1   2    0.94    0.54 
  10   1  -2    0.58    0.45 
  10   1  -2    0.06    0.65 
   9  -1  -2   10.65    1.21 
  -9  -1   2    9.89    1.89 
  -9   1   2    9.50    1.84 
   9   1  -2    9.50    1.23 
   8  -1  -2    1.31    0.41 
  -8  -1   2    1.21    0.84 
   8   1  -2    1.15    0.50 
  -8   1   2    5.66    0.93 
   7  -1  -2    8.84    1.02 
   7  -1  -2    7.63    1.19 
  -7  -1   2    9.04    1.47 
  -7   1   2    8.00    1.46 
  -6  -1   2   90.25   12.98 
  -6   1   2   98.23   12.98 
  -5  -1   2   41.48    6.44 
  -5  -1   2   47.67    4.43 
  -5   1   2   46.43    4.93 
  -5   1   2   48.12    5.19 
  -5   1   2   45.57    6.48 
  -4  -1   2   19.53    2.01 
  -4  -1   2   19.60    1.75 
  -4   1   2   16.46    2.04 
  -4   1   2   14.00    1.94 
   3  -1  -2  125.11   12.82 
  -3  -1   2  120.30   11.56 
  -3  -1   2  111.46   12.76 
  -3   1   2  133.30   13.54 
  -2  -1   2   52.95    5.47 
   2  -1  -2   47.26    5.21 
  -2  -1   2   48.28    4.68 
  -2   1   2   48.55    5.48 
   2   1  -2   47.90    5.16 
   1  -1  -2   61.18    6.74 
   1   1  -2   66.05    6.71 
   0  -1   2   43.54    3.27 
   0  -1  -2   44.78    4.95 
   0  -1   2   45.59    3.78 
   0   1  -2   52.46    4.94 
   0   1   2   49.45    5.23 
   1  -1   2   50.22    4.43 
  -1  -1  -2   55.17    5.81 
  -1   1  -2   56.37    3.85 
   1   1   2   58.34    3.86 
  -1   1  -2   55.68    5.80 
  -2  -1  -2  264.79   19.30 
  -2  -1  -2  278.62   26.23 
  -2  -1  -2  297.93   29.00 
   2   1   2  275.14   19.31 
  -2   1  -2  274.91   28.99 
  -2   1  -2  274.15   19.30 
  -3  -1  -2   31.29    3.06 
  -3  -1  -2   35.46    3.39 
  -3  -1  -2   32.67    2.25 
  -3   1  -2   30.48    2.25 
  -3   1  -2   29.59    3.07 
  -3   1  -2   30.51    3.39 
  -4  -1  -2   37.49    3.91 
  -4  -1  -2   33.83    3.53 
  -4  -1  -2   31.45    2.60 
  -4   1  -2   36.24    2.61 
  -4   1  -2   40.88    3.54 
  -4   1  -2   40.52    3.93 
  -5  -1  -2   56.22    6.12 
  -5  -1  -2   52.63    8.00 
  -5  -1  -2   56.49    5.54 
  -5   1  -2   61.44    6.14 
  -5   1  -2   61.11    5.53 
   7  -1   2   35.74    3.64 
  -7  -1  -2   33.49    5.27 
  -7  -1  -2   38.72    3.57 
  -7   1  -2   35.47    5.25 
  -8  -1  -2   21.09    3.06 
   8  -1   2   18.66    2.12 
   8  -1   2   22.90    2.88 
  -8   1  -2   21.43    3.08 
   8   1   2   19.05    2.80 
   8   1   2   17.13    2.15 
   9  -1   2    3.33    1.12 
   9  -1   2    2.70    0.66 
  -9  -1  -2    4.59    1.10 
   9   1   2    3.77    0.75 
   9   1   2    5.50    1.11 
  -9   1  -2    2.61    1.07 
  10  -1   2   15.16    1.71 
  10  -1   2   12.86    2.25 
 -10  -1  -2   16.96    1.87 
 -10   1  -2   14.33    1.80 
 -10   1  -2   11.91    2.43 
  10   1   2   17.06    1.79 
  11  -1   2    5.52    0.80 
 -11  -1  -2    5.53    0.92 
 -11  -1  -2    5.26    0.76 
  11  -1   2    4.20    1.24 
 -11   1  -2    6.25    0.94 
  11   1   2    6.01    0.91 
  12  -1   2    5.10    0.88 
 -12  -1  -2    4.19    0.60 
 -12  -1  -2    4.17    0.74 
  12   1   2    3.67    0.67 
 -12   1  -2    3.95    0.74 
 -13  -1  -2    0.92    0.27 
 -13  -1  -2    0.43    0.38 
  13  -1   2    1.07    0.45 
 -13   1  -2    0.60    0.29 
 -13   1  -2    0.06    0.37 
 -14  -1  -2    0.62    0.17 
  14  -1   2    0.16    0.27 
 -14  -1  -2    0.38    0.27 
 -14   1  -2    0.44    0.28 
 -14   1  -2    0.60    0.21 
 -14  -2   2    1.68    0.36 
  14  -2  -2    2.01    0.31 
 -14   2   2    1.23    0.34 
 -13  -2   2    1.76    0.31 
 -13  -2   2    0.92    0.41 
  13  -2  -2    1.96    0.44 
 -13   2   2    1.19    0.42 
 -12  -2   2    1.21    0.34 
  12  -2  -2    1.20    0.52 
 -12  -2   2    1.26    0.48 
  12   2  -2    1.88    0.48 
 -12   2   2    0.66    0.44 
  12   2  -2    2.13    0.67 
 -11  -2   2   14.57    1.53 
 -11  -2   2   14.85    1.83 
  11  -2  -2   13.15    1.72 
 -11  -2   2   14.92    2.46 
  11   2  -2   16.81    1.72 
 -11   2   2   16.58    2.47 
  11   2  -2   12.94    1.86 
 -11   2   2   15.54    1.84 
 -10  -2   2    0.22    0.83 
 -10  -2   2    0.84    0.39 
 -10  -2   2    0.06    0.46 
 -10   2   2    1.48    0.57 
  10   2  -2    1.68    0.53 
  10   2  -2    1.94    0.72 
 -10   2   2    1.24    0.87 
   9  -2  -2   18.89    1.98 
  -9  -2   2   22.28    3.03 
  -9   2   2   15.91    2.90 
   9   2  -2   18.61    2.05 
   8  -2  -2    8.47    1.04 
  -8  -2   2    7.99    1.66 
  -8   2   2   11.07    1.76 
   7  -2  -2    4.07    0.61 
  -7  -2   2    4.43    1.04 
  -7   2   2    5.25    1.09 
   6  -2  -2   15.59    1.96 
  -6  -2   2   17.14    2.47 
  -6  -2   2   14.23    1.63 
  -6   2   2   17.85    2.48 
   5  -2  -2   19.82    2.52 
  -5  -2   2   21.41    2.14 
  -5  -2   2   23.82    3.32 
  -5   2   2   22.34    2.42 
  -5   2   2   27.53    3.37 
  -5   2   2   19.58    2.51 
  -4  -2   2   19.32    1.47 
  -4  -2   2   19.36    1.99 
  -4   2   2   22.42    2.37 
  -3  -2   2   58.33    5.48 
   3  -2  -2   59.43    6.12 
  -3   2   2   54.88    6.43 
   2  -2  -2   47.41    5.18 
  -2  -2   2   50.71    3.41 
  -2  -2   2   47.90    4.65 
  -2   2   2   47.84    5.45 
  -1  -2   2   64.94    4.50 
   1  -2  -2   58.34    6.81 
   1   2  -2   69.02    6.76 
   0  -2   2   71.31    5.59 
   0  -2  -2   70.95    6.60 
   0  -2  -2   70.27    7.32 
   0   2  -2   67.07    7.29 
   0   2   2   67.91    7.72 
  -1  -2  -2  115.96   10.63 
   1  -2   2   97.11    8.12 
  -1  -2  -2   92.37    9.59 
   1   2   2  101.15    7.07 
   1   2   2  109.44   11.21 
  -1   2  -2   92.21   10.61 
  -2  -2  -2   50.19    5.65 
  -2  -2  -2   59.57    6.27 
  -2  -2  -2   63.63    4.17 
  -2   2  -2   62.06    6.28 
   2   2   2   62.75    4.17 
  -3  -2  -2  160.47   15.14 
  -3  -2  -2  151.73   11.14 
  -3  -2  -2  160.51   16.73 
  -3   2  -2  166.75   16.75 
  -4  -2  -2   20.28    2.10 
  -4  -2  -2   18.64    1.90 
  -4   2  -2   19.02    2.12 
  -4   2  -2   18.17    1.89 
  -5  -2  -2    5.21    0.71 
  -5  -2  -2    3.55    0.56 
  -5  -2  -2    3.85    0.62 
  -5   2  -2    5.11    0.56 
  -5   2  -2    4.07    0.67 
  -6  -2  -2   50.03    6.97 
  -6  -2  -2   52.15    4.77 
  -6   2  -2   45.51    5.27 
  -7  -2  -2   15.92    2.54 
  -7  -2  -2   17.83    1.78 
   7  -2   2   19.20    1.83 
  -7   2  -2   14.49    1.94 
   8  -2   2   25.40    3.53 
   8  -2   2   26.26    2.72 
   8   2   2   26.21    3.56 
  -8   2  -2   26.69    4.14 
   9  -2   2   22.22    2.22 
   9  -2   2   22.63    2.98 
  -9   2  -2   20.52    3.20 
   9   2   2   17.09    2.24 
  10  -2   2    4.57    0.73 
 -10  -2  -2    4.21    0.84 
 -10  -2  -2    3.28    0.66 
  10  -2   2    5.28    1.22 
  10   2   2    4.85    0.86 
 -10   2  -2    6.92    0.92 
 -10   2  -2    5.35    1.39 
 -11  -2  -2   22.03    2.39 
 -11  -2  -2   19.92    2.05 
  11  -2   2   19.17    2.28 
  11  -2   2   22.17    3.03 
 -11   2  -2   22.34    2.39 
 -11   2  -2   17.71    3.17 
  11   2   2   21.48    2.28 
 -12  -2  -2   -0.06    0.29 
 -12  -2  -2    0.48    0.43 
  12  -2   2    0.11    0.50 
  12   2   2    0.40    0.45 
 -12   2  -2    0.08    0.46 
 -13  -2  -2   -0.25    0.33 
  13  -2   2    0.54    0.39 
 -13  -2  -2    0.89    0.24 
 -13   2  -2   -0.12    0.36 
  14  -2   2    2.17    0.33 
 -14  -2  -2    1.66    0.35 
 -14   2  -2    1.29    0.34 
 -14  -3   2    1.37    0.34 
  13  -3  -2   -0.21    0.28 
 -13  -3   2    0.10    0.33 
 -13  -3   2   -0.06    0.20 
 -13   3   2   -0.23    0.32 
  13   3  -2    0.01    0.49 
  12  -3  -2    1.94    0.52 
 -12  -3   2    1.39    0.49 
 -12  -3   2    2.36    0.37 
  12   3  -2    1.72    0.64 
 -12   3   2    1.56    0.52 
  12   3  -2    1.79    0.50 
 -11  -3   2    8.84    0.99 
 -11  -3   2    8.96    1.19 
  11  -3  -2    8.65    1.16 
 -11   3   2   11.27    1.28 
  11   3  -2    8.47    1.28 
  11   3  -2    6.38    1.08 
 -11   3   2    8.36    1.66 
 -10  -3   2    3.67    1.06 
 -10  -3   2    0.85    0.59 
 -10  -3   2    2.19    0.60 
  10  -3  -2    2.25    0.66 
 -10  -3   2    1.64    0.43 
  10   3  -2    1.08    0.59 
 -10   3   2    2.78    0.96 
 -10   3   2    2.61    0.62 
  10   3  -2    1.89    0.74 
  -9  -3   2    1.37    0.84 
  -9   3   2    0.77    0.88 
   8  -3  -2   12.73    1.38 
  -8  -3   2   12.03    2.12 
  -8   3   2   12.51    2.06 
   7  -3  -2   25.45    2.49 
  -7  -3   2   25.24    3.86 
  -7   3   2   23.35    3.64 
  -6  -3   2    0.85    0.72 
  -6  -3   2    1.48    0.35 
  -6   3   2    1.59    0.48 
  -6   3   2    2.42    0.49 
  -6   3   2    1.87    0.80 
  -4  -3   2   38.44    5.66 
  -4  -3   2   41.57    3.88 
  -4  -3   2   43.09    2.86 
  -4   3   2   36.93    4.55 
  -3  -3   2   66.45    4.64 
   3  -3  -2   68.61    7.05 
  -3  -3   2   65.63    6.32 
  -3   3   2   64.60    7.41 
  -2  -3   2  110.16   10.87 
  -2  -3   2  113.94    7.99 
   2  -3  -2  115.09   12.07 
  -2   3   2  119.80   12.73 
   1  -3  -2  455.23   45.15 
  -1   3   2  412.79   47.72 
   1   3  -2  428.72   45.07 
   0  -3  -2  441.67   45.97 
   0  -3  -2  420.89   41.56 
   0  -3   2  408.07   35.12 
   0   3  -2  457.00   45.94 
   0   3   2  473.46   48.60 
  -1  -3  -2   87.69    8.35 
  -1  -3  -2  103.04    9.26 
  -1  -3  -2   82.04    7.02 
   1  -3   2   87.62    7.07 
  -1   3  -2   86.23    9.24 
   1   3   2   85.59    6.15 
   1   3   2   86.19    9.74 
  -2  -3  -2   20.45    2.24 
  -2  -3  -2   25.21    2.50 
  -2   3  -2   24.03    2.52 
  -4  -3  -2    3.31    0.55 
  -4  -3  -2    4.37    0.54 
  -4   3  -2    5.04    0.67 
  -4   3  -2    3.79    0.52 
   5  -3   2   62.00    7.07 
  -5  -3  -2   49.99    6.39 
  -5  -3  -2   59.47    5.81 
  -5  -3  -2   58.94    6.76 
  -5   3  -2   65.77    6.46 
  -5   3  -2   66.98    5.78 
  -6  -3  -2   36.81    4.13 
  -6  -3  -2   36.71    3.56 
  -6   3  -2   34.71    3.95 
  -7  -3  -2    9.52    1.02 
   7  -3   2    8.76    0.96 
  -7   3  -2    5.45    1.04 
   8  -3   2    6.66    1.30 
   8  -3   2    4.61    0.71 
  -8  -3  -2    4.62    0.74 
  -8   3  -2    5.84    1.29 
   9  -3   2    3.54    0.60 
   9  -3   2    3.67    1.09 
  -9  -3  -2    3.33    0.57 
  -9   3  -2    2.89    1.14 
  10  -3   2   27.74    2.95 
 -10  -3  -2   29.23    3.30 
  10  -3   2   33.65    4.05 
  10  -3   2   26.06    2.99 
 -10  -3  -2   31.18    2.86 
  10   3   2   31.45    3.15 
 -10   3  -2   31.97    3.30 
 -10   3  -2   27.39    4.57 
  11  -3   2    2.13    0.71 
 -11  -3  -2    3.70    0.54 
  11  -3   2    2.07    1.04 
 -11  -3  -2    2.76    0.66 
  11   3   2    3.58    0.72 
 -11   3  -2    2.89    1.19 
 -11   3  -2    3.07    0.71 
 -12  -3  -2    0.56    0.28 
 -12  -3  -2   -0.03    0.39 
  12  -3   2    0.03    0.82 
  12  -3   2    0.39    0.49 
 -12   3  -2    0.61    0.46 
  12   3   2    0.46    0.48 
 -13  -3  -2    1.11    0.40 
 -13  -3  -2    1.12    0.25 
  13  -3   2    0.72    0.40 
 -13   3  -2    1.06    0.43 
 -14   3  -2    2.08    0.38 
 -14  -4   2    3.18    0.49 
  13  -4  -2    0.69    0.28 
 -13  -4   2   -0.06    0.32 
  13   4  -2    0.52    0.47 
 -13   4   2    0.39    0.34 
 -12  -4   2    2.22    0.53 
  12  -4  -2    2.76    0.53 
 -12  -4   2    2.03    0.35 
  12   4  -2    2.36    0.66 
  12   4  -2    1.09    0.50 
 -12   4   2    1.94    0.54 
 -11  -4   2    2.71    0.61 
  11  -4  -2    3.81    0.65 
 -11  -4   2    1.85    0.41 
  11   4  -2    2.34    0.60 
 -11   4   2    2.15    0.61 
  11   4  -2    2.17    0.70 
 -11   4   2    2.58    0.98 
 -10  -4   2    2.74    0.70 
  10  -4  -2    4.81    0.78 
 -10  -4   2    3.32    0.72 
 -10  -4   2    4.49    0.58 
 -10   4   2    3.09    0.73 
 -10   4   2    3.29    1.13 
  -9  -4   2    2.95    0.70 
   9  -4  -2    3.29    0.72 
  -9  -4   2    3.84    0.58 
  -9   4   2    3.95    1.12 
  -8  -4   2   19.28    3.15 
   8  -4  -2   19.93    2.81 
  -8   4   2   21.25    3.13 
  -7  -4   2    2.49    0.48 
  -7  -4   2    3.69    0.84 
  -7   4   2    1.47    0.87 
   6  -4  -2    0.72    0.46 
  -6  -4   2   -0.15    0.58 
  -6  -4   2    0.91    0.30 
  -6   4   2    1.47    0.73 
  -6   4   2    0.77    0.45 
  -6   4   2    0.80    0.39 
   5  -4  -2    4.24    0.78 
  -5  -4   2    4.34    0.55 
  -5  -4   2    5.47    0.96 
  -5   4   2    2.59    0.66 
  -5   4   2    2.41    0.61 
  -5   4   2    3.76    0.88 
  -4  -4   2   53.71    8.45 
  -4  -4   2   60.71    4.31 
   4  -4  -2   61.66    7.17 
  -4  -4   2   67.10    5.86 
  -4  -4   2   63.74    6.83 
  -4   4   2   58.42    6.88 
  -3  -4   2   88.67    6.36 
   3  -4  -2   94.87    9.65 
  -3  -4   2   97.06    8.66 
  -3   4   2   83.75   10.14 
  -2  -4   2  163.02   11.43 
   2  -4  -2  162.33   17.25 
  -2  -4   2  167.15   15.56 
  -1  -4   2  190.93   17.28 
  -1  -4   2  196.87   14.62 
   1  -4  -2  163.78   19.14 
  -1   4   2  181.04   20.22 
   1   4  -2  173.90   19.07 
   1   4  -2  187.91   12.69 
   0  -4   2  137.15   10.84 
   0  -4  -2  130.56   14.19 
   0   4  -2  134.03   14.16 
   0   4   2  138.31   14.98 
  -1  -4  -2  104.46   10.30 
  -1  -4  -2   97.24    9.29 
  -1  -4  -2   93.62    7.82 
  -1   4  -2   98.00   10.30 
   1   4   2   98.61   10.85 
   1   4   2   96.97    6.85 
  -2  -4  -2   47.49    4.69 
  -2  -4  -2   43.08    4.23 
  -2   4  -2   40.88    4.70 
   2   4   2   39.15    3.11 
   2   4   2   47.86    4.89 
  -3  -4  -2  193.60   19.36 
  -3   4  -2  175.41   19.40 
  -4  -4  -2   37.12    3.39 
  -4  -4  -2   33.41    3.08 
   4  -4   2   30.58    3.72 
  -4  -4  -2   29.06    3.57 
  -4   4  -2   25.78    3.41 
   5  -4   2   61.49    7.24 
  -5  -4  -2   60.63    5.95 
  -5  -4  -2   60.67    6.93 
  -5   4  -2   64.48    6.62 
   6  -4   2    3.37    0.50 
  -6  -4  -2    3.63    0.66 
  -6  -4  -2    4.23    0.60 
  -6   4  -2    2.72    0.64 
   7  -4   2    4.98    0.65 
  -7  -4  -2    4.70    0.85 
  -7  -4  -2    5.76    0.76 
   7  -4   2    6.50    1.23 
  -7   4  -2    4.12    0.81 
   8  -4   2   15.90    2.45 
  -8  -4  -2   15.86    1.76 
   8  -4   2   15.79    1.71 
  -8   4  -2   17.97    2.65 
   9  -4   2    0.11    0.82 
   9  -4   2    0.98    0.59 
  -9  -4  -2    0.12    0.32 
  -9   4  -2    0.46    0.96 
  -9   4  -2    1.84    0.62 
  10  -4   2   -0.33    0.52 
 -10  -4  -2    0.45    0.32 
  10  -4   2    1.13    0.88 
 -10  -4  -2    0.84    0.52 
 -10   4  -2   -0.60    1.00 
 -10   4  -2    0.69    0.54 
  11  -4   2    1.43    0.92 
 -11  -4  -2    2.71    0.41 
  11  -4   2    1.44    0.60 
 -11  -4  -2    1.30    0.53 
 -11   4  -2    0.68    0.53 
 -11   4  -2    0.38    1.06 
  11   4   2    0.68    0.56 
  12  -4   2    3.78    0.67 
  12  -4   2    1.67    0.82 
 -12  -4  -2    3.50    0.65 
 -12  -4  -2    3.32    0.45 
  12   4   2    5.03    0.73 
 -12   4  -2    2.85    0.63 
  13  -4   2    0.03    0.29 
 -13  -4  -2    0.05    0.34 
 -13   4  -2    0.37    0.37 
 -13  -5   2    2.06    0.45 
 -13   5   2    1.62    0.43 
  13   5  -2    2.51    0.57 
 -12  -5   2    0.87    0.44 
 -12  -5   2    1.01    0.24 
  12  -5  -2    0.85    0.35 
  12   5  -2    0.84    0.54 
  12   5  -2    0.64    0.42 
 -12   5   2    0.40    0.44 
 -11  -5   2    0.59    0.29 
  11  -5  -2    1.94    0.47 
 -11  -5   2    0.42    0.46 
 -11  -5   2    0.58    0.58 
  11   5  -2    1.75    0.57 
  11   5  -2    1.52    0.65 
 -11   5   2    1.36    0.52 
 -10  -5   2    6.26    0.81 
 -10  -5   2    7.10    1.04 
  10  -5  -2    9.04    1.00 
 -10  -5   2    6.80    1.03 
  10  -5  -2    4.91    1.21 
 -10   5   2    7.24    1.04 
   9  -5  -2   24.97    3.22 
  -9  -5   2   27.27    2.96 
   9  -5  -2   26.44    3.50 
  -9  -5   2   25.71    2.51 
  -9  -5   2   26.20    2.94 
   9  -5  -2   23.95    2.59 
  -9   5   2   26.43    2.92 
  -9   5   2   29.57    4.03 
   8  -5  -2    0.37    0.70 
  -8   5   2    1.27    0.88 
   7  -5  -2   -0.35    0.63 
  -7  -5   2    0.72    0.34 
  -7   5   2    0.43    0.79 
   6  -5  -2   13.92    1.90 
  -6  -5   2   13.55    1.42 
  -6   5   2   11.49    1.68 
  -6   5   2   13.22    2.09 
  -6   5   2   13.05    1.74 
  -5  -5   2    4.76    0.62 
   5  -5  -2    5.04    0.88 
  -5   5   2    3.37    0.72 
  -5   5   2    4.44    0.82 
  -4  -5   2    3.38    0.49 
  -4  -5   2    3.52    0.60 
   4  -5  -2    3.23    0.71 
  -4   5   2    3.24    0.63 
  -3  -5   2   13.80    1.34 
  -3  -5   2   13.59    1.59 
  -3  -5   2   12.88    0.96 
   3  -5  -2   14.30    1.66 
   3  -5  -2   11.17    1.66 
  -3   5   2   12.40    1.60 
  -1  -5   2  114.94   10.33 
  -1  -5   2  116.24    8.76 
   1  -5  -2  101.09   10.29 
   1  -5  -2  113.68   11.49 
  -1   5   2  104.46   12.10 
   1   5  -2  100.72   11.39 
   1   5  -2  113.33    7.58 
   0  -5   2   27.62    2.34 
   0  -5  -2   25.35    2.72 
   0  -5  -2   28.40    3.09 
   0   5   2   30.47    3.22 
   0   5  -2   30.48    3.05 
  -1  -5  -2   18.80    2.12 
  -1  -5  -2   18.22    1.88 
  -1  -5  -2   18.53    1.55 
   1  -5   2   16.92    1.61 
  -1   5  -2   21.58    2.14 
   1   5   2   19.48    1.39 
   1   5   2   20.31    2.18 
  -2  -5  -2   82.87    8.59 
  -2  -5  -2   68.52    6.52 
  -2  -5  -2   84.26    7.76 
   2   5   2   87.72    9.02 
   2   5   2   83.15    5.71 
  -2   5  -2   83.53    8.62 
  -3  -5  -2   58.09    5.98 
  -3  -5  -2   52.42    6.30 
   3  -5   2   52.91    6.59 
  -3  -5  -2   58.57    5.41 
  -3   5  -2   60.18    6.04 
   4  -5   2   11.99    1.70 
  -4  -5  -2   13.86    1.43 
  -4  -5  -2   13.16    1.54 
  -4  -5  -2   12.54    1.69 
  -4   5  -2   16.88    1.67 
   5  -5   2    5.15    0.84 
  -5  -5  -2    4.93    0.78 
  -5  -5  -2    4.44    0.65 
  -5   5  -2    3.72    0.76 
  -6  -5  -2    5.40    0.74 
   6  -5   2    4.99    0.90 
  -6  -5  -2    4.66    0.85 
  -6   5  -2    5.55    0.90 
  -7  -5  -2    3.56    0.59 
   7  -5   2    1.91    0.91 
  -7  -5  -2    3.12    0.70 
  -7   5  -2    3.32    0.70 
   8  -5   2    6.18    1.37 
  -8  -5  -2    6.53    0.93 
  -8   5  -2    7.47    1.49 
  -9  -5  -2    6.16    0.80 
  -9  -5  -2    5.86    1.01 
   9  -5   2    5.72    0.96 
   9  -5   2    8.55    1.53 
  -9  -5  -2    7.90    1.06 
  -9   5  -2    7.70    1.08 
  -9   5  -2    5.97    1.55 
 -10  -5  -2   21.49    2.07 
 -10  -5  -2   19.76    2.46 
 -10  -5  -2   21.74    2.45 
  10  -5   2   23.71    3.14 
  10  -5   2   20.56    2.22 
 -10   5  -2   22.85    2.47 
 -10   5  -2   19.54    3.28 
 -11  -5  -2    1.43    0.32 
 -11  -5  -2    1.91    0.55 
  11  -5   2    1.10    0.96 
  11  -5   2    1.35    0.57 
  11   5   2    2.56    0.70 
 -11   5  -2    2.00    0.60 
  12  -5   2    0.88    0.41 
 -12  -5  -2    0.22    0.41 
 -12  -5  -2    0.75    0.21 
  12  -5   2    0.18    0.63 
 -12   5  -2    1.16    0.47 
  12   5   2   -0.51    0.44 
 -13  -5  -2    0.01    0.33 
 -13   5  -2    0.70    0.38 
 -13  -6   2    1.46    0.39 
  13   6  -2    1.59    0.49 
 -13   6   2    1.96    0.41 
 -12  -6   2    4.74    0.83 
  12  -6  -2    6.59    0.69 
 -12   6   2    6.34    0.86 
  12   6  -2    5.12    0.91 
  12   6  -2    6.16    0.83 
 -11  -6   2    0.72    0.45 
  11  -6  -2    0.06    0.44 
 -11  -6   2   -0.02    0.47 
  11  -6  -2    0.17    0.32 
 -11  -6   2   -0.07    0.20 
 -11   6   2    0.36    0.47 
  11   6  -2    0.15    0.57 
 -10  -6   2    3.29    0.45 
  10  -6  -2    2.44    0.90 
  10  -6  -2    3.24    0.57 
 -10  -6   2    1.23    0.63 
 -10  -6   2    2.98    0.67 
  10  -6  -2    2.30    0.94 
 -10   6   2    3.43    0.68 
 -10   6   2    3.77    1.19 
  -9  -6   2    1.89    0.64 
   9  -6  -2    0.84    0.77 
   9  -6  -2    2.42    0.50 
   9  -6  -2    1.25    0.81 
  -9  -6   2    1.13    0.34 
  -9  -6   2    2.67    0.63 
  -9   6   2    2.69    0.65 
  -9   6   2    0.45    0.99 
   8  -6  -2    2.98    0.91 
  -8   6   2    2.19    1.09 
   7  -6  -2    6.14    1.23 
   7  -6  -2    5.98    1.12 
  -7  -6   2    5.88    0.84 
  -7   6   2    5.45    1.04 
  -7   6   2    8.02    1.42 
  -7   6   2    6.70    1.12 
   6  -6  -2   24.59    3.17 
  -6  -6   2   26.38    2.58 
  -6   6   2   25.93    3.07 
  -6   6   2   23.65    2.95 
  -6   6   2   26.88    3.77 
  -5  -6   2   53.81    5.29 
  -5  -6   2   58.21    6.18 
   5  -6  -2   52.21    6.47 
  -5   6   2   53.70    5.95 
  -5   6   2   54.85    6.24 
   4  -6  -2   13.69    1.80 
  -4  -6   2   11.72    1.32 
  -4  -6   2   12.90    1.58 
  -4   6   2   12.18    1.66 
   3  -6  -2   14.49    1.95 
  -3  -6   2   15.34    1.85 
  -3  -6   2   15.50    1.36 
  -3  -6   2   16.94    1.58 
   3  -6  -2   15.68    1.86 
  -3   6   2   14.18    1.88 
   2  -6  -2   65.60    6.58 
   2  -6  -2   57.21    7.16 
  -2  -6   2   62.23    4.98 
  -2  -6   2   64.02    5.86 
  -2   6   2   58.21    6.89 
   2   6  -2   60.42    4.28 
  -1  -6   2    8.52    0.85 
   1  -6  -2    6.54    1.03 
  -1  -6   2    8.21    0.77 
  -1   6   2    5.91    1.01 
   1   6  -2    8.22    0.93 
   1   6  -2    8.04    0.58 
   0  -6  -2    4.88    0.55 
   0  -6  -2    3.82    0.69 
   0  -6   2    3.23    0.51 
   0   6  -2    5.32    0.69 
   0   6   2    6.16    0.73 
  -1  -6  -2   33.62    3.31 
   1  -6   2   33.53    2.83 
  -1  -6  -2   34.23    3.71 
   1   6   2   34.99    3.86 
  -1   6  -2   34.46    3.71 
   2  -6   2    3.40    0.66 
  -2  -6  -2    3.84    0.62 
  -2  -6  -2    3.78    0.51 
  -2  -6  -2    3.53    0.60 
  -2   6  -2    4.06    0.67 
  -3  -6  -2    8.50    0.96 
  -3  -6  -2    7.98    1.12 
  -3  -6  -2    6.76    1.03 
   3  -6   2    9.06    1.22 
  -3   6  -2   10.27    1.22 
   4  -6   2   44.83    5.24 
  -4  -6  -2   44.21    5.02 
  -4  -6  -2   47.27    4.31 
  -4   6  -2   39.71    4.80 
  -5  -6  -2   19.63    2.02 
  -5  -6  -2   17.88    2.37 
   5  -6   2   20.27    2.46 
  -5   6  -2   20.78    2.32 
  -6  -6  -2    2.06    0.57 
   6  -6   2    2.48    0.65 
  -6  -6  -2    2.88    0.52 
  -6   6  -2    2.89    0.64 
   7  -6   2    2.76    0.97 
  -7  -6  -2    3.04    0.67 
  -7  -6  -2    2.58    0.55 
  -7   6  -2    2.94    0.74 
  -8  -6  -2    7.37    1.08 
   8  -6   2    8.69    1.57 
  -8  -6  -2    8.54    1.28 
  -9  -6  -2    2.00    0.60 
  -9  -6  -2    0.88    0.31 
   9  -6   2    0.15    0.47 
   9  -6   2    1.04    0.88 
  -9   6  -2    1.46    1.10 
  -9   6  -2    0.31    0.58 
  10  -6   2    1.24    0.89 
 -10  -6  -2    0.42    0.50 
 -10  -6  -2   -0.14    0.55 
  10  -6   2    0.26    0.47 
 -10  -6  -2    0.66    0.26 
 -10   6  -2   -0.18    0.98 
 -10   6  -2    0.89    0.55 
 -11  -6  -2    0.55    0.22 
 -11  -6  -2    1.25    0.51 
  11  -6   2    1.08    0.75 
 -11  -6  -2    0.24    0.48 
  11  -6   2    0.80    0.44 
 -11   6  -2   -0.10    0.49 
  12  -6   2    0.98    0.30 
  12  -6   2    0.70    0.65 
 -12  -6  -2    1.55    0.47 
 -12   6  -2    0.58    0.43 
 -13   6  -2    0.58    0.35 
 -13  -7   2    2.15    0.44 
  13   7  -2    2.26    0.50 
 -12  -7   2    0.65    0.39 
 -12   7   2    1.54    0.47 
  12   7  -2    0.59    0.49 
 -11  -7   2    1.46    0.54 
 -11  -7   2    0.59    0.47 
  11  -7  -2    2.06    0.74 
  11  -7  -2    1.46    0.77 
  11  -7  -2    1.51    0.34 
 -11   7   2    2.35    0.56 
 -10  -7   2    4.35    0.71 
  10  -7  -2    0.73    0.82 
 -10  -7   2    1.23    0.28 
 -10  -7   2    1.09    0.57 
  10  -7  -2    1.90    0.41 
  10  -7  -2    1.03    0.79 
 -10   7   2    0.56    0.96 
  -9  -7   2    8.65    0.81 
  -9  -7   2    7.22    1.08 
   9  -7  -2    6.67    0.88 
   9  -7  -2    6.23    1.37 
  -9  -7   2    5.25    1.00 
   9  -7  -2    8.06    1.38 
  -9   7   2    7.30    1.62 
  -8  -7   2    7.89    0.85 
   8  -7  -2    8.81    1.46 
  -8  -7   2    8.39    1.07 
   8  -7  -2    7.31    0.92 
  -8   7   2    7.01    1.63 
   7  -7  -2    1.66    0.73 
   7  -7  -2    0.83    0.54 
  -7  -7   2    0.26    0.35 
  -7   7   2    0.59    0.89 
   6  -7  -2   19.93    3.00 
  -6  -7   2   23.90    2.34 
   6  -7  -2   21.67    2.87 
  -6   7   2   25.01    2.82 
  -6   7   2   21.14    2.70 
  -6   7   2   24.24    3.40 
  -5  -7   2   26.32    2.42 
   5  -7  -2   22.97    2.97 
  -5  -7   2   24.16    2.82 
  -5  -7   2   24.12    2.08 
  -5   7   2   21.35    2.86 
  -5   7   2   23.29    2.79 
  -4  -7   2    2.22    0.42 
   4  -7  -2    2.15    0.62 
  -4  -7   2    1.78    0.48 
  -4  -7   2    2.34    0.42 
  -4   7   2    2.79    0.59 
  -3  -7   2    1.14    0.32 
  -3  -7   2    1.37    0.37 
  -3  -7   2    1.06    0.28 
   3  -7  -2    1.00    0.47 
   3  -7  -2    1.54    0.50 
  -3   7   2    1.02    0.40 
   2  -7  -2  144.95   15.48 
  -2  -7   2  139.52   11.78 
  -2  -7   2  154.44   16.22 
   2  -7  -2  143.00   17.00 
  -2  -7   2  152.66   13.92 
  -2   7   2  142.83   16.33 
  -1  -7   2  177.91   16.27 
   1  -7  -2  168.58   18.06 
  -1  -7   2  167.28   13.78 
   1  -7  -2  175.73   19.86 
   1   7  -2  161.57   17.96 
  -1   7   2  178.30   19.06 
   0  -7  -2    7.04    1.14 
   0  -7   2    8.40    0.87 
   0  -7  -2    7.90    0.93 
   0  -7  -2    8.62    1.16 
   0   7  -2   10.12    1.14 
   0   7   2   10.52    1.15 
   1  -7   2   19.38    1.81 
  -1  -7  -2   18.29    2.08 
   1  -7   2   20.32    2.56 
  -1  -7  -2   19.38    2.38 
  -1  -7  -2   18.95    2.46 
  -1   7  -2   26.63    2.42 
   1   7   2   26.46    2.46 
  -2  -7  -2    8.31    1.09 
  -2  -7  -2    8.07    1.13 
   2  -7   2    9.41    1.23 
  -2  -7  -2    6.80    0.91 
  -2   7  -2    9.80    1.19 
  -3  -7  -2   20.01    2.48 
  -3  -7  -2   22.35    2.13 
   3  -7   2   20.40    2.59 
  -3  -7  -2   20.09    2.35 
  -3   7  -2   22.22    2.42 
  -4  -7  -2    4.75    0.88 
  -4  -7  -2    7.12    0.81 
   4  -7   2    5.59    0.97 
  -4   7  -2    5.91    0.97 
  -5  -7  -2   33.82    3.91 
   5  -7   2   31.98    4.05 
  -5  -7  -2   32.67    3.34 
  -5   7  -2   37.14    3.80 
   6  -7   2    1.28    0.78 
  -6  -7  -2    2.44    0.60 
  -6  -7  -2    1.88    0.47 
   6  -7   2    1.97    0.60 
  -6   7  -2    1.29    0.61 
   7  -7   2   10.56    1.62 
  -7  -7  -2    8.50    1.31 
  -7  -7  -2    8.33    1.15 
   7  -7   2    9.15    1.61 
  -8  -7  -2    8.99    1.37 
   8  -7   2   10.97    1.72 
  -8  -7  -2    9.01    0.96 
   8  -7   2    9.84    1.13 
  -8  -7  -2    8.14    1.18 
   9  -7   2    3.64    0.69 
  -9  -7  -2    3.89    0.76 
   9  -7   2    4.08    1.19 
  -9  -7  -2    4.20    0.50 
  -9   7  -2    3.49    1.33 
  10  -7   2    8.79    1.51 
 -10  -7  -2    5.46    0.62 
 -10  -7  -2    6.46    0.99 
  10  -7   2    7.57    0.85 
 -10   7  -2    5.08    1.49 
 -10   7  -2    4.71    0.94 
  11  -7   2   -0.22    0.67 
 -11  -7  -2    0.66    0.49 
 -11   7  -2   -0.10    0.45 
  12  -7   2    1.72    0.66 
 -12  -7  -2    0.66    0.46 
 -12   7  -2    1.41    0.48 
 -13   7  -2    0.92    0.35 
 -13  -8   2    0.28    0.28 
 -12  -8   2    0.02    0.36 
  12   8  -2    0.06    0.44 
 -12   8   2    0.86    0.57 
  11  -8  -2    2.51    0.82 
 -11  -8   2    3.49    0.66 
 -11  -8   2    2.22    0.59 
  11  -8  -2    2.20    0.77 
  10  -8  -2    1.94    0.85 
 -10  -8   2    1.37    0.54 
 -10  -8   2    1.50    0.54 
  10  -8  -2    0.63    0.74 
 -10   8   2    0.94    1.00 
  -9  -8   2   18.77    2.28 
  -9  -8   2   18.90    2.34 
   9  -8  -2   18.68    2.80 
   9  -8  -2   23.44    2.72 
   9  -8  -2   19.36    1.94 
  -9  -8   2   20.97    2.35 
  -9   8   2   22.33    3.21 
  -8  -8   2    2.98    0.68 
   8  -8  -2    1.73    0.79 
   8  -8  -2    1.21    0.66 
   8  -8  -2    1.64    0.85 
   8  -8  -2    2.63    0.44 
  -8  -8   2    2.11    0.53 
   8  -8  -2    1.60    0.68 
  -8   8   2    0.94    1.06 
   7  -8  -2   21.66    2.83 
   7  -8  -2   21.79    2.98 
  -7  -8   2   22.21    2.31 
  -7   8   2   22.69    3.38 
  -6  -8   2   18.56    2.05 
   6  -8  -2   19.82    2.56 
   6  -8  -2   20.00    2.68 
  -6   8   2   21.25    2.60 
  -5  -8   2    3.36    0.59 
  -5  -8   2    3.52    0.69 
  -5  -8   2    3.59    0.58 
   5  -8  -2    4.31    0.89 
  -5   8   2    2.98    0.74 
  -5   8   2    3.59    0.84 
   4  -8  -2    8.68    1.24 
  -4  -8   2    6.29    0.77 
  -4  -8   2    7.50    0.88 
  -4  -8   2    5.57    0.95 
  -4   8   2    6.04    1.07 
   3  -8  -2   15.28    1.89 
  -3  -8   2   13.06    1.73 
   3  -8  -2   15.59    1.89 
  -3  -8   2   13.29    1.33 
  -3  -8   2   13.96    1.47 
  -3   8   2   13.56    1.89 
   2  -8  -2    6.23    0.95 
   2  -8  -2    5.47    0.95 
  -2  -8   2    4.45    0.75 
  -2  -8   2    5.03    0.66 
   2  -8  -2    6.35    0.83 
  -2  -8   2    4.78    0.62 
  -2   8   2    4.83    0.85 
   1  -8  -2   13.15    1.53 
   1  -8  -2    9.14    1.33 
  -1  -8   2   10.82    1.29 
   1  -8  -2   10.85    1.33 
  -1  -8   2   10.33    1.00 
  -1   8   2    6.80    1.30 
   0  -8   2   29.92    2.62 
   0  -8  -2   30.74    3.58 
   0  -8  -2   31.21    3.03 
   0  -8   2   33.02    3.72 
   0  -8  -2   31.46    3.76 
   0  -8  -2   30.50    3.46 
   0   8   2   32.09    3.60 
   0   8  -2   29.89    3.40 
   1  -8   2   14.10    1.86 
  -1  -8  -2   13.54    1.80 
  -1  -8  -2   14.28    1.82 
  -1  -8  -2   13.45    1.50 
   1  -8   2   14.27    1.33 
  -1   8  -2   16.05    1.77 
   1   8   2   17.38    1.78 
  -2  -8  -2    6.38    0.94 
  -2  -8  -2    6.04    0.96 
  -2  -8  -2    6.73    0.80 
   2  -8   2    7.30    1.04 
  -2   8  -2    6.28    1.01 
  -3  -8  -2    5.53    0.75 
  -3  -8  -2    5.59    0.88 
   3  -8   2    6.26    0.98 
  -3   8  -2    5.24    0.92 
  -4  -8  -2    9.53    1.41 
  -4  -8  -2   11.00    1.23 
   4  -8   2   10.91    1.53 
  -4   8  -2   10.24    1.47 
   5  -8   2   18.30    2.38 
  -5  -8  -2   19.69    1.98 
  -5  -8  -2   18.07    2.31 
  -5   8  -2   18.81    2.36 
  -6  -8  -2   15.14    2.06 
  -6  -8  -2   14.36    1.74 
   6  -8   2   13.79    2.13 
   6  -8   2   18.01    2.35 
  -6   8  -2   18.76    2.15 
   7  -8   2    2.27    0.89 
  -7  -8  -2    2.05    0.54 
   7  -8   2    3.29    1.05 
  -7  -8  -2    1.89    0.64 
   8  -8   2    8.62    0.95 
  -8  -8  -2    8.13    1.04 
   8  -8   2    7.88    1.43 
   8  -8   2    6.59    1.39 
  -8  -8  -2    7.22    1.24 
   8  -8   2    7.12    1.11 
  -8  -8  -2    7.24    1.08 
   8  -8   2    8.10    1.55 
   9  -8   2    2.16    0.96 
  -9  -8  -2    0.55    0.55 
   9  -8   2    2.30    0.97 
   9  -8   2    1.69    0.43 
  -9   8  -2    2.64    1.18 
  10  -8   2   -0.38    0.65 
 -10  -8  -2   -0.34    0.48 
 -10   8  -2    0.81    1.05 
 -10   8  -2    0.40    0.53 
 -11  -8  -2    0.09    0.46 
  11  -8   2    0.49    0.67 
 -11   8  -2    0.64    0.48 
  12  -8   2    0.56    0.57 
 -12  -8  -2    1.65    0.43 
 -12   8  -2    0.57    0.42 
 -13   8  -2    0.07    0.28 
 -12  -9   2    4.03    0.63 
  12   9  -2    3.97    0.68 
 -12   9   2    3.29    0.75 
 -11  -9   2    1.38    0.45 
 -11  -9   2    0.40    0.44 
  11  -9  -2    0.25    0.44 
  11  -9  -2    1.30    0.60 
 -10  -9   2    5.17    0.74 
  10  -9  -2    4.63    1.08 
  10  -9  -2    4.32    1.06 
 -10  -9   2    5.28    0.81 
 -10  -9   2    3.76    0.81 
  -9  -9   2    2.88    0.67 
   9  -9  -2    1.67    0.80 
   9  -9  -2    1.10    0.77 
  -9  -9   2    1.35    0.45 
  -9  -9   2    1.16    0.60 
  -9   9   2    1.21    1.05 
   8  -9  -2    3.60    0.89 
  -8  -9   2    5.72    0.82 
   8  -9  -2    4.38    1.09 
  -8  -9   2    4.33    0.89 
  -8  -9   2    5.16    0.85 
   8  -9  -2    5.28    1.21 
   8  -9  -2    4.74    1.05 
  -8   9   2    5.60    1.40 
   7  -9  -2    4.15    0.75 
   7  -9  -2    1.66    0.69 
   7  -9  -2    1.94    0.83 
  -7  -9   2    1.40    0.48 
  -7   9   2    2.07    1.12 
   6  -9  -2   11.15    1.73 
  -6  -9   2    9.21    1.28 
   6  -9  -2   12.60    1.79 
   5  -9  -2    3.70    0.84 
  -5  -9   2    3.24    0.55 
  -5  -9   2    1.72    0.56 
  -5  -9   2    2.49    0.62 
   5  -9  -2    3.57    0.85 
  -5   9   2    1.81    0.74 
   4  -9  -2    0.02    0.44 
  -4  -9   2    0.55    0.40 
  -4  -9   2    1.05    0.39 
  -4  -9   2    0.36    0.28 
  -4   9   2    0.89    0.43 
  -4   9   2    0.00    0.49 
  -3  -9   2    9.08    0.90 
   3  -9  -2    8.34    1.29 
  -3  -9   2    6.57    0.90 
  -3  -9   2    7.59    1.10 
  -3   9   2    7.79    1.23 
  -2  -9   2   27.62    3.15 
  -2  -9   2   27.92    2.70 
  -2  -9   2   24.59    2.32 
   2  -9  -2   29.88    3.38 
   2  -9  -2   25.53    3.10 
  -2   9   2   27.07    3.25 
   1  -9  -2   37.66    4.48 
   1  -9  -2   38.70    4.35 
   1  -9  -2   38.60    4.72 
  -1  -9   2   39.40    3.29 
  -1   9   2   42.25    4.55 
   0  -9  -2   40.59    4.44 
   0  -9   2   39.73    4.60 
   0  -9   2   37.76    3.25 
   0  -9  -2   38.40    4.28 
   0  -9  -2   40.66    4.66 
   0   9   2   38.45    4.46 
   0   9  -2   35.80    4.21 
   1  -9   2   10.73    1.56 
  -1  -9  -2   12.65    1.59 
  -1  -9  -2   11.73    1.26 
  -1  -9  -2   11.73    1.56 
  -1   9  -2   14.68    1.64 
  -2  -9  -2   15.24    1.90 
  -2  -9  -2   14.63    1.58 
   2  -9   2   14.31    1.95 
  -2   9  -2   19.05    2.04 
  -3  -9  -2    0.27    0.28 
  -3  -9  -2   -0.25    0.28 
   3  -9   2    0.88    0.39 
  -3   9  -2    1.54    0.51 
  -4  -9  -2    1.28    0.48 
  -4  -9  -2    1.88    0.43 
   4  -9   2    1.68    0.56 
  -4   9  -2    1.51    0.59 
  -5  -9  -2   32.04    3.70 
   5  -9   2   29.34    3.98 
   5  -9   2   34.84    3.88 
  -5  -9  -2   30.16    3.17 
  -5   9  -2   30.15    3.60 
  -6  -9  -2    5.70    1.07 
   6  -9   2    8.00    1.35 
   6  -9   2    7.00    1.38 
   6  -9   2    6.11    1.12 
  -6  -9  -2    6.54    0.92 
  -7  -9  -2    6.73    1.20 
   7  -9   2    7.46    1.27 
   7  -9   2    8.96    1.54 
   8  -9   2    9.66    1.54 
  -8  -9  -2    6.31    1.09 
   8  -9   2    6.31    1.13 
  -8  -9  -2    6.52    0.98 
   8  -9   2    4.85    1.22 
   8  -9   2    6.06    0.97 
   8  -9   2    5.26    1.24 
  -8  -9  -2    5.93    0.89 
   9  -9   2    0.51    0.84 
  -9  -9  -2    2.02    0.51 
  -9  -9  -2    1.77    0.58 
   9  -9   2    2.18    0.85 
  -9   9  -2    2.23    1.21 
 -10  -9  -2    1.92    0.60 
  10  -9   2    2.01    0.80 
  10  -9   2    0.84    0.82 
 -10   9  -2    2.68    0.65 
  11  -9   2    0.52    0.63 
 -11  -9  -2    0.61    0.46 
 -11   9  -2    1.08    0.48 
 -12  -9  -2    1.10    0.40 
 -12   9  -2    1.04    0.39 
 -12 -10   2    1.88    0.45 
 -12  10   2    2.50    0.60 
  12  10  -2    2.27    0.52 
  11 -10  -2    0.61    0.53 
  11 -10  -2    0.36    0.43 
 -11 -10   2    1.85    0.46 
 -11 -10   2    1.63    0.48 
 -10 -10   2    0.30    0.43 
  10 -10  -2    0.38    0.71 
 -10 -10   2    0.79    0.35 
  10 -10  -2    0.38    0.58 
 -10 -10   2    0.09    0.48 
   9 -10  -2    1.51    0.77 
   9 -10  -2    1.56    0.60 
  -9 -10   2    2.27    0.60 
  -9 -10   2    3.06    0.70 
  -9 -10   2    1.47    0.45 
   9 -10  -2    0.80    0.75 
  -9  10   2    0.45    1.06 
  -8 -10   2    1.81    0.57 
  -8 -10   2    0.87    0.44 
   8 -10  -2    1.03    0.59 
   8 -10  -2    1.33    0.69 
   8 -10  -2    2.14    0.81 
  -8 -10   2    3.42    0.73 
   8 -10  -2    0.89    0.82 
  -8  10   2   -0.56    1.07 
   7 -10  -2    2.48    0.94 
  -7 -10   2    3.90    0.66 
   7 -10  -2    3.61    0.89 
  -7 -10   2    2.87    0.68 
   7 -10  -2    2.95    0.79 
   7 -10  -2    2.92    1.06 
  -7 -10   2    3.98    0.82 
  -7  10   2    3.98    1.33 
  -6 -10   2    4.26    0.74 
   6 -10  -2    5.16    1.07 
   6 -10  -2    4.34    0.91 
   6 -10  -2    5.12    1.06 
   5 -10  -2    8.92    1.41 
   5 -10  -2    9.48    1.44 
  -5 -10   2    7.25    0.99 
  -5 -10   2    6.45    1.14 
   4 -10  -2    4.88    0.99 
   4 -10  -2    3.64    0.90 
  -4 -10   2    4.12    0.63 
  -4 -10   2    4.06    0.68 
  -4 -10   2    3.43    0.73 
  -4  10   2    5.53    1.06 
  -3 -10   2   13.26    1.58 
   3 -10  -2   19.04    2.27 
  -3 -10   2   15.05    1.88 
  -3 -10   2   13.51    1.47 
  -3  10   2   18.29    2.18 
   2 -10  -2    6.07    1.07 
  -2 -10   2    5.71    0.79 
  -2 -10   2    6.28    0.79 
   2 -10  -2    7.06    1.18 
  -2 -10   2    6.05    0.94 
  -2  10   2    9.39    1.22 
   1 -10  -2    8.89    1.48 
  -1 -10   2    9.89    1.10 
   1 -10  -2   11.14    1.60 
   1 -10  -2   11.89    1.47 
  -1  10   2   11.66    1.56 
   0 -10   2    2.24    0.54 
   0 -10  -2    2.77    0.65 
   0 -10  -2    2.31    0.61 
   0 -10  -2    2.50    0.55 
   0 -10   2    2.02    0.47 
   0  10   2    2.63    0.57 
   1 -10   2    8.26    1.25 
  -1 -10  -2    8.67    1.20 
  -1 -10  -2    7.04    1.22 
  -1 -10  -2    8.33    0.96 
  -1  10  -2    9.03    1.25 
   2 -10   2   26.05    3.03 
  -2 -10  -2   22.25    2.46 
  -2 -10  -2   25.48    2.93 
  -2  10  -2   24.92    2.84 
   3 -10   2    1.59    0.54 
  -3 -10  -2    2.24    0.45 
  -3 -10  -2    1.28    0.48 
  -3  10  -2    1.99    0.66 
  -4 -10  -2   14.29    1.70 
   4 -10   2   15.47    2.00 
  -4 -10  -2   14.97    2.03 
  -4  10  -2   16.27    2.09 
   5 -10   2    1.96    0.70 
  -5 -10  -2    2.11    0.64 
   5 -10   2    1.29    0.58 
   5 -10   2    2.51    0.86 
  -5 -10  -2    2.33    0.51 
   6 -10   2    5.33    1.22 
   6 -10   2    2.28    0.74 
  -6 -10  -2    2.45    0.59 
   6 -10   2    3.46    0.95 
  -6 -10  -2    4.26    0.81 
   7 -10   2    0.71    0.53 
  -7 -10  -2    0.72    0.50 
  -7 -10  -2   -0.41    0.35 
  -7 -10  -2   -0.54    0.45 
   7 -10   2   -0.36    0.69 
   7 -10   2   -0.45    0.60 
   7 -10   2    0.31    0.63 
   7 -10   2    0.29    0.54 
   8 -10   2    8.38    1.15 
   8 -10   2    8.66    1.31 
   8 -10   2    8.59    1.44 
  -8 -10  -2    8.84    1.08 
   8 -10   2    6.79    1.45 
   8 -10   2   10.01    1.58 
  -8 -10  -2    9.42    1.15 
  -8 -10  -2    4.08    1.12 
  -9 -10  -2    0.47    0.47 
   9 -10   2   -0.41    0.57 
   9 -10   2   -0.12    0.67 
  -9 -10  -2   -0.27    0.35 
   9 -10   2    0.31    0.76 
  -9  10  -2   -0.88    1.05 
 -10 -10  -2    0.20    0.47 
  10 -10   2    0.07    0.71 
  10 -10   2    0.27    0.63 
 -10  10  -2    1.46    0.57 
  11 -10   2    1.95    0.73 
 -11 -10  -2    1.88    0.54 
 -11  10  -2    2.93    0.57 
 -12 -10  -2    1.57    0.41 
 -12  10  -2    1.93    0.42 
 -12  11   2    1.69    0.49 
  12  11  -2    0.99    0.41 
 -11 -11   2   -0.01    0.26 
 -11 -11   2    0.54    0.38 
  11 -11  -2    0.41    0.39 
 -11 -11   2    0.71    0.41 
  10 -11  -2    1.82    0.76 
 -10 -11   2    0.85    0.51 
 -10 -11   2    0.79    0.36 
 -10 -11   2    2.48    0.53 
  10 -11  -2    0.99    0.58 
   9 -11  -2    0.62    0.59 
   9 -11  -2    1.73    0.60 
  -9 -11   2    1.23    0.57 
  -9 -11   2    1.48    0.56 
  -9 -11   2    1.07    0.41 
   9 -11  -2    0.78    0.83 
   8 -11  -2   21.73    2.84 
   8 -11  -2   18.75    2.46 
   8 -11  -2   18.86    2.75 
   8 -11  -2   22.32    2.64 
  -8 -11   2   19.00    2.26 
  -8 -11   2   20.12    2.31 
  -8 -11   2   20.40    2.39 
   7 -11  -2   13.30    1.99 
   7 -11  -2   12.42    1.89 
  -7 -11   2   10.90    1.53 
  -7 -11   2   12.60    1.51 
  -7 -11   2   11.27    1.63 
   7 -11  -2   16.12    2.04 
   7 -11  -2   11.68    1.72 
   6 -11  -2    7.99    1.41 
   6 -11  -2    7.33    1.35 
   6 -11  -2    7.07    1.21 
  -6 -11   2    7.50    1.02 
   5 -11  -2   26.78    3.09 
  -5 -11   2   22.46    2.85 
  -5 -11   2   22.21    2.45 
   5 -11  -2   24.48    3.13 
   4 -11  -2   19.03    2.92 
  -4 -11   2   22.00    2.31 
   4 -11  -2   24.15    2.85 
   4 -11  -2   24.50    2.92 
  -4 -11   2   23.13    2.71 
   3 -11  -2    7.74    1.14 
   3 -11  -2    6.24    1.12 
  -3 -11   2    3.85    0.73 
  -3 -11   2    4.86    0.75 
  -3 -11   2    6.51    0.93 
  -3  11   2    4.93    1.08 
   2 -11  -2    4.56    0.94 
  -2 -11   2    3.80    0.69 
  -2  11   2    5.67    0.95 
  -1 -11   2   13.96    1.60 
   1 -11  -2   22.72    2.35 
   1 -11  -2   17.57    2.22 
  -1  11   2   15.76    2.22 
   0 -11  -2   18.25    2.33 
   0 -11  -2   18.81    2.36 
   0 -11  -2   17.33    2.25 
   0 -11   2   18.99    1.76 
   1 -11   2   12.68    1.69 
  -1 -11  -2   13.00    1.72 
  -2 -11  -2    1.70    0.55 
  -2 -11  -2    2.56    0.46 
   2 -11   2    2.23    0.62 
  -2  11  -2    3.45    0.78 
  -3 -11  -2    3.87    0.76 
  -3 -11  -2    4.35    0.65 
   3 -11   2    3.06    0.78 
  -3  11  -2    4.92    0.97 
   4 -11   2    6.95    1.26 
   4 -11   2    4.16    0.99 
  -4 -11  -2    5.83    0.99 
   4 -11   2    6.29    1.07 
  -4 -11  -2    5.09    0.81 
   5 -11   2   21.41    3.01 
  -5 -11  -2   20.68    2.68 
  -5 -11  -2   20.34    2.29 
   5 -11   2   23.42    2.80 
   5 -11   2   23.68    3.05 
  -6 -11  -2   13.87    1.68 
  -6 -11  -2   13.00    1.66 
   6 -11   2   15.79    2.23 
   6 -11   2   14.50    2.05 
   6 -11   2   13.33    2.00 
   6 -11   2   18.03    2.39 
  -6 -11  -2   12.53    1.89 
   6 -11   2   15.83    2.04 
   7 -11   2    9.63    1.46 
  -7 -11  -2    9.32    1.20 
  -7 -11  -2    8.86    1.39 
   7 -11   2    9.44    1.65 
   7 -11   2    7.76    1.21 
  -7 -11  -2   11.91    1.21 
   7 -11   2    4.56    1.40 
   7 -11   2    9.92    1.54 
   8 -11   2    0.67    0.53 
  -8 -11  -2   -0.26    0.35 
  -8 -11  -2    0.20    0.45 
   8 -11   2   -0.09    0.61 
   8 -11   2   -0.81    0.54 
   8 -11   2   -0.36    0.66 
   8 -11   2    1.80    0.92 
  -8 -11  -2   -0.11    0.42 
   9 -11   2    1.81    0.83 
   9 -11   2    2.41    0.73 
  -9 -11  -2    2.75    0.53 
  -9 -11  -2    2.01    0.56 
   9 -11   2    1.92    0.86 
  10 -11   2   -0.82    0.63 
  10 -11   2   -0.09    0.63 
 -10 -11  -2    0.51    0.47 
 -10 -11  -2    0.77    0.34 
 -10  11  -2    0.88    0.51 
 -11 -11  -2    1.11    0.43 
  11 -11   2    0.10    0.61 
  11 -11   2    1.07    0.59 
 -11  11  -2    1.05    0.44 
 -12 -11  -2    2.82    0.46 
 -12  11  -2    2.42    0.45 
 -11 -12   2    0.73    0.26 
 -11 -12   2    1.26    0.41 
  11 -12  -2    0.11    0.37 
 -11 -12   2    1.29    0.37 
  11  12  -2    1.39    0.46 
 -10 -12   2    0.33    0.47 
 -10 -12   2    1.26    0.43 
  10 -12  -2    1.26    0.54 
  10 -12  -2    1.75    0.75 
  10 -12  -2    0.83    0.51 
   9 -12  -2    7.09    1.20 
  -9 -12   2    6.27    1.00 
  -9 -12   2    6.18    0.82 
   9 -12  -2    6.09    1.01 
   9 -12  -2    5.83    1.14 
  -9 -12   2    4.76    0.89 
  -8 -12   2    8.89    1.12 
  -8 -12   2    7.96    1.02 
   8 -12  -2    7.14    1.39 
   8 -12  -2    6.01    1.29 
   8 -12  -2    6.69    1.34 
  -8 -12   2   10.02    1.27 
   8 -12  -2    6.75    1.17 
   7 -12  -2   23.88    3.09 
   7 -12  -2   21.67    2.69 
   7 -12  -2   25.60    2.86 
   7 -12  -2   19.26    2.84 
  -7 -12   2   22.83    2.63 
  -7 -12   2   22.35    2.49 
  -7 -12   2   20.72    2.48 
   6 -12  -2   28.68    3.52 
   6 -12  -2   29.88    3.45 
  -6 -12   2   27.30    3.18 
  -6 -12   2   28.98    3.30 
  -6 -12   2   29.37    3.18 
   6 -12  -2   29.51    3.74 
   6 -12  -2   28.68    3.65 
   5 -12  -2    3.39    0.82 
   5 -12  -2    2.10    0.76 
   5 -12  -2    1.90    0.68 
  -5 -12   2    2.46    0.55 
   4 -12  -2    7.21    1.39 
   4 -12  -2    9.73    1.42 
  -4 -12   2    7.65    1.03 
  -4 -12   2    7.43    1.17 
  -3 -12   2    7.90    1.16 
   3 -12  -2    6.14    1.20 
   3 -12  -2    8.58    1.48 
   3 -12  -2    9.05    1.42 
   2 -12  -2    9.42    1.38 
   2 -12  -2    6.19    1.15 
  -1 -12   2    1.46    0.51 
   1 -12  -2    0.96    0.56 
   1 -12  -2    1.69    0.48 
  -1  12   2    0.96    0.57 
   0 -12  -2    5.47    0.96 
   0 -12  -2    8.04    1.08 
   1 -12   2    4.50    0.89 
  -1 -12  -2    5.97    0.93 
   2 -12   2    2.79    0.71 
  -2 -12  -2    3.36    0.70 
  -2  12  -2    3.62    0.90 
   3 -12   2   10.10    1.40 
   3 -12   2   11.21    1.63 
  -3 -12  -2    6.98    1.26 
  -3 -12  -2    7.16    1.02 
   4 -12   2   -0.21    0.43 
   4 -12   2    1.04    0.58 
  -4 -12  -2    0.37    0.37 
  -4 -12  -2    0.12    0.43 
   4 -12   2    0.66    0.79 
   5 -12   2    6.10    1.32 
   5 -12   2    5.05    1.00 
   5 -12   2    4.26    0.95 
  -5 -12  -2    3.52    0.70 
  -5 -12  -2    4.62    0.91 
   5 -12   2    4.83    1.00 
  -6 -12  -2   18.11    2.29 
   6 -12   2   28.45    2.44 
   6 -12   2   22.82    3.04 
   6 -12   2   18.85    2.65 
  -6 -12  -2   15.66    2.54 
   6 -12   2   21.41    2.62 
  -6 -12  -2   19.06    2.30 
   6 -12   2   23.84    2.99 
  -7 -12  -2    6.78    0.95 
   7 -12   2    4.47    1.22 
  -7 -12  -2    6.41    1.11 
   7 -12   2    7.29    1.19 
  -7 -12  -2    5.45    0.84 
   7 -12   2    5.56    1.25 
   7 -12   2    6.47    1.23 
   7 -12   2    5.93    0.96 
  -8 -12  -2    1.13    0.40 
   8 -12   2    1.72    0.75 
   8 -12   2    0.46    0.54 
   8 -12   2    1.21    0.74 
   8 -12   2    1.99    0.70 
  -8 -12  -2    0.25    0.45 
   8 -12   2    0.29    0.86 
  -9 -12  -2    4.22    0.60 
   9 -12   2    3.36    1.03 
   9 -12   2    4.58    0.83 
   9 -12   2    1.41    0.62 
  -9 -12  -2    3.83    0.68 
  10 -12   2    2.17    0.79 
 -10 -12  -2    3.06    0.61 
 -10 -12  -2    2.21    0.47 
  10 -12   2    2.69    0.79 
 -10  12  -2    4.56    0.66 
  11 -12   2   -0.15    0.54 
 -11 -12  -2    1.03    0.37 
 -11  12  -2    0.33    0.36 
  11 -13  -2    0.13    0.30 
  11  13  -2    0.53    0.37 
 -10 -13   2    0.57    0.27 
 -10 -13   2    0.38    0.35 
 -10 -13   2    0.71    0.42 
  10 -13  -2    0.52    0.46 
  10 -13  -2   -0.34    0.56 
  -9 -13   2    1.73    0.40 
   9 -13  -2    1.05    0.54 
   9 -13  -2    1.37    0.70 
  -9 -13   2    1.57    0.57 
  -9 -13   2    0.98    0.48 
   9 -13  -2    0.34    0.53 
  -8 -13   2   16.04    1.78 
   8 -13  -2    9.99    2.04 
  -8 -13   2   15.93    1.92 
   8 -13  -2   17.12    2.09 
   8 -13  -2   17.00    1.95 
  -8 -13   2   14.86    1.74 
  -7 -13   2    8.97    1.13 
   7 -13  -2    5.86    1.36 
  -7 -13   2    9.07    1.18 
   7 -13  -2    8.52    1.48 
   7 -13  -2    9.53    1.34 
  -7 -13   2   10.22    1.38 
   7 -13  -2    8.42    1.45 
  -6 -13   2    3.09    0.63 
  -6 -13   2    3.10    0.58 
   6 -13  -2    2.64    0.88 
   6 -13  -2    1.89    0.76 
   6 -13  -2    2.36    0.84 
  -6 -13   2    1.40    0.75 
   6 -13  -2    2.96    0.74 
   5 -13  -2    2.11    0.76 
   5 -13  -2    1.32    0.68 
   5 -13  -2    2.15    0.70 
   5 -13  -2    0.14    0.88 
  -5 -13   2    2.55    0.55 
  -4 -13   2    7.59    1.29 
   4 -13  -2   10.05    1.52 
   4 -13  -2    7.80    1.49 
   4 -13  -2    8.63    1.38 
  -4 -13   2    9.94    1.21 
   3 -13  -2    1.61    0.62 
   3 -13  -2    0.72    0.58 
   3 -13  -2    0.95    0.61 
   2 -13  -2    0.78    0.49 
   2 -13  -2    0.86    0.56 
   1 -13  -2    7.43    1.26 
   1 -13  -2    6.75    1.13 
   0 -13  -2    0.42    0.40 
   1 -13   2    9.76    1.52 
  -1 -13  -2    6.05    1.09 
  -2 -13  -2    9.35    1.37 
   2 -13   2    6.41    1.47 
   2 -13   2    9.34    1.39 
  -3 -13  -2    9.48    1.54 
   3 -13   2    9.95    1.63 
   3 -13   2   14.43    1.81 
   3 -13   2   12.41    1.88 
   4 -13   2    0.26    0.46 
   4 -13   2    0.17    0.73 
   4 -13   2    0.45    0.81 
   4 -13   2    0.59    0.59 
  -4 -13  -2    0.23    0.41 
  -4 -13  -2    0.81    0.52 
   5 -13   2    8.49    1.51 
  -5 -13  -2    9.49    1.24 
   5 -13   2   10.54    1.79 
  -5 -13  -2    9.63    1.47 
   5 -13   2    8.84    1.44 
   5 -13   2    9.05    1.58 
  -5 -13  -2    9.92    1.22 
   5 -13   2    8.90    1.29 
   6 -13   2    8.31    1.31 
   6 -13   2    5.72    1.04 
   6 -13   2    7.52    1.25 
   6 -13   2    5.18    1.29 
  -6 -13  -2    6.68    1.16 
  -6 -13  -2    6.92    0.93 
  -6 -13  -2    7.26    1.01 
   6 -13   2    5.69    1.24 
  -7 -13  -2    2.37    0.57 
  -7 -13  -2    1.38    0.57 
  -7 -13  -2    2.33    0.46 
   7 -13   2    1.77    0.61 
   7 -13   2    1.08    0.76 
   7 -13   2    1.56    0.71 
   7 -13   2    0.39    0.84 
   7 -13   2    2.17    0.84 
   8 -13   2    2.14    0.70 
   8 -13   2    1.05    0.57 
   8 -13   2    2.02    0.91 
   8 -13   2    1.17    0.75 
  -8 -13  -2    2.36    0.55 
  -8 -13  -2    2.02    0.48 
  -9 -13  -2    1.41    0.38 
  -9 -13  -2   -0.01    0.40 
   9 -13   2    0.89    0.64 
   9 -13   2    0.41    0.72 
   9 -13   2    1.16    0.55 
  -9  13  -2    0.60    0.53 
  10 -13   2   -0.30    0.45 
  10 -13   2    0.59    0.62 
 -10 -13  -2    0.20    0.26 
  10 -13   2    0.24    0.53 
 -10 -13  -2    0.73    0.40 
 -10  13  -2    0.38    0.40 
 -11 -13  -2    0.05    0.27 
  10 -14  -2    0.91    0.54 
 -10 -14   2    0.77    0.33 
 -10 -14   2    1.05    0.28 
   9 -14  -2    2.05    0.58 
   9 -14  -2    1.44    0.57 
  -9 -14   2    1.79    0.37 
   9 -14  -2    1.58    0.67 
  -9 -14   2    1.13    0.44 
  -8 -14   2    1.48    0.52 
   8 -14  -2    1.85    0.69 
  -8 -14   2    1.21    0.39 
   8 -14  -2    1.09    0.58 
   8 -14  -2    1.16    0.58 
   7 -14  -2   17.81    2.58 
  -7 -14   2   20.90    2.21 
   7 -14  -2   19.76    2.72 
  -7 -14   2   18.88    2.18 
   7 -14  -2   19.37    2.41 
   7 -14  -2   18.88    2.46 
   6 -14  -2   -0.01    0.54 
   6 -14  -2   -0.32    0.75 
  -6 -14   2    0.00    0.46 
   6 -14  -2    0.22    0.60 
  -6 -14   2    0.61    0.39 
   6 -14  -2    0.11    0.51 
   5 -14  -2    8.58    1.40 
   5 -14  -2    7.45    1.34 
   5 -14  -2    6.27    1.21 
  -5 -14   2    8.26    1.06 
   5 -14  -2    7.55    1.37 
   4 -14  -2    1.43    0.94 
   4 -14  -2    2.04    0.70 
  -4 -14   2    1.42    0.52 
   4 -14  -2    1.58    0.71 
   4 -14  -2    1.76    0.65 
   3 -14  -2   11.67    1.83 
  -3 -14   2   13.12    1.54 
   3 -14  -2   13.53    1.78 
   3 -14  -2   10.51    1.85 
   2 -14  -2    1.05    0.67 
   2 -14  -2    0.82    0.48 
   2 -14  -2    0.98    0.58 
   1 -14  -2    3.54    0.75 
  -1 -14  -2    3.42    0.78 
   2 -14   2    2.54    1.02 
   2 -14   2    3.76    0.90 
  -2 -14  -2    3.24    0.77 
   3 -14   2    2.98    0.81 
  -3 -14  -2    3.03    0.63 
   3 -14   2    2.95    1.05 
  -3 -14  -2    2.64    0.61 
  -3 -14  -2    1.78    0.64 
   3 -14   2    2.65    0.94 
  -4 -14  -2   13.92    1.92 
  -4 -14  -2   14.64    1.67 
  -4 -14  -2   13.29    1.63 
   4 -14   2   13.36    1.92 
   4 -14   2   11.67    1.96 
   4 -14   2   16.59    2.35 
  -5 -14  -2    6.75    0.87 
   5 -14   2    4.85    1.16 
   5 -14   2    4.75    1.19 
  -5 -14  -2    6.55    1.09 
   5 -14   2    6.07    1.11 
  -5 -14  -2    5.99    0.91 
   5 -14   2    4.63    1.07 
   6 -14   2    1.48    0.78 
  -6 -14  -2    1.97    0.49 
   6 -14   2    1.74    0.84 
   6 -14   2    2.02    0.86 
   6 -14   2    1.91    0.72 
   6 -14   2    2.34    0.63 
  -6 -14  -2    1.22    0.51 
  -6 -14  -2    2.86    0.70 
   7 -14   2    0.24    0.48 
   7 -14   2    0.39    0.78 
  -7 -14  -2   -0.37    0.39 
   7 -14   2   -0.07    0.66 
   7 -14   2   -0.05    0.60 
   7 -14   2   -0.20    0.53 
  -7 -14  -2   -0.10    0.31 
   8 -14   2    3.54    0.99 
  -8 -14  -2    4.16    0.66 
   8 -14   2    3.13    1.02 
  -8 -14  -2    5.66    0.77 
   8 -14   2    5.75    0.96 
   9 -14   2    3.84    0.89 
   9 -14   2    1.39    0.55 
  -9 -14  -2    1.49    0.46 
  -9 -14  -2    1.64    0.39 
   9 -14   2    1.77    0.63 
  -9  14  -2    1.02    0.54 
 -10 -14  -2    0.47    0.34 
  10 -14   2   -0.51    0.40 
 -10 -14  -2   -0.12    0.22 
  10 -14   2   -0.28    0.56 
  10  15  -2    1.54    0.41 
   9 -15  -2    0.99    0.45 
   9 -15  -2    1.52    0.62 
  -9 -15   2    1.14    0.38 
  -9 -15   2    0.56    0.27 
   8 -15  -2    0.47    0.46 
   8 -15  -2    0.07    0.62 
   8 -15  -2    0.36    0.47 
  -8 -15   2   -0.45    0.39 
  -8 -15   2   -0.67    0.26 
  -7 -15   2   -0.21    0.43 
   7 -15  -2    0.66    0.71 
  -7 -15   2    0.50    0.33 
   7 -15  -2    0.97    0.54 
   7 -15  -2    0.09    0.48 
   6 -15  -2    7.77    1.30 
   6 -15  -2    8.98    1.52 
  -6 -15   2    9.74    1.16 
   6 -15  -2    8.79    1.42 
  -5 -15   2    2.69    0.54 
   5 -15  -2    1.37    0.88 
   5 -15  -2    2.32    0.81 
   5 -15  -2    1.74    0.65 
   5 -15  -2    1.47    0.65 
   4 -15  -2    0.56    0.61 
   4 -15  -2    1.11    0.86 
   4 -15  -2    1.36    0.63 
   4 -15  -2    0.47    0.54 
  -4 -15   2    1.35    0.48 
   3 -15  -2    7.65    1.40 
   3 -15  -2    8.60    1.32 
   3 -15  -2    8.56    1.36 
   2 -15  -2   15.89    2.16 
   2 -15  -2   16.34    2.31 
   1 -15  -2    1.12    0.51 
  -2 -15  -2    2.08    0.67 
   2 -15   2    1.67    0.73 
   2 -15   2    2.51    0.91 
   2 -15   2    2.26    1.04 
  -3 -15  -2   13.08    1.63 
  -3 -15  -2   13.95    1.64 
   3 -15   2   17.00    2.30 
   3 -15   2   13.71    1.97 
  -3 -15  -2   12.96    1.87 
   3 -15   2   11.75    1.88 
   4 -15   2    6.27    1.26 
   4 -15   2    6.83    1.23 
  -4 -15  -2    7.09    0.98 
  -4 -15  -2    8.10    0.98 
   4 -15   2    4.26    1.18 
  -4 -15  -2    6.99    1.19 
  -5 -15  -2   -0.07    0.34 
  -5 -15  -2    0.35    0.50 
   5 -15   2   -0.69    0.70 
   5 -15   2    0.10    0.55 
   5 -15   2   -0.10    0.54 
  -5 -15  -2    0.14    0.43 
  -6 -15  -2    2.42    0.57 
   6 -15   2    2.29    0.82 
   6 -15   2    3.30    0.79 
   6 -15   2    4.03    0.95 
  -6 -15  -2    2.07    0.48 
   6 -15   2    2.31    0.89 
   7 -15   2    0.59    0.80 
   7 -15   2   -0.13    0.62 
   7 -15   2    1.53    0.59 
  -7 -15  -2    0.51    0.33 
  -7 -15  -2   -0.08    0.38 
  -8 -15  -2    4.31    0.61 
   8 -15   2    5.78    1.04 
   8 -15   2    4.09    0.80 
  -8 -15  -2    4.24    0.66 
   8 -15   2    1.51    0.79 
   9 -15   2    3.33    0.65 
  -9 -15  -2    1.91    0.48 
   9 -15   2    4.45    0.84 
  -9 -15  -2    2.82    0.44 
 -10 -15  -2    0.98    0.32 
  10 -15   2    0.32    0.48 
   9 -16  -2    0.73    0.52 
  -9 -16   2    0.58    0.31 
  -9 -16   2    1.16    0.26 
  -8 -16   2    0.23    0.34 
   8 -16  -2    0.17    0.40 
  -8 -16   2    0.65    0.27 
   8 -16  -2    0.14    0.41 
   8 -16  -2   -0.06    0.57 
   7 -16  -2    0.96    0.64 
   7 -16  -2    0.74    0.49 
   7 -16  -2   -0.17    0.46 
  -7 -16   2    0.18    0.30 
   6 -16  -2    1.12    0.72 
   6 -16  -2    1.43    0.55 
  -6 -16   2    0.26    0.34 
   6 -16  -2    0.52    0.52 
   5 -16  -2    3.10    0.79 
  -5 -16   2    4.60    0.67 
   5 -16  -2    3.40    0.87 
   4 -16  -2    3.89    1.00 
   4 -16  -2    3.31    0.85 
   4 -16  -2    5.54    0.96 
  -4 -16   2    4.56    0.70 
   3 -16  -2    2.07    0.73 
   3 -16  -2    2.33    0.70 
   3 -16  -2    1.55    0.61 
   2 -16  -2    2.59    0.67 
   2 -16   2   13.85    1.90 
   2 -16   2   11.86    1.96 
   3 -16   2    2.14    0.71 
  -3 -16  -2    1.72    0.54 
   3 -16   2    1.65    0.76 
  -3 -16  -2    2.09    0.50 
  -3 -16  -2    1.63    0.65 
   3 -16   2    2.62    0.86 
   4 -16   2   21.55    2.33 
  -4 -16  -2   18.29    2.01 
   4 -16   2   18.11    2.38 
   4 -16   2   11.87    2.40 
  -4 -16  -2   19.11    2.05 
  -4 -16  -2   15.33    2.26 
  -5 -16  -2    1.05    0.38 
   5 -16   2    1.19    0.80 
   5 -16   2    0.48    0.66 
   5 -16   2    0.69    0.59 
  -5 -16  -2    1.07    0.46 
   6 -16   2    1.50    0.84 
  -6 -16  -2    0.28    0.39 
   6 -16   2    0.29    0.54 
  -6 -16  -2    0.59    0.35 
   7 -16   2    2.13    0.75 
  -7 -16  -2    2.81    0.54 
  -7 -16  -2    2.99    0.49 
   7 -16   2    1.92    0.64 
   7 -16   2    3.79    0.92 
   8 -16   2    0.79    0.61 
  -8 -16  -2   -0.32    0.30 
   8 -16   2    0.08    0.43 
  -8 -16  -2    0.22    0.25 
   9 -16   2    0.67    0.49 
   9 -16   2    0.18    0.38 
  -9 -16  -2    0.49    0.22 
  -9 -16  -2    0.39    0.31 
   8 -17  -2   -0.12    0.51 
  -8 -17   2    0.56    0.23 
   7 -17  -2    1.92    0.56 
   7 -17  -2    2.26    0.60 
   7 -17  -2    1.82    0.54 
  -7 -17   2    2.49    0.40 
  -6 -17   2    0.09    0.31 
   6 -17  -2    0.42    0.45 
   6 -17  -2    0.45    0.47 
   6 -17  -2    0.18    0.62 
  -5 -17   2    0.42    0.34 
   5 -17  -2   -0.03    0.46 
   5 -17  -2    1.22    0.70 
   5 -17  -2    0.44    0.47 
   4 -17  -2    1.69    0.59 
   4 -17  -2    2.37    0.65 
   3 -17  -2    0.08    0.53 
   3 -17  -2    0.06    0.46 
   3 -17   2    8.21    1.31 
   3 -17   2    5.08    1.31 
   3 -17   2    8.60    1.26 
   4 -17   2    1.21    0.77 
  -4 -17  -2    1.32    0.46 
   4 -17   2    0.57    0.64 
  -4 -17  -2    1.31    0.40 
   4 -17   2    1.15    0.61 
   5 -17   2    1.68    0.63 
   5 -17   2    1.68    0.81 
  -5 -17  -2    1.90    0.50 
  -5 -17  -2    2.29    0.47 
  -6 -17  -2    0.54    0.39 
  -6 -17  -2    0.88    0.33 
   6 -17   2    0.81    0.52 
   6 -17   2    0.78    0.76 
   7 -17   2    0.39    0.44 
   7 -17   2    0.43    0.63 
  -7 -17  -2   -0.05    0.30 
  -7 -17  -2    0.02    0.24 
   8 -17   2    0.62    0.40 
  -8 -17  -2    0.16    0.29 
  -8 -17  -2    0.56    0.22 
   8 -17   2    0.36    0.53 
   7 -18  -2    3.37    0.67 
  -7 -18   2    3.30    0.47 
   6 -18  -2    1.82    0.55 
   6 -18  -2    2.46    0.58 
  -6 -18   2    2.23    0.39 
   5 -18  -2    2.27    0.56 
   5 -18  -2    0.46    0.48 
  -5 -18   2    1.65    0.39 
   4 -18  -2    0.00    0.48 
   4 -18  -2    0.37    0.47 
   3 -18   2   14.34    2.02 
   3 -18   2   15.74    1.99 
   4 -18   2    1.26    0.75 
  -4 -18  -2    0.68    0.35 
   4 -18   2    0.38    0.52 
   5 -18   2    2.46    0.88 
   5 -18   2    2.89    0.71 
  -5 -18  -2    2.97    0.56 
  -5 -18  -2    3.86    0.52 
   6 -18   2    1.12    0.66 
  -6 -18  -2    1.33    0.31 
   6 -18   2    0.54    0.46 
  -6 -18  -2    0.71    0.34 
   7 -18   2    1.30    0.57 
   7 -18   2    0.70    0.44 
  -7 -18  -2    1.39    0.34 
  -7 -18  -2    0.95    0.28 
   5 -19  -2    1.30    0.46 
   4 -19  -2    0.08    0.44 
   4 -19   2   -0.04    0.46 
   4 -19   2   -0.21    0.66 
   5 -19   2    2.44    0.58 
  -5 -19  -2    1.55    0.33 
   5 -19   2    1.34    0.52 
  -6 -19  -2    0.62    0.23 
   6 -19   2    0.70    0.56 
   6 -19   2    0.21    0.38 
 -14   0   3    2.72    0.36 
 -13   0   3    1.30    0.41 
 -13   0   3    0.91    0.30 
  13   0  -3    1.16    0.42 
  12   0  -3   14.11    1.89 
 -12   0   3   15.60    1.78 
 -12   0   3   15.31    1.54 
  11   0  -3   -0.72    0.63 
 -11   0   3    1.12    0.86 
 -11   0   3    0.63    0.46 
 -10   0   3    6.07    0.97 
  10   0  -3    5.96    1.06 
  10   0  -3    6.03    0.87 
 -10   0   3    6.78    1.44 
   9   0  -3    8.69    1.14 
  -9   0   3   10.65    1.80 
   8   0  -3    4.03    0.58 
  -8   0   3    3.76    1.05 
   8   0  -3    2.32    0.65 
  -7   0   3   10.21    1.76 
   7   0  -3   11.06    1.24 
  -6   0   3    1.69    0.78 
  -5   0   3   -0.94    0.31 
  -5   0   3    1.08    0.70 
  -4   0   3   38.23    3.73 
  -4   0   3   24.61    4.69 
   3   0  -3   67.91    7.56 
  -3   0   3   75.26    7.98 
  -2   0   3  460.94   49.15 
   2   0  -3  429.23   46.47 
  -1   0   3  180.56   20.75 
   1   0  -3  194.88   19.62 
   0   0   3  159.62   12.34 
   0   0  -3  148.94   16.16 
  -1   0  -3   42.61    4.24 
   1   0   3   37.85    2.81 
  -2   0  -3   10.39    1.19 
  -3   0  -3   10.57    1.09 
  -3   0  -3   10.11    1.13 
  -3   0  -3    8.87    0.73 
  -4   0  -3   72.81    6.94 
  -4   0  -3   72.51    7.68 
  -5   0  -3    5.80    0.77 
  -5   0  -3    5.22    0.66 
  -6   0  -3   25.95    2.96 
  -6   0  -3   27.74    2.67 
  -7   0  -3    7.39    1.29 
  -7   0  -3    6.09    0.84 
   8   0   3    3.99    1.13 
   8   0   3    3.06    0.67 
   9   0   3   22.22    3.28 
   9   0   3   23.77    2.52 
  10   0   3    0.42    0.92 
 -10   0  -3    0.40    0.52 
  10   0   3    0.68    0.54 
 -11   0  -3    4.38    0.71 
  11   0   3    0.30    0.95 
  11   0   3    0.52    0.51 
 -12   0  -3    6.96    0.83 
 -12   0  -3    6.29    0.96 
 -13   0  -3    1.48    0.33 
  13   0   3    1.42    0.52 
 -13   0  -3    1.01    0.39 
 -14  -1   3    0.29    0.26 
  14  -1  -3    0.37    0.21 
 -14   1   3    0.23    0.26 
 -13  -1   3   -0.30    0.32 
  13  -1  -3   -0.48    0.31 
 -13  -1   3   -0.17    0.22 
 -13   1   3    0.27    0.27 
 -13   1   3    0.39    0.34 
  13   1  -3    0.19    0.50 
  12  -1  -3    0.67    0.46 
 -12  -1   3    0.43    0.42 
 -12  -1   3    0.52    0.33 
 -12   1   3    1.54    0.48 
  12   1  -3    0.76    0.63 
 -11  -1   3    1.32    0.43 
  11  -1  -3    1.30    0.75 
 -11   1   3    2.29    0.58 
  11   1  -3    2.79    0.54 
 -11   1   3    2.90    1.01 
  11   1  -3    1.29    0.69 
  10  -1  -3    3.00    0.80 
 -10  -1   3    1.96    0.93 
 -10  -1   3    2.44    0.57 
  10   1  -3    1.50    0.49 
  10   1  -3    0.98    0.67 
 -10   1   3    0.04    0.51 
 -10   1   3    1.04    0.89 
   9  -1  -3   13.89    1.37 
  -9  -1   3   10.81    2.03 
   9   1  -3   15.22    1.45 
   9   1  -3    8.41    1.56 
  -9   1   3   10.63    2.00 
   8  -1  -3   16.58    1.76 
   8  -1  -3   16.85    2.06 
  -8  -1   3   16.99    2.59 
   8   1  -3   15.48    1.80 
  -8   1   3   15.45    2.55 
   7  -1  -3   16.64    1.79 
  -7  -1   3   18.76    2.67 
   7  -1  -3   17.05    2.08 
   7   1  -3   15.11    1.84 
  -7   1   3   17.70    2.64 
   6  -1  -3   18.02    2.26 
  -6  -1   3   22.04    2.95 
  -6   1   3   17.33    2.82 
   4  -1  -3    2.76    0.48 
  -4  -1   3    2.27    0.35 
  -4  -1   3    2.10    0.68 
  -4  -1   3    2.06    0.41 
   4  -1  -3    2.44    0.48 
  -4   1   3    3.54    0.48 
  -4   1   3    2.74    0.69 
   3  -1  -3   63.54    6.86 
  -3  -1   3   67.83    7.21 
   3   1  -3   60.47    6.81 
  -3   1   3   67.29    7.23 
   2  -1  -3  229.51   26.27 
  -2  -1   3  259.83   27.77 
   2   1  -3  240.59   26.24 
  -2   1   3  274.55   27.78 
   1  -1  -3  324.19   33.95 
   1   1  -3  336.84   33.92 
  -1   1   3  313.74   35.89 
   0  -1  -3   56.72    5.37 
   0  -1   3   52.75    3.54 
   0  -1   3   52.75    4.09 
   0   1   3   45.51    4.06 
   0   1   3   48.42    5.65 
   0   1  -3   49.92    5.34 
   1  -1   3  130.58   10.72 
  -1  -1  -3  126.32   14.04 
  -1   1  -3  135.70   14.02 
   1   1   3  143.97    9.34 
  -1   1  -3  133.05    9.32 
  -2  -1  -3   48.65    3.48 
  -2  -1  -3   56.63    5.26 
  -2   1  -3   49.50    5.24 
   2   1   3   48.69    3.49 
  -2   1  -3   45.82    3.47 
  -3  -1  -3   19.91    1.45 
  -3  -1  -3   22.62    2.00 
  -3  -1  -3   22.10    2.20 
  -3   1  -3   19.49    2.19 
  -3   1  -3   19.72    2.03 
  -3   1  -3   17.56    1.44 
  -4  -1  -3   16.57    1.55 
  -4  -1  -3   15.03    1.71 
  -4   1  -3   14.41    1.13 
  -4   1  -3   15.06    1.71 
  -4   1  -3   14.70    1.56 
  -5  -1  -3   24.47    2.81 
  -5  -1  -3   26.59    2.55 
  -5   1  -3   28.65    2.55 
  -5   1  -3   23.28    2.81 
  -6  -1  -3   28.22    3.34 
  -6  -1  -3   32.58    3.03 
  -6   1  -3   31.04    3.01 
  -7  -1  -3   23.61    2.60 
   7  -1   3   26.86    2.70 
  -7   1  -3   27.55    3.81 
   8  -1   3   13.65    1.66 
   8  -1   3   16.09    2.29 
   8   1   3   13.26    2.18 
   8   1   3   13.88    1.67 
  -8   1  -3   15.10    2.34 
   9  -1   3    0.16    0.46 
   9  -1   3   -0.13    0.85 
   9   1   3    1.02    0.86 
  -9   1  -3   -0.71    0.89 
   9   1   3    0.09    0.51 
  10  -1   3    3.45    0.76 
 -10  -1  -3    4.50    0.82 
  10  -1   3    6.76    1.36 
  10   1   3    6.26    1.31 
  10   1   3    3.29    0.81 
 -10   1  -3    5.35    0.85 
  11  -1   3    2.17    0.48 
  11  -1   3    0.74    0.92 
 -11  -1  -3    1.02    0.41 
 -11  -1  -3    1.09    0.55 
 -11   1  -3    1.37    0.56 
  11   1   3    1.09    0.53 
 -12  -1  -3    1.06    0.36 
 -12  -1  -3    1.08    0.48 
  12  -1   3    1.13    0.59 
  12   1   3    1.02    0.44 
 -12   1  -3    0.65    0.48 
  13  -1   3    3.65    0.64 
 -13  -1  -3    2.93    0.55 
 -13  -1  -3    3.56    0.45 
  13   1   3    2.97    0.65 
 -13   1  -3    3.26    0.47 
 -13   1  -3    2.53    0.55 
 -14  -2   3   -0.13    0.24 
 -13  -2   3    2.31    0.34 
 -13  -2   3    1.16    0.42 
  13  -2  -3    1.58    0.41 
 -13   2   3    1.72    0.44 
 -13   2   3    1.48    0.37 
 -12  -2   3    1.83    0.40 
  12  -2  -3    2.10    0.53 
 -12  -2   3    2.45    0.56 
 -12   2   3    1.99    0.52 
  12   2  -3    2.35    0.67 
  11  -2  -3    0.28    0.51 
 -11  -2   3    0.34    0.45 
 -11  -2   3    0.43    0.35 
  11   2  -3    0.37    0.45 
 -11   2   3    0.04    0.47 
  11   2  -3   -0.17    0.61 
 -11   2   3    0.92    0.86 
 -10  -2   3    7.27    0.91 
 -10  -2   3    7.14    1.56 
  10  -2  -3    6.19    1.19 
 -10  -2   3    7.69    1.09 
 -10   2   3    7.92    1.55 
 -10   2   3    8.88    1.13 
  10   2  -3    7.96    1.03 
  10   2  -3    6.05    1.12 
  -9  -2   3    2.26    0.98 
  -9   2   3    3.21    1.00 
   9   2  -3    2.60    0.63 
   8  -2  -3   19.50    2.05 
  -8  -2   3   20.69    3.07 
  -8   2   3   19.19    3.03 
   7  -2  -3    4.62    0.81 
   7  -2  -3    4.92    0.65 
  -7  -2   3    4.58    1.04 
  -7   2   3    5.00    1.12 
  -6  -2   3   20.84    3.09 
   6  -2  -3   19.84    2.39 
  -6   2   3   19.63    3.03 
   5  -2  -3   26.24    3.20 
  -5  -2   3   29.54    2.72 
  -5  -2   3   20.72    4.08 
  -5   2   3   30.99    3.21 
  -5   2   3   28.56    3.06 
   4  -2  -3   31.97    3.37 
  -4  -2   3   31.99    2.97 
   4  -2  -3   29.87    3.49 
  -4  -2   3   27.41    4.38 
  -4   2   3   28.23    4.41 
  -4   2   3   32.81    3.51 
   3  -2  -3   88.18    9.89 
  -3  -2   3   93.54    8.90 
  -3   2   3   98.91   10.44 
   2  -2  -3   81.71    8.70 
   2   2  -3   83.35    8.63 
  -2   2   3   81.90    9.17 
  -1  -2   3  210.57   16.69 
   1  -2  -3  200.42   21.85 
   1   2  -3  214.59   21.81 
   0  -2  -3  198.03   19.05 
   0  -2   3  190.91   14.55 
   0  -2  -3  159.46   17.20 
   0   2   3  182.47   20.12 
   0   2  -3  187.71   19.01 
   0   2   3  175.53   14.50 
  -1  -2  -3  332.82   35.73 
   1  -2   3  339.92   27.30 
  -1  -2  -3  320.44   32.31 
   1   2   3  348.76   23.78 
   1   2   3  359.25   37.77 
  -1   2  -3  342.71   23.76 
  -1   2  -3  348.66   35.71 
  -2  -2  -3   82.48    8.71 
  -2  -2  -3   82.18    7.87 
  -2   2  -3   81.22    5.77 
   2   2   3   83.69    5.79 
  -2   2  -3   83.94    8.70 
  -3  -2  -3   16.22    1.18 
  -3  -2  -3   20.79    1.82 
   3   2   3   14.53    1.18 
  -3   2  -3   14.53    1.16 
  -3   2  -3   15.37    1.78 
  -4  -2  -3   12.94    1.51 
  -4  -2  -3   16.48    1.70 
  -4   2  -3   14.03    1.10 
  -4   2  -3   15.13    1.55 
  -4   2  -3   15.93    1.70 
  -5  -2  -3    9.47    1.25 
  -5  -2  -3   11.11    1.15 
  -5   2  -3    9.79    1.26 
  -5   2  -3   10.13    1.10 
  -6  -2  -3    5.38    0.70 
  -6   2  -3    5.56    0.67 
  -6   2  -3    4.40    0.75 
  -7  -2  -3   23.55    2.28 
   7  -2   3   21.64    2.33 
  -7   2  -3   23.56    3.30 
  -7   2  -3   20.02    2.51 
   8  -2   3   39.11    3.96 
   8  -2   3   37.84    5.02 
  -8  -2  -3   38.06    3.88 
  -8   2  -3   41.78    5.78 
   9  -2   3    2.32    0.57 
   9  -2   3    2.08    1.03 
   9   2   3    2.25    0.70 
  -9   2  -3    4.54    1.10 
   9   2   3    1.96    0.99 
 -10  -2  -3    0.48    0.56 
  10  -2   3    2.34    1.08 
 -10  -2  -3    1.91    0.47 
  10  -2   3    1.24    0.48 
 -10   2  -3    1.71    1.07 
  10   2   3   -0.50    0.88 
 -10   2  -3    1.48    0.58 
  10   2   3    2.77    0.68 
 -11  -2  -3    5.36    0.73 
  11  -2   3    5.09    0.99 
  11  -2   3    5.07    1.33 
 -11  -2  -3    6.09    0.92 
 -11   2  -3    4.99    0.90 
  11   2   3    6.46    0.94 
 -12  -2  -3    2.40    0.55 
 -12  -2  -3    2.92    0.45 
  12  -2   3    1.78    0.61 
  12  -2   3    1.84    0.88 
  12   2   3    1.59    0.54 
 -12   2  -3    2.08    0.57 
 -13  -2  -3    1.75    0.29 
  13  -2   3    1.95    0.48 
 -13  -2  -3    0.44    0.37 
 -13   2  -3    0.67    0.39 
 -13   2  -3    1.71    0.36 
 -14  -3   3    0.84    0.29 
 -13  -3   3    1.25    0.27 
 -13  -3   3    1.75    0.43 
  13  -3  -3    1.51    0.36 
  13   3  -3    1.99    0.55 
 -13   3   3    1.69    0.43 
 -12  -3   3    0.51    0.28 
  12  -3  -3    0.86    0.41 
 -12  -3   3    0.17    0.40 
  12   3  -3    0.69    0.55 
 -12   3   3    0.56    0.43 
 -11  -3   3    8.48    1.03 
  11  -3  -3    7.89    1.16 
 -11  -3   3   11.49    1.29 
  11   3  -3    9.38    1.17 
 -11   3   3    9.73    1.25 
  11   3  -3    9.32    1.32 
 -11   3   3    9.12    1.73 
  10  -3  -3   15.78    1.66 
 -10  -3   3   14.84    1.42 
 -10  -3   3   14.09    1.72 
  10   3  -3   12.67    1.76 
  10   3  -3   13.70    1.59 
 -10   3   3   12.76    2.29 
  10   3  -3    9.56    1.80 
 -10   3   3   15.46    1.70 
  -9  -3   3    4.46    0.67 
  -9  -3   3    5.30    1.30 
   9  -3  -3    5.42    0.87 
  -9   3   3    3.87    1.18 
  -8  -3   3    9.93    1.74 
  -8   3   3    8.52    1.74 
  -7  -3   3    4.10    0.95 
  -7   3   3    3.03    0.97 
  -6  -3   3   18.80    2.96 
   6  -3  -3   18.19    2.33 
  -6  -3   3   21.57    1.99 
  -6   3   3   26.34    3.24 
  -6   3   3   16.70    2.32 
  -5  -3   3    9.49    1.00 
   5  -3  -3    7.83    1.18 
   5  -3  -3   10.41    1.35 
  -5  -3   3   10.39    1.55 
  -5   3   3    8.16    1.51 
  -5   3   3    8.74    1.20 
  -5   3   3    7.36    1.15 
  -4  -3   3    9.85    1.51 
   4  -3  -3   11.04    1.26 
  -4  -3   3   10.70    1.02 
  -4  -3   3    8.94    0.74 
   4  -3  -3   10.01    1.28 
  -4   3   3    9.58    1.52 
  -4   3   3    6.96    1.19 
  -3  -3   3  100.26    7.59 
   3  -3  -3  110.03   11.49 
  -3  -3   3  113.87   10.34 
  -3   3   3  112.10   12.11 
   2  -3  -3   23.59    2.39 
  -2  -3   3   20.23    1.51 
   2   3  -3   21.37    2.26 
  -2   3   3   21.61    2.46 
  -1  -3   3   27.11    2.18 
   1  -3  -3   21.08    2.53 
   1  -3  -3   24.99    2.88 
  -1   3   3   27.96    3.01 
   1   3  -3   31.47    2.80 
   0  -3  -3  510.22   52.84 
   0  -3   3  514.46   40.37 
   0  -3  -3  498.52   47.77 
   0   3  -3  505.73   52.79 
   0   3   3  500.79   55.86 
  -1  -3  -3  269.42   26.47 
  -1  -3  -3  250.99   23.92 
   1  -3   3  242.97   20.22 
   1   3   3  249.77   17.61 
  -1   3  -3  242.38   26.44 
  -1   3  -3  252.40   17.58 
   1   3   3  263.14   27.95 
  -2  -3  -3   43.25    3.93 
  -2  -3  -3   40.65    4.37 
   2   3   3   38.34    2.89 
  -2   3  -3   41.11    4.36 
  -3  -3  -3   28.09    2.03 
  -3  -3  -3   28.88    3.07 
  -3  -3  -3   26.84    2.75 
  -3   3  -3   29.43    3.08 
  -4  -3  -3   68.73    7.65 
  -4  -3  -3   70.64    7.28 
  -4  -3  -3   74.80    6.57 
  -4   3  -3   63.48    4.82 
  -4   3  -3   64.24    6.57 
  -4   3  -3   69.85    7.29 
  -5  -3  -3   11.99    1.57 
  -5  -3  -3   12.57    1.68 
  -5  -3  -3   12.93    1.42 
  -5   3  -3   14.87    1.61 
  -5   3  -3   14.93    1.43 
  -6  -3  -3    7.59    0.90 
  -6  -3  -3    7.18    1.05 
   6  -3   3    6.47    0.86 
  -6   3  -3    7.37    1.02 
  -7  -3  -3    3.56    0.59 
   7  -3   3    4.03    1.08 
   7  -3   3    3.65    0.59 
  -7   3  -3    2.95    0.65 
   8  -3   3   32.91    4.21 
   8  -3   3   30.45    3.23 
  -8  -3  -3   30.17    3.20 
   8   3   3   29.92    4.22 
  -8   3  -3   38.09    4.88 
   9  -3   3   25.64    3.25 
  -9  -3  -3   19.62    2.13 
   9  -3   3   21.82    2.27 
   9  -3   3   18.59    2.33 
  -9   3  -3   21.35    2.49 
   9   3   3   23.23    3.12 
  -9   3  -3   24.01    3.38 
  10  -3   3    2.24    0.72 
  10  -3   3    1.65    1.06 
 -10  -3  -3    1.66    0.44 
 -10  -3  -3    2.70    0.66 
  10   3   3    2.22    0.69 
 -10   3  -3    0.87    0.59 
 -10   3  -3    2.32    1.15 
  11  -3   3    0.11    0.91 
 -11  -3  -3    0.03    0.45 
 -11  -3  -3    0.11    0.31 
  11  -3   3    0.33    0.55 
 -11   3  -3    0.40    0.49 
  11   3   3   -0.18    0.51 
 -12  -3  -3    1.76    0.50 
  12  -3   3    0.98    0.51 
 -12  -3  -3    1.63    0.35 
  12  -3   3    1.24    0.79 
 -12   3  -3    2.06    0.55 
  12   3   3    2.11    0.55 
  13  -3   3    0.04    0.33 
 -13  -3  -3    0.22    0.34 
 -13  -3  -3    0.19    0.18 
 -13   3  -3    1.09    0.40 
  13  -4  -3    0.29    0.26 
 -13  -4   3    0.80    0.36 
 -13   4   3    1.16    0.37 
  13   4  -3    1.01    0.49 
 -12  -4   3    0.27    0.24 
  12  -4  -3    0.23    0.34 
 -12  -4   3    0.33    0.39 
  12   4  -3    0.64    0.53 
 -12   4   3    0.05    0.39 
 -11  -4   3    0.03    0.42 
  11  -4  -3    0.43    0.42 
 -11  -4   3    0.09    0.27 
  11   4  -3    0.00    0.46 
 -11   4   3   -0.37    0.46 
  11   4  -3   -0.09    0.57 
 -10  -4   3    0.55    0.49 
 -10  -4   3    0.53    0.54 
  10  -4  -3    0.44    0.50 
  10  -4  -3    0.59    0.46 
 -10  -4   3    0.41    0.34 
 -10   4   3    3.00    0.95 
  10   4  -3    0.93    0.64 
 -10   4   3    1.36    0.55 
  -9  -4   3   -0.26    0.46 
   9  -4  -3    0.72    0.76 
  -9  -4   3   -0.19    0.30 
   9  -4  -3   -1.14    0.42 
  -9  -4   3    0.16    0.50 
  -9   4   3    0.91    0.89 
  -8   4   3   23.17    3.54 
  -7  -4   3   14.89    2.30 
  -7   4   3   13.06    2.25 
  -6  -4   3    7.74    1.38 
  -6  -4   3    7.51    0.87 
   6  -4  -3    7.75    1.17 
   6  -4  -3    5.80    1.01 
  -6   4   3    6.47    1.04 
  -6   4   3    7.19    1.31 
  -6   4   3    5.95    1.01 
   5  -4  -3   17.48    2.47 
   5  -4  -3   17.80    2.35 
  -5  -4   3   20.19    1.99 
  -5   4   3   25.92    3.00 
  -5   4   3   19.21    2.36 
   4  -4  -3   40.49    5.16 
   4  -4  -3   45.79    5.43 
  -4  -4   3   49.21    4.43 
   4  -4  -3   46.74    4.99 
  -4   4   3   48.33    6.42 
  -4   4   3   45.08    5.20 
   3  -4  -3   25.16    2.83 
  -3  -4   3   25.41    2.46 
  -3  -4   3   23.73    1.79 
  -3   4   3   26.95    2.92 
   1  -4  -3   10.65    1.12 
   1  -4  -3    9.53    1.36 
  -1   4   3   14.00    1.39 
   0  -4   3   99.46    8.40 
   0  -4  -3   95.22    9.90 
   0  -4  -3   99.95   11.01 
   0   4  -3  108.76   10.96 
   0   4   3  119.28   11.61 
  -1  -4  -3   28.37    2.76 
   1  -4   3   24.96    2.10 
  -1  -4  -3   26.56    2.45 
   1   4   3   24.21    2.84 
  -1   4  -3   22.76    2.71 
   1   4   3   24.62    1.81 
  -2  -4  -3   77.88    7.77 
  -2  -4  -3   85.50    8.63 
   2   4   3   77.51    5.73 
   2   4   3   84.60    9.06 
  -2   4  -3   82.70    8.62 
  -3  -4  -3    8.91    1.21 
  -3  -4  -3    9.66    1.28 
  -3  -4  -3    9.96    1.09 
  -3   4  -3   11.41    1.29 
  -4  -4  -3    7.92    1.10 
  -4  -4  -3    8.85    1.16 
  -4  -4  -3    9.64    1.00 
  -4   4  -3    8.16    1.13 
  -5  -4  -3   86.06    9.80 
  -5  -4  -3   91.03    8.42 
  -5   4  -3   87.72    9.34 
  -5   4  -3   86.91    8.40 
   6  -4   3    4.76    0.66 
  -6  -4  -3    5.06    0.73 
  -6  -4  -3    6.10    0.92 
  -6   4  -3    5.37    0.87 
   7  -4   3    6.60    0.77 
   7  -4   3    9.11    1.41 
  -7  -4  -3    6.16    0.85 
  -7   4  -3    4.31    0.91 
  -8  -4  -3   16.35    1.75 
   8  -4   3   18.50    2.54 
   8  -4   3   13.63    1.68 
   8   4   3   18.42    2.50 
  -8   4  -3   17.11    2.60 
  -9  -4  -3    2.30    0.44 
   9  -4   3    1.89    1.07 
   9  -4   3    1.88    0.66 
  -9   4  -3    1.56    1.13 
  -9   4  -3    1.71    0.68 
  10  -4   3    2.04    0.66 
 -10  -4  -3    1.14    0.36 
 -10  -4  -3    2.62    0.64 
  10  -4   3    0.51    1.01 
 -10   4  -3    2.01    1.09 
 -10   4  -3    0.43    0.55 
 -11  -4  -3    2.00    0.42 
  11  -4   3    1.90    0.91 
  11  -4   3    2.69    0.66 
 -11  -4  -3    2.85    0.62 
 -11   4  -3    2.27    0.63 
  11   4   3    0.99    0.61 
 -12  -4  -3    1.10    0.45 
  12  -4   3    0.63    0.46 
  12  -4   3   -0.30    0.66 
 -12  -4  -3    0.61    0.25 
 -12   4  -3    1.41    0.50 
  12   4   3    0.40    0.49 
  13  -4   3    0.32    0.28 
 -13  -4  -3    0.63    0.34 
 -13   4  -3    0.24    0.34 
 -13  -5   3    3.81    0.62 
  13   5  -3    4.29    0.69 
 -12  -5   3    0.18    0.20 
  12  -5  -3    0.07    0.29 
 -12  -5   3    0.48    0.39 
  12   5  -3    0.61    0.52 
  12   5  -3    0.18    0.40 
 -12   5   3    1.11    0.43 
 -11  -5   3    1.38    0.51 
 -11  -5   3    0.88    0.30 
  11  -5  -3    1.19    0.51 
  11  -5  -3    0.83    0.41 
 -11   5   3    1.01    0.72 
 -11   5   3    1.21    0.53 
  11   5  -3    1.08    0.52 
  11   5  -3    1.45    0.62 
 -10  -5   3    8.61    0.98 
 -10  -5   3    9.22    1.26 
 -10  -5   3    8.83    1.24 
  10  -5  -3    8.44    1.40 
  10  -5  -3    9.25    1.10 
 -10   5   3    8.68    1.71 
 -10   5   3    8.28    1.20 
  -9  -5   3   13.13    1.52 
  -9  -5   3   16.41    1.63 
   9  -5  -3   10.59    1.72 
  -9  -5   3   11.36    1.24 
   9  -5  -3   10.06    1.31 
  -9   5   3    9.02    2.03 
   8  -5  -3    0.25    0.66 
  -8   5   3    0.08    0.84 
  -7  -5   3   17.55    1.94 
   7  -5  -3   20.00    2.60 
  -7   5   3   19.09    2.90 
  -6  -5   3   11.56    1.38 
   6  -5  -3   13.74    1.84 
  -6   5   3   12.08    1.67 
  -6   5   3   13.33    2.05 
  -6   5   3   11.99    1.67 
   5  -5  -3    1.95    0.58 
  -5  -5   3    2.06    0.38 
   5  -5  -3    1.09    0.44 
  -5   5   3    3.28    0.86 
  -5   5   3    1.63    0.47 
   4  -5  -3   13.65    2.00 
  -4  -5   3   17.27    1.68 
   4  -5  -3   15.91    2.11 
   4  -5  -3   17.06    1.98 
  -4   5   3   16.01    2.00 
  -4   5   3   21.19    2.70 
   3  -5  -3    2.07    0.50 
  -3  -5   3    1.19    0.30 
   3  -5  -3    1.28    0.46 
  -3  -5   3    1.75    0.31 
   3  -5  -3    2.17    0.43 
  -3   5   3    2.44    0.46 
  -2  -5   3   77.68    7.12 
  -2  -5   3   80.65    6.04 
   2  -5  -3   67.95    7.93 
  -2   5   3   71.03    8.34 
   1  -5  -3   78.54    8.37 
  -1   5   3   77.40    8.79 
   1   5  -3   80.00    8.27 
   0  -5  -3  100.80   10.60 
   0  -5  -3   93.06    9.51 
   0   5  -3  106.29   10.54 
   0   5   3  101.92   11.15 
  -1  -5  -3   51.04    5.85 
  -1  -5  -3   50.78    5.24 
   1   5   3   58.84    6.13 
  -1   5  -3   58.40    5.84 
  -2  -5  -3   12.06    1.45 
  -2  -5  -3   11.81    1.53 
  -2  -5  -3   12.41    1.28 
   2   5   3   12.30    1.43 
  -2   5  -3   12.27    1.45 
  -3  -5  -3    4.28    0.70 
  -3  -5  -3    4.06    0.72 
  -3  -5  -3    4.78    0.62 
  -3   5  -3    6.63    0.82 
  -4  -5  -3   27.70    3.41 
  -4  -5  -3   29.57    3.24 
  -4  -5  -3   31.05    2.93 
  -4   5  -3   29.80    3.27 
  -5  -5  -3    6.16    0.92 
  -5  -5  -3    5.69    0.76 
  -5   5  -3    5.38    0.90 
  -6  -5  -3    7.03    0.97 
  -6  -5  -3    4.91    0.75 
  -6   5  -3    4.68    0.87 
  -7  -5  -3    0.35    0.34 
  -7  -5  -3    0.56    0.45 
   7  -5   3    0.64    0.76 
  -7   5  -3    0.63    0.46 
  -8  -5  -3    0.52    0.40 
   8  -5   3    2.44    0.92 
   9  -5   3    6.48    1.52 
  -9  -5  -3    7.08    0.83 
   9  -5   3    5.41    0.99 
  -9   5  -3    8.10    1.67 
  -9   5  -3    7.97    1.11 
 -10  -5  -3    0.83    0.33 
  10  -5   3    2.35    0.63 
  10  -5   3    1.29    0.99 
 -10   5  -3    1.09    1.09 
 -10   5  -3    0.58    0.57 
  11  -5   3   12.88    1.96 
 -11  -5  -3   10.24    1.05 
  11  -5   3    9.41    1.25 
 -11   5  -3    9.76    1.34 
  11   5   3    9.72    1.31 
  12  -5   3    0.51    0.70 
  12  -5   3    1.44    0.43 
  12   5   3    1.11    0.51 
 -12   5  -3    0.68    0.45 
 -13   5  -3    1.24    0.39 
 -13  -6   3    0.71    0.33 
  13   6  -3    0.53    0.41 
 -12  -6   3   -0.07    0.38 
  12   6  -3    0.06    0.47 
  11  -6  -3    5.93    0.72 
 -11  -6   3    5.37    0.61 
  11  -6  -3    5.38    1.03 
 -11  -6   3    5.95    0.88 
  11   6  -3    4.73    0.92 
  10  -6  -3    0.55    0.52 
 -10  -6   3    1.16    0.32 
 -10  -6   3    0.84    0.50 
 -10  -6   3    0.86    0.51 
  10  -6  -3    0.46    0.39 
 -10   6   3    2.74    0.97 
  -9  -6   3   26.31    2.41 
   9  -6  -3   25.55    3.11 
  -9  -6   3   22.63    2.82 
   9  -6  -3   24.71    3.36 
  -9  -6   3   27.65    2.85 
   9  -6  -3   23.46    2.46 
  -9   6   3   25.07    3.84 
   8  -6  -3   12.31    1.82 
  -8   6   3   10.84    2.07 
  -7  -6   3   10.73    1.30 
   7  -6  -3   12.35    1.80 
   7  -6  -3   11.27    1.72 
  -7   6   3   10.58    1.89 
  -6  -6   3    3.81    0.61 
   6  -6  -3    5.19    0.94 
  -6   6   3    2.38    0.71 
  -6   6   3    5.72    1.11 
  -6   6   3    4.93    0.89 
   5  -6  -3   11.80    1.64 
  -5  -6   3   11.28    1.22 
  -5   6   3    8.35    1.41 
  -5   6   3   11.53    1.76 
   4  -6  -3   21.49    2.48 
  -4  -6   3   21.83    2.10 
   4  -6  -3   21.70    2.62 
   4  -6  -3   21.01    2.45 
  -4  -6   3   18.17    1.79 
  -4   6   3   20.60    2.49 
   3  -6  -3   11.67    1.52 
   3  -6  -3   12.79    1.62 
  -3  -6   3   10.02    1.05 
   3  -6  -3   11.34    1.41 
  -3  -6   3   10.64    1.17 
  -3   6   3   10.62    1.47 
   2  -6  -3   19.34    2.36 
  -2  -6   3   20.22    2.38 
   2  -6  -3   17.82    2.53 
  -2  -6   3   23.58    2.05 
  -2  -6   3   22.44    1.78 
   2  -6  -3   19.13    2.40 
  -2   6   3   20.76    2.43 
  -1  -6   3   52.71    3.98 
   1  -6  -3   48.85    5.45 
   1  -6  -3   48.15    5.23 
   1   6  -3   47.01    5.11 
  -1   6   3   46.52    5.46 
   0  -6  -3  190.28   18.84 
   0  -6  -3  199.23   22.01 
   0  -6  -3  191.99   20.91 
   0  -6   3  200.98   15.98 
   0   6   3  206.26   22.07 
   0   6  -3  206.29   20.86 
   1  -6   3   37.85    3.28 
  -1  -6  -3   37.75    4.50 
  -1  -6  -3   39.43    3.83 
  -1  -6  -3   38.01    4.30 
   1   6   3   43.19    4.48 
  -1   6  -3   41.25    4.28 
   2  -6   3   26.91    3.04 
  -2  -6  -3   26.68    2.92 
  -2  -6  -3   25.58    2.49 
  -2  -6  -3   23.43    2.78 
   2   6   3   23.96    2.84 
  -2   6  -3   24.60    2.79 
   3  -6   3   18.64    2.16 
  -3  -6  -3   16.25    1.97 
  -3  -6  -3   16.07    2.09 
  -3  -6  -3   17.95    1.78 
  -3   6  -3   16.83    2.00 
  -4  -6  -3   20.68    2.28 
   4  -6   3   23.50    2.78 
  -4  -6  -3   22.90    2.68 
  -4   6  -3   23.48    2.59 
  -5  -6  -3    1.06    0.37 
  -5  -6  -3    1.77    0.48 
  -5   6  -3    2.83    0.58 
  -6  -6  -3   35.96    3.60 
  -6  -6  -3   26.63    3.04 
  -6   6  -3   29.46    3.44 
   7  -6   3    0.71    0.83 
  -7  -6  -3    0.15    0.43 
  -7  -6  -3   -0.32    0.33 
   8  -6   3    4.27    1.19 
  -8  -6  -3    3.80    0.53 
  -8  -6  -3    2.37    0.73 
  -8  -6  -3    4.36    0.71 
   9  -6   3    6.37    0.98 
  -9  -6  -3    5.83    1.03 
   9  -6   3    6.59    1.48 
  -9  -6  -3    6.09    0.78 
  -9   6  -3   13.03    1.76 
 -10  -6  -3    1.42    0.33 
  10  -6   3    2.01    0.59 
 -10  -6  -3    1.50    0.63 
  10  -6   3    0.66    0.83 
 -10   6  -3    3.27    1.20 
 -10   6  -3    3.10    0.69 
  11  -6   3    3.50    0.61 
  11  -6   3    2.15    0.93 
 -11  -6  -3    3.19    0.40 
 -11   6  -3    3.01    0.67 
  12  -6   3    1.57    0.70 
 -12   6  -3    1.32    0.48 
 -13   6  -3    1.09    0.38 
 -13  -7   3    2.61    0.44 
  13   7  -3    1.74    0.48 
 -12  -7   3    1.39    0.45 
 -12   7   3    2.12    0.64 
  12   7  -3    1.18    0.52 
 -11  -7   3    0.63    0.46 
  11  -7  -3    1.03    0.47 
  11   7  -3    1.96    0.61 
 -10  -7   3    1.96    0.58 
  10  -7  -3    1.56    0.75 
  10  -7  -3    1.38    0.37 
  10  -7  -3    0.35    0.56 
 -10  -7   3    0.68    0.49 
 -10   7   3    1.31    0.99 
  -9  -7   3    0.29    0.49 
   9  -7  -3    0.30    0.34 
   9  -7  -3    1.10    0.71 
   9  -7  -3   -0.14    0.80 
  -9  -7   3    1.82    0.47 
  -9  -7   3    0.65    0.28 
  -9  -7   3    0.65    0.55 
  -9   7   3    1.33    1.01 
   8  -7  -3    3.34    0.89 
  -8  -7   3    1.88    0.53 
  -8  -7   3    2.30    0.41 
   8  -7  -3    2.94    0.48 
  -8   7   3    0.88    1.02 
  -7  -7   3    2.55    0.56 
   7  -7  -3    3.85    0.93 
   7  -7  -3    3.60    0.86 
   6  -7  -3   11.50    1.65 
  -6  -7   3    9.62    1.21 
   6  -7  -3   10.00    1.60 
  -6  -7   3   10.56    1.13 
  -6   7   3   10.13    1.55 
  -6   7   3    9.51    1.50 
  -6   7   3   10.55    1.77 
  -5  -7   3    7.47    0.82 
   5  -7  -3    8.43    1.19 
  -5  -7   3    6.51    0.75 
  -5   7   3    3.84    0.95 
  -5   7   3    5.53    0.97 
  -5   7   3    3.97    1.20 
  -4  -7   3   12.71    1.20 
   4  -7  -3   11.11    1.64 
   4  -7  -3   15.36    1.86 
  -4  -7   3   12.37    1.31 
  -4   7   3   10.29    1.61 
   3  -7  -3   82.56    9.03 
   3  -7  -3   82.27    9.88 
   3  -7  -3   87.31    9.41 
  -3  -7   3   88.48    8.07 
  -3  -7   3   83.70    6.85 
  -3  -7   3   85.27    9.39 
  -3   7   3   78.73    9.47 
   2  -7  -3    5.65    0.98 
   2  -7  -3    7.54    0.97 
   2  -7  -3    7.46    1.10 
  -2  -7   3    6.19    0.89 
  -2  -7   3    7.59    0.75 
  -2   7   3    5.42    0.95 
   1  -7  -3   21.68    2.87 
   1  -7  -3   23.12    2.67 
   1  -7  -3   22.50    2.74 
  -1  -7   3   24.07    2.02 
  -1   7   3   26.33    2.76 
   0  -7  -3   30.28    3.81 
   0  -7  -3   29.20    3.07 
   0  -7   3   32.79    2.68 
   0  -7  -3   32.13    3.52 
   0  -7  -3   31.17    3.65 
   0   7   3   32.70    3.64 
   0   7  -3   35.66    3.45 
  -1  -7  -3   58.76    5.72 
  -1  -7  -3   56.79    6.70 
   1  -7   3   62.54    4.90 
  -1  -7  -3   56.83    6.40 
   1   7   3   60.84    6.69 
  -1   7  -3   62.54    6.38 
  -2  -7  -3   54.27    5.96 
   2  -7   3   59.23    6.53 
  -2  -7  -3   52.75    6.25 
  -2  -7  -3   56.72    5.35 
  -2   7  -3   54.10    5.96 
  -3  -7  -3   65.14    7.28 
  -3  -7  -3   69.12    7.66 
   3  -7   3   71.05    8.01 
  -3  -7  -3   67.05    6.56 
  -3   7  -3   68.53    7.31 
  -4  -7  -3   12.04    1.66 
  -4  -7  -3   12.09    1.38 
   4  -7   3   13.32    1.68 
  -4   7  -3   14.19    1.72 
  -5  -7  -3    9.60    1.11 
  -5  -7  -3    9.21    1.29 
  -5   7  -3    7.54    1.25 
  -6  -7  -3    0.08    0.30 
  -6  -7  -3    0.71    0.44 
   6  -7   3    0.85    0.72 
  -6   7  -3    1.45    0.54 
  -7  -7  -3    3.92    0.87 
   7  -7   3    5.98    1.23 
  -7  -7  -3    4.95    0.78 
   7  -7   3    5.08    1.22 
   8  -7   3    5.52    1.04 
   8  -7   3    7.55    1.53 
  -8  -7  -3    7.99    0.79 
  -8  -7  -3    6.92    1.17 
   8  -7   3    6.62    0.94 
  -9  -7  -3    0.30    0.22 
   9  -7   3    0.65    0.90 
   9  -7   3   -0.40    0.44 
  -9  -7  -3    0.27    0.50 
  -9   7  -3    2.14    1.16 
 -10  -7  -3    7.66    1.13 
  10  -7   3    9.06    1.65 
  10  -7   3    7.56    0.97 
 -10   7  -3    7.44    1.15 
 -10   7  -3    7.21    1.71 
  11  -7   3    1.34    0.76 
 -11  -7  -3    1.55    0.55 
 -11   7  -3    1.05    0.52 
  12  -7   3    0.10    0.57 
 -12   7  -3   -0.01    0.39 
 -13   7  -3    1.35    0.37 
 -13  -8   3   -0.17    0.25 
  13   8  -3    0.13    0.34 
 -12  -8   3    0.52    0.37 
  12   8  -3    0.24    0.44 
 -12   8   3   -0.14    0.52 
 -11  -8   3    0.54    0.42 
  11  -8  -3    0.15    0.41 
 -11  -8   3    0.93    0.46 
  11   8  -3   -0.56    0.48 
 -10  -8   3    2.38    0.56 
  10  -8  -3    4.26    0.94 
 -10  -8   3    3.44    0.70 
 -10  -8   3    4.10    0.70 
  10  -8  -3    1.38    0.78 
  -9  -8   3    4.08    0.85 
   9  -8  -3    5.79    1.16 
   9  -8  -3    6.36    0.65 
  -9  -8   3    4.50    0.84 
  -9  -8   3    5.06    0.81 
   9  -8  -3    5.13    1.11 
  -9   8   3    2.63    1.30 
  -8  -8   3    9.30    1.25 
  -8  -8   3    9.45    1.16 
   8  -8  -3    7.74    1.43 
   8  -8  -3    9.44    1.51 
  -8  -8   3    7.53    1.19 
   8  -8  -3    8.46    0.95 
   8  -8  -3    8.06    1.27 
   8  -8  -3    9.22    1.53 
  -8   8   3    8.14    1.63 
   7  -8  -3   17.23    2.28 
  -7  -8   3   17.55    1.84 
  -7   8   3   16.14    2.67 
  -6  -8   3    3.01    0.54 
   6  -8  -3    3.88    0.84 
   6  -8  -3    2.71    0.86 
  -6   8   3    1.22    0.72 
  -6   8   3    2.07    1.02 
  -5  -8   3   33.89    3.38 
   5  -8  -3   34.12    4.18 
  -5  -8   3   33.78    2.92 
  -5   8   3   36.10    4.05 
  -5   8   3   32.29    3.89 
   4  -8  -3   14.90    2.00 
  -4  -8   3   13.55    1.44 
  -4  -8   3   13.53    1.33 
  -4   8   3   12.30    1.81 
   3  -8  -3   22.37    2.82 
  -3  -8   3   25.14    2.86 
   3  -8  -3   25.00    2.88 
  -3  -8   3   24.93    2.44 
  -3  -8   3   25.95    2.12 
   3  -8  -3   23.86    3.04 
  -3   8   3   22.63    2.90 
  -2  -8   3   17.21    1.64 
  -2  -8   3   18.42    2.18 
   2  -8  -3   17.48    2.19 
   2  -8  -3   18.91    2.23 
   2  -8  -3   19.75    2.36 
  -2   8   3   18.56    2.25 
   1  -8  -3   44.22    5.02 
   1  -8  -3   46.24    5.21 
  -1  -8   3   48.78    3.83 
   1  -8  -3   42.23    5.46 
  -1   8   3   48.59    5.25 
   0  -8  -3    1.53    0.47 
   0  -8   3    1.35    0.37 
   0  -8  -3    1.01    0.38 
   0  -8  -3    2.04    0.53 
   0   8   3    1.38    0.38 
   0   8  -3    1.30    0.40 
  -1  -8  -3   35.90    4.34 
  -1  -8  -3   36.39    4.53 
  -1  -8  -3   39.16    3.69 
   1  -8   3   38.08    3.18 
  -1  -8  -3   35.93    4.16 
   1   8   3   40.93    4.32 
  -1   8  -3   38.57    4.13 
   2  -8   3    6.60    0.90 
  -2  -8  -3    5.44    0.83 
  -2  -8  -3    5.55    0.85 
  -2  -8  -3    4.89    0.66 
  -2   8  -3    2.76    0.76 
  -3  -8  -3    3.56    0.71 
   3  -8   3    3.85    0.76 
  -3  -8  -3    5.09    0.66 
  -3   8  -3    4.67    0.82 
   4  -8   3    0.14    0.36 
  -4  -8  -3    0.12    0.28 
  -4  -8  -3    0.60    0.41 
  -4   8  -3   -0.11    0.40 
  -5  -8  -3   19.16    2.11 
  -5  -8  -3   21.63    2.51 
  -5   8  -3   20.38    2.54 
   6  -8   3    1.62    0.83 
   6  -8   3    4.05    0.98 
  -6  -8  -3    2.07    0.60 
  -6  -8  -3    0.84    0.43 
   7  -8   3    2.72    0.97 
   7  -8   3    3.10    1.12 
  -7  -8  -3    2.73    0.60 
  -7  -8  -3    2.26    0.71 
   8  -8   3    2.65    1.01 
  -8  -8  -3    2.63    0.72 
  -8  -8  -3    3.13    0.67 
  -8  -8  -3    2.66    0.57 
   8  -8   3    2.94    0.55 
   8  -8   3    1.97    0.99 
   8  -8   3    2.49    0.68 
  -9  -8  -3   13.74    1.64 
   9  -8   3   15.39    2.22 
   9  -8   3   11.80    1.35 
  -9   8  -3   12.49    2.27 
 -10  -8  -3   -0.80    0.43 
  10  -8   3   -0.10    0.73 
 -10   8  -3    0.27    0.54 
 -11  -8  -3    0.98    0.52 
  11  -8   3    1.11    0.73 
 -11   8  -3    2.16    0.54 
 -12   8  -3    0.36    0.39 
 -13   8  -3    0.97    0.31 
 -12  -9   3    1.01    0.37 
  12   9  -3    0.97    0.44 
 -12   9   3    0.81    0.52 
  11  -9  -3    0.35    0.43 
 -11  -9   3    1.53    0.47 
 -11  -9   3    1.11    0.46 
  11   9  -3    0.74    0.51 
 -10  -9   3    2.96    0.54 
 -10  -9   3    2.42    0.66 
 -10  -9   3    2.93    0.61 
  10  -9  -3    2.84    0.88 
  10  -9  -3    3.74    0.94 
  -9  -9   3    7.86    1.00 
   9  -9  -3    7.02    1.10 
  -9  -9   3    6.12    1.03 
   9  -9  -3    6.36    1.31 
   9  -9  -3    6.27    1.27 
  -9  -9   3    8.12    1.14 
  -9   9   3    6.76    1.61 
   8  -9  -3    9.33    1.49 
   8  -9  -3    8.23    1.25 
   8  -9  -3    9.39    1.53 
  -8  -9   3    6.77    1.17 
  -8  -9   3    8.64    1.24 
   8  -9  -3    8.77    1.50 
  -8  -9   3    8.77    1.11 
  -8   9   3    7.03    1.58 
   7  -9  -3   12.02    1.87 
   7  -9  -3   12.91    1.91 
   7  -9  -3   13.83    1.71 
  -7  -9   3   11.15    1.47 
  -7   9   3   10.86    2.20 
  -6  -9   3    3.44    0.58 
   6  -9  -3    3.01    0.90 
   6  -9  -3    2.23    0.75 
  -5  -9   3    0.03    0.27 
   5  -9  -3    0.87    0.65 
   5  -9  -3   -0.49    0.42 
  -5   9   3    0.30    0.59 
  -4  -9   3    5.15    0.67 
   4  -9  -3    3.89    0.91 
  -4  -9   3    4.94    0.67 
  -4   9   3    3.68    0.82 
  -3  -9   3    3.03    0.57 
  -3  -9   3    3.00    0.52 
   3  -9  -3    2.48    0.70 
   3  -9  -3    3.47    0.77 
  -3   9   3    3.04    0.67 
   2  -9  -3   25.16    3.14 
  -2  -9   3   24.24    2.37 
   2  -9  -3   30.31    3.23 
   2  -9  -3   28.53    3.39 
  -2  -9   3   28.45    3.17 
  -2   9   3   26.42    3.24 
   1  -9  -3   11.42    1.63 
   1  -9  -3   10.11    1.47 
   1  -9  -3    9.24    1.49 
  -1  -9   3   11.14    1.14 
  -1   9   3   13.84    1.50 
   0  -9  -3   23.01    2.72 
   0  -9   3   22.72    2.07 
   0  -9  -3   23.18    2.80 
   0  -9  -3   23.56    2.93 
   0   9   3   25.23    2.80 
  -1  -9  -3   33.45    3.82 
  -1  -9  -3   35.67    3.97 
  -1  -9  -3   33.39    3.35 
  -1   9  -3   34.79    3.77 
  -2  -9  -3    5.28    0.66 
   2  -9   3    5.13    0.83 
  -2  -9  -3    4.49    0.80 
  -2  -9  -3    4.50    0.82 
  -2   9  -3    3.69    0.79 
   3  -9   3    3.28    0.71 
  -3  -9  -3    3.97    0.72 
  -3  -9  -3    2.89    0.53 
  -3   9  -3    3.15    0.74 
  -4  -9  -3   36.94    3.96 
   4  -9   3   42.08    4.84 
  -4  -9  -3   38.81    4.64 
  -4   9  -3   43.94    4.50 
  -5  -9  -3   26.38    2.62 
  -5  -9  -3   30.79    3.10 
   5  -9   3   21.33    3.28 
  -5   9  -3   22.73    2.96 
  -6  -9  -3    8.89    1.23 
   6  -9   3    7.98    1.39 
  -6  -9  -3    5.97    0.97 
   6  -9   3    8.16    1.49 
   7  -9   3    4.13    1.02 
   7  -9   3    2.14    1.03 
  -7  -9  -3    1.34    0.63 
  -7  -9  -3    2.27    0.54 
   7  -9   3    2.76    0.85 
  -8  -9  -3    1.21    0.55 
   8  -9   3    0.26    0.51 
   8  -9   3    0.23    0.86 
   8  -9   3    1.18    0.90 
   8  -9   3    1.61    0.73 
  -8  -9  -3    0.38    0.39 
   8  -9   3    0.17    0.62 
  -8  -9  -3    1.07    0.52 
  -9  -9  -3   -0.20    0.45 
   9  -9   3   -0.05    0.82 
   9  -9   3    0.06    0.74 
  -9   9  -3   -1.11    1.09 
  10  -9   3    1.57    0.84 
 -10  -9  -3    2.01    0.56 
 -10   9  -3    2.56    0.64 
  11  -9   3    1.61    0.72 
 -11  -9  -3    2.19    0.54 
 -11   9  -3    2.08    0.55 
 -12  -9  -3    0.38    0.35 
 -12   9  -3    0.48    0.37 
 -12 -10   3    1.13    0.37 
  12  10  -3    1.70    0.45 
 -12  10   3    1.34    0.52 
  11 -10  -3   -0.15    0.37 
 -11 -10   3   -0.36    0.37 
  11 -10  -3    0.17    0.49 
  11  10  -3   -0.33    0.43 
 -10 -10   3    2.60    0.63 
  10 -10  -3    3.02    0.86 
 -10 -10   3    2.08    0.48 
 -10 -10   3    2.51    0.57 
  10 -10  -3    4.12    0.85 
  -9 -10   3    1.12    0.43 
  -9 -10   3    0.90    0.57 
   9 -10  -3    2.14    0.65 
  -9 -10   3    0.44    0.52 
   9 -10  -3    1.33    0.78 
   9 -10  -3    2.93    0.82 
  -8 -10   3    1.61    0.48 
   8 -10  -3    1.40    0.71 
   8 -10  -3    1.57    0.76 
   8 -10  -3    1.53    0.92 
   8 -10  -3    1.79    0.67 
  -8 -10   3    0.83    0.59 
  -8 -10   3    1.14    0.60 
  -7 -10   3    1.11    0.58 
   7 -10  -3    1.52    0.66 
   7 -10  -3    0.38    0.58 
  -7 -10   3    0.44    0.42 
  -7 -10   3    0.50    0.54 
   7 -10  -3    0.90    0.73 
   7 -10  -3   -0.07    0.82 
   6 -10  -3    1.80    0.76 
   6 -10  -3    2.21    0.84 
   6 -10  -3    3.17    0.73 
  -6 -10   3    3.09    0.60 
  -5 -10   3   42.15    4.45 
   5 -10  -3   46.30    5.59 
   5 -10  -3   47.98    5.52 
   4 -10  -3   16.21    2.58 
   4 -10  -3   21.69    2.66 
  -3 -10   3    4.91    0.83 
  -3 -10   3    5.44    0.76 
   3 -10  -3    6.03    1.06 
   3 -10  -3    5.85    1.04 
  -3  10   3    4.86    0.96 
   2 -10  -3   11.19    1.54 
  -2 -10   3   10.93    1.19 
   2 -10  -3   10.95    1.61 
   2 -10  -3   12.46    1.77 
  -2  10   3   11.80    1.63 
   1 -10  -3    2.80    0.68 
   1 -10  -3    2.89    0.61 
   1 -10  -3    2.31    0.65 
  -1 -10   3    2.31    0.51 
  -1  10   3    2.11    0.57 
   0 -10  -3    0.35    0.44 
   0 -10  -3    0.49    0.35 
   0 -10   3   -0.14    0.36 
   0 -10  -3    1.06    0.47 
   0  10   3    0.92    0.37 
  -1 -10  -3    8.18    1.39 
  -1 -10  -3   11.12    1.47 
  -1  10  -3   11.49    1.42 
  -2 -10  -3    7.17    0.95 
  -2 -10  -3    7.08    1.15 
  -2  10  -3   10.52    1.29 
  -3 -10  -3   39.63    4.10 
  -3 -10  -3   42.05    4.81 
   3 -10   3   44.73    5.01 
  -3  10  -3   39.90    4.62 
   4 -10   3    1.90    0.64 
  -4 -10  -3    1.75    0.57 
  -4 -10  -3    1.21    0.45 
  -4  10  -3    2.54    0.70 
  -5 -10  -3    5.58    1.00 
   5 -10   3    6.68    1.32 
  -5 -10  -3    5.25    0.85 
   5 -10   3    5.71    1.15 
   6 -10   3    4.78    1.06 
   6 -10   3    3.25    0.90 
  -6 -10  -3    3.34    0.70 
  -6 -10  -3    3.84    0.86 
   6 -10   3    6.02    1.25 
  -7 -10  -3   -0.81    0.47 
   7 -10   3    0.10    0.54 
   7 -10   3   -0.17    0.69 
   7 -10   3    0.08    0.86 
   7 -10   3    0.81    0.68 
   7 -10   3    0.08    0.76 
  -7 -10  -3    0.38    0.40 
  -7 -10  -3   -0.38    0.45 
  -8 -10  -3    1.43    0.44 
   8 -10   3    0.83    0.71 
  -8 -10  -3    1.62    0.58 
  -8 -10  -3    1.30    0.51 
   8 -10   3    0.77    0.76 
   8 -10   3    0.99    0.72 
   8 -10   3    0.70    0.52 
   8 -10   3    0.40    0.84 
   9 -10   3    4.73    1.13 
  -9 -10  -3    5.86    0.83 
   9 -10   3    5.02    1.21 
   9 -10   3    5.42    1.01 
  -9 -10  -3    5.86    0.90 
  -9  10  -3    5.87    1.59 
 -10 -10  -3    1.60    0.54 
  10 -10   3    2.15    0.80 
 -10  10  -3    2.20    0.62 
  11 -10   3   -0.52    0.55 
 -11 -10  -3    0.85    0.42 
 -11  10  -3    0.75    0.42 
 -12 -10  -3    0.62    0.33 
 -12  10  -3    1.09    0.37 
 -12 -11   3    0.14    0.26 
 -12  11   3    0.30    0.41 
  12  11  -3    0.12    0.32 
 -11 -11   3    1.73    0.46 
  11 -11  -3    0.68    0.42 
 -11 -11   3    1.90    0.36 
  11  11  -3    2.47    0.55 
  10 -11  -3   -0.03    0.62 
  10 -11  -3   -0.20    0.49 
 -10 -11   3    1.44    0.51 
 -10 -11   3    0.71    0.42 
 -10 -11   3    0.17    0.29 
   9 -11  -3    6.12    1.09 
   9 -11  -3    3.28    0.77 
  -9 -11   3    3.70    0.71 
  -9 -11   3    5.09    0.68 
  -9 -11   3    2.47    0.74 
   9 -11  -3    3.92    0.97 
   8 -11  -3    3.29    0.88 
  -8 -11   3    3.98    0.72 
   8 -11  -3    2.87    0.86 
  -8 -11   3    2.06    0.70 
   8 -11  -3    2.32    0.91 
   8 -11  -3    2.28    0.75 
  -8 -11   3    2.70    0.58 
   7 -11  -3    4.22    1.12 
   7 -11  -3    5.23    1.18 
   7 -11  -3    3.79    1.10 
  -7 -11   3    5.07    1.00 
  -7 -11   3    6.81    0.88 
  -7 -11   3    7.41    0.98 
   7 -11  -3    7.03    1.10 
  -6 -11   3    4.51    0.82 
   6 -11  -3    2.54    0.75 
   6 -11  -3    1.99    0.79 
  -6 -11   3    3.06    0.67 
  -6 -11   3    2.14    0.54 
   6 -11  -3    3.39    0.90 
   6 -11  -3    4.49    1.06 
   5 -11  -3    2.18    0.78 
   5 -11  -3    3.02    0.81 
   5 -11  -3    3.29    0.75 
   4 -11  -3   10.98    1.79 
   4 -11  -3   12.98    1.90 
   3 -11  -3   31.66    4.27 
   3 -11  -3   37.49    4.27 
   2 -11  -3   14.25    1.96 
   2 -11  -3   13.74    2.00 
   2 -11  -3   15.61    1.97 
  -2 -11   3   11.75    1.39 
  -2  11   3   12.76    1.87 
   1 -11  -3    6.19    1.23 
   1 -11  -3    8.50    1.21 
   1 -11  -3    9.62    1.40 
  -1 -11   3    8.74    1.01 
  -1  11   3    7.86    1.27 
   0 -11  -3    4.27    0.82 
   0 -11   3    4.18    0.70 
   0 -11  -3    6.21    1.01 
   0 -11  -3    4.48    0.91 
  -1 -11  -3    4.74    0.93 
  -1 -11  -3    4.19    0.79 
  -2 -11  -3   15.95    1.91 
  -2 -11  -3   13.05    1.55 
  -2  11  -3   15.50    1.95 
  -3 -11  -3    9.46    1.17 
   3 -11   3   13.34    1.81 
  -3 -11  -3    9.17    1.37 
  -3  11  -3    7.48    1.37 
  -4 -11  -3    8.62    1.17 
   4 -11   3    9.37    1.64 
  -4 -11  -3    9.44    1.43 
   5 -11   3    8.67    1.53 
   5 -11   3   12.29    1.76 
  -5 -11  -3   10.04    1.39 
  -5 -11  -3    8.14    1.13 
   5 -11   3    6.88    1.35 
   6 -11   3    8.09    1.52 
   6 -11   3    5.32    1.12 
  -6 -11  -3    6.37    0.88 
   6 -11   3    6.83    1.23 
   6 -11   3    4.58    0.96 
  -6 -11  -3    5.58    0.90 
   6 -11   3    5.93    1.24 
   7 -11   3   13.93    2.09 
   7 -11   3   13.15    1.62 
  -7 -11  -3   13.08    1.79 
   7 -11   3   15.58    2.26 
  -7 -11  -3   11.49    1.55 
  -7 -11  -3   11.99    1.51 
   7 -11   3   12.63    1.86 
   7 -11   3   11.03    1.79 
   8 -11   3    1.08    0.79 
  -8 -11  -3    1.67    0.64 
   8 -11   3    2.70    0.94 
  -8 -11  -3    3.57    0.66 
  -8 -11  -3    4.08    0.62 
   8 -11   3    1.63    0.87 
   8 -11   3    3.14    0.79 
   8 -11   3    2.41    0.64 
   9 -11   3    0.89    0.73 
  -9 -11  -3    0.40    0.44 
   9 -11   3    2.14    0.69 
   9 -11   3    0.69    0.80 
  -9 -11  -3    0.96    0.40 
  10 -11   3    1.32    0.74 
 -10 -11  -3    1.74    0.42 
 -10 -11  -3    1.20    0.50 
  10 -11   3    1.02    0.71 
 -10  11  -3    2.41    0.59 
 -11 -11  -3    1.39    0.43 
 -11  11  -3    1.06    0.43 
  11 -12  -3    0.52    0.34 
 -11 -12   3    0.05    0.21 
 -11 -12   3    0.39    0.34 
  11  12  -3    0.22    0.37 
 -10 -12   3    1.11    0.31 
 -10 -12   3    0.20    0.41 
 -10 -12   3    0.29    0.37 
  10 -12  -3    0.43    0.46 
  10 -12  -3   -0.01    0.45 
  -9 -12   3    3.44    0.58 
   9 -12  -3    2.36    0.73 
   9 -12  -3    4.04    0.88 
  -9 -12   3    3.82    0.76 
   9 -12  -3    5.01    0.98 
  -9 -12   3    3.64    0.66 
   8 -12  -3    5.64    0.99 
   8 -12  -3    6.17    1.19 
  -8 -12   3    5.38    0.81 
  -8 -12   3    5.89    0.92 
  -8 -12   3    5.61    0.99 
   8 -12  -3    6.43    1.20 
   8 -12  -3    5.40    1.11 
   7 -12  -3    0.22    0.62 
   7 -12  -3    0.16    0.57 
  -7 -12   3   -0.38    0.50 
  -7 -12   3    0.49    0.37 
  -7 -12   3    0.00    0.56 
   7 -12  -3    0.22    0.61 
   7 -12  -3   -0.19    0.74 
  -6 -12   3    2.07    0.73 
  -6 -12   3    2.66    0.64 
  -6 -12   3    2.58    0.54 
   6 -12  -3    0.94    0.85 
   6 -12  -3    1.03    0.64 
   6 -12  -3    3.59    0.88 
   6 -12  -3    2.55    0.81 
   5 -12  -3    0.88    0.65 
   5 -12  -3    0.45    0.54 
  -5 -12   3    0.09    0.59 
   5 -12  -3    0.00    0.56 
   5 -12  -3    1.40    0.73 
  -5 -12   3    0.84    0.42 
   4 -12  -3   14.88    2.38 
   4 -12  -3   16.83    2.35 
   4 -12  -3   18.28    2.24 
   3 -12  -3    2.52    0.72 
   3 -12  -3    3.58    0.86 
   2 -12  -3    1.11    0.53 
   2 -12  -3    0.78    0.55 
   1 -12  -3   13.98    1.97 
   1 -12  -3   18.08    2.00 
   1 -12  -3   13.82    2.06 
   1 -12  -3   11.36    1.92 
   0 -12  -3    0.82    0.63 
   0 -12  -3    0.86    0.41 
   0 -12  -3    1.71    0.55 
  -1 -12  -3    7.93    1.21 
  -1 -12  -3    7.94    1.19 
  -2 -12  -3    2.95    0.73 
   2 -12   3    4.60    1.08 
   3 -12   3    6.52    1.36 
  -3 -12  -3    6.25    0.90 
  -3 -12  -3    7.88    1.19 
   4 -12   3   11.61    1.74 
  -4 -12  -3    9.45    1.17 
   4 -12   3    6.66    1.34 
  -4 -12  -3    8.33    1.38 
  -5 -12  -3    3.69    0.84 
   5 -12   3    4.64    1.06 
  -5 -12  -3    3.50    0.70 
   5 -12   3    4.83    1.23 
  -5 -12  -3    4.64    0.70 
   5 -12   3    3.08    0.89 
   5 -12   3    4.67    1.02 
   5 -12   3    3.42    0.83 
   6 -12   3    4.10    0.87 
  -6 -12  -3    5.04    0.99 
  -6 -12  -3    5.09    0.77 
   6 -12   3    2.97    1.04 
   6 -12   3    4.35    1.03 
   6 -12   3    6.00    1.40 
  -6 -12  -3    5.43    0.84 
   6 -12   3    5.57    1.20 
   7 -12   3    0.90    0.81 
   7 -12   3    0.93    0.69 
  -7 -12  -3    1.10    0.42 
  -7 -12  -3    1.50    0.54 
   7 -12   3    1.72    0.87 
  -7 -12  -3    1.50    0.58 
   7 -12   3    1.53    0.76 
   7 -12   3    0.76    0.55 
  -8 -12  -3    0.28    0.42 
   8 -12   3    0.17    0.82 
   8 -12   3    0.34    0.64 
   8 -12   3    0.21    0.58 
   8 -12   3    0.02    0.70 
  -8 -12  -3    0.69    0.36 
   8 -12   3    0.37    0.48 
   9 -12   3   -0.66    0.49 
  -9 -12  -3    0.62    0.36 
   9 -12   3    1.67    0.76 
  -9 -12  -3    0.93    0.43 
   9 -12   3    0.22    0.66 
  10 -12   3   -0.05    0.58 
 -10 -12  -3    1.11    0.44 
  10 -12   3    0.17    0.61 
 -10 -12  -3   -0.10    0.28 
 -10  12  -3    0.43    0.46 
 -11 -12  -3    0.07    0.31 
 -11  12  -3    0.57    0.37 
  11  13  -3    7.32    0.93 
 -10 -13   3    0.43    0.38 
 -10 -13   3    0.41    0.35 
 -10 -13   3    0.85    0.28 
  10 -13  -3   -0.04    0.39 
   9 -13  -3    3.99    0.91 
   9 -13  -3    3.99    0.79 
  -9 -13   3    3.42    0.73 
  -9 -13   3    4.44    0.68 
   9 -13  -3    4.35    0.86 
  -9 -13   3    4.32    0.62 
  -8 -13   3    0.72    0.49 
   8 -13  -3   -0.69    0.59 
  -8 -13   3    0.05    0.53 
   8 -13  -3    0.68    0.51 
   8 -13  -3    0.30    0.50 
  -8 -13   3    1.05    0.37 
   7 -13  -3    0.22    0.72 
  -7 -13   3    0.24    0.51 
   7 -13  -3    0.43    0.56 
   7 -13  -3    0.14    0.56 
  -7 -13   3    0.23    0.60 
   7 -13  -3    0.57    0.62 
  -6 -13   3    1.94    0.49 
   6 -13  -3    2.55    0.80 
   6 -13  -3    2.58    0.83 
  -6 -13   3    1.74    0.70 
   6 -13  -3    2.34    0.73 
   6 -13  -3    1.78    0.74 
  -5 -13   3    1.24    0.66 
   5 -13  -3    1.37    0.91 
   5 -13  -3    1.18    0.70 
  -5 -13   3    1.15    0.45 
   5 -13  -3    1.76    0.63 
   5 -13  -3    1.70    0.68 
   4 -13  -3    1.20    0.64 
   4 -13  -3    1.08    0.90 
  -4 -13   3    0.79    0.62 
   4 -13  -3    0.88    0.60 
   4 -13  -3    1.08    0.64 
  -4 -13   3    0.75    0.43 
   3 -13  -3   20.80    2.73 
   3 -13  -3   18.69    2.36 
   3 -13  -3   17.64    2.50 
   2 -13  -3    8.96    1.30 
   2 -13  -3    6.18    1.29 
   1 -13  -3    2.32    0.61 
   1 -13  -3    2.70    0.74 
   0 -13  -3    3.89    0.78 
   0 -13  -3    3.80    0.74 
   1 -13   3   12.35    1.72 
  -1 -13  -3    7.76    1.30 
  -1 -13  -3    9.66    1.37 
  -2 -13  -3    5.79    1.10 
   2 -13   3    7.83    1.41 
   3 -13   3    7.28    1.37 
   3 -13   3   10.34    1.68 
  -3 -13  -3    8.31    1.35 
   4 -13   3    2.14    0.88 
   4 -13   3    0.95    0.63 
   4 -13   3    2.64    0.97 
  -4 -13  -3    1.44    0.49 
   4 -13   3    2.44    0.76 
  -4 -13  -3    1.51    0.60 
  -4 -13  -3    1.33    0.52 
  -5 -13  -3    0.83    0.44 
  -5 -13  -3    0.29    0.51 
   5 -13   3    1.28    0.89 
   5 -13   3    0.63    0.67 
  -5 -13  -3    1.13    0.50 
   5 -13   3    0.18    0.79 
   5 -13   3    1.33    0.64 
   6 -13   3    8.05    1.21 
   6 -13   3    7.86    1.37 
  -6 -13  -3    8.84    1.36 
   6 -13   3    9.82    1.52 
   6 -13   3    6.28    1.33 
   6 -13   3   10.90    1.81 
  -6 -13  -3    7.53    1.07 
  -6 -13  -3   10.31    1.20 
   7 -13   3    1.11    0.82 
   7 -13   3    2.38    0.67 
  -7 -13  -3    2.59    0.51 
  -7 -13  -3    3.84    0.64 
   7 -13   3    3.86    0.89 
   7 -13   3    1.79    0.84 
  -7 -13  -3    1.37    0.61 
   7 -13   3    1.75    0.89 
   8 -13   3    0.78    0.67 
  -8 -13  -3    0.14    0.32 
   8 -13   3    0.30    0.50 
   8 -13   3   -0.53    0.66 
  -8 -13  -3    0.32    0.43 
   8 -13   3    1.40    0.63 
   8 -13   3    0.95    0.85 
   9 -13   3    5.00    1.09 
   9 -13   3    4.88    0.88 
  -9 -13  -3    3.46    0.68 
  -9 -13  -3    4.06    0.64 
 -10 -13  -3    1.18    0.32 
  10 -13   3    1.12    0.62 
 -10 -13  -3    1.34    0.44 
 -10  13  -3    1.00    0.45 
 -11 -13  -3    1.03    0.31 
 -10 -14   3    1.21    0.38 
  10 -14  -3    0.25    0.21 
 -10 -14   3    1.83    0.28 
  10  14  -3    0.74    0.41 
  -9 -14   3    1.35    0.34 
   9 -14  -3    1.57    0.69 
  -9 -14   3    1.02    0.48 
   9 -14  -3    0.94    0.50 
  -9 -14   3    1.04    0.39 
  -8 -14   3    3.31    0.57 
   8 -14  -3    2.05    0.65 
  -8 -14   3    2.71    0.66 
   8 -14  -3    2.46    0.69 
  -8 -14   3    2.50    0.48 
   8 -14  -3    2.36    0.83 
  -7 -14   3    1.84    0.57 
  -7 -14   3    1.25    0.44 
   7 -14  -3    1.39    0.60 
   7 -14  -3    1.68    0.77 
  -7 -14   3    0.48    0.58 
   7 -14  -3    2.20    0.66 
   6 -14  -3    8.09    1.37 
   6 -14  -3    8.11    1.34 
  -6 -14   3    8.11    1.25 
   6 -14  -3    9.38    1.32 
   6 -14  -3    6.87    1.37 
  -6 -14   3    9.43    1.14 
   5 -14  -3   13.18    1.73 
   5 -14  -3   11.16    1.73 
   5 -14  -3   11.70    1.82 
   5 -14  -3   12.44    1.90 
  -5 -14   3   11.38    1.59 
  -5 -14   3   11.40    1.44 
   4 -14  -3   10.68    1.67 
  -4 -14   3   10.50    1.49 
   4 -14  -3    9.42    1.54 
  -4 -14   3   13.37    1.41 
   4 -14  -3    9.66    1.72 
   3 -14  -3   24.46    3.28 
   3 -14  -3   28.23    3.13 
   3 -14  -3   24.16    3.29 
  -3 -14   3   26.26    2.96 
   2 -14  -3    7.80    1.35 
   2 -14  -3    8.51    1.49 
   2 -14  -3   10.70    1.43 
  -2 -14   3    9.28    1.31 
   1 -14  -3   17.14    2.27 
   0 -14  -3    1.83    0.55 
  -1 -14  -3    2.76    0.71 
   1 -14   3    1.77    0.93 
   2 -14   3    7.90    1.22 
  -2 -14  -3    7.92    1.15 
   2 -14   3    8.57    1.40 
   2 -14   3    9.54    1.63 
   2 -14   3    9.14    1.50 
  -2 -14  -3   11.80    1.22 
  -2 -14  -3    6.47    1.26 
   3 -14   3    2.51    0.99 
  -3 -14  -3    1.43    0.55 
   3 -14   3    0.99    0.63 
   3 -14   3    1.52    0.74 
  -3 -14  -3    1.39    0.59 
  -3 -14  -3    1.79    0.54 
   3 -14   3    2.39    0.92 
   4 -14   3    2.63    1.09 
  -4 -14  -3    3.39    0.84 
  -4 -14  -3    6.38    0.77 
  -4 -14  -3    3.87    0.74 
   4 -14   3    3.92    0.93 
   4 -14   3    3.05    0.83 
   4 -14   3    5.26    1.11 
  -5 -14  -3    6.10    0.90 
   5 -14   3    7.01    1.29 
  -5 -14  -3    3.02    0.92 
   5 -14   3    7.76    1.53 
   5 -14   3    5.84    0.98 
   5 -14   3    5.78    1.13 
  -5 -14  -3    6.31    0.86 
   6 -14   3    3.39    0.94 
   6 -14   3    3.99    0.78 
  -6 -14  -3    3.36    0.63 
   6 -14   3    2.06    0.86 
   6 -14   3    2.21    0.80 
  -6 -14  -3    2.02    0.70 
  -6 -14  -3    3.50    0.58 
   6 -14   3    2.14    0.85 
  -7 -14  -3    0.24    0.41 
   7 -14   3    0.31    0.59 
   7 -14   3   -0.52    0.51 
   7 -14   3    0.24    0.77 
   7 -14   3    0.01    0.58 
  -7 -14  -3   -0.16    0.31 
   7 -14   3   -0.14    0.74 
   8 -14   3    0.31    0.78 
   8 -14   3    0.74    0.69 
  -8 -14  -3    1.56    0.47 
  -8 -14  -3    1.45    0.38 
   8 -14   3    0.84    0.50 
   8 -14   3    1.66    0.62 
   9 -14   3    5.61    0.98 
  -9 -14  -3    2.98    0.53 
   9 -14   3    2.10    0.70 
   9 -14   3    1.98    0.60 
  -9 -14  -3    1.91    0.42 
  -9  14  -3    2.07    0.57 
  10 -14   3    0.80    0.60 
 -10 -14  -3    1.32    0.29 
 -10 -14  -3    1.22    0.40 
 -10  14  -3    1.55    0.40 
  10 -15  -3    0.18    0.28 
  -9 -15   3    0.76    0.36 
  -9 -15   3    1.33    0.29 
  -8 -15   3    0.22    0.28 
   8 -15  -3    0.05    0.63 
  -8 -15   3    0.23    0.39 
  -8 -15   3   -0.46    0.42 
   8 -15  -3    0.80    0.48 
   8 -15  -3   -0.13    0.41 
   7 -15  -3    7.73    1.06 
  -7 -15   3    5.30    0.95 
   7 -15  -3    6.41    1.06 
  -7 -15   3    5.58    0.82 
  -6 -15   3    3.59    0.61 
   6 -15  -3    4.20    0.79 
  -6 -15   3    4.45    0.81 
   6 -15  -3    2.35    0.79 
   6 -15  -3    2.05    0.69 
  -5 -15   3    8.01    1.28 
  -5 -15   3    9.72    1.17 
   5 -15  -3    7.15    1.35 
   5 -15  -3    8.82    1.41 
   5 -15  -3   12.57    1.49 
   5 -15  -3    9.58    1.58 
   4 -15  -3    7.28    1.49 
   4 -15  -3    6.91    1.36 
   4 -15  -3   12.40    1.47 
  -4 -15   3   10.32    1.19 
  -4 -15   3    9.13    1.33 
  -3 -15   3    8.88    1.36 
   3 -15  -3   10.69    1.48 
   3 -15  -3   10.68    1.54 
   3 -15  -3    8.99    1.58 
  -2 -15   3    3.18    0.76 
   2 -15  -3    2.91    0.82 
   2 -15  -3    2.87    0.72 
  -1 -15   3    3.00    0.75 
   1 -15  -3    3.33    0.75 
   0 -15  -3    3.65    0.76 
   0 -15   3    4.22    0.82 
  -1 -15  -3   12.31    1.49 
   1 -15   3   10.29    1.51 
   1 -15   3   13.06    1.79 
   2 -15   3    1.09    0.72 
  -2 -15  -3    0.86    0.57 
   2 -15   3    1.42    0.83 
   2 -15   3    1.10    0.90 
   2 -15   3    0.62    0.61 
  -2 -15  -3    1.18    0.53 
   3 -15   3   15.04    2.23 
   3 -15   3   19.64    2.39 
  -3 -15  -3   14.98    2.17 
  -3 -15  -3   16.69    1.93 
   3 -15   3   21.24    2.70 
  -3 -15  -3   16.17    1.93 
   3 -15   3   16.76    2.03 
   4 -15   3    0.56    0.68 
  -4 -15  -3    1.94    0.64 
   4 -15   3    1.49    0.95 
  -4 -15  -3    0.92    0.42 
   4 -15   3    0.94    0.80 
  -4 -15  -3    1.10    0.48 
   4 -15   3    0.54    0.64 
   5 -15   3    3.85    0.92 
   5 -15   3    4.36    0.82 
   5 -15   3    1.67    0.83 
  -5 -15  -3    3.58    0.84 
   5 -15   3    3.97    0.98 
  -5 -15  -3    3.31    0.58 
   6 -15   3    8.20    1.35 
   6 -15   3    3.53    1.21 
  -6 -15  -3    8.82    1.04 
   6 -15   3    7.72    1.08 
   6 -15   3    8.62    1.28 
  -6 -15  -3    6.36    0.92 
  -7 -15  -3    1.49    0.40 
   7 -15   3    2.48    0.58 
   7 -15   3    1.54    0.84 
   7 -15   3    1.30    0.72 
   7 -15   3    2.37    0.68 
  -7 -15  -3    1.79    0.50 
   7 -15   3    0.90    0.70 
  -8 -15  -3    1.06    0.34 
   8 -15   3    0.56    0.49 
  -8 -15  -3    0.88    0.38 
   8 -15   3   -0.10    0.69 
   8 -15   3    0.91    0.62 
  -9 -15  -3    4.35    0.60 
   9 -15   3    3.30    0.74 
  -9 -15  -3    5.12    0.69 
   9 -15   3    5.83    0.97 
  -9  15  -3    4.64    0.71 
 -10 -15  -3    0.64    0.28 
  -9 -16   3    1.57    0.25 
   9 -16  -3    0.07    0.17 
  -8 -16   3    0.76    0.27 
   8 -16  -3    0.40    0.59 
  -7 -16   3    2.76    0.50 
   7 -16  -3    3.53    0.77 
   7 -16  -3    4.05    0.74 
   6 -16  -3    5.13    0.93 
   6 -16  -3    4.04    0.90 
  -6 -16   3    6.14    0.77 
  -5 -16   3    7.25    0.99 
   5 -16  -3    7.59    1.20 
   5 -16  -3    8.46    1.21 
   4 -16  -3    7.10    1.35 
  -4 -16   3    7.28    0.96 
   4 -16  -3    7.09    1.15 
   3 -16  -3    1.85    0.73 
   3 -16  -3    1.10    0.58 
   3 -16  -3    1.20    0.63 
   2 -16  -3    1.28    0.56 
   1 -16  -3    2.68    0.61 
   2 -16   3    4.14    1.08 
   2 -16   3    6.16    1.33 
   2 -16   3    4.04    0.97 
  -2 -16  -3    4.61    0.78 
  -3 -16  -3    0.97    0.49 
   3 -16   3    1.60    0.98 
   3 -16   3    1.09    0.73 
   3 -16   3    0.62    0.79 
  -3 -16  -3    2.16    0.48 
  -3 -16  -3    1.15    0.60 
  -4 -16  -3    2.36    0.51 
   4 -16   3    3.68    0.87 
   4 -16   3    1.79    0.79 
   4 -16   3    2.13    0.87 
  -4 -16  -3    2.77    0.58 
  -5 -16  -3    7.46    1.07 
  -5 -16  -3    9.43    1.17 
   5 -16   3    9.94    1.42 
   5 -16   3    7.90    1.57 
   5 -16   3   10.12    1.48 
   6 -16   3   12.24    1.54 
   6 -16   3    9.20    1.35 
   6 -16   3    7.53    1.53 
  -6 -16  -3    8.27    1.09 
   6 -16   3    7.75    1.12 
  -6 -16  -3    7.46    1.03 
   7 -16   3    1.26    0.59 
  -7 -16  -3    1.15    0.36 
  -7 -16  -3    1.23    0.41 
   7 -16   3    2.48    0.85 
  -8 -16  -3   -0.41    0.29 
   8 -16   3    0.29    0.43 
  -8 -16  -3   -0.07    0.24 
   8 -16   3    0.41    0.62 
  -9 -16  -3    0.16    0.20 
  -9 -16  -3   -0.04    0.28 
   9 -16   3    0.12    0.44 
   8 -17  -3    0.02    0.34 
  -8 -17   3    0.66    0.23 
  -7 -17   3    2.11    0.39 
   7 -17  -3    1.64    0.59 
  -6 -17   3    0.73    0.31 
   6 -17  -3    0.95    0.61 
   6 -17  -3    0.90    0.48 
   6 -17  -3    0.39    0.43 
   5 -17  -3    1.45    0.60 
  -5 -17   3    3.38    0.51 
   5 -17  -3    3.88    0.73 
   4 -17  -3   14.17    1.88 
   3 -17  -3    3.30    0.79 
   2 -17  -3    1.83    0.59 
  -2 -17  -3    6.65    0.91 
   2 -17   3    8.12    1.27 
   2 -17   3    4.02    1.15 
  -3 -17  -3   10.58    1.26 
   3 -17   3   11.02    1.59 
   3 -17   3    7.31    1.63 
  -3 -17  -3   11.55    1.33 
   3 -17   3   10.44    1.63 
   4 -17   3    1.93    0.81 
   4 -17   3    3.15    0.77 
   4 -17   3    0.97    0.72 
  -4 -17  -3    2.77    0.48 
  -4 -17  -3    2.85    0.56 
   5 -17   3    3.61    1.13 
   5 -17   3    6.80    1.20 
   5 -17   3    6.60    1.06 
  -5 -17  -3    6.36    0.86 
  -5 -17  -3    5.84    0.79 
  -6 -17  -3    2.85    0.50 
   6 -17   3    3.35    0.75 
  -6 -17  -3    3.32    0.57 
   6 -17   3    3.18    0.91 
  -7 -17  -3    0.78    0.35 
   7 -17   3    1.20    0.49 
   7 -17   3    1.26    0.67 
  -7 -17  -3    0.90    0.30 
   8 -17   3    1.52    0.48 
  -8 -17  -3    1.38    0.35 
  -8 -17  -3    1.85    0.33 
   8 -17   3    1.27    0.58 
  -7 -18   3    2.40    0.29 
   7 -18  -3    0.16    0.19 
  -6 -18   3    0.06    0.26 
   5 -18  -3    1.09    0.54 
  -5 -18   3    2.68    0.42 
   5 -18  -3    2.83    0.60 
   4 -18  -3    0.88    0.52 
   4 -18  -3    0.76    0.48 
   3 -18  -3    0.71    0.50 
   2 -18   3    3.45    0.91 
   3 -18   3    1.09    0.73 
  -3 -18  -3    1.88    0.49 
   3 -18   3    1.64    0.66 
   3 -18   3    1.71    0.76 
   4 -18   3    0.37    0.53 
   4 -18   3    0.85    0.68 
  -4 -18  -3    1.13    0.36 
  -4 -18  -3    0.74    0.39 
   4 -18   3    1.09    0.73 
   5 -18   3    1.57    0.55 
  -5 -18  -3    1.26    0.40 
  -5 -18  -3    1.46    0.37 
   5 -18   3    0.98    0.73 
   6 -18   3    1.41    0.52 
   6 -18   3    1.80    0.71 
  -6 -18  -3    1.34    0.34 
  -6 -18  -3    1.66    0.39 
   7 -18   3    0.93    0.57 
  -7 -18  -3    0.27    0.22 
   7 -18   3   -0.26    0.34 
  -7 -18  -3    0.18    0.27 
   3 -19   3    5.35    1.03 
   4 -19   3    2.18    0.77 
   4 -19   3    2.22    0.62 
   5 -19   3   -0.03    0.41 
   5 -19   3    1.61    0.63 
  -5 -19  -3    0.18    0.29 
  -5 -19  -3    0.75    0.27 
   6 -19   3    1.80    0.53 
   4 -20   3    1.47    0.57 
 -13   0   4    2.92    0.43 
  13   0  -4    3.54    0.53 
 -13   0   4    2.42    0.50 
  13   0  -4    2.59    0.63 
 -12   0   4    5.25    0.66 
 -12   0   4    4.60    0.75 
  12   0  -4    3.86    0.86 
  11   0  -4    7.53    1.20 
 -11   0   4    8.26    1.11 
 -11   0   4    7.50    1.59 
 -10   0   4   10.82    2.02 
  10   0  -4    9.30    1.49 
 -10   0   4   13.35    1.49 
   9   0  -4    4.25    0.68 
   9   0  -4    3.87    0.79 
  -9   0   4    4.58    1.22 
   8   0  -4    0.28    0.38 
  -8   0   4   -0.23    0.81 
   8   0  -4   -0.45    0.38 
  -7   0   4   12.28    1.93 
   7   0  -4   12.01    1.31 
   7   0  -4    9.95    1.51 
  -6   0   4    0.67    0.65 
   6   0  -4    0.71    0.40 
  -5   0   4    2.46    0.76 
   5   0  -4    2.18    0.46 
  -5   0   4    0.24    0.38 
  -4   0   4   34.20    4.71 
   4   0  -4   30.01    3.75 
  -4   0   4   35.01    3.75 
   3   0  -4   11.37    1.55 
   3   0  -4   12.53    1.48 
  -3   0   4   14.20    1.53 
  -2   0   4    1.07    0.27 
   2   0  -4    0.63    0.27 
   1   0  -4   14.18    1.59 
  -1   0   4   14.00    1.66 
   0   0   4  324.17   26.75 
   0   0  -4  355.80   35.04 
   0   0   4  327.08   23.31 
  -1   0  -4  262.53   26.14 
   1   0   4  248.42   17.38 
   1   0   4  239.24   19.95 
  -2   0  -4   31.17    2.28 
  -2   0  -4   33.36    3.46 
  -3   0  -4  114.68   11.10 
  -3   0  -4  120.78   12.25 
  -3   0  -4  114.15    8.14 
  -4   0  -4   17.55    2.11 
  -4   0  -4   20.67    1.94 
  -5   0  -4   63.12    7.28 
  -5   0  -4   74.14    6.59 
  -6   0  -4    5.00    0.70 
  -6   0  -4    5.58    0.82 
  -7   0  -4    2.62    0.64 
  -7   0  -4    3.78    0.59 
   7   0   4    4.89    1.17 
   8   0   4   13.13    2.10 
   8   0   4   12.22    1.53 
   9   0   4    3.88    1.31 
   9   0   4    4.52    0.82 
  10   0   4    0.11    0.50 
  10   0   4   -0.50    0.87 
 -10   0  -4    0.11    0.50 
 -11   0  -4    5.71    0.89 
  11   0   4    5.89    1.39 
  11   0   4    4.83    0.80 
  12   0   4   14.84    2.34 
 -12   0  -4   16.50    1.86 
 -12   0  -4   15.77    1.60 
 -13   0  -4   -0.22    0.22 
  13   0   4   -0.18    0.40 
 -13   0  -4    0.15    0.34 
 -13  -1   4    1.27    0.31 
  13  -1  -4    1.37    0.39 
 -13  -1   4    1.19    0.40 
  13   1  -4    1.29    0.51 
 -13   1   4    1.41    0.34 
 -13   1   4    1.28    0.41 
  13   1  -4    2.39    0.46 
  12  -1  -4    0.92    0.46 
  12  -1  -4    1.61    0.64 
 -12  -1   4    0.36    0.30 
 -12  -1   4    1.45    0.47 
 -12   1   4    1.16    0.45 
  12   1  -4    0.94    0.60 
 -11  -1   4    8.10    1.16 
  11  -1  -4    6.54    1.21 
 -11  -1   4    9.27    1.01 
 -11   1   4    9.22    1.15 
  11   1  -4    7.16    1.20 
 -11   1   4    8.94    1.66 
  10  -1  -4    6.91    1.14 
 -10  -1   4    7.29    1.54 
 -10  -1   4    6.40    1.02 
 -10   1   4    8.44    1.05 
  10   1  -4    6.18    1.08 
  10   1  -4    7.00    0.93 
 -10   1   4    5.40    1.47 
  -9  -1   4    1.45    0.55 
  -9  -1   4    1.92    0.91 
  -9   1   4    1.06    0.89 
   9   1  -4    1.96    0.68 
   9   1  -4    0.79    0.45 
   9   1  -4    1.38    0.63 
  -8  -1   4    2.26    0.92 
   8  -1  -4    2.70    0.48 
   8  -1  -4    2.15    0.65 
   8   1  -4    2.02    0.61 
  -8   1   4    1.61    0.89 
   8   1  -4    1.21    0.46 
   7  -1  -4    2.23    0.46 
  -7  -1   4    2.44    0.82 
   7  -1  -4    3.27    0.62 
  -7   1   4    2.70    0.87 
   7   1  -4    1.78    0.51 
   6  -1  -4   15.78    2.04 
  -6  -1   4   19.44    2.64 
   6  -1  -4   14.23    1.74 
  -6   1   4   20.35    2.65 
   5  -1  -4   27.63    3.26 
  -5  -1   4   31.58    4.13 
  -5   1   4   29.67    4.24 
  -5   1   4   25.82    3.24 
   4  -1  -4   47.81    4.86 
  -4  -1   4   43.37    6.31 
   4  -1  -4   46.45    5.08 
  -4  -1   4   50.18    5.08 
  -4   1   4   38.24    6.31 
  -4   1   4   42.92    5.08 
   3  -1  -4   96.49   10.98 
  -3  -1   4  108.03   11.01 
   3  -1  -4   96.36   10.44 
  -3   1   4  101.30   11.01 
   3   1  -4   92.66   10.39 
   2  -1  -4   31.67    3.63 
   2   1  -4   33.45    3.59 
  -2   1   4   35.54    3.81 
  -1  -1   4    8.42    0.79 
   1  -1  -4    7.33    1.08 
  -1   1   4    9.92    1.10 
   1   1  -4    9.90    1.05 
   0  -1   4   64.40    4.65 
   0  -1   4   64.20    5.37 
   0  -1  -4   64.40    7.05 
   0   1  -4   74.30    7.04 
   0   1   4   67.05    7.43 
   0   1   4   66.75    5.35 
   1  -1   4   23.37    1.84 
  -1  -1  -4   24.58    2.44 
   1   1   4   20.54    1.58 
  -1   1  -4   21.04    2.40 
  -2  -1  -4   16.79    2.29 
  -2  -1  -4   28.58    2.55 
  -2   1  -4   22.49    1.65 
   2   1   4   23.71    1.67 
  -2   1  -4   24.61    2.52 
  -3  -1  -4   11.92    0.97 
  -3  -1  -4   13.75    1.49 
  -3  -1  -4   13.85    1.38 
  -3   1  -4   14.59    1.48 
  -3   1  -4   11.54    0.95 
  -4  -1  -4    4.98    0.72 
  -4  -1  -4    4.17    0.62 
  -4   1  -4    6.09    0.70 
  -4   1  -4    4.81    0.70 
  -5  -1  -4   28.09    2.71 
  -5  -1  -4   26.20    3.00 
  -5   1  -4   29.83    2.72 
  -5   1  -4   25.02    2.99 
  -6  -1  -4   12.09    1.63 
  -6  -1  -4   16.67    1.46 
  -6   1  -4   10.61    1.59 
  -6   1  -4   14.32    1.44 
  -7  -1  -4   29.09    3.00 
   7  -1   4   27.82    3.97 
  -7   1  -4   30.87    3.00 
   7   1   4   32.07    4.05 
   8  -1   4    2.25    1.12 
   8  -1   4    3.21    0.67 
   8   1   4    1.30    1.12 
   9  -1   4    8.74    1.18 
   9  -1   4    8.22    1.76 
   9   1   4   10.01    1.26 
   9   1   4    8.87    1.77 
  -9   1  -4    8.46    1.22 
  10  -1   4    1.08    0.52 
  10  -1   4    1.32    1.04 
 -10  -1  -4    1.47    0.59 
  10   1   4    0.97    0.96 
  10   1   4    1.45    0.60 
 -10   1  -4    0.59    0.55 
  11  -1   4    2.55    1.19 
 -11  -1  -4    4.93    0.85 
  11  -1   4    6.09    0.72 
 -11  -1  -4    5.18    0.70 
  11   1   4    4.29    1.24 
 -11   1  -4    4.49    0.82 
  11   1   4    4.53    0.82 
  12  -1   4   -0.39    0.70 
 -12  -1  -4    0.49    0.31 
 -12  -1  -4    0.05    0.43 
  12  -1   4   -0.21    0.52 
  12   1   4    0.75    0.39 
 -12   1  -4   -0.10    0.45 
 -13  -1  -4    1.93    0.45 
  13  -1   4    1.57    0.50 
 -13  -1  -4    1.82    0.33 
 -13   1  -4    1.92    0.46 
 -13   1  -4    2.68    0.39 
  13   1   4    2.34    0.57 
 -13  -2   4    1.08    0.26 
  13  -2  -4    0.06    0.29 
 -13  -2   4    0.49    0.34 
  13   2  -4    0.72    0.48 
 -13   2   4    0.51    0.30 
 -13   2   4    0.03    0.32 
 -12  -2   4   -0.39    0.25 
  12  -2  -4    0.16    0.37 
 -12  -2   4    0.28    0.40 
  12  -2  -4   -0.14    0.58 
 -12   2   4    0.88    0.44 
  12   2  -4    0.10    0.53 
  11  -2  -4    6.25    0.96 
 -11  -2   4    6.11    1.00 
  11  -2  -4    8.56    1.17 
 -11  -2   4    7.13    0.85 
 -11   2   4    6.35    0.98 
  11   2  -4    7.44    1.12 
 -10  -2   4    3.48    0.72 
  10  -2  -4    3.05    0.85 
 -10  -2   4    2.98    0.58 
  10   2  -4    2.96    0.81 
 -10   2   4    4.80    1.19 
  10   2  -4    2.00    0.81 
 -10   2   4    4.51    0.75 
  10   2  -4    4.15    0.68 
  -9  -2   4    4.75    1.29 
  -9  -2   4    3.81    0.68 
   9  -2  -4    4.89    0.95 
  -9  -2   4    4.63    0.86 
   9   2  -4    3.79    0.94 
   9   2  -4    6.16    0.80 
   9   2  -4    5.78    0.93 
  -9   2   4    5.08    1.31 
  -8  -2   4    4.06    1.07 
   8  -2  -4    2.42    0.65 
  -8   2   4    4.07    1.00 
   8   2  -4    2.87    0.66 
   7  -2  -4    9.61    1.55 
  -7  -2   4   11.53    2.01 
  -7   2   4   16.72    2.11 
   6  -2  -4    1.90    0.53 
  -6  -2   4    3.14    0.79 
  -6   2   4    4.62    0.93 
   5  -2  -4   19.16    2.39 
  -5  -2   4   21.26    2.96 
   5  -2  -4   15.80    2.25 
  -5   2   4   20.76    2.29 
  -5   2   4   19.55    2.86 
   4  -2  -4   90.29    9.13 
  -4  -2   4   80.76   11.81 
   4  -2  -4   89.54    9.58 
   4  -2  -4   82.73   10.01 
  -4   2   4   86.78    9.60 
   3  -2  -4   25.60    3.20 
   3  -2  -4   28.78    3.08 
  -3   2   4   29.68    3.22 
   2  -2  -4  196.67   21.50 
  -2   2   4  218.89   22.71 
   2   2  -4  199.56   21.44 
   1  -2  -4   11.58    1.16 
  -1  -2   4    9.64    0.83 
   1   2  -4    7.65    1.04 
   0  -2   4   36.70    2.87 
   0  -2  -4   35.44    3.79 
   0   2  -4   34.84    3.74 
   0   2   4   35.31    2.82 
   0   2   4   33.23    3.95 
   1  -2   4   44.81    3.46 
  -1  -2  -4   42.80    4.55 
  -1  -2  -4   43.12    4.10 
  -1   2  -4   40.05    4.50 
   1   2   4   41.83    3.00 
  -2  -2  -4   13.22    1.37 
  -2  -2  -4   10.78    1.21 
   2   2   4   11.31    0.87 
  -2   2  -4   10.91    0.83 
  -2   2  -4   11.47    1.30 
  -3  -2  -4   17.32    1.62 
  -3  -2  -4   16.67    1.42 
  -3   2  -4   12.35    1.55 
  -3   2  -4   11.19    1.00 
  -4  -2  -4   42.29    4.09 
  -4  -2  -4   41.62    4.54 
  -4   2  -4   40.58    4.13 
  -4   2  -4   43.94    4.53 
  -5  -2  -4    3.80    0.55 
  -5  -2  -4    3.56    0.64 
  -5   2  -4    3.53    0.61 
  -5   2  -4    3.95    0.58 
  -6  -2  -4   14.85    1.61 
  -6  -2  -4   15.24    1.80 
  -6   2  -4   14.28    1.77 
  -6   2  -4   16.04    1.60 
   7  -2   4   13.82    2.07 
  -7  -2  -4   12.48    1.41 
   7  -2   4   13.42    1.46 
   7   2   4   14.49    2.11 
  -7   2  -4    9.68    1.55 
   8  -2   4    7.61    1.61 
   8  -2   4    8.59    1.04 
  -8  -2  -4    6.93    1.02 
  -8   2  -4    5.68    1.47 
   8   2   4   11.46    1.69 
   9  -2   4    5.24    0.82 
   9  -2   4    6.64    1.47 
  -9  -2  -4    6.61    0.79 
   9   2   4    4.62    1.26 
   9   2   4    4.18    0.90 
  -9   2  -4    5.10    0.92 
  10  -2   4    0.01    0.94 
 -10  -2  -4    0.40    0.38 
 -10  -2  -4    0.65    0.55 
  10  -2   4    0.17    0.40 
 -10   2  -4    0.63    0.53 
  10   2   4    0.15    0.56 
  10   2   4   -0.67    0.86 
  11  -2   4    2.91    1.13 
  11  -2   4    3.09    0.77 
 -11  -2  -4    1.63    0.59 
 -11  -2  -4    2.33    0.47 
  11   2   4    1.91    1.06 
  11   2   4    2.18    0.63 
 -11   2  -4    2.09    0.62 
 -12  -2  -4    0.64    0.29 
 -12  -2  -4   -0.09    0.39 
  12  -2   4   -0.22    0.68 
  12  -2   4    0.18    0.48 
  12   2   4    0.31    0.43 
 -12   2  -4   -0.06    0.41 
 -13  -2  -4    1.14    0.24 
  13  -2   4    0.70    0.40 
 -13  -2  -4    1.40    0.37 
 -13   2  -4    0.84    0.39 
 -13   2  -4    1.42    0.34 
  13  -3  -4    1.50    0.33 
 -13  -3   4    1.51    0.25 
 -13  -3   4    0.95    0.38 
  13   3  -4    1.28    0.50 
 -13   3   4    0.85    0.37 
 -12  -3   4   -0.31    0.37 
 -12  -3   4    0.34    0.26 
  12  -3  -4    0.09    0.34 
  12   3  -4   -0.41    0.52 
 -12   3   4    0.22    0.41 
  11  -3  -4    2.50    0.56 
 -11  -3   4    1.70    0.55 
  11  -3  -4    1.73    0.72 
 -11  -3   4    1.77    0.40 
  11   3  -4    2.71    0.69 
  11   3  -4    1.28    0.50 
 -11   3   4    1.06    0.51 
  10  -3  -4    3.79    0.91 
 -10  -3   4    4.06    0.73 
  10  -3  -4    4.99    0.77 
 -10  -3   4    4.20    0.58 
 -10   3   4    3.42    0.74 
  10   3  -4    3.94    0.69 
  10   3  -4    3.50    0.79 
 -10   3   4    1.88    0.82 
  10   3  -4    2.02    0.83 
 -10   3   4    3.52    1.12 
   9  -3  -4    3.36    0.76 
   9  -3  -4    3.48    0.92 
  -9  -3   4    3.06    0.78 
  -9  -3   4    4.68    0.66 
  -9  -3   4    5.04    0.85 
   9  -3  -4    3.28    0.93 
  -9   3   4    5.44    1.23 
   9   3  -4    5.76    0.92 
   9   3  -4    4.88    0.78 
  -8  -3   4    9.36    1.80 
  -8   3   4   10.16    1.76 
  -7  -3   4    1.73    0.83 
   7  -3  -4    1.10    0.48 
  -7   3   4    2.64    0.87 
   6  -3  -4   12.75    1.76 
  -6  -3   4   14.47    2.24 
  -6   3   4   15.42    2.22 
  -6   3   4   12.35    1.75 
   5  -3  -4   13.15    1.78 
  -5  -3   4   13.20    2.09 
   5  -3  -4   13.53    1.68 
  -5   3   4   10.53    1.66 
  -5   3   4   22.36    2.55 
   4  -3  -4    9.99    1.55 
   4  -3  -4   12.18    1.60 
   4  -3  -4   12.00    1.64 
  -4   3   4   15.67    1.61 
   3  -3  -4   15.58    1.74 
   3  -3  -4   15.81    1.76 
  -3   3   4   12.62    1.73 
   2  -3  -4   74.64    7.88 
  -2  -3   4   80.06    6.00 
  -2  -3   4   67.52    5.16 
   2   3  -4   76.10    7.78 
  -2   3   4   75.28    8.28 
  -1  -3   4    6.45    0.63 
   1  -3  -4    6.89    0.69 
   1  -3  -4    6.90    0.88 
   1   3  -4    6.28    0.74 
  -1   3   4    4.56    0.80 
   0  -3  -4  209.30   19.92 
   0  -3  -4  207.75   22.07 
   0  -3   4  205.59   16.85 
   0   3  -4  217.72   22.01 
   0   3   4  211.56   23.29 
  -1  -3  -4   14.31    1.60 
   1  -3   4   13.54    1.19 
  -1  -3  -4   14.28    1.40 
  -1   3  -4   14.59    1.53 
   1   3   4   13.11    1.02 
   1   3   4   12.44    1.59 
  -2  -3  -4   16.85    1.93 
  -2  -3  -4   18.05    1.71 
  -2   3  -4   16.50    1.88 
  -2   3  -4   16.34    1.21 
   2   3   4   17.48    1.26 
  -3  -3  -4   90.17   10.02 
  -3  -3  -4   95.10    9.04 
  -3   3  -4   93.56    6.63 
  -3   3  -4  100.65   10.01 
  -4  -3  -4   14.97    1.64 
  -4  -3  -4   13.19    1.71 
  -4  -3  -4   14.12    1.44 
  -4   3  -4   12.86    1.60 
  -5  -3  -4   25.54    3.06 
  -5  -3  -4   27.48    2.75 
  -5  -3  -4   26.30    3.21 
  -5   3  -4   31.81    2.80 
  -5   3  -4   27.66    3.06 
  -6  -3  -4    5.06    0.74 
   6  -3   4    5.20    0.74 
  -6   3  -4    5.18    0.85 
  -6   3  -4    6.81    0.77 
   7  -3   4    8.93    1.05 
  -7  -3  -4    9.17    1.08 
   7  -3   4   11.21    1.73 
  -7   3  -4    6.38    1.16 
   8  -3   4    0.29    0.89 
   8  -3   4    1.08    0.42 
  -8  -3  -4    0.58    0.39 
   8   3   4    1.00    0.98 
  -8   3  -4    0.29    0.93 
   9  -3   4   15.38    1.71 
   9  -3   4   21.78    2.72 
   9  -3   4   16.32    1.87 
  -9  -3  -4   14.45    1.58 
   9   3   4   13.77    2.37 
  -9   3  -4   15.44    2.60 
  -9   3  -4   17.10    1.95 
   9   3   4   13.60    1.82 
  10  -3   4    1.44    0.65 
 -10  -3  -4    1.82    0.43 
  10  -3   4    3.06    1.22 
  10   3   4    1.84    0.97 
 -10   3  -4    1.19    0.58 
  10   3   4    1.65    0.69 
  11  -3   4   13.07    2.11 
 -11  -3  -4   11.38    1.23 
  11  -3   4   10.32    1.45 
 -11   3  -4   13.79    1.56 
  11   3   4   11.15    1.45 
 -12  -3  -4    4.27    0.48 
  12  -3   4    1.24    0.82 
  12  -3   4    2.44    0.63 
 -12   3  -4    3.34    0.64 
  12   3   4    2.57    0.61 
 -13  -3  -4    4.43    0.48 
  13  -3   4    6.12    0.66 
 -13   3  -4    3.66    0.65 
  13  -4  -4    2.69    0.38 
 -13  -4   4    2.26    0.47 
  13   4  -4    2.10    0.54 
 -12  -4   4    1.88    0.32 
  12  -4  -4    1.19    0.38 
 -12  -4   4    1.31    0.47 
  12   4  -4    0.83    0.53 
 -11  -4   4    2.68    0.45 
  11  -4  -4    3.49    0.59 
 -11  -4   4    2.35    0.61 
  11   4  -4    1.64    0.66 
  11   4  -4    2.99    0.62 
 -11   4   4    2.64    0.81 
 -10  -4   4    4.24    0.82 
  10  -4  -4    3.18    0.98 
 -10  -4   4    5.78    0.67 
  10  -4  -4    6.22    0.81 
  10  -4  -4    4.78    0.96 
  10   4  -4    5.33    0.94 
 -10   4   4    4.12    1.01 
 -10   4   4    5.15    1.28 
  10   4  -4    3.29    0.95 
  10   4  -4    4.38    0.79 
   9  -4  -4   17.80    2.25 
   9  -4  -4   15.98    2.34 
  -9  -4   4   18.65    2.16 
  -9  -4   4   19.66    2.15 
   9  -4  -4   19.26    1.99 
  -9  -4   4   17.51    1.83 
  -9   4   4   19.36    2.92 
   9   4  -4   18.06    2.16 
  -8   4   4   22.28    3.42 
  -7   4   4   21.85    3.32 
   6  -4  -4   11.04    1.23 
   6  -4  -4    4.78    0.85 
  -6   4   4    3.29    0.79 
  -6   4   4    4.69    1.12 
   5  -4  -4   19.02    2.37 
   5  -4  -4   19.24    2.49 
  -5   4   4   28.88    3.25 
  -5   4   4   16.83    2.35 
   4  -4  -4   67.23    7.01 
   4  -4  -4   62.75    7.30 
   4  -4  -4   65.45    7.66 
  -4   4   4   63.99    7.33 
  -4   4   4   66.72    9.02 
   3  -4  -4   81.34    9.80 
   3  -4  -4   81.49    9.35 
   3  -4  -4   87.89    8.96 
  -3   4   4   86.08    9.40 
   2  -4  -4    7.88    1.08 
   2  -4  -4    8.61    1.16 
  -2  -4   4    8.56    0.79 
   2  -4  -4    8.66    1.08 
  -2   4   4    6.11    1.02 
   1  -4  -4  136.80   12.91 
   1  -4  -4  128.79   14.37 
  -1  -4   4  136.73   10.96 
  -1   4   4  140.35   15.15 
   1   4  -4  138.30   14.28 
   0  -4  -4  129.07   12.20 
   0  -4  -4  126.92   13.56 
   0  -4   4  125.77   10.34 
   0   4  -4  129.12   13.49 
   0   4   4  131.84   14.28 
  -1  -4  -4   29.85    2.90 
   1  -4   4   27.32    2.48 
  -1  -4  -4   30.86    3.28 
  -1   4  -4   30.24    3.22 
   1   4   4   30.86    3.38 
  -2  -4  -4   35.68    4.32 
  -2  -4  -4   36.70    4.13 
  -2  -4  -4   39.16    3.69 
  -2   4  -4   40.57    4.10 
  -3  -4  -4   19.22    1.83 
  -3  -4  -4   14.11    2.03 
  -3  -4  -4   17.43    2.15 
  -3   4  -4   21.35    2.06 
  -4  -4  -4   18.26    2.53 
  -4  -4  -4   22.42    2.27 
  -4  -4  -4   23.90    2.68 
  -4   4  -4   26.58    2.57 
  -5  -4  -4   38.83    4.55 
  -5  -4  -4   33.81    4.33 
  -5  -4  -4   39.93    3.91 
  -5   4  -4   44.60    3.95 
  -5   4  -4   42.97    4.36 
  -6  -4  -4    4.17    0.64 
  -6  -4  -4    5.77    0.84 
   6  -4   4    4.32    0.61 
  -6   4  -4    3.06    0.71 
   7  -4   4    1.96    0.91 
   7  -4   4    1.31    0.38 
  -7  -4  -4    1.10    0.42 
  -7   4  -4    0.92    0.51 
  -8  -4  -4    1.54    0.48 
   8  -4   4    1.13    0.36 
   8  -4   4    2.20    0.99 
   8   4   4    1.47    1.08 
  -8   4  -4    2.01    1.10 
   9  -4   4   12.48    1.51 
   9  -4   4   13.29    2.15 
  -9  -4  -4   13.04    1.30 
   9   4   4    8.38    1.93 
  -9   4  -4    9.96    2.16 
  -9   4  -4   12.37    1.58 
 -10  -4  -4    3.55    0.52 
  10  -4   4    3.17    1.19 
  10  -4   4    2.34    0.70 
 -10   4  -4    2.37    0.71 
  10   4   4    3.04    0.80 
 -10   4  -4    4.01    1.24 
  11  -4   4    9.19    1.84 
 -11  -4  -4   11.28    1.10 
  11  -4   4    9.84    1.32 
  11   4   4   10.78    1.35 
 -11   4  -4    9.12    1.33 
 -12  -4  -4    8.93    0.89 
  12  -4   4    8.40    1.56 
  12  -4   4    9.16    1.09 
 -12   4  -4    7.42    1.12 
  12   4   4   10.18    1.14 
  13  -4   4    0.61    0.25 
 -13   4  -4    0.30    0.33 
 -13  -5   4    0.69    0.34 
  13   5  -4    0.89    0.43 
 -12  -5   4    0.85    0.42 
  12   5  -4    0.96    0.52 
  11  -5  -4    3.18    0.54 
 -11  -5   4    3.00    0.45 
 -11  -5   4    2.61    0.62 
  11   5  -4    3.08    0.65 
  11   5  -4    2.85    0.70 
 -11   5   4    2.21    0.79 
 -10  -5   4    1.71    0.59 
  10  -5  -4    0.35    0.52 
 -10  -5   4    2.18    0.42 
  10  -5  -4    3.29    0.54 
 -10   5   4    4.44    1.10 
  10   5  -4    2.61    0.71 
  10   5  -4    0.96    0.71 
  -9  -5   4   15.05    1.56 
  -9  -5   4   16.70    1.94 
   9  -5  -4   17.33    1.72 
   9  -5  -4   14.14    2.06 
  -9  -5   4   14.74    1.88 
   9  -5  -4   13.76    1.96 
  -9   5   4   16.93    2.57 
  -8   5   4   18.71    2.94 
  -7   5   4    4.94    1.24 
   6  -5  -4    3.97    0.88 
   6  -5  -4    4.15    0.78 
  -6   5   4    3.46    0.77 
  -6   5   4    4.98    1.09 
   5  -5  -4    5.66    0.84 
   5  -5  -4    2.14    0.57 
  -5   5   4    2.70    0.82 
  -5   5   4    2.14    0.56 
   4  -5  -4    8.49    1.12 
   4  -5  -4    7.28    1.14 
   4  -5  -4   10.09    1.29 
  -4   5   4    5.91    1.04 
   3  -5  -4   37.12    4.28 
   3  -5  -4   32.29    4.06 
  -3  -5   4   36.90    2.96 
   3  -5  -4   37.62    3.96 
  -3   5   4   35.21    4.09 
   2  -5  -4   25.43    3.34 
  -2  -5   4   31.02    2.34 
   2  -5  -4   25.79    3.19 
   2  -5  -4   27.89    3.11 
  -2   5   4   28.84    3.20 
   1  -5  -4    1.44    0.45 
   1  -5  -4    0.83    0.35 
   1  -5  -4    1.82    0.45 
  -1  -5   4    1.27    0.29 
  -1   5   4    0.98    0.36 
   1   5  -4    1.65    0.28 
   0  -5  -4   37.42    3.75 
   0  -5   4   37.39    3.22 
   0  -5  -4   39.72    4.25 
   0  -5  -4   37.55    4.42 
   0   5   4   45.67    4.43 
   0   5  -4   37.13    4.15 
   1  -5   4   33.75    2.86 
  -1  -5  -4   32.50    3.92 
  -1  -5  -4   35.31    3.77 
  -1  -5  -4   34.93    3.34 
   1   5   4   34.51    3.89 
  -1   5  -4   35.52    3.71 
  -2  -5  -4   13.34    1.75 
  -2  -5  -4   14.55    1.47 
  -2  -5  -4   15.56    1.70 
   2   5   4   13.06    1.65 
  -2   5  -4   14.94    1.65 
  -3  -5  -4   24.19    2.80 
  -3  -5  -4   25.07    2.49 
  -3  -5  -4   23.30    2.93 
  -3   5  -4   27.79    2.80 
  -4  -5  -4   62.51    7.41 
  -4  -5  -4   71.10    6.68 
  -4  -5  -4   70.58    7.80 
  -4   5  -4   73.38    7.43 
  -5  -5  -4   24.39    2.87 
  -5  -5  -4   22.69    2.44 
  -5   5  -4   25.78    2.76 
  -6  -5  -4    0.86    0.38 
  -6  -5  -4    0.56    0.44 
  -6   5  -4    1.37    0.50 
  -7  -5  -4    8.06    1.12 
   7  -5   4   11.63    1.75 
  -8  -5  -4    9.20    1.08 
   8  -5   4   11.37    1.88 
  -8  -5  -4    9.77    1.25 
   8   5   4   10.97    1.87 
   9  -5   4    4.18    0.85 
  -9  -5  -4    5.60    0.69 
   9  -5   4    5.81    1.45 
  -9   5  -4    4.56    1.45 
  10  -5   4    1.92    1.08 
  10  -5   4    1.69    0.67 
 -10  -5  -4    3.60    0.51 
 -10   5  -4    4.38    1.27 
 -10   5  -4    4.48    0.78 
 -11  -5  -4    9.21    0.91 
  11  -5   4    7.03    1.07 
  11  -5   4    9.09    1.66 
  11   5   4    8.81    1.19 
 -11   5  -4    8.13    1.16 
  12  -5   4    1.06    0.67 
  12  -5   4    0.99    0.39 
 -12   5  -4    0.74    0.46 
 -13   5  -4    0.13    0.32 
 -13  -6   4    1.03    0.35 
  13   6  -4    1.02    0.41 
 -12  -6   4   -0.44    0.35 
  12   6  -4    0.46    0.48 
 -12   6   4    0.72    0.57 
 -11  -6   4   -0.25    0.39 
  11  -6  -4    0.11    0.28 
  11   6  -4    0.06    0.51 
 -11   6   4   -0.24    0.62 
 -10  -6   4    0.07    0.50 
 -10  -6   4    0.01    0.26 
  10  -6  -4    0.12    0.47 
 -10  -6   4    0.48    0.45 
  10  -6  -4    0.14    0.33 
 -10   6   4    1.99    0.88 
  10   6  -4    0.29    0.59 
   9  -6  -4   10.27    1.21 
  -9  -6   4   10.23    1.15 
   9  -6  -4   11.24    1.62 
  -9  -6   4    9.87    1.44 
  -9  -6   4   11.45    1.43 
  -9   6   4   12.49    2.01 
  -8  -6   4    8.98    1.01 
   8  -6  -4    9.16    1.07 
  -8   6   4    8.58    1.76 
   7  -6  -4    3.36    0.78 
   7  -6  -4    1.49    0.73 
  -7   6   4    0.50    0.89 
   6  -6  -4    7.25    1.13 
  -6   6   4    3.89    0.90 
  -6   6   4    4.44    0.99 
  -6   6   4    5.94    1.14 
   5  -6  -4    5.38    0.98 
  -5  -6   4    7.74    0.80 
   5  -6  -4    7.37    1.15 
  -5   6   4    5.32    0.98 
   4  -6  -4    5.58    0.93 
   4  -6  -4    7.33    1.05 
  -4  -6   4    6.11    0.70 
   4  -6  -4    6.68    1.08 
  -4   6   4    5.04    0.92 
   3  -6  -4   16.06    2.09 
   3  -6  -4   16.69    2.04 
  -3  -6   4   15.69    1.47 
   3  -6  -4   16.56    2.14 
  -3   6   4   18.03    2.04 
   2  -6  -4  185.54   20.79 
   2  -6  -4  190.72   21.77 
  -2  -6   4  189.28   15.09 
   2  -6  -4  185.40   19.80 
  -2   6   4  188.32   20.87 
   1  -6  -4   67.91    7.93 
   1  -6  -4   63.29    7.56 
   1  -6  -4   67.69    7.25 
  -1  -6   4   70.68    5.51 
  -1   6   4   68.91    7.59 
   0  -6  -4   17.92    2.31 
   0  -6  -4   19.63    2.49 
   0  -6   4   20.19    1.75 
   0  -6  -4   19.28    2.40 
   0  -6  -4   21.05    2.00 
   0   6   4   20.56    2.37 
   0   6  -4   21.79    2.23 
  -1  -6  -4    3.88    0.64 
   1  -6   4    3.70    0.49 
  -1  -6  -4    3.62    0.66 
  -1  -6  -4    4.41    0.52 
  -1   6  -4    4.03    0.61 
   1   6   4    3.21    0.55 
  -2  -6  -4   45.79    4.40 
  -2  -6  -4   45.30    4.93 
  -2  -6  -4   46.64    5.16 
   2   6   4   43.52    5.10 
  -2   6  -4   46.75    4.90 
  -3  -6  -4   22.51    2.44 
  -3  -6  -4   22.11    2.15 
  -3  -6  -4   19.19    2.52 
  -3   6  -4   20.95    2.40 
  -4  -6  -4   10.43    1.18 
  -4  -6  -4   11.19    1.42 
  -4  -6  -4    9.98    1.36 
  -4   6  -4    8.74    1.33 
  -5  -6  -4   21.34    2.72 
  -5  -6  -4   23.10    2.33 
  -5   6  -4   23.71    2.62 
  -6  -6  -4   17.57    2.07 
   6  -6   4   16.62    2.43 
  -6  -6  -4   14.20    1.72 
  -6   6  -4   17.17    2.07 
   7  -6   4    5.85    1.35 
  -7  -6  -4    5.55    0.87 
  -7  -6  -4    7.01    1.10 
   8  -6   4   -0.40    0.47 
   8  -6   4   -0.62    0.82 
  -8  -6  -4    0.26    0.28 
   8  -6   4    1.91    0.60 
   9  -6   4   12.46    2.07 
  -9  -6  -4   11.37    1.13 
   9  -6   4    9.50    1.30 
  -9   6  -4    9.88    2.01 
  10  -6   4    3.64    0.68 
 -10  -6  -4    4.30    0.49 
  10  -6   4    2.71    1.03 
 -10   6  -4    2.75    1.30 
 -10   6  -4    2.13    0.72 
  11  -6   4    3.18    0.58 
  11  -6   4    2.97    0.99 
 -11   6  -4    3.84    0.69 
  12  -6   4    0.58    0.63 
 -12   6  -4    0.03    0.38 
 -13   6  -4    0.04    0.30 
 -13  -7   4    0.94    0.32 
  13   7  -4    0.70    0.37 
 -12  -7   4    7.92    1.09 
  12   7  -4    9.69    1.17 
 -12   7   4    8.64    1.26 
  11  -7  -4    0.88    0.48 
 -11  -7   4    1.98    0.52 
  11   7  -4    2.22    0.61 
 -11   7   4    2.16    0.76 
  10  -7  -4    1.10    0.56 
 -10  -7   4    3.88    0.71 
  10  -7  -4    3.29    0.46 
 -10  -7   4    2.82    0.66 
  10   7  -4    3.04    0.74 
  -9  -7   4    1.12    0.46 
  -9  -7   4    1.20    0.57 
   9  -7  -4    1.54    0.38 
   9  -7  -4    0.97    0.77 
  -9  -7   4    1.33    0.53 
  -9  -7   4    0.80    0.28 
  -9   7   4   -0.16    0.96 
  -8  -7   4    3.88    0.52 
   8  -7  -4    4.12    0.58 
  -8  -7   4    3.52    0.76 
   8  -7  -4    2.90    1.01 
  -8  -7   4    2.78    0.62 
  -8  -7   4    3.91    0.75 
   8  -7  -4    3.48    0.92 
  -8   7   4    2.64    1.19 
   7  -7  -4    1.66    0.75 
   7  -7  -4    1.66    0.72 
  -7   7   4    1.63    1.00 
   6  -7  -4   -0.24    0.60 
   6  -7  -4    0.60    0.52 
  -6   7   4   -0.27    0.57 
  -5  -7   4   22.39    1.95 
   5  -7  -4   21.96    2.79 
  -5   7   4   21.21    2.66 
   4  -7  -4    2.87    0.60 
  -4  -7   4    2.51    0.45 
   4  -7  -4    2.47    0.67 
   4  -7  -4    2.73    0.71 
  -4   7   4    1.29    0.47 
   3  -7  -4    2.18    0.53 
   3  -7  -4    3.11    0.66 
   3  -7  -4    2.08    0.57 
  -3  -7   4    1.16    0.36 
  -3   7   4    1.41    0.43 
   2  -7  -4   71.53    8.20 
   2  -7  -4   67.72    7.50 
   2  -7  -4   72.65    7.82 
  -2  -7   4   66.89    5.69 
  -2   7   4   68.80    7.85 
   1  -7  -4   67.27    7.33 
   1  -7  -4   64.32    7.67 
   1  -7  -4   63.68    7.02 
  -1  -7   4   68.49    5.35 
  -1   7   4   62.65    7.34 
   0  -7   4   35.46    2.96 
   0  -7  -4   38.48    4.06 
   0  -7  -4   34.69    3.89 
   0  -7  -4   34.40    4.22 
   0   7  -4   35.09    3.79 
   0   7   4   33.74    4.02 
  -1  -7  -4   38.46    4.66 
   1  -7   4   37.98    3.27 
  -1  -7  -4   39.60    3.80 
  -1  -7  -4   38.76    4.47 
  -1  -7  -4   35.55    4.28 
   1   7   4   39.79    4.44 
  -1   7  -4   42.68    4.24 
  -2  -7  -4    6.16    1.03 
  -2  -7  -4    6.45    0.86 
  -2  -7  -4    7.69    1.08 
  -2   7  -4    9.59    1.09 
  -3  -7  -4   10.02    1.45 
  -3  -7  -4   12.00    1.28 
  -3  -7  -4    9.55    1.46 
  -3   7  -4   12.20    1.45 
  -4  -7  -4   36.44    3.65 
  -4  -7  -4   38.67    4.28 
  -4   7  -4   35.62    4.08 
  -5  -7  -4    1.71    0.54 
  -5  -7  -4    2.03    0.45 
  -5   7  -4    1.13    0.53 
  -6  -7  -4    2.84    0.69 
   6  -7   4    2.93    0.96 
  -6  -7  -4    2.93    0.58 
   7  -7   4    7.59    1.38 
  -7  -7  -4    5.58    1.05 
  -7  -7  -4    5.34    0.85 
   8  -7   4    5.45    1.33 
  -8  -7  -4    4.83    0.97 
  -8  -7  -4    6.32    0.67 
   8  -7   4    7.11    0.88 
  -8  -7  -4    4.24    0.88 
   8  -7   4    6.26    0.97 
  -9  -7  -4    0.90    0.57 
   9  -7   4    0.49    0.91 
   9  -7   4    1.53    0.54 
  -9  -7  -4    1.36    0.28 
  -9   7  -4    1.60    1.18 
  10  -7   4    0.01    0.39 
  10  -7   4   -0.33    0.75 
 -10   7  -4    1.29    0.58 
  11  -7   4    4.13    0.96 
 -11   7  -4    2.55    0.63 
  12  -7   4    1.21    0.65 
 -12   7  -4    0.78    0.41 
 -13   7  -4    0.18    0.28 
 -12  -8   4    0.65    0.36 
 -12   8   4    0.42    0.53 
  12   8  -4    0.55    0.42 
  11  -8  -4   -0.22    0.41 
 -11  -8   4   -0.10    0.39 
  11   8  -4    1.19    0.52 
 -11   8   4    0.00    0.62 
 -10  -8   4    6.49    0.88 
  10  -8  -4    4.76    0.99 
 -10  -8   4    4.66    0.73 
 -10  -8   4    4.65    0.85 
  10   8  -4    4.82    0.92 
   9  -8  -4    1.43    0.33 
  -9  -8   4    1.32    0.53 
  -9  -8   4    0.63    0.41 
  -9  -8   4    1.30    0.55 
   9  -8  -4    0.41    0.78 
   9  -8  -4    1.55    0.77 
  -8  -8   4   13.37    1.65 
   8  -8  -4   11.90    1.94 
   8  -8  -4   13.89    1.90 
   8  -8  -4   11.74    1.31 
  -8  -8   4   13.47    1.59 
  -8  -8   4   16.18    1.77 
   8  -8  -4   11.25    1.93 
   8  -8  -4   13.81    1.76 
   7  -8  -4    4.51    0.88 
   7  -8  -4    3.92    1.00 
   7  -8  -4    4.68    0.60 
   7  -8  -4    4.47    1.00 
   6  -8  -4    3.45    0.92 
   6  -8  -4    4.27    0.94 
   5  -8  -4    2.96    0.79 
   5  -8  -4    2.26    0.79 
   4  -8  -4    0.61    0.49 
   4  -8  -4    1.31    0.57 
  -4  -8   4    1.36    0.41 
  -4   8   4    0.27    0.38 
   3  -8  -4   10.71    1.53 
   3  -8  -4    7.63    1.38 
  -3  -8   4   10.20    1.04 
   3  -8  -4   11.80    1.44 
  -3   8   4    8.69    1.36 
   2  -8  -4   47.65    5.84 
   2  -8  -4   55.08    6.38 
   2  -8  -4   57.24    6.08 
  -2  -8   4   54.41    4.44 
  -2   8   4   52.64    6.10 
   1  -8  -4    4.66    0.78 
   1  -8  -4    3.26    0.74 
   1  -8  -4    5.24    0.88 
  -1  -8   4    4.20    0.60 
  -1   8   4    4.20    0.72 
   0  -8  -4   58.29    6.22 
   0  -8   4   56.49    4.54 
   0  -8  -4   56.30    6.50 
   0  -8  -4   48.61    5.94 
   0   8   4   54.20    6.20 
  -1  -8  -4    3.58    0.47 
  -1  -8  -4    4.02    0.70 
  -1  -8  -4    3.78    0.66 
   1  -8   4    1.89    0.42 
  -1  -8  -4    2.78    0.64 
   1   8   4    2.76    0.55 
  -1   8  -4    1.40    0.50 
  -2  -8  -4   14.57    1.96 
  -2  -8  -4   16.70    1.98 
  -2  -8  -4   15.61    1.64 
  -2   8  -4   15.88    1.87 
  -3  -8  -4    5.45    0.91 
  -3  -8  -4    4.30    0.88 
  -3  -8  -4    5.10    0.72 
  -3   8  -4    6.34    0.92 
  -4  -8  -4    9.22    1.13 
  -4  -8  -4   10.88    1.42 
  -4   8  -4    8.18    1.32 
   5  -8   4    7.25    1.56 
  -5  -8  -4   11.57    1.27 
  -5  -8  -4   11.38    1.49 
  -5   8  -4   10.12    1.46 
  -6  -8  -4   12.77    1.70 
  -6  -8  -4    9.46    1.36 
   6  -8   4   12.64    1.91 
   6  -8   4   13.12    1.95 
   7  -8   4    7.57    1.37 
   7  -8   4    4.78    1.08 
   7  -8   4    7.06    1.35 
   7  -8   4    5.21    0.74 
  -7  -8  -4    4.02    0.79 
  -7  -8  -4    5.91    1.05 
  -8  -8  -4    3.66    0.77 
   8  -8   4    6.43    1.34 
   8  -8   4    5.01    0.85 
  -8  -8  -4    3.11    0.83 
   8  -8   4    4.32    0.65 
  -9  -8  -4   25.79    2.80 
   9  -8   4   27.53    3.61 
  -9   8  -4   22.44    3.78 
 -10  -8  -4    8.81    1.12 
  10  -8   4    6.00    1.43 
 -10   8  -4    7.74    1.12 
  11  -8   4    1.62    0.78 
 -11   8  -4    1.74    0.53 
 -12   8  -4   -0.02    0.34 
 -12  -9   4    0.70    0.35 
  12   9  -4    1.02    0.41 
 -12   9   4    0.79    0.51 
 -11  -9   4    3.40    0.62 
 -11   9   4    3.22    0.83 
  11   9  -4    3.44    0.69 
 -10  -9   4    3.25    0.66 
 -10  -9   4    4.58    0.78 
  10  -9  -4    3.46    0.92 
 -10  -9   4    4.82    0.66 
  10  -9  -4    5.05    0.94 
  10   9  -4    3.30    0.80 
   9  -9  -4    8.93    1.55 
  -9  -9   4    8.84    1.30 
   9  -9  -4    7.57    1.31 
  -9  -9   4    9.63    1.20 
  -9  -9   4    8.83    1.22 
   9  -9  -4   13.39    1.62 
   8  -9  -4    6.27    1.13 
  -8  -9   4    6.70    1.01 
  -8  -9   4    8.03    1.16 
   8  -9  -4    6.45    1.30 
   8  -9  -4   10.42    1.43 
   8  -9  -4    7.12    1.34 
  -8  -9   4    7.37    1.09 
  -7  -9   4   12.64    1.77 
  -7  -9   4   15.56    1.79 
   7  -9  -4   13.91    1.86 
   7  -9  -4   13.31    2.08 
   7  -9  -4   13.09    2.05 
   7  -9  -4   15.17    2.04 
  -7  -9   4   13.98    1.67 
   6  -9  -4   12.89    1.88 
   6  -9  -4   10.64    1.81 
   5  -9  -4   10.15    1.63 
   5  -9  -4   10.71    1.70 
  -4  -9   4    7.30    0.96 
   4  -9  -4    8.04    1.44 
   4  -9  -4   10.73    1.48 
   4  -9  -4    8.75    1.40 
  -3  -9   4    8.01    0.88 
   3  -9  -4    7.25    1.25 
   3  -9  -4    5.48    1.11 
   3  -9  -4   11.78    1.28 
  -3   9   4    5.26    1.05 
   2  -9  -4    1.96    0.58 
   2  -9  -4    2.59    0.58 
   2  -9  -4    1.76    0.59 
  -2  -9   4    1.23    0.42 
  -2   9   4    1.54    0.47 
  -1  -9   4    3.66    0.57 
   1  -9  -4    4.57    0.80 
   1  -9  -4    4.14    0.81 
   1  -9  -4    3.03    0.65 
  -1   9   4    2.77    0.63 
   0  -9  -4   24.62    2.97 
   0  -9  -4   21.09    2.86 
   0  -9   4   25.27    2.20 
   0  -9  -4   25.46    3.11 
   0   9   4   27.77    2.96 
   1  -9   4   -0.07    0.29 
  -1  -9  -4   -0.26    0.39 
  -1  -9  -4    0.05    0.33 
  -1   9  -4    0.36    0.39 
  -2  -9  -4   30.82    2.80 
  -2  -9  -4   26.63    3.19 
  -2  -9  -4   28.96    3.31 
  -2   9  -4   24.83    3.12 
  -3  -9  -4   49.62    4.88 
  -3  -9  -4   49.65    5.72 
  -3   9  -4   50.79    5.46 
  -4  -9  -4    0.95    0.39 
  -4  -9  -4    0.39    0.42 
  -4   9  -4    1.48    0.58 
   5  -9   4    9.59    1.67 
  -5  -9  -4   11.49    1.56 
   5  -9   4   10.75    1.77 
  -5  -9  -4    9.29    1.24 
  -6  -9  -4    8.88    1.36 
  -6  -9  -4    6.98    1.06 
   6  -9   4    9.29    1.58 
   6  -9   4   10.20    1.68 
   7  -9   4   10.24    1.73 
  -7  -9  -4    9.23    1.26 
   7  -9   4    8.50    1.46 
  -7  -9  -4    6.83    1.33 
  -7  -9  -4    9.75    1.21 
   7  -9   4   10.56    1.33 
   7  -9   4    9.87    1.53 
   7  -9   4    9.14    1.65 
  -8  -9  -4    0.01    0.37 
   8  -9   4    0.40    0.85 
  -8  -9  -4   -0.13    0.42 
   8  -9   4    0.49    0.67 
   8  -9   4    0.16    0.84 
   8  -9   4    0.27    0.94 
   8  -9   4   -0.99    0.48 
  -8  -9  -4    0.34    0.48 
  -9  -9  -4    2.71    0.60 
   9  -9   4    1.12    0.85 
  -9   9  -4    2.13    1.26 
  10  -9   4    0.89    0.79 
 -10  -9  -4    1.60    0.54 
 -10   9  -4    2.78    0.64 
  11  -9   4    0.00    0.63 
 -11  -9  -4    1.70    0.49 
 -11   9  -4    0.43    0.44 
 -12   9  -4   -0.29    0.31 
 -12 -10   4    0.59    0.31 
 -12  10   4    0.79    0.46 
  12  10  -4    0.60    0.35 
 -11 -10   4    1.42    0.44 
  11 -10  -4    0.22    0.39 
 -11 -10   4    1.04    0.31 
 -11  10   4    0.56    0.61 
  11  10  -4    1.77    0.51 
 -10 -10   4    5.18    0.72 
  10 -10  -4    4.59    0.88 
  10 -10  -4    6.40    1.03 
 -10 -10   4    5.66    0.86 
  10  10  -4    4.16    0.87 
   9 -10  -4    2.02    0.70 
   9 -10  -4    1.50    0.84 
  -9 -10   4    1.51    0.50 
   9 -10  -4    0.44    0.57 
  -9 -10   4    1.15    0.42 
  -9 -10   4    2.46    0.64 
   8 -10  -4   -0.64    0.59 
   8 -10  -4    0.78    0.82 
  -8 -10   4    0.01    0.38 
   8 -10  -4   -0.05    0.55 
  -8 -10   4   -0.15    0.51 
   8 -10  -4    0.47    0.63 
  -8 -10   4   -0.82    0.47 
  -7 -10   4    0.56    0.60 
   7 -10  -4    0.92    0.83 
   7 -10  -4    0.71    0.72 
  -7 -10   4    0.54    0.42 
   7 -10  -4    1.47    0.67 
   7 -10  -4    2.05    0.62 
  -7 -10   4    1.31    0.60 
   6 -10  -4    1.72    0.73 
   6 -10  -4    2.01    0.74 
  -6 -10   4    1.85    0.48 
   6 -10  -4    0.84    0.60 
   5 -10  -4    0.55    0.55 
   5 -10  -4    0.22    0.62 
   4 -10  -4    6.31    1.02 
   4 -10  -4    2.33    0.85 
   3 -10  -4    1.76    0.59 
   3 -10  -4    2.25    0.68 
   3 -10  -4    1.58    0.62 
   3 -10  -4    1.00    0.60 
   2 -10  -4    8.21    1.38 
  -2 -10   4   10.13    1.06 
   2 -10  -4    9.64    1.36 
   2 -10  -4    9.55    1.51 
  -2  10   4    9.07    1.36 
  -1 -10   4   43.01    3.82 
   1 -10  -4   47.33    5.46 
   1 -10  -4   48.70    5.21 
   1 -10  -4   42.03    5.02 
  -1  10   4   44.30    5.21 
   0 -10  -4   13.31    1.94 
   0 -10  -4   16.38    1.93 
   0 -10  -4   16.86    2.01 
   0 -10   4   16.39    1.52 
   0  10   4   12.18    1.89 
  -1 -10  -4    3.51    0.83 
  -1 -10  -4    4.69    0.80 
  -2 -10  -4    6.60    1.05 
  -2 -10  -4    5.36    1.03 
  -2 -10  -4    6.32    0.81 
  -2  10  -4    6.14    1.00 
  -3 -10  -4    2.38    0.62 
  -3 -10  -4    1.70    0.47 
  -3  10  -4    2.90    0.71 
   4 -10   4   17.82    2.50 
  -4 -10  -4   17.86    2.19 
  -4 -10  -4   15.63    1.82 
  -4  10  -4   17.13    2.21 
  -5 -10  -4    2.76    0.61 
   5 -10   4    4.14    1.10 
   5 -10   4    2.19    0.82 
  -5 -10  -4    3.38    0.80 
  -6 -10  -4    2.77    0.62 
   6 -10   4    3.64    1.10 
   6 -10   4    2.82    0.89 
  -6 -10  -4    4.10    0.83 
   6 -10   4    4.14    0.97 
  -7 -10  -4    1.92    0.52 
   7 -10   4    5.67    1.02 
   7 -10   4    1.96    1.02 
   7 -10   4    2.40    0.86 
  -7 -10  -4    1.97    0.58 
   7 -10   4    1.81    0.87 
  -7 -10  -4    1.42    0.60 
   7 -10   4    1.60    0.64 
  -8 -10  -4   10.15    1.20 
   8 -10   4   11.39    1.54 
   8 -10   4    6.20    1.47 
   8 -10   4    8.34    1.25 
  -8 -10  -4    9.33    1.43 
   8 -10   4    9.22    1.55 
  -8 -10  -4    9.01    1.25 
   8 -10   4    9.51    1.64 
   9 -10   4    0.46    0.82 
  -9 -10  -4    1.10    0.49 
  -9 -10  -4    1.94    0.43 
   9 -10   4    0.36    0.76 
  10 -10   4    1.06    0.78 
 -10 -10  -4    2.49    0.58 
 -10  10  -4    3.81    0.66 
  11 -10   4    1.46    0.63 
 -11 -10  -4    1.89    0.47 
 -11  10  -4    1.57    0.48 
 -12  10  -4    1.20    0.37 
  11 -11  -4    0.04    0.34 
 -11 -11   4    0.87    0.38 
 -11 -11   4    0.59    0.25 
 -11  11   4    1.72    0.63 
  11  11  -4    1.25    0.43 
 -10 -11   4    7.13    1.01 
 -10 -11   4    6.36    0.86 
  10 -11  -4    6.08    1.15 
  10  11  -4    7.98    1.04 
   9 -11  -4    7.71    1.26 
   9 -11  -4    6.94    1.26 
  -9 -11   4    7.72    0.97 
  -9 -11   4    6.02    1.05 
   8 -11  -4   20.30    2.90 
  -8 -11   4   22.40    2.60 
   8 -11  -4   23.47    3.08 
   8 -11  -4   22.89    2.71 
   8 -11  -4   24.79    2.81 
  -8 -11   4   21.22    2.48 
  -8 -11   4   22.54    2.52 
  -7 -11   4    0.50    0.59 
   7 -11  -4    1.10    0.77 
   7 -11  -4    0.34    0.65 
   7 -11  -4    0.64    0.64 
  -7 -11   4    0.59    0.60 
   7 -11  -4    0.35    0.58 
  -7 -11   4    1.41    0.45 
   6 -11  -4   13.86    1.91 
   6 -11  -4    9.62    1.79 
   6 -11  -4   11.01    1.70 
  -6 -11   4   12.01    1.57 
  -6 -11   4   11.78    1.44 
   6 -11  -4   10.84    1.63 
   5 -11  -4    2.42    0.77 
   5 -11  -4    4.46    1.00 
   5 -11  -4    3.71    0.91 
   4 -11  -4    3.01    0.83 
   4 -11  -4    3.26    0.90 
   3 -11  -4    5.17    1.02 
   3 -11  -4    2.77    0.79 
   2 -11  -4   14.66    2.25 
   2 -11  -4   16.39    2.23 
   2 -11  -4   15.33    2.17 
   2 -11  -4   16.67    2.06 
   1 -11  -4    4.88    0.86 
   1 -11  -4    5.75    0.89 
   1 -11  -4    5.00    0.98 
   1 -11  -4    4.46    0.94 
  -1  11   4    2.71    0.80 
   0 -11  -4    0.80    0.45 
   0 -11  -4    0.00    0.50 
   0 -11  -4    1.54    0.58 
   0 -11  -4    2.14    0.57 
  -1 -11  -4    0.95    0.63 
  -1 -11  -4    1.89    0.54 
  -1 -11  -4    2.38    0.59 
  -2 -11  -4    3.99    0.80 
  -2 -11  -4    3.34    0.69 
  -3 -11  -4    2.96    0.73 
   3 -11   4    3.80    1.10 
  -3 -11  -4    3.09    0.59 
  -3  11  -4    3.44    0.84 
  -4 -11  -4    4.04    0.88 
   4 -11   4    4.54    1.18 
  -4 -11  -4    5.08    0.79 
   5 -11   4   10.40    1.91 
  -5 -11  -4   10.09    1.39 
   5 -11   4   11.68    1.86 
   5 -11   4   12.64    1.79 
  -5 -11  -4   12.49    1.45 
  -5 -11  -4   11.17    1.68 
  -6 -11  -4    6.88    0.95 
   6 -11   4    8.10    1.54 
  -6 -11  -4    7.03    0.93 
   6 -11   4    5.05    1.20 
   6 -11   4    5.16    1.24 
  -6 -11  -4    5.36    1.04 
   6 -11   4    5.52    1.02 
   6 -11   4    6.97    1.26 
   7 -11   4    0.20    0.72 
   7 -11   4    1.62    0.89 
   7 -11   4    1.01    0.59 
  -7 -11  -4    0.92    0.50 
   7 -11   4    2.36    0.89 
   7 -11   4    2.06    1.01 
  -7 -11  -4    1.05    0.44 
  -7 -11  -4    0.93    0.56 
   8 -11   4    0.85    0.86 
  -8 -11  -4    2.38    0.60 
   8 -11   4    2.66    0.91 
   8 -11   4    1.88    0.81 
   8 -11   4    2.64    0.64 
  -8 -11  -4    1.89    0.68 
  -8 -11  -4    2.26    0.48 
   8 -11   4    2.12    0.81 
  -9 -11  -4    2.83    0.54 
   9 -11   4    2.01    0.90 
   9 -11   4    2.41    0.75 
  -9 -11  -4    3.48    0.63 
   9 -11   4    2.64    0.91 
   9 -11   4    1.94    0.89 
  10 -11   4    0.41    0.66 
 -10 -11  -4    1.49    0.47 
 -10  11  -4    2.66    0.58 
 -11 -11  -4   -0.30    0.34 
 -11  11  -4   -0.23    0.36 
 -11 -12   4    2.21    0.43 
 -11 -12   4    2.00    0.34 
  11  12  -4    1.97    0.47 
 -11  12   4    2.19    0.60 
 -10 -12   4    3.69    0.65 
  10 -12  -4    4.52    0.78 
 -10 -12   4    3.20    0.50 
  10  12  -4    3.22    0.68 
  -9 -12   4    3.28    0.57 
  -9 -12   4    3.25    0.70 
   9 -12  -4    3.85    0.87 
   9 -12  -4    4.73    0.89 
   8 -12  -4    0.39    0.56 
  -8 -12   4    0.92    0.38 
   8 -12  -4    0.21    0.69 
  -8 -12   4    1.09    0.51 
   8 -12  -4    0.27    0.65 
   8 -12  -4    0.34    0.61 
  -8 -12   4    2.11    0.60 
  -7 -12   4    2.44    0.68 
  -7 -12   4    3.22    0.58 
   7 -12  -4    1.84    0.81 
  -7 -12   4    2.67    0.72 
   7 -12  -4    1.85    0.83 
   7 -12  -4    3.57    0.80 
   7 -12  -4    3.04    0.85 
   6 -12  -4   15.03    2.02 
   6 -12  -4   15.99    2.28 
   6 -12  -4   18.17    2.34 
  -6 -12   4   14.83    1.81 
   6 -12  -4   12.89    2.04 
  -6 -12   4   15.62    1.96 
   5 -12  -4    3.26    1.00 
  -5 -12   4    3.23    0.59 
   5 -12  -4    2.12    0.79 
  -5 -12   4    2.32    0.71 
   5 -12  -4    2.90    0.88 
   5 -12  -4    2.79    0.75 
   4 -12  -4    7.24    1.19 
   4 -12  -4    5.17    1.14 
   4 -12  -4    4.64    1.01 
   3 -12  -4    5.72    1.17 
   3 -12  -4    5.59    1.08 
   2 -12  -4    2.46    0.65 
   2 -12  -4    1.29    0.64 
   1 -12  -4   12.31    1.77 
   1 -12  -4   14.30    1.98 
   1 -12  -4   12.19    1.74 
   0 -12  -4    3.00    0.66 
   0 -12  -4    1.68    0.53 
  -1 -12  -4    3.92    0.79 
   1 -12   4    7.04    1.31 
  -1 -12  -4    4.42    0.87 
  -2 -12  -4    6.29    1.13 
   2 -12   4    8.93    1.56 
   3 -12   4    8.27    1.52 
   3 -12   4   13.18    1.90 
  -3 -12  -4    9.39    1.46 
   4 -12   4   10.41    1.67 
   4 -12   4    7.81    1.37 
  -4 -12  -4    7.20    1.08 
  -4 -12  -4    8.35    1.10 
  -4 -12  -4    8.49    1.31 
  -5 -12  -4    0.08    0.39 
   5 -12   4    2.18    0.96 
   5 -12   4   -0.32    0.60 
   5 -12   4   -0.04    0.74 
   5 -12   4   -0.24    0.59 
  -5 -12  -4    0.09    0.52 
  -5 -12  -4   -0.20    0.44 
   6 -12   4    3.43    1.22 
  -6 -12  -4    6.56    0.84 
   6 -12   4    5.22    1.18 
  -6 -12  -4    5.19    0.86 
  -6 -12  -4    5.98    1.04 
   6 -12   4    5.43    1.11 
   6 -12   4    4.87    1.15 
   6 -12   4    4.25    0.93 
   7 -12   4    2.89    0.90 
  -7 -12  -4    3.18    0.61 
  -7 -12  -4    2.78    0.80 
   7 -12   4    2.56    0.71 
   7 -12   4    4.20    1.03 
   7 -12   4    4.42    1.26 
  -7 -12  -4    3.90    0.69 
   7 -12   4    2.30    0.96 
   8 -12   4    3.60    0.87 
   8 -12   4    1.39    0.91 
  -8 -12  -4    2.77    0.53 
   8 -12   4    1.39    0.77 
   8 -12   4    2.56    0.92 
   8 -12   4    2.98    0.66 
  -8 -12  -4    2.96    0.63 
   9 -12   4   -0.14    0.68 
   9 -12   4    0.55    0.75 
  -9 -12  -4    1.09    0.36 
   9 -12   4    0.05    0.56 
  -9 -12  -4    0.38    0.42 
 -10 -12  -4    1.33    0.46 
  10 -12   4    0.13    0.63 
  10 -12   4    0.77    0.61 
 -10 -12  -4    1.27    0.36 
 -10  12  -4    2.64    0.53 
 -11 -12  -4    0.32    0.31 
 -11  12  -4    0.30    0.35 
 -11  13   4    0.69    0.42 
 -10 -13   4    3.51    0.57 
 -10 -13   4    2.78    0.44 
  10  13  -4    3.44    0.61 
   9 -13  -4    3.07    0.74 
   9 -13  -4    3.65    0.82 
  -9 -13   4    4.76    0.74 
  -9 -13   4    3.82    0.58 
   8 -13  -4    4.65    0.95 
   8 -13  -4    2.48    0.74 
   8 -13  -4    3.60    0.85 
  -8 -13   4    3.96    0.75 
  -8 -13   4    3.45    0.58 
   7 -13  -4    3.35    0.80 
   7 -13  -4    2.47    0.71 
  -7 -13   4    2.65    0.53 
   7 -13  -4    1.70    0.77 
  -7 -13   4    2.14    0.67 
   7 -13  -4    2.94    0.88 
   6 -13  -4   10.55    1.56 
  -6 -13   4   11.24    1.52 
   6 -13  -4   10.51    1.63 
   6 -13  -4   13.10    1.80 
  -6 -13   4   10.90    1.36 
   6 -13  -4    9.12    1.70 
   5 -13  -4    8.34    1.51 
   5 -13  -4    9.83    1.42 
   5 -13  -4    7.75    1.43 
  -5 -13   4    8.37    1.27 
   5 -13  -4   10.11    1.40 
  -5 -13   4    8.65    1.16 
  -4 -13   4    4.44    0.89 
   4 -13  -4    3.19    0.97 
  -4 -13   4    4.77    0.75 
   4 -13  -4    5.33    1.08 
   4 -13  -4    5.79    1.00 
   3 -13  -4    4.79    0.98 
   3 -13  -4    3.97    1.01 
  -3 -13   4    5.87    0.93 
   3 -13  -4    4.83    1.00 
   2 -13  -4   11.19    1.53 
   2 -13  -4    8.19    1.59 
   2 -13  -4   11.31    1.57 
   1 -13  -4    8.08    1.26 
   1 -13  -4    6.72    1.17 
   1 -13  -4    7.70    1.33 
   0 -13  -4    4.45    0.84 
   0 -13  -4    3.09    0.69 
  -1 -13  -4    2.73    0.72 
   1 -13   4    3.96    1.10 
  -1 -13  -4    2.84    0.68 
   2 -13   4   12.81    2.04 
   2 -13   4   11.53    1.83 
  -2 -13  -4   12.76    1.80 
  -3 -13  -4    3.75    0.68 
  -3 -13  -4    2.85    0.77 
   3 -13   4    3.28    0.92 
  -3 -13  -4    3.34    0.69 
   3 -13   4    3.05    0.76 
   3 -13   4    4.03    1.03 
   3 -13   4    3.21    1.09 
   4 -13   4    5.79    1.18 
   4 -13   4    8.38    1.53 
  -4 -13  -4    5.59    0.94 
  -4 -13  -4    7.45    1.21 
   4 -13   4    5.41    1.01 
   4 -13   4    4.89    1.27 
  -4 -13  -4    8.65    0.99 
  -5 -13  -4    1.76    0.50 
   5 -13   4    2.04    0.91 
   5 -13   4    2.12    1.03 
  -5 -13  -4    0.84    0.44 
   5 -13   4    0.89    0.65 
  -5 -13  -4    1.78    0.66 
   5 -13   4    1.43    0.74 
  -6 -13  -4    6.02    0.88 
  -6 -13  -4    4.45    0.99 
  -6 -13  -4    5.05    0.80 
   6 -13   4    4.86    1.11 
   6 -13   4    6.85    1.00 
   6 -13   4    5.74    1.22 
   6 -13   4    6.28    1.50 
   7 -13   4    0.18    0.61 
   7 -13   4   -0.42    0.72 
   7 -13   4   -0.76    0.67 
  -7 -13  -4    0.18    0.35 
   7 -13   4   -0.81    0.48 
  -7 -13  -4   -0.18    0.43 
   7 -13   4    0.43    0.63 
   8 -13   4    0.26    0.48 
  -8 -13  -4    2.52    0.53 
   8 -13   4    0.43    0.62 
   8 -13   4    2.27    0.71 
   8 -13   4    1.81    0.89 
   8 -13   4    0.51    0.76 
  -8 -13  -4    1.73    0.41 
   9 -13   4    0.92    0.53 
   9 -13   4    0.69    0.70 
  -9 -13  -4    1.10    0.42 
   9 -13   4    0.07    0.60 
  -9 -13  -4    0.30    0.31 
  10 -13   4    1.65    0.64 
 -10 -13  -4    2.30    0.48 
 -10 -13  -4    2.27    0.40 
 -10  13  -4    2.30    0.52 
 -10 -14   4    0.62    0.22 
  10 -14  -4    0.17    0.32 
 -10 -14   4    0.97    0.33 
  10  14  -4    0.65    0.37 
  -9 -14   4    1.81    0.32 
   9 -14  -4    1.42    0.45 
  -9 -14   4    0.48    0.22 
   9 -14  -4    0.14    0.24 
  -9 -14   4    1.83    0.46 
   9  14  -4    3.20    0.57 
   8 -14  -4    1.87    0.76 
   8 -14  -4    1.17    0.50 
  -8 -14   4    0.80    0.51 
   8 -14  -4    1.51    0.55 
  -8 -14   4    1.80    0.40 
   7 -14  -4    1.96    0.64 
  -7 -14   4    2.53    0.51 
  -7 -14   4    3.56    0.73 
   7 -14  -4    2.82    0.72 
   7 -14  -4    2.54    0.85 
   6 -14  -4   19.02    2.29 
  -6 -14   4   18.75    2.16 
   6 -14  -4   17.79    2.22 
  -6 -14   4   16.80    1.99 
   6 -14  -4   18.73    2.55 
   6 -14  -4   14.54    2.34 
   5 -14  -4    0.22    0.51 
   5 -14  -4    0.70    0.59 
  -5 -14   4   -0.62    0.35 
  -5 -14   4   -0.03    0.54 
   5 -14  -4    0.74    0.82 
   5 -14  -4    0.06    0.60 
   4 -14  -4    5.56    1.05 
  -4 -14   4    8.21    1.09 
   4 -14  -4    5.68    1.12 
  -4 -14   4    6.63    0.89 
   4 -14  -4    4.14    1.11 
  -3 -14   4    6.96    1.12 
   3 -14  -4    6.14    1.28 
   3 -14  -4    7.17    1.23 
   3 -14  -4    7.78    1.20 
   2 -14  -4    0.30    0.45 
  -2 -14   4   -0.16    0.51 
   2 -14  -4    0.29    0.57 
   2 -14  -4    0.14    0.61 
   1 -14  -4    5.82    0.87 
   1 -14  -4    4.56    0.88 
  -1 -14   4    3.64    0.82 
   0 -14  -4    2.66    0.79 
   0 -14  -4    4.02    0.73 
   0 -14   4    2.70    0.72 
   0 -14   4    3.39    1.01 
   0 -14  -4    3.08    0.72 
   1 -14   4   18.30    2.41 
   1 -14   4   15.89    1.92 
  -1 -14  -4   16.28    1.84 
   1 -14   4   20.15    2.30 
  -1 -14  -4   12.99    2.08 
  -1 -14  -4   14.11    2.07 
  -2 -14  -4   22.92    2.68 
   2 -14   4   26.81    3.17 
   2 -14   4   22.57    3.03 
   2 -14   4   23.88    2.73 
  -2 -14  -4   26.31    3.00 
   2 -14   4   24.68    3.04 
  -2 -14  -4   23.41    2.71 
   3 -14   4    4.28    1.06 
   3 -14   4    3.46    0.92 
  -3 -14  -4    2.00    0.73 
  -3 -14  -4    3.71    0.70 
   3 -14   4    2.46    0.74 
   3 -14   4    5.56    1.20 
  -3 -14  -4    4.52    0.72 
  -4 -14  -4    2.33    0.58 
   4 -14   4    1.97    0.70 
   4 -14   4    2.73    1.04 
  -4 -14  -4    1.31    0.65 
  -4 -14  -4    3.24    0.58 
   4 -14   4    2.33    0.93 
   4 -14   4    2.77    0.82 
   5 -14   4    6.38    1.43 
  -5 -14  -4    6.04    0.85 
   5 -14   4    5.78    1.00 
  -5 -14  -4    5.63    1.04 
   5 -14   4    7.56    1.34 
  -5 -14  -4    5.01    0.86 
   5 -14   4    5.03    1.12 
   6 -14   4    0.62    0.76 
   6 -14   4    1.04    0.70 
   6 -14   4    0.27    0.93 
  -6 -14  -4    0.34    0.53 
  -6 -14  -4    1.62    0.53 
  -6 -14  -4    1.09    0.40 
   6 -14   4    1.16    0.61 
  -7 -14  -4   -0.25    0.38 
   7 -14   4    0.22    0.58 
   7 -14   4    0.02    0.75 
  -7 -14  -4    0.03    0.32 
   7 -14   4    0.12    0.52 
   7 -14   4   -0.20    0.58 
  -8 -14  -4    5.39    0.70 
   8 -14   4    5.03    1.01 
  -8 -14  -4    2.61    0.52 
   8 -14   4    3.32    0.88 
   8 -14   4    3.45    0.68 
   8 -14   4    3.46    0.81 
   8 -14   4    2.22    0.90 
   9 -14   4    0.69    0.65 
  -9 -14  -4    0.78    0.32 
   9 -14   4    1.40    0.51 
  -9 -14  -4    0.72    0.38 
  10 -14   4    0.52    0.48 
 -10 -14  -4    0.47    0.32 
 -10  14  -4    0.56    0.35 
  -9 -15   4   -0.54    0.30 
  -9 -15   4    0.31    0.22 
   9 -15  -4    0.27    0.35 
  -8 -15   4    6.65    0.97 
  -8 -15   4    7.03    0.88 
   8 -15  -4    7.75    1.10 
   7 -15  -4    1.28    0.53 
   7 -15  -4   -0.45    0.39 
  -7 -15   4    0.96    0.51 
   7 -15  -4    1.26    0.71 
  -7 -15   4    0.56    0.34 
   6 -15  -4    1.13    0.72 
  -6 -15   4    0.51    0.52 
  -6 -15   4    0.36    0.34 
   6 -15  -4   -0.38    0.49 
   6 -15  -4    0.19    0.47 
   5 -15  -4   16.56    2.56 
  -5 -15   4   18.44    2.18 
  -5 -15   4   18.58    2.05 
   5 -15  -4   19.99    2.30 
   5 -15  -4   16.46    2.39 
   4 -15  -4    0.64    0.56 
   4 -15  -4    0.24    0.61 
  -4 -15   4    0.03    0.39 
  -4 -15   4    0.15    0.55 
   4 -15  -4   -0.06    0.49 
   3 -15  -4    2.08    0.82 
   3 -15  -4    3.89    0.81 
   3 -15  -4    4.47    0.89 
  -3 -15   4    3.09    0.77 
   2 -15  -4    5.00    1.11 
  -2 -15   4    5.86    0.92 
   2 -15  -4    4.76    0.95 
  -1 -15   4    7.38    0.94 
   1 -15  -4    4.36    0.95 
   0 -15  -4   16.06    2.17 
   0 -15   4   14.22    1.95 
   0 -15   4   18.55    2.35 
   0 -15  -4   17.31    1.92 
  -1 -15  -4    5.87    0.85 
   1 -15   4    4.74    1.21 
  -1 -15  -4    3.92    0.90 
   1 -15   4    3.29    1.07 
   1 -15   4    4.70    0.86 
   2 -15   4    3.96    1.14 
  -2 -15  -4    6.00    0.83 
   2 -15   4    6.66    1.18 
  -2 -15  -4    5.21    0.99 
   2 -15   4    4.72    0.89 
   2 -15   4    4.96    1.29 
  -2 -15  -4    4.26    0.82 
   3 -15   4   12.28    1.68 
  -3 -15  -4   10.92    1.35 
   3 -15   4   12.40    2.00 
   3 -15   4    9.17    1.69 
  -3 -15  -4   10.17    1.36 
  -3 -15  -4    9.55    1.58 
   3 -15   4   10.86    1.44 
  -4 -15  -4   14.13    1.63 
   4 -15   4   16.16    2.03 
  -4 -15  -4   14.66    1.63 
  -4 -15  -4   11.14    1.85 
   4 -15   4   14.28    2.23 
   4 -15   4   11.42    1.70 
   4 -15   4   15.01    2.06 
  -5 -15  -4    4.14    0.73 
   5 -15   4    5.37    1.43 
  -5 -15  -4    4.50    0.69 
   5 -15   4    3.63    0.84 
   5 -15   4    4.60    1.09 
   5 -15   4    4.92    1.01 
   6 -15   4   -0.37    0.69 
  -6 -15  -4    0.42    0.32 
   6 -15   4   -0.09    0.56 
  -6 -15  -4   -0.04    0.38 
   6 -15   4   -0.50    0.52 
   6 -15   4   -0.07    0.52 
  -7 -15  -4    2.30    0.42 
  -7 -15  -4    2.08    0.53 
   7 -15   4    3.22    0.90 
   7 -15   4    1.66    0.67 
   7 -15   4    1.63    0.58 
   7 -15   4    2.35    0.85 
  -8 -15  -4    1.64    0.36 
   8 -15   4    2.63    0.81 
   8 -15   4    1.91    0.61 
  -8 -15  -4    1.68    0.46 
  -9 -15  -4    0.72    0.35 
   9 -15   4    1.78    0.65 
  -9 -15  -4    1.35    0.30 
   9 -15   4    1.28    0.47 
  -9  15  -4    1.02    0.42 
   9 -16  -4    0.01    0.14 
  -8 -16   4    0.18    0.36 
  -8 -16   4    0.13    0.23 
   8 -16  -4    0.05    0.35 
  -7 -16   4    1.78    0.50 
  -7 -16   4    1.26    0.35 
   7 -16  -4    0.90    0.64 
   7 -16  -4    0.61    0.42 
   6 -16  -4    0.74    0.70 
  -6 -16   4    1.81    0.56 
   6 -16  -4    1.20    0.51 
  -6 -16   4    1.83    0.41 
   6 -16  -4    1.47    0.56 
  -5 -16   4    2.74    0.67 
  -5 -16   4    2.62    0.48 
   5 -16  -4    3.44    0.74 
   5 -16  -4    1.59    0.60 
   4 -16  -4    0.87    0.51 
  -4 -16   4    1.11    0.39 
   4 -16  -4    1.19    0.62 
  -4 -16   4    1.12    0.56 
  -3 -16   4    2.56    0.65 
   3 -16  -4    0.57    0.71 
   3 -16  -4    1.68    0.62 
   3 -16  -4    2.71    0.70 
   2 -16  -4    1.33    0.55 
  -2 -16   4    1.00    0.57 
  -1 -16   4    2.33    0.66 
   1 -16  -4    2.54    0.70 
   0 -16   4    5.00    0.89 
   1 -16   4    5.62    1.00 
   1 -16   4    7.53    1.32 
  -1 -16  -4    6.98    0.98 
  -2 -16  -4    0.43    0.57 
   2 -16   4    0.91    0.82 
   2 -16   4    0.63    0.71 
  -2 -16  -4    1.09    0.50 
   2 -16   4    0.26    0.58 
   2 -16   4    0.05    0.88 
   3 -16   4   -0.51    0.79 
   3 -16   4    0.27    0.65 
   3 -16   4    0.08    0.59 
  -3 -16  -4    0.13    0.43 
  -3 -16  -4    0.61    0.40 
   3 -16   4    0.97    0.79 
  -3 -16  -4   -0.09    0.53 
   4 -16   4    1.49    0.84 
   4 -16   4    2.66    0.73 
  -4 -16  -4    2.13    0.52 
   4 -16   4    1.45    0.73 
  -4 -16  -4    2.20    0.50 
   4 -16   4    2.51    1.11 
   5 -16   4    1.10    0.63 
  -5 -16  -4    0.78    0.34 
   5 -16   4   -0.47    0.66 
  -5 -16  -4    0.69    0.43 
   5 -16   4    0.92    0.57 
   5 -16   4    0.76    0.65 
   6 -16   4    1.42    0.80 
   6 -16   4    1.88    0.57 
  -6 -16  -4    1.91    0.48 
  -6 -16  -4    1.62    0.39 
   6 -16   4    0.43    0.66 
   6 -16   4    1.67    0.66 
  -7 -16  -4    5.42    0.72 
   7 -16   4    5.21    1.09 
   7 -16   4    4.98    0.79 
  -7 -16  -4    6.27    0.81 
   7 -16   4    5.05    0.94 
   8 -16   4    0.35    0.42 
  -8 -16  -4    0.10    0.24 
  -8 -16  -4   -0.18    0.29 
   8 -16   4    1.97    0.64 
   9 -16   4    1.61    0.54 
  -9 -16  -4    1.56    0.34 
  -8 -17   4    2.38    0.35 
   7 -17  -4    0.17    0.21 
  -7 -17   4    2.41    0.32 
   6 -17  -4    0.71    0.43 
  -6 -17   4    0.74    0.43 
  -6 -17   4    1.37    0.35 
   5 -17  -4    0.70    0.45 
  -5 -17   4    0.71    0.34 
  -5 -17   4    0.39    0.45 
  -4 -17   4    3.25    0.66 
   4 -17  -4    2.25    0.65 
   4 -17  -4    3.49    0.72 
  -3 -17   4    0.95    0.51 
   3 -17  -4    2.21    0.62 
   3 -17  -4    0.29    0.25 
  -2 -17   4    0.20    0.49 
   2 -17  -4    0.62    0.50 
   1 -17  -4    2.75    0.69 
  -1 -17   4    2.57    0.64 
   0 -17   4    1.22    0.56 
  -1 -17  -4    0.57    0.45 
   1 -17   4   -0.88    0.73 
   1 -17   4    0.30    0.53 
   2 -17   4    0.79    0.58 
   2 -17   4    1.19    1.00 
   2 -17   4    0.39    0.78 
  -2 -17  -4    0.63    0.43 
   3 -17   4    0.73    0.65 
  -3 -17  -4    0.29    0.40 
   3 -17   4    0.58    0.63 
   3 -17   4    0.39    0.70 
   3 -17   4    0.97    0.61 
  -3 -17  -4    1.23    0.40 
  -4 -17  -4    1.11    0.37 
   4 -17   4    0.07    0.69 
   4 -17   4    0.97    0.57 
   4 -17   4    1.63    0.66 
   4 -17   4   -0.07    0.56 
  -4 -17  -4    0.47    0.40 
   5 -17   4    0.52    0.56 
   5 -17   4    1.19    0.53 
  -5 -17  -4    1.65    0.43 
   5 -17   4    0.49    0.63 
   5 -17   4   -0.28    0.65 
  -5 -17  -4    0.78    0.32 
   6 -17   4    0.56    0.50 
  -6 -17  -4    1.46    0.41 
   6 -17   4    1.41    0.48 
   6 -17   4    1.21    0.74 
  -6 -17  -4    1.14    0.33 
   6 -17   4    0.04    0.55 
   7 -17   4    0.13    0.42 
  -7 -17  -4    0.11    0.23 
   7 -17   4   -0.31    0.58 
  -7 -17  -4   -0.07    0.30 
   8 -17   4    0.27    0.46 
  -8 -17  -4    0.68    0.28 
  -8 -17  -4    0.34    0.21 
  -6 -18   4    2.93    0.43 
   5 -18  -4    0.05    0.38 
   4 -18  -4    0.30    0.21 
   3 -18  -4   -0.55    0.43 
   2 -18  -4    1.20    0.53 
  -2 -18  -4    3.75    0.67 
   2 -18   4    5.63    1.04 
   3 -18   4    1.62    0.67 
   3 -18   4    1.47    0.75 
  -3 -18  -4    2.65    0.51 
   3 -18   4    1.89    0.78 
   4 -18   4    0.68    0.65 
   4 -18   4    0.76    0.69 
  -4 -18  -4    0.11    0.36 
   4 -18   4    0.69    0.55 
  -4 -18  -4    1.18    0.34 
   5 -18   4    2.19    0.62 
  -5 -18  -4    1.59    0.37 
  -5 -18  -4    1.65    0.41 
   5 -18   4    2.98    0.80 
  -6 -18  -4    0.72    0.27 
   6 -18   4    0.83    0.65 
  -6 -18  -4    0.52    0.31 
   6 -18   4    0.44    0.42 
   7 -18   4   -0.02    0.47 
  -7 -18  -4    0.04    0.24 
  -7 -18  -4    0.23    0.20 
   2 -19   4    0.91    0.66 
   3 -19   4    1.25    0.68 
  -3 -19  -4    0.31    0.34 
  -4 -19  -4    2.72    0.42 
  -4 -19  -4    2.26    0.46 
   4 -19   4    2.07    0.61 
   4 -19   4    2.64    0.75 
  -5 -19  -4    1.01    0.29 
   5 -19   4    2.05    0.68 
   5 -19   4    1.23    0.47 
  -5 -19  -4    1.22    0.34 
   6 -19   4    0.79    0.49 
 -13   0   5    0.95    0.27 
 -13   0   5    0.46    0.33 
  13   0  -5    0.55    0.32 
  13   0  -5    1.23    0.46 
 -12   0   5    0.07    0.30 
  12   0  -5    0.99    0.56 
 -12   0   5    0.22    0.39 
  12   0  -5    0.19    0.41 
 -11   0   5   -0.52    0.41 
 -11   0   5   -0.29    0.33 
  11   0  -5   -0.51    0.57 
 -10   0   5    1.69    0.62 
  10   0  -5    3.07    0.77 
 -10   0   5    4.06    1.18 
  -9   0   5    0.67    0.74 
  -9   0   5    1.06    0.54 
   9   0  -5    0.99    0.58 
   9   0  -5    0.10    0.56 
  -9   0   5    0.91    0.85 
  -8   0   5    2.06    1.00 
   8   0  -5    1.27    0.52 
   7   0  -5    0.64    0.43 
   7   0  -5   -0.07    0.34 
  -7   0   5    0.85    0.74 
  -6   0   5    3.71    0.75 
   6   0  -5    1.44    0.42 
   6   0  -5    1.18    0.47 
  -5   0   5   11.40    1.58 
  -5   0   5   14.15    2.12 
   5   0  -5   13.44    1.63 
   4   0  -5   10.57    1.38 
  -4   0   5    8.68    1.52 
  -4   0   5    9.29    1.22 
   4   0  -5   10.61    1.30 
   3   0  -5   10.65    1.34 
  -3   0   5   10.09    1.33 
   3   0  -5   12.10    1.41 
   2   0  -5   16.81    1.91 
   2   0  -5   16.53    1.99 
  -2   0   5   17.32    1.99 
  -1   0   5   39.59    3.13 
   1   0  -5   36.95    4.13 
   0   0   5    6.08    0.53 
   0   0  -5    4.85    0.73 
   0   0   5    4.94    0.43 
   1   0   5   59.64    5.10 
   1   0   5   64.09    4.44 
  -1   0  -5   67.09    6.72 
  -2   0  -5    3.80    0.57 
  -3   0  -5  140.58   14.85 
  -3   0  -5  139.29    9.87 
  -3   0  -5  144.43   13.46 
  -4   0  -5   42.08    4.84 
  -4   0  -5   48.60    4.41 
  -5   0  -5   13.35    1.26 
  -5   0  -5    9.30    1.35 
  -6   0  -5    0.04    0.35 
  -6   0  -5    0.22    0.29 
   7   0   5    1.40    1.00 
  -7   0  -5    1.09    0.42 
  -7   0  -5    1.38    0.54 
   8   0   5    2.09    1.12 
  -9   0  -5   25.57    2.98 
   9   0   5   27.80    3.84 
   9   0   5   27.33    2.87 
  10   0   5   51.26    4.90 
 -10   0  -5   48.82    5.21 
  10   0   5   43.34    6.16 
  11   0   5    0.98    0.90 
 -11   0  -5    0.96    0.54 
  11   0   5    2.23    0.53 
  12   0   5    0.34    0.72 
  12   0   5    1.20    0.56 
 -12   0  -5    1.27    0.37 
 -12   0  -5    0.43    0.44 
  13   0   5    0.45    0.39 
 -13   0  -5    0.08    0.22 
 -13   0  -5    0.42    0.31 
  13  -1  -5    0.89    0.46 
 -13  -1   5    0.25    0.32 
 -13  -1   5    0.86    0.26 
  13  -1  -5    0.53    0.29 
  13   1  -5    0.17    0.43 
 -13   1   5    0.55    0.27 
 -13   1   5    0.71    0.34 
  13   1  -5    0.52    0.33 
  12  -1  -5   10.28    1.18 
  12  -1  -5   10.00    1.33 
 -12  -1   5    9.93    1.05 
 -12  -1   5   10.61    1.28 
 -12   1   5   11.93    1.26 
  12   1  -5    6.99    1.28 
 -12   1   5    9.62    1.11 
  11  -1  -5    2.56    0.70 
 -11  -1   5    2.07    0.45 
 -11  -1   5    1.59    0.55 
  11   1  -5    1.15    0.65 
 -11   1   5    0.67    0.51 
 -10  -1   5    0.50    0.50 
  10  -1  -5   -0.04    0.63 
 -10  -1   5    0.77    0.41 
  10   1  -5    0.66    0.63 
 -10   1   5    3.63    0.97 
 -10   1   5    0.03    0.65 
 -10   1   5    0.35    0.52 
  10   1  -5    0.84    0.62 
  -9  -1   5    1.89    0.97 
   9  -1  -5    1.06    0.71 
   9  -1  -5    1.97    0.71 
  -9  -1   5    2.70    0.66 
  -9   1   5    3.45    0.87 
   9   1  -5    2.34    0.70 
   9   1  -5    2.18    0.70 
  -9   1   5    0.89    1.00 
   8  -1  -5    9.26    1.70 
  -8  -1   5   15.21    2.33 
   8   1  -5   14.84    1.53 
   8   1  -5   14.89    1.85 
  -8   1   5   14.34    2.30 
   7  -1  -5    0.80    0.45 
  -7  -1   5    1.86    0.93 
   7   1  -5    0.81    0.51 
  -7   1   5    1.44    0.87 
   7   1  -5    2.16    0.49 
   6  -1  -5   45.53    5.48 
  -6  -1   5   56.59    6.94 
   6   1  -5   46.79    4.77 
  -6   1   5   50.48    6.89 
   6   1  -5   45.72    5.49 
   5  -1  -5   44.17    4.93 
  -5  -1   5   37.07    6.18 
  -5   1   5   45.75    4.94 
   5   1  -5   47.67    4.95 
  -5   1   5   39.71    6.17 
   4  -1  -5   36.08    4.30 
  -4  -1   5   32.76    5.15 
   4  -1  -5   39.36    4.13 
  -4   1   5   30.78    5.15 
  -4   1   5   36.43    4.12 
   4   1  -5   39.24    4.13 
   3  -1  -5   33.02    3.56 
   3  -1  -5   33.08    3.72 
   3   1  -5   31.84    3.72 
  -3   1   5   32.45    3.72 
   2  -1  -5   36.23    4.24 
   2  -1  -5   37.32    4.06 
  -2   1   5   39.53    4.26 
   2   1  -5   37.61    4.03 
   2   1  -5   36.83    4.24 
   1  -1  -5   29.69    3.38 
  -1  -1   5   33.35    2.56 
   1   1  -5   31.02    3.36 
  -1   1   5   30.35    2.53 
   0  -1   5    3.81    0.39 
   0  -1   5    4.71    0.52 
   0  -1  -5    4.54    0.73 
   0   1   5    6.43    0.49 
   0   1  -5    6.19    0.72 
   0   1   5    6.80    0.46 
   1  -1   5   12.14    1.33 
  -1  -1  -5   13.61    1.79 
   1   1   5   19.57    1.17 
  -1   1  -5   18.19    1.79 
  -2  -1  -5   25.84    2.59 
  -2  -1  -5   23.40    2.37 
  -2   1  -5   22.34    2.56 
   2   1   5   22.52    1.69 
  -3  -1  -5   31.61    3.05 
  -3  -1  -5   31.18    3.36 
  -3   1  -5   31.22    3.35 
  -3   1  -5   29.77    2.20 
  -4  -1  -5   51.99    5.30 
  -4  -1  -5   56.17    4.80 
  -4   1  -5   49.03    4.82 
  -4   1  -5   41.53    5.27 
  -5  -1  -5    1.78    0.46 
  -5  -1  -5    2.58    0.43 
  -5   1  -5    2.16    0.46 
  -5   1  -5    1.48    0.43 
  -6  -1  -5   20.87    2.27 
  -6  -1  -5   20.43    2.04 
  -6   1  -5   16.26    2.23 
  -6   1  -5   21.23    2.04 
  -7  -1  -5    7.54    1.05 
   7  -1   5    7.62    1.63 
  -7   1  -5    7.50    1.19 
   7   1   5    9.96    1.70 
  -7   1  -5   10.41    1.10 
  -8  -1  -5   21.60    2.56 
   8  -1   5   27.32    3.58 
   8  -1   5   25.87    2.66 
   8   1   5   26.40    3.56 
   9  -1   5    1.27    0.60 
   9  -1   5    2.36    1.19 
  -9   1  -5    3.14    0.69 
   9   1   5    2.12    0.71 
   9   1   5    4.28    1.32 
 -10  -1  -5    1.15    0.43 
  10  -1   5    1.34    0.52 
  10  -1   5    1.82    1.12 
 -10   1  -5   -0.26    0.51 
  10   1   5    0.77    0.57 
  10   1   5   -0.33    0.96 
  11  -1   5    0.59    0.84 
 -11  -1  -5   -0.18    0.33 
 -11  -1  -5   -0.05    0.48 
  11  -1   5    0.86    0.62 
  11   1   5   -1.27    0.87 
  11   1   5    1.18    0.52 
 -11   1  -5    0.63    0.49 
  12  -1   5    1.54    0.79 
  12  -1   5    1.61    0.60 
 -12  -1  -5    2.19    0.50 
 -12  -1  -5    2.11    0.40 
 -12   1  -5    1.89    0.43 
 -12   1  -5    1.85    0.53 
  12   1   5    1.12    0.79 
  13  -1   5    0.21    0.35 
 -13  -1  -5   -0.04    0.19 
  13   1   5    0.24    0.41 
 -13   1  -5    0.06    0.23 
 -13   1  -5    0.37    0.31 
 -13  -2   5   -0.23    0.18 
 -13  -2   5   -0.03    0.31 
  13  -2  -5    0.18    0.26 
  13   2  -5   -0.80    0.37 
 -13   2   5    0.02    0.25 
 -12  -2   5    0.58    0.41 
  12  -2  -5    0.58    0.39 
  12  -2  -5    1.47    0.59 
 -12  -2   5    0.83    0.31 
  12   2  -5   -0.21    0.52 
  11  -2  -5    1.18    0.64 
 -11  -2   5    0.67    0.48 
 -11  -2   5    0.34    0.33 
  11  -2  -5    0.45    0.45 
 -11   2   5   -0.02    0.45 
  11   2  -5    0.61    0.58 
 -10  -2   5    2.68    0.67 
  10  -2  -5    2.30    0.78 
 -10  -2   5    4.00    0.58 
  10  -2  -5    3.49    0.71 
  10   2  -5    2.22    0.75 
 -10   2   5    3.30    1.07 
  10   2  -5    2.69    0.77 
 -10   2   5    4.13    0.94 
  -9  -2   5    5.23    0.68 
   9  -2  -5    3.31    0.84 
  -9  -2   5    2.92    0.74 
   9   2  -5    3.73    0.83 
  -9   2   5    4.07    0.94 
   9   2  -5    3.85    0.69 
   9   2  -5    3.81    0.86 
  -9   2   5    3.92    1.22 
   8  -2  -5   -0.02    0.49 
   8   2  -5   -0.12    0.50 
  -8   2   5   -1.43    0.78 
   8   2  -5    0.11    0.46 
   7  -2  -5    2.77    0.68 
  -7  -2   5    4.03    1.08 
  -7   2   5    3.12    1.00 
  -6  -2   5   15.12    2.17 
   6  -2  -5   11.91    1.69 
  -6   2   5   12.43    2.08 
   5  -2  -5   17.55    2.21 
   5  -2  -5   16.81    2.30 
  -5   2   5   20.22    2.78 
  -5   2   5   18.67    2.21 
   4  -2  -5   25.03    2.92 
   4  -2  -5   22.51    2.78 
   4  -2  -5   22.95    2.69 
  -4   2   5   25.36    3.48 
  -4   2   5   23.00    2.77 
   3  -2  -5   43.53    4.81 
   3  -2  -5   45.85    5.27 
   3  -2  -5   43.53    5.02 
  -3   2   5   44.82    5.04 
   2  -2  -5   23.46    3.14 
   2  -2  -5   23.93    3.00 
  -2  -2   5   24.76    2.18 
   2  -2  -5   25.45    2.91 
   2   2  -5   27.96    3.01 
   2   2  -5   30.07    2.85 
  -2   2   5   27.51    3.02 
   1  -2  -5   41.48    4.78 
  -1  -2   5   43.46    3.62 
   1   2  -5   45.88    4.72 
  -1   2   5   45.96    5.00 
   0  -2  -5   32.93    3.44 
   0  -2   5   33.33    2.60 
   0   2  -5   31.33    3.38 
   0   2   5   29.07    3.57 
  -1  -2  -5    0.63    0.31 
  -1  -2  -5    0.14    0.29 
   1  -2   5    0.26    0.22 
   1   2   5    0.81    0.17 
  -1   2  -5    1.23    0.28 
  -2  -2  -5   35.55    3.63 
  -2  -2  -5   31.25    3.26 
  -2   2  -5   33.26    3.58 
  -3  -2  -5   17.67    1.74 
  -3  -2  -5   17.56    1.93 
  -3   2  -5   15.32    1.88 
  -4  -2  -5   20.23    2.23 
  -4  -2  -5   21.24    2.00 
  -4   2  -5   18.84    2.20 
  -4   2  -5   17.62    2.09 
  -5  -2  -5    2.99    0.48 
  -5  -2  -5    1.96    0.53 
  -5   2  -5    1.80    0.49 
  -5   2  -5    3.52    0.55 
  -6  -2  -5    9.99    1.44 
  -6  -2  -5   10.63    1.29 
  -6   2  -5   13.75    1.30 
  -6   2  -5   10.45    1.43 
  -7  -2  -5    1.66    0.43 
   7  -2   5    0.50    0.46 
   7  -2   5    0.40    0.94 
   7   2   5    0.68    0.98 
  -7   2  -5    1.61    0.52 
   8  -2   5    3.57    0.70 
  -8  -2  -5    3.93    0.74 
   8  -2   5    4.70    1.32 
   8   2   5    6.44    1.44 
  -9  -2  -5   49.72    4.76 
   9  -2   5   52.62    5.05 
   9  -2   5   55.47    6.49 
   9   2   5   51.30    6.46 
   9   2   5   49.44    5.11 
  -9   2  -5   47.46    5.43 
  10  -2   5    4.05    1.27 
  10  -2   5    1.98    0.44 
 -10  -2  -5    1.25    0.42 
  10  -2   5    1.26    0.71 
 -10   2  -5    0.86    0.57 
  10   2   5    0.66    1.05 
  10   2   5    0.99    0.61 
 -11  -2  -5    3.74    0.56 
  11  -2   5    3.59    0.78 
  11  -2   5    2.70    1.03 
 -11   2  -5    3.63    0.72 
  11   2   5    2.38    1.15 
  11   2   5    4.05    0.74 
  12  -2   5    3.06    0.70 
 -12  -2  -5    3.26    0.50 
  12  -2   5    2.56    0.91 
 -12   2  -5    3.54    0.65 
  12   2   5    4.89    0.64 
  13  -2   5   -0.22    0.31 
 -13  -2  -5    0.17    0.17 
 -13   2  -5   -0.08    0.24 
 -13   2  -5    0.14    0.30 
  13  -3  -5    0.21    0.24 
 -13  -3   5    0.33    0.32 
  13   3  -5    0.38    0.41 
  12  -3  -5    0.61    0.57 
  12  -3  -5    0.46    0.34 
 -12  -3   5    0.51    0.27 
 -12  -3   5    0.18    0.39 
  12   3  -5   -0.01    0.50 
  11  -3  -5    0.58    0.62 
 -11  -3   5    0.65    0.32 
 -11  -3   5    1.19    0.50 
  11  -3  -5    0.47    0.42 
 -11   3   5    0.22    0.62 
  11   3  -5    0.43    0.55 
  10  -3  -5   17.86    1.84 
  10  -3  -5   17.66    2.15 
 -10  -3   5   17.70    2.04 
 -10  -3   5   16.79    1.74 
 -10   3   5   17.99    2.29 
  10   3  -5   19.32    1.91 
 -10   3   5   19.38    2.81 
  10   3  -5   11.26    2.16 
  10   3  -5   18.86    2.10 
  -9  -3   5    5.88    0.77 
   9  -3  -5    6.35    0.93 
   9  -3  -5    5.24    1.10 
  -9  -3   5    6.16    0.96 
   9  -3  -5    4.76    1.01 
   9   3  -5    4.78    1.00 
  -9   3   5    6.05    1.14 
   9   3  -5    6.30    0.88 
  -9   3   5    5.10    1.36 
   8  -3  -5    6.43    1.09 
  -8   3   5    6.69    1.44 
   8   3  -5    6.21    1.12 
   7  -3  -5    0.30    0.40 
  -7   3   5   -0.70    0.71 
   6  -3  -5    1.95    0.53 
  -6   3   5    1.78    0.50 
  -6   3   5    1.49    0.73 
   5  -3  -5    5.95    0.97 
   5  -3  -5    6.11    1.07 
  -5   3   5    7.37    1.22 
  -5   3   5    6.08    0.95 
   4  -3  -5   11.09    1.44 
   4  -3  -5   10.19    1.41 
   4  -3  -5   10.88    1.54 
  -4   3   5    9.93    1.41 
   3  -3  -5    0.81    0.40 
   3  -3  -5    1.46    0.46 
   3  -3  -5    1.60    0.47 
  -3   3   5    1.17    0.41 
  -2  -3   5   22.43    1.86 
   2  -3  -5   22.35    2.49 
   2  -3  -5   20.43    2.55 
   2  -3  -5   20.85    2.68 
  -2   3   5   23.54    2.56 
   1  -3  -5  101.15   10.72 
   1  -3  -5   91.10    8.76 
   1  -3  -5   83.35   10.21 
   1  -3  -5   95.42    9.76 
  -1  -3   5   99.84    7.43 
  -1   3   5   86.32   10.24 
   1   3  -5   89.27    9.66 
   0  -3  -5  130.59   13.29 
   0  -3  -5  130.38   11.97 
   0  -3   5  133.58   10.12 
   0  -3  -5  110.37   13.94 
   0   3  -5  125.59   13.20 
   0   3   5  126.18   13.98 
  -1  -3  -5   71.48    6.13 
   1  -3   5   68.37    5.18 
  -1  -3  -5   60.98    7.13 
  -1  -3  -5   55.34    6.79 
  -1   3  -5   64.45    6.74 
   1   3   5   61.75    7.13 
  -2  -3  -5   53.48    5.01 
  -2  -3  -5   50.49    5.58 
  -2  -3  -5   49.87    5.84 
  -2   3  -5   53.72    5.54 
  -3  -3  -5   12.82    1.28 
  -3  -3  -5   11.05    1.47 
  -3  -3  -5   12.03    1.50 
  -3   3  -5   11.16    1.39 
  -4  -3  -5   20.92    2.42 
  -4  -3  -5   22.83    2.34 
  -4  -3  -5   21.84    2.06 
  -4   3  -5   16.48    2.25 
  -5  -3  -5   14.71    1.54 
  -5  -3  -5   11.96    1.74 
  -5   3  -5   15.41    1.64 
  -5   3  -5   15.41    1.72 
  -6  -3  -5    1.38    0.41 
  -6  -3  -5    1.35    0.54 
  -6   3  -5    1.32    0.49 
  -6   3  -5    2.11    0.45 
   7  -3   5    0.10    0.96 
  -7  -3  -5    2.03    0.49 
   7  -3   5    2.03    0.50 
  -7   3  -5    2.02    0.61 
   8  -3   5   10.27    1.31 
  -8  -3  -5   11.40    1.41 
   8  -3   5   12.19    2.07 
   8   3   5   15.31    2.19 
   9  -3   5    1.35    0.38 
   9  -3   5    1.25    1.07 
   9  -3   5    0.17    0.61 
  -9  -3  -5    0.75    0.38 
   9   3   5   -0.51    0.90 
  -9   3  -5    0.56    0.59 
 -10  -3  -5   13.44    1.37 
  10  -3   5   11.94    1.59 
  10  -3   5   15.90    2.39 
 -10   3  -5   12.41    1.64 
  10   3   5   11.95    1.61 
  10   3   5   13.87    2.22 
  11  -3   5    5.85    0.92 
 -11  -3  -5    4.96    0.63 
  11  -3   5    3.92    1.12 
 -11   3  -5    4.25    0.79 
  11   3   5    5.15    1.28 
  11   3   5    3.77    0.81 
 -12  -3  -5    0.71    0.26 
  12  -3   5    1.38    0.74 
  12  -3   5    0.69    0.48 
 -12   3  -5   -0.12    0.38 
  13  -3   5    1.66    0.36 
 -13   3  -5    1.69    0.34 
 -13   3  -5    1.56    0.39 
 -13  -4   5    1.19    0.37 
  13   4  -5    1.20    0.44 
 -12  -4   5    5.47    0.81 
  12  -4  -5    6.18    0.69 
 -12  -4   5    5.20    0.60 
  12   4  -5    3.71    0.83 
  11  -4  -5    2.73    0.76 
  11  -4  -5    1.87    0.49 
 -11  -4   5    3.05    0.46 
 -11  -4   5    3.11    0.64 
 -11   4   5    2.40    0.78 
  11   4  -5    1.93    0.65 
  10  -4  -5    5.32    0.99 
 -10  -4   5    6.98    0.96 
 -10  -4   5    5.55    0.72 
  10  -4  -5    7.13    0.86 
  10   4  -5    5.04    0.94 
 -10   4   5    4.96    1.07 
 -10   4   5    6.99    1.39 
  10   4  -5    2.33    0.89 
   9  -4  -5    6.37    0.88 
   9  -4  -5    4.88    1.04 
  -9  -4   5    8.51    0.84 
   9  -4  -5    5.85    1.13 
  -9  -4   5    6.91    1.02 
   9   4  -5    3.37    1.03 
  -9   4   5    6.39    1.35 
   9   4  -5    5.42    1.01 
  -8  -4   5    4.46    0.63 
  -8   4   5    3.95    1.04 
   7  -4  -5    3.60    0.79 
  -7   4   5    5.13    1.17 
   6  -4  -5   15.85    2.16 
   6  -4  -5   16.88    2.06 
  -6   4   5   14.03    2.07 
  -6   4   5   18.57    2.56 
   5  -4  -5   17.38    2.05 
   5  -4  -5   17.09    1.97 
   5  -4  -5   14.64    2.05 
  -5   4   5   14.18    1.94 
   4  -4  -5   74.28    8.82 
   4  -4  -5   77.53    8.43 
   4  -4  -5   72.80    8.06 
  -4   4   5   75.11    8.45 
   3  -4  -5    4.86    0.78 
   3  -4  -5    5.32    0.88 
  -3  -4   5    5.38    0.58 
   3  -4  -5    4.68    0.82 
  -3   4   5    3.74    0.73 
   2  -4  -5   38.00    3.96 
   2  -4  -5   36.41    4.28 
   2  -4  -5   38.71    4.10 
  -2  -4   5   35.51    2.97 
  -2   4   5   31.72    4.08 
   1  -4  -5   76.15    8.59 
   1  -4  -5   77.59    9.41 
  -1  -4   5   80.77    6.53 
   1  -4  -5   68.61    8.98 
  -1   4   5   90.23    9.03 
   1   4  -5   89.24    8.49 
   0  -4  -5   45.48    6.00 
   0  -4  -5   56.38    6.29 
   0  -4  -5   52.65    5.76 
   0  -4   5   51.99    4.36 
   0  -4  -5   59.01    5.13 
   0   4   5   53.51    6.00 
   0   4  -5   54.30    5.66 
  -1  -4  -5   13.36    1.58 
  -1  -4  -5   12.50    1.64 
   1  -4   5   12.27    1.16 
  -1  -4  -5   12.04    1.34 
  -1  -4  -5   12.61    1.67 
   1   4   5   13.04    1.55 
  -1   4  -5   14.27    1.48 
  -2  -4  -5    2.88    0.41 
  -2  -4  -5    1.95    0.51 
  -2  -4  -5    2.25    0.51 
  -2   4  -5    2.33    0.46 
  -3  -4  -5   90.48    8.49 
  -3  -4  -5   75.86    9.43 
  -3  -4  -5   87.02    9.91 
  -3   4  -5  101.68    9.42 
  -4  -4  -5   13.75    1.39 
  -4  -4  -5   10.50    1.58 
  -4  -4  -5   14.25    1.68 
  -4   4  -5   12.29    1.53 
  -5  -4  -5   21.61    2.46 
   5  -4   5   17.44    2.09 
  -5  -4  -5   19.94    2.39 
  -5  -4  -5   22.47    2.10 
  -5   4  -5   19.16    2.18 
  -5   4  -5   21.56    2.34 
  -6  -4  -5    2.03    0.45 
   6  -4   5    2.12    0.91 
   6  -4   5    1.38    0.40 
  -6   4  -5    1.29    0.48 
   7  -4   5    3.61    0.56 
  -7  -4  -5    4.15    0.68 
   7  -4   5    3.53    1.11 
   8  -4   5   19.63    2.27 
  -8  -4  -5   21.62    2.06 
   8  -4   5   22.34    3.15 
  -8  -4  -5   19.69    2.25 
   8   4   5   21.19    3.09 
  -9  -4  -5    0.10    0.29 
   9  -4   5    0.28    0.55 
   9  -4   5    0.56    1.02 
   9   4   5    0.01    1.05 
  -9   4  -5   -0.16    0.59 
  10  -4   5   12.93    2.10 
  10  -4   5    9.19    1.37 
 -10  -4  -5   11.19    1.16 
  10   4   5   10.06    1.40 
 -10   4  -5   11.27    1.43 
  10   4   5   10.85    1.94 
  11  -4   5    0.22    0.49 
 -11  -4  -5    0.92    0.30 
  11  -4   5    1.00    0.84 
 -11   4  -5    0.36    0.47 
  11   4   5   -0.09    0.54 
  12  -4   5    0.45    0.39 
  12  -4   5   -0.07    0.63 
 -12  -4  -5    0.12    0.19 
 -12   4  -5    0.65    0.41 
 -13   4  -5    0.44    0.31 
 -13  -5   5    2.15    0.43 
  13   5  -5    2.11    0.47 
 -12  -5   5    1.73    0.49 
  12  -5  -5    2.13    0.36 
  12   5  -5    1.28    0.53 
 -12   5   5    2.19    0.61 
 -11  -5   5    6.51    1.04 
  11  -5  -5    8.30    0.93 
  11  -5  -5    7.03    1.13 
 -11  -5   5    7.99    0.82 
  11   5  -5    7.20    1.10 
 -11   5   5    8.15    1.24 
  10  -5  -5    5.53    0.93 
 -10  -5   5    5.50    0.92 
  10  -5  -5    5.56    1.03 
  10  -5  -5    5.02    0.75 
 -10  -5   5    5.38    0.69 
 -10   5   5    6.84    1.43 
 -10   5   5    4.81    1.03 
  10   5  -5    3.84    1.01 
  10   5  -5    6.24    0.96 
  -9  -5   5    2.65    0.65 
   9  -5  -5    2.62    0.79 
   9  -5  -5    2.62    0.52 
  -9  -5   5    2.11    0.45 
   9  -5  -5    0.47    0.56 
  -9   5   5    3.19    1.06 
   9   5  -5    2.72    0.75 
  -8  -5   5    4.39    0.83 
   8  -5  -5    4.76    1.01 
  -8  -5   5    3.24    0.71 
  -8  -5   5    5.00    0.64 
   8  -5  -5    4.32    0.70 
  -8   5   5    4.23    1.07 
   8   5  -5    4.37    0.90 
   7  -5  -5    2.68    0.76 
  -7   5   5    3.89    1.06 
   6  -5  -5   44.41    4.63 
   6  -5  -5   38.57    4.82 
  -6   5   5   36.49    4.61 
   5  -5  -5   30.93    3.45 
   5  -5  -5   31.36    3.62 
   5  -5  -5   29.96    3.37 
  -5   5   5   25.34    3.42 
   4  -5  -5   43.48    5.56 
  -4  -5   5   46.00    3.86 
   4  -5  -5   48.47    5.33 
   4  -5  -5   46.99    5.14 
  -4   5   5   48.30    5.34 
   3  -5  -5   53.82    6.07 
  -3  -5   5   49.49    4.20 
   3  -5  -5   51.23    5.79 
   3  -5  -5   51.97    5.58 
  -3   5   5   49.15    5.80 
  -2  -5   5    2.37    0.40 
   2  -5  -5    2.42    0.55 
   2  -5  -5    3.30    0.67 
   2  -5  -5    3.07    0.63 
  -1  -5   5   21.22    1.72 
   1  -5  -5   20.56    2.31 
   1  -5  -5   18.30    2.36 
   1  -5  -5   20.24    2.47 
  -1   5   5   19.03    2.33 
   0  -5  -5   69.69    8.30 
   0  -5  -5   75.79    7.95 
   0  -5  -5   76.54    7.09 
   0  -5  -5   74.50    8.69 
   0  -5   5   75.02    6.04 
   0   5   5   74.39    8.31 
   0   5  -5   73.92    7.83 
  -1  -5  -5   15.27    1.95 
   1  -5   5   13.79    1.36 
  -1  -5  -5   14.75    1.83 
  -1  -5  -5   13.82    1.91 
  -1  -5  -5   16.60    1.58 
  -1   5  -5   16.26    1.74 
   1   5   5   15.86    1.83 
  -2  -5  -5    7.11    1.07 
  -2  -5  -5    6.82    1.02 
  -2  -5  -5    4.45    0.94 
  -2  -5  -5    7.30    0.83 
  -2   5  -5    8.92    0.99 
  -3  -5  -5   31.47    3.63 
  -3  -5  -5   34.04    3.10 
  -3  -5  -5   24.51    3.46 
  -3   5  -5   34.83    3.46 
  -4  -5  -5    5.73    1.02 
  -4  -5  -5    6.00    0.85 
  -4  -5  -5    7.47    1.07 
  -4   5  -5    9.14    1.07 
  -5  -5  -5    6.27    1.11 
  -5  -5  -5    9.54    0.98 
  -5  -5  -5    7.24    1.11 
  -5   5  -5    6.03    1.00 
  -5   5  -5    7.09    1.08 
   6  -5   5    2.95    1.01 
  -6  -5  -5    3.46    0.71 
  -6  -5  -5    4.04    0.63 
  -6   5  -5    2.23    0.64 
   7  -5   5    0.44    0.84 
  -7  -5  -5    0.69    0.40 
   8  -5   5    4.72    0.92 
   8  -5   5    6.81    1.03 
   8  -5   5    5.49    1.45 
  -8  -5  -5    5.82    0.73 
   8   5   5    7.60    1.54 
   9  -5   5    2.23    1.09 
   9  -5   5    0.43    0.57 
  -9  -5  -5    1.58    0.37 
   9   5   5    2.48    1.15 
  -9   5  -5    1.46    1.19 
  10  -5   5    2.59    1.03 
 -10  -5  -5    3.29    0.47 
  10  -5   5    1.96    0.67 
  10   5   5    2.47    1.07 
 -10   5  -5    3.34    0.75 
  11  -5   5    4.63    0.73 
 -11  -5  -5    4.08    0.53 
  11  -5   5    5.42    1.22 
  11   5   5    3.94    0.79 
 -11   5  -5    4.51    0.77 
  12  -5   5    2.12    0.36 
  12  -5   5    0.22    0.64 
 -12   5  -5    0.25    0.41 
 -13   5  -5    1.00    0.34 
 -13  -6   5    0.03    0.27 
  13   6  -5   -0.04    0.32 
 -12  -6   5    9.09    1.13 
  12   6  -5    8.23    1.16 
 -12   6   5    8.99    1.25 
  11  -6  -5    1.98    0.38 
 -11  -6   5    1.22    0.52 
  11   6  -5    2.30    0.61 
 -11   6   5    1.76    0.72 
  10  -6  -5    4.13    0.94 
 -10  -6   5    5.31    0.62 
  10  -6  -5    5.31    0.69 
  10  -6  -5    4.02    0.99 
 -10  -6   5    5.43    0.90 
  10   6  -5    6.53    0.96 
 -10   6   5    3.20    0.99 
   9  -6  -5   -0.25    0.49 
  -9  -6   5    1.12    0.56 
   9  -6  -5    0.43    0.70 
  -9  -6   5    1.14    0.36 
  -9  -6   5    1.09    0.43 
   9  -6  -5    1.47    0.41 
  -9  -6   5    1.56    0.59 
  -9   6   5    3.33    0.93 
   9   6  -5    1.92    0.70 
  -8  -6   5    3.83    0.79 
   8  -6  -5    4.39    1.02 
  -8  -6   5    2.27    0.70 
  -8  -6   5    3.62    0.68 
   8  -6  -5    3.21    0.93 
   8  -6  -5    4.14    0.62 
  -8  -6   5    3.82    0.57 
  -8   6   5    4.05    1.05 
   7  -6  -5    3.44    0.89 
   6  -6  -5    5.35    1.10 
   6  -6  -5    5.25    1.07 
   6  -6  -5    5.54    0.99 
   5  -6  -5    0.46    0.49 
   5  -6  -5    0.38    0.52 
   5  -6  -5    0.08    0.40 
  -5  -6   5    0.76    0.37 
  -5   6   5   -0.50    0.39 
  -4  -6   5    3.02    0.45 
   4  -6  -5    2.33    0.66 
   4  -6  -5    2.39    0.68 
   4  -6  -5    2.26    0.59 
  -4   6   5    1.55    0.54 
  -3  -6   5    3.15    0.46 
   3  -6  -5    1.81    0.61 
   3  -6  -5    4.01    0.68 
   3  -6  -5    3.47    0.73 
  -3   6   5    1.66    0.56 
   2  -6  -5   29.69    3.68 
   2  -6  -5   34.03    3.86 
  -2  -6   5   32.52    2.68 
   2  -6  -5   34.82    3.59 
  -2   6   5   28.88    3.67 
  -1  -6   5   32.35    2.53 
   1  -6  -5   29.03    3.46 
   1  -6  -5   30.23    3.62 
   1  -6  -5   28.75    3.35 
  -1   6   5   28.83    3.44 
   0  -6  -5   12.18    1.65 
   0  -6   5   12.81    1.20 
   0  -6  -5   16.75    1.74 
   0  -6  -5   13.18    1.65 
   0   6   5   11.63    1.57 
   0   6  -5   12.06    1.47 
  -1  -6  -5   12.24    1.54 
  -1  -6  -5   10.03    1.42 
  -1  -6  -5    9.38    1.41 
   1  -6   5   10.46    1.06 
  -1  -6  -5   11.19    1.16 
   1   6   5   10.57    1.32 
  -1   6  -5   10.46    1.27 
  -2  -6  -5    5.08    0.91 
  -2  -6  -5    5.98    0.92 
  -2  -6  -5    5.41    0.92 
  -2  -6  -5    6.02    0.74 
  -2   6  -5    5.82    0.84 
  -3  -6  -5    0.24    0.35 
  -3  -6  -5    0.63    0.42 
  -3  -6  -5    0.49    0.31 
  -3   6  -5    0.60    0.36 
  -4  -6  -5   19.51    1.85 
  -4  -6  -5   20.73    2.22 
  -4  -6  -5   11.47    2.08 
  -4   6  -5   18.00    2.06 
  -5  -6  -5    2.58    0.62 
  -5  -6  -5    2.04    0.49 
  -5   6  -5    2.60    0.61 
  -6  -6  -5    3.43    0.72 
  -6  -6  -5    2.62    0.58 
   6  -6   5    1.74    0.91 
  -7  -6  -5    5.71    0.87 
   7  -6   5    7.43    1.42 
   8  -6   5    0.40    0.90 
  -8  -6  -5    0.74    0.29 
   8  -6   5    1.53    0.56 
   8  -6   5   -0.47    0.49 
   9  -6   5   11.13    1.42 
   9  -6   5   11.43    2.11 
  -9  -6  -5   12.42    1.24 
   9   6   5   14.81    2.21 
  -9   6  -5   11.33    2.15 
 -10  -6  -5    1.50    0.30 
  10  -6   5    0.58    0.50 
  10  -6   5    1.18    0.91 
 -10   6  -5    1.08    0.58 
  11  -6   5    3.14    0.55 
  11  -6   5    4.00    0.93 
 -11   6  -5    3.11    0.65 
  11   6   5    3.10    0.73 
 -12   6  -5    1.04    0.42 
 -13   6  -5    0.30    0.28 
 -12  -7   5   -0.02    0.33 
  12   7  -5    0.09    0.41 
 -12   7   5    0.18    0.48 
 -11  -7   5    0.46    0.44 
  11   7  -5    0.34    0.51 
 -11   7   5    0.43    0.62 
  10  -7  -5    2.22    0.38 
  10  -7  -5    1.18    0.55 
 -10  -7   5    1.13    0.43 
 -10  -7   5    1.85    0.59 
  10   7  -5    1.68    0.62 
  -9  -7   5    5.60    0.93 
   9  -7  -5    6.20    0.74 
   9  -7  -5    4.60    1.08 
  -9  -7   5    6.26    0.67 
  -9  -7   5    4.62    0.94 
  -9  -7   5    4.84    0.84 
   9   7  -5    7.78    1.09 
  -8  -7   5    2.26    0.66 
  -8  -7   5    2.57    0.55 
  -8  -7   5    2.24    0.39 
  -8  -7   5    2.03    0.61 
   8  -7  -5    2.55    0.83 
   8  -7  -5    1.32    0.42 
   8  -7  -5    1.27    0.79 
   7  -7  -5    2.83    0.83 
   7  -7  -5    2.04    0.74 
   7  -7  -5    2.44    0.86 
   7  -7  -5    3.63    0.54 
  -7  -7   5    3.81    0.49 
   6  -7  -5    2.44    0.82 
   6  -7  -5    4.36    0.90 
   5  -7  -5   29.38    3.63 
   5  -7  -5   25.89    3.38 
   5  -7  -5   29.98    3.57 
   4  -7  -5    4.55    0.83 
   4  -7  -5    4.99    0.94 
  -4  -7   5    4.29    0.60 
   4  -7  -5    4.30    0.87 
  -4   7   5    2.52    0.68 
   3  -7  -5   -0.29    0.36 
   3  -7  -5    1.11    0.50 
   3  -7  -5    0.30    0.43 
  -3  -7   5    1.33    0.35 
  -3   7   5    0.42    0.37 
   2  -7  -5   39.06    4.43 
   2  -7  -5   38.42    4.29 
   2  -7  -5   39.37    4.64 
  -2  -7   5   40.65    3.23 
  -2   7   5   34.93    4.41 
  -1  -7   5    1.26    0.33 
   1  -7  -5    0.83    0.39 
   1  -7  -5    0.79    0.44 
   1  -7  -5    0.42    0.41 
  -1   7   5    1.15    0.39 
   0  -7  -5   13.34    1.73 
   0  -7  -5   14.41    1.70 
   0  -7   5   11.48    1.23 
   0  -7  -5   10.57    1.65 
   0   7   5   13.94    1.61 
  -1  -7  -5   20.51    1.94 
  -1  -7  -5   17.82    2.25 
  -1  -7  -5   17.53    2.31 
  -1  -7  -5   22.25    2.42 
   1  -7   5   20.45    1.71 
   1   7   5   17.98    2.25 
  -1   7  -5   17.28    2.14 
  -2  -7  -5   23.76    2.35 
  -2  -7  -5   23.59    2.70 
  -2  -7  -5   21.80    2.77 
  -2   7  -5   23.51    2.61 
  -3  -7  -5    0.64    0.49 
  -3  -7  -5    1.61    0.52 
  -3  -7  -5    1.32    0.39 
  -3   7  -5    1.80    0.48 
  -4  -7  -5    1.86    0.54 
  -4  -7  -5    2.34    0.49 
  -4  -7  -5    1.36    0.63 
  -4   7  -5    1.38    0.52 
   5  -7   5   27.47    3.96 
  -5  -7  -5   31.38    3.12 
  -5  -7  -5   34.91    3.67 
  -5   7  -5   29.24    3.48 
   6  -7   5    2.21    0.99 
  -6  -7  -5    2.60    0.69 
  -6  -7  -5    1.32    0.44 
   6  -7   5    1.90    0.89 
   7  -7   5    1.72    0.86 
  -7  -7  -5    2.51    0.39 
   7  -7   5    2.49    1.00 
  -7  -7  -5    1.69    0.51 
   7  -7   5    2.35    0.56 
  -7  -7  -5    2.69    0.69 
   8  -7   5    0.30    0.92 
   8  -7   5    1.07    0.52 
   8  -7   5    1.62    0.59 
  -8  -7  -5    1.46    0.31 
  -9  -7  -5    3.90    0.45 
   9  -7   5    3.88    0.68 
   9  -7   5    1.36    0.99 
  -9   7  -5    3.28    1.36 
  10  -7   5    0.85    0.38 
  10  -7   5    0.97    0.87 
 -10   7  -5    2.35    0.64 
  11  -7   5    1.24    0.74 
 -11   7  -5   -0.26    0.41 
 -12   7  -5    1.42    0.43 
  12   8  -5    0.19    0.39 
 -12   8   5    0.28    0.47 
 -11  -8   5    0.87    0.42 
 -11   8   5   -0.66    0.54 
 -10  -8   5    2.15    0.46 
 -10  -8   5    1.94    0.60 
  10  -8  -5    0.69    0.49 
  10   8  -5    2.71    0.68 
  -9  -8   5    1.97    0.49 
  -9  -8   5    1.86    0.60 
  -9  -8   5    1.81    0.63 
   9  -8  -5    1.05    0.57 
   9   8  -5    1.85    0.68 
  -8  -8   5    0.71    0.58 
  -8  -8   5    0.59    0.43 
   8  -8  -5    0.52    0.64 
  -8  -8   5    1.24    0.56 
   8  -8  -5    0.94    0.83 
  -7  -8   5   24.87    2.96 
   7  -8  -5   25.95    3.21 
   7  -8  -5   26.38    2.50 
  -7  -8   5   27.11    2.95 
   7  -8  -5   26.01    3.11 
   7  -8  -5   22.18    3.31 
   7  -8  -5   29.71    3.46 
  -7  -8   5   27.24    2.90 
   6  -8  -5    4.89    1.04 
   6  -8  -5    4.42    1.03 
   5  -8  -5    6.70    1.24 
   5  -8  -5    7.55    1.25 
   5  -8  -5    5.41    1.12 
   4  -8  -5   36.94    4.35 
   4  -8  -5   35.65    4.41 
  -4  -8   5   36.88    3.02 
   4  -8  -5   36.47    4.14 
   4  -8  -5   35.65    4.05 
  -4   8   5   30.68    4.11 
   3  -8  -5   48.95    5.63 
   3  -8  -5   56.54    6.14 
  -3  -8   5   50.46    4.24 
   3  -8  -5   56.16    5.84 
  -3   8   5   43.64    5.81 
   2  -8  -5   26.57    3.40 
   2  -8  -5   27.20    3.19 
   2  -8  -5   28.93    3.27 
  -2  -8   5   29.42    2.40 
  -2   8   5   25.99    3.24 
   1  -8  -5    8.90    1.45 
  -1  -8   5   11.09    1.04 
   1  -8  -5    8.27    1.33 
   1  -8  -5   10.58    1.39 
  -1   8   5    8.70    1.31 
   0  -8  -5    2.48    0.57 
   0  -8  -5    1.75    0.57 
   0  -8   5    2.23    0.45 
   0  -8  -5    2.44    0.61 
   0   8   5    2.81    0.56 
  -1  -8  -5   28.97    3.09 
   1  -8   5   24.03    2.29 
  -1  -8  -5   26.43    3.16 
  -1  -8  -5   25.65    3.27 
  -1   8  -5   28.06    2.95 
  -2  -8  -5    2.96    0.70 
  -2  -8  -5    3.50    0.57 
  -2  -8  -5    3.10    0.68 
  -2   8  -5    3.16    0.64 
  -3  -8  -5   40.35    4.63 
  -3  -8  -5   39.94    3.94 
  -3  -8  -5   40.58    4.47 
  -3   8  -5   38.88    4.38 
  -4  -8  -5   15.32    1.57 
  -4  -8  -5   13.04    1.91 
  -4   8  -5   14.40    1.86 
  -5  -8  -5   13.52    1.68 
   5  -8   5   13.23    2.03 
  -5  -8  -5   10.53    1.37 
   5  -8   5    9.96    1.80 
   6  -8   5    3.42    1.14 
  -6  -8  -5    4.41    0.87 
  -6  -8  -5    3.33    0.68 
   6  -8   5    4.84    1.14 
   7  -8   5    8.80    1.60 
  -7  -8  -5    5.42    1.14 
  -7  -8  -5    8.08    1.07 
   7  -8   5    7.56    0.92 
   7  -8   5    7.52    1.12 
   7  -8   5    7.50    1.30 
   7  -8   5    6.11    1.41 
  -7  -8  -5    7.80    1.06 
   8  -8   5    5.78    1.38 
   8  -8   5    5.08    0.77 
   8  -8   5    9.45    1.09 
  -8  -8  -5    4.98    0.92 
   9  -8   5    3.61    1.22 
  -9  -8  -5    6.37    0.96 
  -9   8  -5    8.90    1.66 
  10  -8   5    1.97    0.97 
 -10   8  -5    6.41    0.86 
  11  -8   5    0.69    0.67 
 -11   8  -5    0.23    0.43 
 -12   8  -5    0.30    0.36 
 -12  -9   5    0.88    0.33 
 -12   9   5    0.65    0.44 
  12   9  -5    0.44    0.37 
 -11  -9   5    1.12    0.44 
  11   9  -5    1.12    0.49 
 -11   9   5    0.48    0.58 
  10  -9  -5    1.04    0.49 
 -10  -9   5    1.48    0.40 
 -10  -9   5    1.88    0.56 
  10   9  -5    2.02    0.60 
   9  -9  -5   10.58    1.52 
  -9  -9   5    8.53    1.15 
  -9  -9   5    8.21    1.19 
   9  -9  -5   10.71    1.47 
  -9  -9   5    8.51    1.26 
   9   9  -5    9.91    1.34 
   8  -9  -5   -0.18    0.81 
   8  -9  -5   -0.13    0.62 
  -8  -9   5    0.40    0.48 
   8  -9  -5   -0.57    0.60 
  -8  -9   5    0.89    0.42 
  -8  -9   5   -0.09    0.52 
  -7  -9   5   11.82    1.39 
  -7  -9   5   11.12    1.46 
   7  -9  -5   14.76    1.89 
   7  -9  -5   11.21    1.71 
  -7  -9   5   11.76    1.53 
   7  -9  -5    7.84    1.68 
   7  -9  -5    9.97    1.56 
   6  -9  -5    0.71    0.59 
   6  -9  -5    0.17    0.54 
   6  -9  -5    0.20    0.62 
   5  -9  -5   14.10    1.98 
   5  -9  -5   11.77    1.97 
   4  -9  -5   18.39    2.27 
   4  -9  -5   14.92    2.09 
   4  -9  -5   13.61    2.11 
   4  -9  -5   14.67    2.24 
   3  -9  -5    9.82    1.63 
   3  -9  -5   14.11    1.88 
   3  -9  -5   12.22    1.66 
   3  -9  -5   11.64    1.71 
  -3  -9   5   10.95    1.22 
  -3   9   5   10.96    1.61 
  -2  -9   5    1.08    0.43 
   2  -9  -5    1.41    0.52 
   2  -9  -5    0.81    0.49 
   2  -9  -5    1.21    0.57 
  -2   9   5    0.86    0.49 
   1  -9  -5    8.66    1.41 
   1  -9  -5    9.49    1.40 
  -1  -9   5    8.45    0.98 
   1  -9  -5   11.49    1.40 
  -1   9   5    7.24    1.24 
   0  -9  -5   16.51    2.03 
   0  -9   5   14.63    1.49 
   0  -9  -5   14.97    2.01 
   0  -9  -5   16.51    1.97 
   0   9   5   13.98    1.90 
  -1  -9  -5    0.62    0.46 
  -1  -9  -5    0.65    0.42 
   1  -9   5    1.57    0.41 
  -1  -9  -5    0.17    0.44 
  -2  -9  -5   33.01    3.62 
  -2  -9  -5   25.89    3.47 
  -2  -9  -5   33.50    3.05 
  -2   9  -5   28.27    3.38 
  -3  -9  -5   12.70    1.71 
  -3  -9  -5   10.76    1.33 
  -3   9  -5   11.80    1.55 
  -4  -9  -5    8.74    1.30 
  -4  -9  -5   11.42    1.14 
   4  -9   5    5.82    1.46 
  -4   9  -5    5.86    1.16 
   5  -9   5   11.11    1.73 
   5  -9   5    9.44    1.78 
  -5  -9  -5   11.27    1.55 
  -5  -9  -5    8.33    1.20 
   6  -9   5    3.80    1.15 
   6  -9   5    4.00    1.22 
  -6  -9  -5    5.09    0.98 
   6  -9   5    5.43    1.14 
  -6  -9  -5    6.56    0.86 
   7  -9   5    8.51    1.65 
  -7  -9  -5    7.94    1.06 
   7  -9   5    9.27    1.18 
   7  -9   5    5.43    1.42 
   7  -9   5    6.44    1.29 
  -7  -9  -5    7.52    1.08 
  -7  -9  -5    7.91    1.24 
   7  -9   5    6.62    1.32 
   8  -9   5    4.42    0.86 
  -8  -9  -5    6.19    0.81 
   8  -9   5    3.09    1.15 
  -8  -9  -5    5.39    0.84 
   8  -9   5    5.57    1.10 
  -8  -9  -5    3.70    0.88 
  -9  -9  -5   10.19    1.32 
 -10  -9  -5    4.50    0.74 
 -10   9  -5    4.01    0.77 
  11  -9   5    0.48    0.61 
 -11   9  -5    0.34    0.40 
 -12   9  -5    0.52    0.32 
 -12 -10   5    0.31    0.27 
  12  10  -5    0.55    0.34 
 -11 -10   5    0.44    0.38 
 -11 -10   5    0.66    0.27 
 -11  10   5   -0.34    0.51 
  11  10  -5    0.38    0.41 
 -10 -10   5   -0.19    0.40 
  10 -10  -5   -0.08    0.41 
 -10 -10   5   -0.01    0.27 
  10  10  -5    0.36    0.50 
   9 -10  -5    1.28    0.68 
  -9 -10   5    1.56    0.57 
   9 -10  -5    2.45    0.75 
  -9 -10   5    0.78    0.50 
  -9 -10   5    1.63    0.43 
   9  10  -5    1.97    0.66 
   8 -10  -5    0.08    0.64 
  -8 -10   5    0.89    0.53 
  -8 -10   5    0.60    0.40 
   8 -10  -5    0.80    0.71 
  -8 -10   5    0.27    0.55 
   8 -10  -5    0.66    0.77 
   7 -10  -5   31.23    3.21 
   7 -10  -5   27.60    3.27 
  -7 -10   5   26.81    2.97 
  -7 -10   5   25.95    2.93 
   7 -10  -5   26.65    3.49 
   7 -10  -5   21.54    3.35 
  -7 -10   5   26.69    3.02 
  -6 -10   5    0.98    0.48 
   6 -10  -5    1.55    0.74 
   6 -10  -5    2.74    0.80 
  -6 -10   5    2.74    0.68 
   6 -10  -5    2.35    0.70 
   6 -10  -5    2.20    0.85 
   5 -10  -5   12.25    1.87 
   5 -10  -5   10.80    1.57 
   5 -10  -5   11.54    1.78 
   4 -10  -5    4.78    1.05 
   4 -10  -5    7.03    1.23 
   3 -10  -5   10.54    1.37 
   3 -10  -5    6.63    1.31 
   3 -10  -5    6.17    1.16 
   2 -10  -5    2.36    0.62 
   2 -10  -5    1.69    0.63 
   2 -10  -5    0.83    0.56 
   2 -10  -5    1.69    0.62 
   1 -10  -5   13.10    1.60 
   1 -10  -5   10.01    1.61 
   1 -10  -5   11.16    1.56 
   1 -10  -5    8.84    1.52 
  -1  10   5    9.57    1.49 
   0 -10   5    1.72    0.51 
   0 -10  -5    1.36    0.55 
   0 -10  -5    1.65    0.62 
   0 -10  -5    1.61    0.64 
   0 -10  -5    1.72    0.56 
  -1 -10  -5    1.24    0.49 
  -1 -10  -5    0.39    0.53 
  -1 -10  -5    1.26    0.49 
  -2 -10  -5    2.33    0.61 
  -2 -10  -5    1.22    0.67 
   3 -10   5    3.25    1.04 
  -3 -10  -5    1.91    0.64 
  -3 -10  -5    2.60    0.52 
  -3  10  -5    0.87    0.61 
   4 -10   5    0.52    0.89 
  -4 -10  -5    0.23    0.50 
  -4 -10  -5    0.16    0.41 
   5 -10   5    5.36    1.26 
  -5 -10  -5    3.02    0.64 
  -5 -10  -5    2.66    0.78 
   5 -10   5    4.41    1.01 
   6 -10   5    1.02    0.82 
   6 -10   5    0.10    0.77 
   6 -10   5    1.85    0.97 
  -6 -10  -5    0.15    0.47 
   6 -10   5    0.46    0.59 
  -6 -10  -5    0.91    0.63 
   6 -10   5    0.99    0.78 
  -7 -10  -5    2.88    0.58 
  -7 -10  -5    2.35    0.68 
   7 -10   5    1.21    0.92 
   7 -10   5    1.25    0.88 
   7 -10   5    2.66    0.69 
   7 -10   5    2.42    1.03 
   7 -10   5    1.83    0.84 
  -7 -10  -5    2.58    0.63 
   8 -10   5   -0.57    0.76 
   8 -10   5    0.56    0.84 
   8 -10   5    0.46    0.54 
   8 -10   5    1.23    0.73 
  -8 -10  -5    0.82    0.49 
   8 -10   5    1.38    1.06 
  -8 -10  -5    0.83    0.41 
  -8 -10  -5    0.44    0.52 
   9 -10   5   -0.56    0.69 
  -9 -10  -5    0.65    0.45 
  -9 -10  -5    0.73    0.37 
  10 -10   5    0.46    0.68 
 -10  10  -5    1.09    0.51 
 -11  10  -5    1.83    0.46 
 -12  10  -5    0.38    0.29 
 -11 -11   5    1.40    0.29 
 -11 -11   5    2.06    0.42 
 -11  11   5    1.04    0.55 
  11  11  -5    1.09    0.43 
 -10 -11   5    1.32    0.46 
  10 -11  -5    0.62    0.45 
 -10 -11   5    1.64    0.35 
  10 -11  -5    1.01    0.56 
  10  11  -5    0.88    0.50 
   9 -11  -5    3.82    0.90 
  -9 -11   5    5.42    0.79 
   9 -11  -5    5.95    1.10 
  -9 -11   5    6.57    0.95 
   9  11  -5    9.04    1.05 
  -8 -11   5    5.43    0.81 
   8 -11  -5    3.87    1.02 
   8 -11  -5    5.54    1.18 
  -8 -11   5    6.39    1.00 
   8 -11  -5    7.27    1.17 
   7 -11  -5    9.76    1.42 
   7 -11  -5    9.61    1.63 
  -7 -11   5    9.46    1.36 
   7 -11  -5   10.25    1.58 
  -7 -11   5    9.31    1.21 
  -6 -11   5   13.84    1.67 
   6 -11  -5   14.78    2.19 
  -6 -11   5   13.01    1.77 
   6 -11  -5   13.33    1.93 
   6 -11  -5   14.01    1.87 
   6 -11  -5   14.91    2.07 
  -5 -11   5    0.33    0.55 
  -5 -11   5    0.74    0.41 
   5 -11  -5    0.61    0.59 
   5 -11  -5    1.32    0.59 
   5 -11  -5    0.14    0.61 
   5 -11  -5   -1.42    0.78 
   4 -11  -5    0.64    0.62 
   4 -11  -5    1.77    0.68 
   4 -11  -5    0.81    0.60 
   3 -11  -5    7.14    1.14 
   3 -11  -5    4.98    1.15 
   3 -11  -5    6.20    1.12 
   2 -11  -5    3.70    0.92 
   2 -11  -5    4.78    0.90 
   2 -11  -5    4.15    0.85 
   1 -11  -5    3.07    0.68 
   1 -11  -5    2.62    0.68 
   1 -11  -5    2.41    0.76 
   0 -11  -5   12.20    2.04 
   0 -11  -5   13.97    2.03 
   0 -11  -5   18.07    2.09 
   0 -11  -5   14.80    1.97 
   1 -11   5   15.00    2.29 
  -1 -11  -5   14.91    1.95 
  -1 -11  -5   11.75    1.93 
  -1 -11  -5   15.57    2.00 
   2 -11   5   10.43    1.98 
  -2 -11  -5   13.35    1.78 
   3 -11   5   10.26    1.81 
  -3 -11  -5    9.03    1.46 
   4 -11   5   14.20    2.17 
  -4 -11  -5   11.74    1.49 
  -4 -11  -5   13.75    1.83 
   4 -11   5   12.32    1.89 
   5 -11   5    4.89    1.17 
   5 -11   5    5.38    0.97 
  -5 -11  -5    6.74    1.12 
  -5 -11  -5    5.98    0.90 
   5 -11   5    7.71    1.49 
   5 -11   5    3.87    1.10 
  -5 -11  -5    5.24    0.84 
  -6 -11  -5    0.88    0.51 
   6 -11   5    0.95    0.88 
   6 -11   5    1.30    0.87 
  -6 -11  -5    1.32    0.58 
   6 -11   5    0.78    0.73 
   6 -11   5    0.92    0.64 
  -6 -11  -5    0.74    0.45 
   6 -11   5    0.11    0.81 
   7 -11   5    8.90    1.44 
  -7 -11  -5    8.57    1.13 
   7 -11   5    7.56    1.39 
   7 -11   5    9.50    1.18 
   7 -11   5    3.91    1.19 
  -7 -11  -5    8.24    1.31 
  -7 -11  -5    9.36    1.08 
   7 -11   5    5.63    1.50 
   8 -11   5    0.25    0.80 
  -8 -11  -5    0.35    0.45 
  -8 -11  -5    1.28    0.41 
   8 -11   5    0.33    0.62 
   8 -11   5    0.02    0.48 
   8 -11   5   -0.47    0.74 
   8 -11   5    1.79    0.73 
  -9 -11  -5    0.89    0.36 
  -9 -11  -5    0.42    0.44 
   9 -11   5    0.51    0.79 
   9 -11   5    0.46    0.58 
   9 -11   5    0.02    0.68 
  10 -11   5    1.25    0.69 
 -10 -11  -5    1.51    0.47 
 -10  11  -5    3.03    0.58 
 -11 -11  -5    0.60    0.33 
 -11  11  -5    0.23    0.34 
 -11 -12   5    0.33    0.28 
 -11  12   5    0.24    0.43 
  11  12  -5    0.88    0.35 
 -10 -12   5    1.92    0.47 
 -10 -12   5    2.24    0.37 
  10 -12  -5    0.66    0.44 
  10  12  -5    2.50    0.54 
   9 -12  -5    0.17    0.44 
   9 -12  -5    0.83    0.53 
  -9 -12   5    1.32    0.52 
  -9 -12   5    1.26    0.35 
   9  12  -5    0.77    0.53 
  -8 -12   5    5.72    0.94 
   8 -12  -5    5.55    1.07 
  -8 -12   5    5.49    0.81 
   8 -12  -5    6.19    1.12 
  -7 -12   5    9.66    1.39 
   7 -12  -5    9.40    1.52 
  -7 -12   5   10.32    1.24 
   7 -12  -5   10.67    1.64 
   7 -12  -5    8.39    1.59 
   7 -12  -5    9.89    1.44 
   6 -12  -5   32.06    4.75 
   6 -12  -5   39.18    4.55 
   6 -12  -5   41.58    4.87 
  -6 -12   5   37.40    4.26 
   6 -12  -5   43.36    4.52 
  -6 -12   5   38.91    4.17 
   5 -12  -5    6.32    1.39 
  -5 -12   5    8.32    1.08 
   5 -12  -5    8.00    1.36 
   5 -12  -5    7.76    1.32 
   5 -12  -5    9.75    1.32 
  -5 -12   5    7.93    1.20 
  -4 -12   5    1.16    0.48 
  -4 -12   5    2.93    0.67 
   4 -12  -5    1.62    0.70 
   4 -12  -5    2.14    0.69 
   4 -12  -5    2.65    0.84 
   3 -12  -5    4.15    0.99 
   3 -12  -5    5.35    0.96 
   3 -12  -5    2.97    0.82 
   2 -12  -5   21.66    2.87 
   2 -12  -5   23.02    2.77 
   2 -12  -5   21.31    2.86 
   1 -12  -5   15.76    2.07 
   1 -12  -5   16.22    2.07 
   1 -12  -5   13.05    2.16 
   0 -12  -5   17.67    2.48 
   0 -12   5   22.66    2.89 
   0 -12  -5   19.63    2.44 
  -1 -12  -5    9.82    1.43 
  -1 -12  -5    9.10    1.46 
   1 -12   5    9.40    1.77 
   2 -12   5    1.24    0.91 
  -2 -12  -5    1.21    0.57 
   2 -12   5    0.27    0.72 
  -3 -12  -5    0.22    0.50 
   3 -12   5   -0.45    0.67 
   3 -12   5    2.38    0.89 
  -3 -12  -5    0.54    0.44 
  -4 -12  -5   14.27    1.81 
   4 -12   5   11.39    2.13 
   4 -12   5   18.68    2.28 
   4 -12   5   21.57    2.63 
   4 -12   5   13.84    1.86 
  -4 -12  -5   16.06    1.84 
  -4 -12  -5   17.62    2.19 
   5 -12   5   11.23    1.69 
   5 -12   5    8.04    1.36 
  -5 -12  -5   11.39    1.37 
   5 -12   5   11.44    1.93 
  -5 -12  -5   11.28    1.58 
   5 -12   5    9.29    1.67 
  -5 -12  -5    9.99    1.30 
   6 -12   5    9.08    1.59 
  -6 -12  -5   11.29    1.29 
   6 -12   5    8.30    1.32 
   6 -12   5    8.70    1.57 
  -6 -12  -5   11.69    1.33 
  -6 -12  -5    7.98    1.43 
   6 -12   5   11.04    1.88 
   7 -12   5   -0.50    0.50 
  -7 -12  -5    0.23    0.51 
   7 -12   5    0.79    0.70 
  -7 -12  -5    0.35    0.45 
   7 -12   5    1.27    0.81 
  -7 -12  -5    1.10    0.41 
   7 -12   5    0.61    0.81 
   7 -12   5   -0.24    0.88 
  -8 -12  -5    7.04    0.89 
   8 -12   5    6.62    1.22 
   8 -12   5    6.48    1.18 
   8 -12   5    3.74    1.16 
   8 -12   5    5.36    0.93 
  -8 -12  -5    7.97    0.98 
  -9 -12  -5    0.83    0.34 
  -9 -12  -5    0.09    0.40 
   9 -12   5    1.24    0.74 
   9 -12   5    1.11    0.59 
   9 -12   5    0.31    0.64 
 -10 -12  -5    1.41    0.42 
 -10  12  -5    0.70    0.44 
 -11  12  -5    0.15    0.31 
 -10 -13   5    1.93    0.43 
 -10 -13   5    1.82    0.31 
 -10  13   5    0.70    0.56 
  10  13  -5    1.46    0.46 
  -9 -13   5    0.47    0.42 
   9 -13  -5    0.73    0.46 
   9 -13  -5    0.85    0.45 
  -9 -13   5    1.05    0.30 
   9  13  -5    0.25    0.49 
  -8 -13   5   -0.06    0.30 
  -8 -13   5    0.36    0.46 
   8 -13  -5    0.06    0.43 
   8 -13  -5   -0.25    0.63 
   7 -13  -5    7.61    1.18 
  -7 -13   5    5.89    0.87 
  -7 -13   5    6.05    1.01 
   7 -13  -5    6.55    1.18 
   7 -13  -5    6.77    1.11 
   6 -13  -5    1.39    0.67 
   6 -13  -5    1.97    0.65 
   6 -13  -5    0.91    0.70 
  -6 -13   5    1.21    0.42 
  -6 -13   5    1.21    0.57 
   6 -13  -5    0.37    0.78 
  -5 -13   5   20.45    2.24 
   5 -13  -5   19.20    2.83 
  -5 -13   5   18.94    2.34 
   5 -13  -5   18.57    2.49 
   5 -13  -5   20.66    2.69 
   5 -13  -5   21.07    2.52 
   4 -13  -5    9.96    1.47 
  -4 -13   5   10.94    1.28 
  -4 -13   5    9.33    1.36 
   4 -13  -5    9.82    1.59 
   4 -13  -5    9.97    1.75 
   3 -13  -5   17.92    2.32 
   3 -13  -5   20.36    2.68 
   3 -13  -5   17.40    2.77 
   3 -13  -5   25.55    2.58 
  -3 -13   5   19.83    2.35 
  -2 -13   5    9.79    1.37 
   2 -13  -5   10.89    1.49 
   2 -13  -5    9.22    1.36 
   2 -13  -5   10.30    1.55 
   2 -13  -5   10.01    1.68 
   1 -13  -5   10.25    1.59 
   1 -13  -5    8.81    1.40 
   1 -13  -5    9.03    1.42 
   0 -13  -5    5.59    1.01 
   0 -13  -5    7.09    1.17 
   0 -13   5    8.32    1.54 
  -1 -13  -5    6.27    0.85 
  -1 -13  -5    4.73    0.92 
   1 -13   5    5.56    1.34 
  -1 -13  -5    3.00    0.78 
   1 -13   5    5.05    1.11 
  -2 -13  -5    1.86    0.54 
   2 -13   5    1.34    0.86 
  -2 -13  -5    1.39    0.62 
   2 -13   5    2.13    0.61 
   2 -13   5    0.63    0.91 
   2 -13   5    1.35    0.81 
  -2 -13  -5    1.49    0.56 
   3 -13   5    6.18    1.47 
  -3 -13  -5   11.59    1.32 
  -3 -13  -5   11.28    1.34 
   3 -13   5   12.30    1.95 
   3 -13   5   10.78    1.70 
   3 -13   5    8.31    1.30 
  -4 -13  -5   10.34    1.37 
   4 -13   5   12.94    1.84 
  -4 -13  -5   12.11    1.43 
   4 -13   5   10.65    1.74 
  -4 -13  -5   11.24    1.63 
   4 -13   5   11.58    1.95 
   4 -13   5    8.85    1.41 
   5 -13   5   13.55    1.95 
   5 -13   5    8.69    1.52 
   5 -13   5    6.47    1.37 
   5 -13   5    7.70    1.20 
  -5 -13  -5    7.74    1.32 
  -5 -13  -5    8.60    1.11 
  -5 -13  -5    8.20    1.13 
  -6 -13  -5    0.85    0.50 
  -6 -13  -5    1.07    0.59 
   6 -13   5    0.93    0.62 
   6 -13   5    2.02    0.80 
  -6 -13  -5    1.62    0.46 
   6 -13   5    1.31    1.00 
   6 -13   5    2.74    0.94 
  -7 -13  -5    1.98    0.56 
   7 -13   5    1.97    0.86 
   7 -13   5    3.48    0.90 
  -7 -13  -5    2.39    0.50 
   7 -13   5    3.07    0.68 
   7 -13   5    2.80    1.16 
   8 -13   5    1.02    0.65 
   8 -13   5    1.45    0.82 
  -8 -13  -5    1.62    0.38 
  -8 -13  -5    1.39    0.48 
   8 -13   5    0.80    0.71 
   8 -13   5    0.98    0.69 
   8 -13   5   -0.03    0.46 
   9 -13   5   -0.46    0.45 
  -9 -13  -5    1.17    0.40 
  -9 -13  -5    0.66    0.30 
   9 -13   5    0.38    0.61 
 -10 -13  -5    1.10    0.38 
 -10  13  -5    2.31    0.46 
 -10 -14   5    0.13    0.26 
 -10  14   5    0.30    0.43 
  -9 -14   5    0.47    0.26 
  -9 -14   5    0.83    0.36 
   9 -14  -5    0.36    0.37 
  -8 -14   5    1.20    0.49 
   8 -14  -5    1.15    0.47 
   8 -14  -5    0.83    0.49 
  -8 -14   5    1.89    0.37 
  -7 -14   5    0.01    0.45 
  -7 -14   5    0.39    0.34 
   7 -14  -5   -0.25    0.67 
   7 -14  -5    0.68    0.50 
  -6 -14   5   10.46    1.24 
   6 -14  -5    9.46    1.53 
   6 -14  -5    9.98    1.49 
  -6 -14   5    8.81    1.32 
   6 -14  -5   11.15    1.46 
   6 -14  -5    8.81    1.63 
  -5 -14   5    2.38    0.65 
  -5 -14   5    2.79    0.55 
   5 -14  -5    3.39    0.92 
   5 -14  -5    3.33    0.77 
   5 -14  -5    1.54    0.66 
  -4 -14   5    1.90    0.50 
   4 -14  -5    2.37    0.75 
   4 -14  -5    0.91    0.73 
   4 -14  -5    1.24    0.64 
  -4 -14   5    1.97    0.62 
  -3 -14   5    0.94    0.55 
   3 -14  -5    0.44    0.52 
   3 -14  -5   -0.13    0.60 
   3 -14  -5    0.21    0.59 
  -2 -14   5    1.96    0.65 
   2 -14  -5    2.30    0.69 
   2 -14  -5    2.56    0.79 
   2 -14  -5    2.24    0.81 
   2 -14  -5    4.03    0.74 
   1 -14  -5   19.25    2.28 
   1 -14  -5   15.50    2.22 
  -1 -14   5   18.61    2.35 
   1 -14  -5   14.43    1.89 
  -1 -14   5   15.51    1.96 
   0 -14  -5    0.99    0.61 
   0 -14   5   -0.50    0.80 
   0 -14  -5    0.52    0.47 
   0 -14  -5   -0.46    0.48 
   0 -14   5   -0.31    0.48 
  -1 -14  -5   18.53    2.38 
   1 -14   5   21.45    2.45 
  -1 -14  -5   23.81    2.72 
   1 -14   5   23.67    3.05 
   1 -14   5   21.49    2.83 
   2 -14   5   21.05    2.56 
   2 -14   5   14.60    2.43 
   2 -14   5   18.71    2.17 
  -2 -14  -5   17.23    2.09 
  -2 -14  -5   17.38    2.41 
   2 -14   5   23.02    2.83 
  -2 -14  -5   17.30    2.07 
  -3 -14  -5    6.33    0.89 
  -3 -14  -5    5.59    1.09 
   3 -14   5    5.09    1.23 
   3 -14   5    5.33    0.94 
  -3 -14  -5    4.87    0.88 
   3 -14   5    7.91    1.53 
   3 -14   5    5.70    1.19 
   4 -14   5    0.51    0.82 
   4 -14   5    0.36    0.59 
   4 -14   5    1.43    0.74 
  -4 -14  -5   -0.54    0.52 
   4 -14   5   -0.53    0.74 
  -4 -14  -5    1.28    0.43 
  -4 -14  -5    0.24    0.45 
  -5 -14  -5    1.89    0.68 
   5 -14   5    1.87    0.92 
   5 -14   5    2.53    1.06 
   5 -14   5    2.54    0.71 
   5 -14   5    1.70    0.79 
  -5 -14  -5    2.67    0.52 
  -5 -14  -5    2.36    0.57 
  -6 -14  -5    0.09    0.34 
  -6 -14  -5    0.45    0.44 
   6 -14   5    1.13    0.98 
   6 -14   5    0.33    0.57 
   6 -14   5    0.61    0.66 
   6 -14   5    1.25    0.83 
   7 -14   5    1.74    0.78 
   7 -14   5    1.24    0.58 
  -7 -14  -5    2.57    0.47 
   7 -14   5    2.06    0.83 
   7 -14   5    2.04    0.78 
  -7 -14  -5    1.80    0.52 
  -8 -14  -5    1.09    0.43 
   8 -14   5    0.82    0.67 
   8 -14   5    1.45    0.77 
  -8 -14  -5    1.28    0.37 
   8 -14   5    1.89    0.51 
   8 -14   5    1.15    0.59 
   9 -14   5    0.04    0.57 
  -9 -14  -5    0.83    0.29 
  -9 -14  -5    0.73    0.35 
   9 -14   5    1.27    0.45 
  -9 -15   5    0.27    0.21 
   9 -15  -5    0.03    0.31 
  -9 -15   5    0.52    0.32 
  -9  15   5    0.56    0.49 
   8 -15  -5    0.57    0.39 
  -8 -15   5    1.20    0.31 
  -8 -15   5    0.41    0.38 
  -7 -15   5    0.27    0.31 
   7 -15  -5    0.41    0.42 
   7 -15  -5   -0.03    0.47 
  -7 -15   5    2.18    0.53 
  -6 -15   5    1.37    0.40 
   6 -15  -5    0.67    0.74 
  -6 -15   5    1.80    0.55 
   6 -15  -5    0.47    0.45 
   5 -15  -5    2.86    0.75 
  -5 -15   5    3.32    0.75 
  -5 -15   5    5.30    0.69 
   5 -15  -5    4.47    0.85 
   4 -15  -5    0.10    0.46 
   4 -15  -5    0.13    0.54 
  -4 -15   5    0.57    0.50 
   4 -15  -5   -0.35    0.61 
  -4 -15   5    0.21    0.38 
  -3 -15   5    0.40    0.50 
   3 -15  -5    1.05    0.59 
   3 -15  -5    0.06    0.47 
   3 -15  -5    1.84    0.74 
   2 -15  -5    2.80    0.76 
  -2 -15   5    3.79    0.75 
   2 -15  -5    3.32    0.92 
   2 -15  -5    5.92    0.82 
   1 -15  -5    8.84    1.13 
  -1 -15   5    6.80    1.08 
   1 -15  -5    7.22    1.20 
   0 -15   5    1.79    0.61 
   0 -15  -5    3.12    0.64 
   0 -15  -5    2.14    0.65 
   0 -15  -5    1.12    0.69 
   0 -15   5    3.12    0.99 
   1 -15   5   21.60    2.63 
   1 -15   5   16.29    1.96 
  -1 -15  -5   15.35    1.91 
  -1 -15  -5   15.61    2.20 
   1 -15   5   15.89    2.32 
   2 -15   5    1.78    0.60 
  -2 -15  -5    1.36    0.62 
   2 -15   5    1.23    0.84 
  -2 -15  -5    0.87    0.49 
   2 -15   5    0.11    0.72 
   2 -15   5    0.53    0.90 
  -2 -15  -5    1.92    0.54 
  -3 -15  -5   11.73    2.03 
  -3 -15  -5   14.98    1.83 
   3 -15   5   18.36    2.35 
   3 -15   5   16.31    2.25 
  -3 -15  -5   15.63    1.82 
   3 -15   5   17.26    1.92 
   3 -15   5   18.92    2.52 
  -4 -15  -5    2.03    0.53 
   4 -15   5    1.27    0.95 
  -4 -15  -5    1.73    0.46 
  -4 -15  -5    1.34    0.64 
   4 -15   5    2.98    0.97 
   4 -15   5    1.99    0.68 
   4 -15   5    1.84    0.79 
  -5 -15  -5    4.52    0.69 
   5 -15   5    4.04    0.96 
   5 -15   5    5.81    1.39 
   5 -15   5    3.89    1.05 
  -5 -15  -5    4.86    0.77 
   5 -15   5    4.09    0.83 
   6 -15   5    3.49    0.94 
   6 -15   5    2.27    0.79 
  -6 -15  -5    2.54    0.49 
   6 -15   5    2.73    0.67 
  -6 -15  -5    3.43    0.61 
   6 -15   5    1.73    0.80 
  -7 -15  -5    0.20    0.28 
   7 -15   5    0.02    0.45 
   7 -15   5    0.24    0.71 
   7 -15   5    0.51    0.54 
  -7 -15  -5    0.19    0.38 
   7 -15   5    0.12    0.56 
   8 -15   5    0.36    0.48 
   8 -15   5    0.62    0.67 
  -8 -15  -5    1.32    0.39 
  -8 -15  -5    1.24    0.31 
   9 -15   5    0.11    0.54 
  -9 -15  -5    0.11    0.21 
  -9 -15  -5    0.20    0.29 
  -9  15  -5    0.40    0.37 
   8 -16  -5    0.04    0.31 
  -8 -16   5    0.06    0.31 
  -8 -16   5    0.01    0.21 
   7 -16  -5    0.33    0.39 
  -7 -16   5    1.47    0.32 
  -7 -16   5    1.18    0.42 
   7 -16  -5    0.70    0.39 
  -6 -16   5    0.90    0.46 
  -6 -16   5    0.88    0.35 
   6 -16  -5    0.35    0.39 
  -5 -16   5    4.62    0.65 
  -5 -16   5    3.82    0.77 
   4 -16  -5    0.49    0.45 
  -4 -16   5    0.34    0.46 
   3 -16  -5    1.22    0.55 
  -3 -16   5    2.26    0.57 
  -2 -16   5    3.31    0.68 
   2 -16  -5    2.45    0.68 
   1 -16  -5    0.57    0.51 
  -1 -16   5    0.41    0.48 
   1 -16  -5    0.15    0.48 
   0 -16   5   27.26    2.93 
   0 -16   5   26.72    3.28 
   0 -16  -5   24.70    2.90 
   1 -16   5    8.70    1.29 
  -1 -16  -5   10.12    1.53 
   1 -16   5    9.85    1.63 
  -1 -16  -5   11.51    1.33 
   2 -16   5    9.94    1.64 
  -2 -16  -5    9.53    1.29 
   2 -16   5   11.67    1.65 
   2 -16   5    9.22    1.32 
  -2 -16  -5   10.04    1.23 
   2 -16   5   10.00    1.83 
  -3 -16  -5    2.57    0.58 
   3 -16   5    3.75    0.93 
   3 -16   5    2.89    1.10 
  -3 -16  -5    2.90    0.55 
   3 -16   5    3.43    1.01 
   3 -16   5    2.12    0.68 
   4 -16   5    6.52    1.40 
  -4 -16  -5    9.68    1.11 
   4 -16   5    7.76    1.20 
   4 -16   5    8.32    1.71 
   4 -16   5    7.28    1.35 
  -4 -16  -5   10.26    1.17 
   5 -16   5    4.35    1.00 
  -5 -16  -5    4.52    0.68 
   5 -16   5    7.44    1.50 
   5 -16   5    6.22    0.89 
  -5 -16  -5    4.59    0.77 
   5 -16   5    4.21    1.07 
   6 -16   5   -0.40    0.51 
   6 -16   5    0.03    0.54 
  -6 -16  -5    0.31    0.28 
   6 -16   5   -0.39    0.63 
  -6 -16  -5    0.16    0.35 
   6 -16   5    0.14    0.47 
   7 -16   5    1.44    0.69 
  -7 -16  -5    2.05    0.45 
   7 -16   5    0.70    0.44 
   7 -16   5    1.20    0.56 
  -7 -16  -5    2.16    0.37 
   7 -16   5    2.26    0.77 
  -8 -16  -5    0.25    0.29 
   8 -16   5   -0.50    0.50 
  -8 -16  -5    0.33    0.23 
   8 -16   5    0.01    0.38 
  -7 -17   5    0.01    0.31 
  -7 -17   5    0.11    0.21 
  -6 -17   5    0.39    0.27 
  -6 -17   5    0.14    0.36 
   6 -17  -5    0.18    0.37 
  -5 -17   5    1.30    0.34 
  -5 -17   5    0.39    0.41 
   5 -17  -5    0.39    0.41 
   4 -17  -5    0.11    0.40 
  -4 -17   5    0.29    0.43 
  -2 -17   5   12.58    1.57 
  -1 -17   5   -0.39    0.44 
   1 -17  -5    0.75    0.49 
   0 -17  -5    1.95    0.56 
   0 -17   5    1.99    0.59 
   1 -17   5    2.83    0.67 
  -1 -17  -5    3.16    0.64 
   1 -17   5    2.98    0.93 
   2 -17   5    0.75    0.53 
   2 -17   5    1.30    0.96 
  -2 -17  -5    0.99    0.45 
   2 -17   5    0.29    0.74 
  -3 -17  -5    0.04    0.35 
   3 -17   5    0.65    0.66 
   3 -17   5    0.01    0.53 
   3 -17   5   -0.36    0.88 
  -3 -17  -5    0.58    0.40 
   3 -17   5   -0.15    0.73 
   4 -17   5    0.93    0.55 
   4 -17   5    0.94    0.62 
   4 -17   5    0.38    0.57 
  -4 -17  -5    0.16    0.37 
   4 -17   5   -0.46    0.64 
  -4 -17  -5    0.88    0.34 
   5 -17   5    2.68    0.65 
  -5 -17  -5    3.45    0.51 
   5 -17   5    2.73    0.85 
   5 -17   5    2.28    0.84 
   5 -17   5    3.25    0.79 
  -5 -17  -5    3.52    0.58 
   6 -17   5    0.78    0.42 
  -6 -17  -5    0.78    0.34 
  -6 -17  -5    0.41    0.27 
   6 -17   5    0.00    0.47 
   6 -17   5    0.24    0.64 
   6 -17   5    0.30    0.57 
   7 -17   5    0.65    0.46 
   7 -17   5    1.52    0.62 
  -7 -17  -5    1.16    0.34 
  -7 -17  -5    1.37    0.30 
  -6 -18   5    0.27    0.31 
  -5 -18   5    3.46    0.59 
   4 -18  -5    0.49    0.40 
  -4 -18   5    0.08    0.38 
  -3 -18   5    1.42    0.45 
   3 -18  -5    1.05    0.50 
   2 -18  -5    1.34    0.50 
  -2 -18   5    0.38    0.44 
  -1 -18   5    0.94    0.46 
   0 -18   5    0.87    0.48 
  -1 -18  -5    2.17    0.52 
   1 -18   5    2.27    0.59 
   1 -18   5    2.36    0.86 
   2 -18   5    1.51    0.77 
  -2 -18  -5    1.61    0.44 
   2 -18   5    0.98    0.54 
   3 -18   5    1.89    0.58 
   3 -18   5    1.45    0.75 
  -3 -18  -5    2.18    0.41 
   3 -18   5    3.44    0.86 
   3 -18   5    1.63    0.69 
  -3 -18  -5    2.34    0.48 
   4 -18   5    1.16    0.68 
  -4 -18  -5    1.31    0.40 
   4 -18   5    1.11    0.60 
   4 -18   5    1.62    0.52 
   4 -18   5    1.41    0.72 
  -4 -18  -5    1.58    0.37 
   5 -18   5    2.01    0.79 
   5 -18   5    3.65    0.61 
  -5 -18  -5    3.69    0.52 
   5 -18   5    5.07    0.90 
   5 -18   5    3.40    0.75 
  -5 -18  -5    3.80    0.57 
  -6 -18  -5    1.07    0.32 
   6 -18   5    0.48    0.44 
   6 -18   5    1.27    0.62 
  -6 -18  -5    1.10    0.29 
   6 -18   5    0.58    0.34 
  -1 -19   5    1.12    0.46 
   0 -19   5    1.64    0.50 
   1 -19   5   -0.03    0.45 
   2 -19   5    0.22    0.62 
   2 -19   5    0.60    0.46 
  -2 -19  -5   -0.41    0.32 
  -3 -19  -5    0.48    0.34 
   3 -19   5    0.69    0.62 
   4 -19   5    0.67    0.47 
  -4 -19  -5    0.62    0.29 
   4 -19   5    1.26    0.62 
  -4 -19  -5    0.53    0.30 
  -5 -19  -5    0.75    0.29 
   5 -19   5    0.89    0.56 
  13   0  -6    2.37    0.40 
 -13   0   6    2.28    0.35 
  13   0  -6    2.08    0.51 
  12   0  -6   -0.40    0.46 
 -12   0   6    0.46    0.31 
  12   0  -6    0.25    0.38 
 -12   0   6    0.68    0.41 
  11   0  -6    1.88    0.70 
 -11   0   6    3.47    0.66 
 -11   0   6    2.96    0.54 
  10   0  -6    3.62    0.83 
  10   0  -6    2.34    0.82 
 -10   0   6    5.67    0.93 
  -9   0   6    0.34    0.65 
   9   0  -6    0.07    0.62 
   9   0  -6    0.21    0.56 
  -8   0   6   -0.19    0.79 
   8   0  -6    0.50    0.49 
   7   0  -6   11.67    1.61 
  -7   0   6   11.33    2.03 
   6   0  -6   10.05    1.47 
  -6   0   6   11.28    1.84 
  -5   0   6   18.47    2.52 
  -5   0   6   14.24    1.96 
   5   0  -6   16.50    2.00 
  -4   0   6    0.24    0.34 
   4   0  -6    0.02    0.31 
   4   0  -6    0.25    0.38 
   3   0  -6   12.55    1.66 
   3   0  -6   12.80    1.60 
   2   0  -6   25.42    2.89 
   2   0  -6   23.54    3.01 
   2   0  -6   25.64    2.77 
   1   0  -6    0.28    0.32 
   1   0  -6    0.64    0.33 
   1   0  -6    0.19    0.31 
  -1   0   6    1.01    0.22 
   0   0  -6   50.69    5.24 
   0   0   6   48.73    3.96 
   0   0  -6   47.39    5.73 
  -1   0  -6   13.48    1.57 
  -2   0  -6   11.15    1.33 
  -3   0  -6    1.52    0.47 
  -3   0  -6    1.26    0.38 
  -4   0  -6    5.16    0.74 
  -4   0  -6    4.65    0.74 
  -5   0  -6    1.35    0.39 
  -5   0  -6    0.77    0.39 
  -6   0  -6    1.66    0.53 
   6   0   6    1.51    0.95 
  -6   0  -6    2.12    0.47 
  -7   0  -6    0.31    0.36 
   7   0   6   -0.37    0.91 
   8   0   6    2.42    1.20 
  -8   0  -6    3.32    0.67 
   9   0   6   -0.57    0.99 
   9   0   6    0.27    0.56 
  10   0   6    3.30    0.70 
  10   0   6    3.39    1.12 
 -11   0  -6    0.69    0.40 
  11   0   6    0.42    0.39 
  11   0   6    1.01    0.84 
 -12   0  -6    5.35    0.63 
  12   0   6    5.64    0.82 
  12   0   6    2.91    0.97 
  13   0   6    1.53    0.42 
 -13   0  -6    1.34    0.27 
 -13  -1   6    0.85    0.25 
  13  -1  -6    1.46    0.43 
  13  -1  -6    1.05    0.30 
 -13  -1   6    0.85    0.37 
  13   1  -6    1.23    0.33 
 -13   1   6    1.60    0.31 
  13   1  -6    1.75    0.46 
 -12  -1   6   -0.08    0.37 
  12  -1  -6    0.94    0.53 
 -12  -1   6    0.42    0.29 
  12  -1  -6   -0.01    0.33 
 -12   1   6    0.85    0.34 
  12   1  -6    0.56    0.50 
  11  -1  -6    0.47    0.49 
  11  -1  -6    1.63    0.63 
 -11  -1   6    0.93    0.38 
 -11  -1   6    1.33    0.51 
  11   1  -6    0.31    0.58 
 -10  -1   6    3.49    0.72 
  10  -1  -6    3.47    0.80 
 -10  -1   6    3.28    0.59 
  10   1  -6    3.09    0.82 
 -10   1   6    3.82    0.85 
  10   1  -6    3.16    0.80 
   9  -1  -6    0.64    0.64 
  -9  -1   6    1.03    0.54 
  -9  -1   6    0.55    0.66 
   9  -1  -6    0.34    0.56 
   9   1  -6    0.85    0.64 
   9   1  -6    0.35    0.51 
  -9   1   6    2.24    0.98 
  -9   1   6    0.42    0.70 
   8  -1  -6   -0.17    0.43 
   8   1  -6    0.54    0.51 
  -8   1   6    1.04    0.88 
   7  -1  -6    3.40    0.74 
   7   1  -6    2.41    0.65 
  -7   1   6    1.74    0.94 
   6  -1  -6   21.32    2.71 
  -6   1   6   25.09    3.58 
   6   1  -6   22.32    2.72 
   5  -1  -6   12.11    1.53 
   5   1  -6   11.92    1.52 
  -5   1   6   11.95    1.83 
  -5   1   6    9.16    1.44 
   4  -1  -6   14.85    1.78 
   4  -1  -6   13.75    1.72 
   4   1  -6   15.24    1.73 
  -4   1   6   12.55    2.11 
  -4   1   6   11.57    1.67 
   3  -1  -6    4.15    0.77 
   3  -1  -6    3.07    0.66 
   3  -1  -6    3.12    0.67 
   3   1  -6    4.51    0.75 
   3   1  -6    5.60    0.74 
  -3   1   6    3.98    0.68 
   2  -1  -6   34.41    4.26 
   2  -1  -6   38.76    4.10 
  -2  -1   6   37.63    3.09 
   2  -1  -6   38.59    4.48 
  -2   1   6   37.33    4.27 
   2   1  -6   37.41    4.26 
   2   1  -6   38.14    4.06 
   2   1  -6   38.17    4.46 
   1  -1  -6   78.65    9.21 
  -1  -1   6   84.12    6.37 
   1  -1  -6   77.66    8.38 
   1  -1  -6   77.55    8.78 
   1   1  -6   83.78    8.36 
   1   1  -6   73.33    9.18 
   1   1  -6   77.55    8.77 
   0  -1  -6   25.93    3.56 
   0  -1  -6   26.01    3.41 
   0  -1  -6   31.65    3.30 
   0  -1   6   32.03    2.47 
   0   1  -6   33.48    3.27 
   0   1   6   31.26    2.13 
  -1  -1  -6    7.38    1.08 
  -1  -1  -6    7.47    1.01 
   1  -1   6    8.96    0.75 
   1   1   6    7.01    0.60 
  -1   1  -6    6.50    0.95 
  -2  -1  -6   66.68    6.90 
  -2  -1  -6   75.43    8.36 
  -2  -1  -6   75.01    7.63 
  -2   1  -6   69.17    7.60 
  -3  -1  -6    5.53    0.83 
  -3  -1  -6    7.70    0.85 
  -3   1  -6    4.86    0.79 
  -4  -1  -6    2.91    0.61 
  -4  -1  -6    4.92    0.65 
  -4   1  -6    3.44    0.62 
  -4   1  -6    4.71    0.72 
  -5  -1  -6   11.50    1.56 
  -5  -1  -6   12.78    1.40 
  -5   1  -6   13.03    1.43 
  -5   1  -6   11.96    1.56 
  -6  -1  -6   16.84    2.17 
  -6  -1  -6   20.46    1.97 
   6  -1   6   17.51    2.69 
  -6   1  -6   20.44    1.97 
  -6   1  -6   16.66    2.16 
  -7  -1  -6   10.29    1.36 
   7  -1   6   10.97    1.99 
   7   1   6   15.22    2.14 
  -7   1  -6   11.54    1.38 
   8  -1   6   56.18    5.21 
   8  -1   6   47.89    6.54 
   8   1   6   48.78    6.55 
   9  -1   6   11.35    1.87 
   9  -1   6    6.69    1.06 
   9   1   6    7.26    1.12 
   9   1   6    7.48    1.71 
 -10  -1  -6    0.53    0.37 
  10  -1   6    1.11    0.45 
  10  -1   6    0.24    0.87 
  10   1   6   -1.12    0.96 
  10   1   6    0.00    0.53 
 -10   1  -6    0.09    0.49 
  11  -1   6    1.90    0.68 
  11  -1   6    0.76    0.85 
 -11  -1  -6    1.54    0.41 
 -11   1  -6    0.93    0.51 
  11   1   6    0.45    0.85 
  11   1   6    1.12    0.48 
 -12  -1  -6    0.56    0.29 
  12  -1   6    0.91    0.72 
  12  -1   6    0.06    0.46 
 -12   1  -6    0.37    0.40 
 -12   1  -6    0.05    0.30 
  12   1   6   -0.20    0.65 
  13  -1   6    1.18    0.36 
 -13  -1  -6    0.24    0.18 
  13   1   6    1.83    0.42 
 -13   1  -6    0.32    0.22 
  13  -2  -6    0.69    0.40 
  13  -2  -6    0.10    0.23 
 -13  -2   6    0.65    0.19 
 -13  -2   6    0.63    0.32 
 -13   2   6   -0.04    0.24 
  13   2  -6    0.19    0.37 
 -12  -2   6    0.26    0.38 
  12  -2  -6    0.34    0.50 
  12  -2  -6    0.06    0.31 
 -12  -2   6    0.35    0.28 
  12   2  -6   -0.48    0.46 
 -11  -2   6    1.37    0.50 
 -11  -2   6    1.58    0.41 
  11  -2  -6    1.62    0.63 
  11  -2  -6    1.08    0.46 
  11   2  -6    0.78    0.61 
 -11   2   6    2.00    0.67 
  10  -2  -6    9.59    1.47 
 -10  -2   6   12.16    1.27 
 -10  -2   6   12.49    1.47 
  10  -2  -6    9.40    1.31 
 -10   2   6   13.38    2.06 
  10   2  -6   11.73    1.54 
 -10   2   6    9.38    1.57 
   9  -2  -6    1.26    0.69 
  -9  -2   6    1.81    0.47 
  -9  -2   6    1.51    0.60 
   9  -2  -6    0.50    0.66 
   9   2  -6    1.99    0.69 
  -9   2   6    1.27    0.77 
   9   2  -6    1.82    0.63 
  -9   2   6    3.13    1.09 
   8  -2  -6    1.61    0.62 
   8   2  -6    0.74    0.56 
  -8   2   6    0.80    0.88 
   7  -2  -6    3.86    0.79 
  -7   2   6    5.29    1.17 
   7   2  -6    4.13    0.83 
   7   2  -6    3.58    0.71 
   6  -2  -6    0.41    0.42 
  -6   2   6    1.05    0.70 
   6   2  -6    0.84    0.47 
   5  -2  -6   11.43    1.78 
   5  -2  -6   11.79    1.67 
  -5   2   6   11.58    1.63 
   5   2  -6   15.73    1.70 
   4  -2  -6   48.08    5.55 
   4  -2  -6   50.58    5.30 
  -4   2   6   42.27    5.28 
   4   2  -6   45.49    5.28 
   3  -2  -6   34.86    3.79 
   3  -2  -6   32.78    4.12 
   3  -2  -6   35.41    3.94 
   3   2  -6   31.05    4.07 
  -3   2   6   33.14    3.93 
   3   2  -6   39.10    3.94 
  -2  -2   6   20.13    1.79 
   2  -2  -6   21.33    2.61 
   2  -2  -6   18.16    2.39 
   2  -2  -6   19.63    2.47 
  -2   2   6   20.43    2.48 
   2   2  -6   26.25    2.60 
   1  -2  -6   20.90    2.69 
   1  -2  -6   23.10    2.85 
  -1  -2   6   23.23    1.95 
   1  -2  -6   23.81    2.63 
   1   2  -6   26.47    2.80 
  -1   2   6   22.93    2.69 
   1   2  -6   21.43    2.67 
   1   2  -6   23.55    2.55 
   0  -2  -6   11.25    1.29 
   0  -2  -6   10.34    1.28 
   0  -2   6    9.91    0.88 
   0  -2  -6   10.88    1.31 
   0   2   6    8.52    0.74 
   0   2  -6    7.56    1.14 
  -1  -2  -6   36.34    4.36 
   1  -2   6   41.14    3.04 
  -1  -2  -6   38.46    4.02 
  -1  -2  -6   31.16    3.61 
  -1  -2  -6   33.21    4.17 
  -1   2  -6   39.73    3.96 
  -2  -2  -6    0.95    0.39 
  -2  -2  -6    3.15    0.54 
  -2  -2  -6    0.53    0.36 
  -2  -2  -6    0.92    0.39 
  -2   2  -6    1.56    0.37 
  -3  -2  -6    8.47    1.06 
  -3  -2  -6    7.70    1.16 
  -3   2  -6   11.13    1.16 
  -4  -2  -6    8.90    1.12 
  -4  -2  -6    6.81    0.98 
  -4  -2  -6    7.13    0.86 
  -4   2  -6    5.54    0.93 
  -4   2  -6    5.71    0.92 
  -5  -2  -6    8.16    0.99 
  -5  -2  -6    7.12    1.11 
  -5   2  -6    8.02    1.11 
  -5   2  -6    8.26    1.04 
  -6  -2  -6    5.22    0.73 
   6  -2   6    4.09    1.14 
  -6  -2  -6    4.40    0.82 
  -6   2  -6    3.21    0.74 
  -6   2  -6    5.73    0.74 
  -7  -2  -6    0.95    0.44 
   7  -2   6    3.00    1.05 
  -7   2  -6    2.11    0.51 
   7   2   6   -0.28    0.99 
   8  -2   6   15.56    2.52 
   8  -2   6   14.38    1.74 
   8   2   6   17.48    2.59 
   9  -2   6   -0.41    1.01 
   9  -2   6    0.05    0.44 
  -9  -2  -6    0.39    0.39 
  -9   2  -6    0.50    0.58 
   9   2   6    0.92    1.08 
  10  -2   6    0.34    0.86 
 -10  -2  -6    0.35    0.34 
  10  -2   6    0.53    0.60 
  10   2   6    1.49    0.62 
  10   2   6    1.34    1.06 
 -10   2  -6    0.29    0.52 
  11  -2   6    0.24    0.52 
 -11  -2  -6    1.02    0.34 
  11  -2   6    1.03    0.87 
  11   2   6    0.03    0.79 
 -11   2  -6    1.07    0.50 
  11   2   6    0.82    0.52 
  12  -2   6    4.43    0.71 
  12  -2   6    2.84    0.92 
 -12  -2  -6    4.20    0.50 
 -12   2  -6    2.77    0.60 
  13  -2   6    0.53    0.29 
 -13   2  -6    0.80    0.25 
 -13  -3   6    0.98    0.32 
  13   3  -6    0.32    0.37 
 -12  -3   6    3.09    0.56 
  12  -3  -6    2.41    0.46 
 -12  -3   6    2.37    0.39 
  12  -3  -6    3.21    0.65 
  12   3  -6    1.63    0.58 
 -11  -3   6    6.26    0.90 
 -11  -3   6    6.31    0.74 
  11  -3  -6    5.41    0.97 
  11  -3  -6    5.58    0.79 
  11   3  -6    5.92    0.97 
 -11   3   6    4.82    1.01 
 -10  -3   6    5.05    0.70 
 -10  -3   6    5.75    0.87 
  10  -3  -6    7.16    0.85 
  10  -3  -6    6.02    0.96 
  10   3  -6    5.04    0.94 
 -10   3   6    4.95    1.04 
  10   3  -6    1.66    0.81 
 -10   3   6    7.07    1.43 
   9  -3  -6    3.34    0.88 
  -9  -3   6    6.62    0.76 
  -9  -3   6    4.13    0.86 
   9  -3  -6    5.32    0.81 
   9   3  -6    4.92    0.92 
   9   3  -6    4.09    0.95 
  -9   3   6    5.41    1.06 
  -9   3   6    5.09    1.24 
  -8  -3   6    3.22    0.57 
   8  -3  -6    4.38    0.94 
   8  -3  -6    1.59    0.72 
   8  -3  -6    3.47    0.70
[truncated: 387,396 more chars]
